# Supplementary material
Source: PubMed Central journal article supplement (PMC4646739)
Supplement: NIHMS697052-supplement.pdf [file NIHMS697052-supplement.pdf]

**Table S1. Superconserved transcriptomic response to bPTH(7-34).** For each specific transcript significantly regulated in each tissue the z ratio (bPTH(7-34) compared to vehicle control) is indicated.

| <b>Gene Symbol</b> | <b>Aorta</b> | <b>Bone</b> | <b>Heart</b> | <b>Kidney</b> | <b>Liver</b> | <b>Lung</b> |
|--------------------|--------------|-------------|--------------|---------------|--------------|-------------|
| Acadl              | -3.42        |             |              | -1.57         |              | -2.09       |
| Acads              | -2.04        |             |              | -1.77         | -2.83        | -2.41       |
| Acot8              |              | -1.65       | -1.6         |               | -1.56        | -2.6        |
| Acta2              | 6.32         |             |              |               | 2.51         | 4.72        |
| Acvr2b             |              |             |              | -2.66         |              | -2.77       |
| Add3               | -2.2         |             |              | -3.83         |              | -2.63       |
| Alkbh7             |              |             |              | -1.81         | -2.25        | -2.43       |
| Araf               |              |             |              |               | -1.74        | -1.5        |
| Arhgap17           |              |             |              | -2.06         |              | -2.42       |
| Atf4               |              |             | 4.26         |               | 3.59         | 2.04        |
| Atpaf2             | -2.32        | -1.63       |              |               |              | -2.17       |
| Caprin1            |              |             |              | 1.75          | 4.58         |             |
| Casp6              | -2.07        |             |              |               |              | -1.74       |
| Casp9              |              | -1.77       |              |               |              | -2.34       |
| Cd151              |              |             |              | 1.78          | 1.64         | 2.31        |
| Cd63               |              |             | 2.96         |               | 2.45         |             |
| Cd81               |              | 1.83        | 1.8          |               |              | 2.13        |
| Cdkn1c             | -1.71        |             |              |               | -2.12        | -1.73       |
| Cdkn2b             | 2.89         |             |              |               | 2.45         |             |
| Cdv3               |              |             | 2.58         | 2.79          | 1.83         |             |
| Cnih               |              |             | 3.24         |               | 3.16         | 1.7         |
| Col1a1             | 3.53         | 5.35        |              |               | 2.43         |             |
| Col4a1             | 2.28         | 2.78        |              |               | 1.96         | 1.99        |
| Cox4nb             |              | -1.85       |              |               | -1.6         | -2.45       |
| Creld2             |              |             | 2.73         | 3.42          | 2.2          |             |
| Ctnna1             |              |             |              | 2.88          | 1.69         |             |
| Cyp4f13            |              |             |              | -1.7          | -3.44        | -2.65       |
| Dctn4              |              | -1.96       |              |               | -1.8         | -1.62       |
| Dnajb9             |              |             |              | 2.84          | 1.85         | 3.98        |
| Dusp7              |              |             |              | -4.39         | -2.05        | -1.55       |
| Dynll1             |              |             |              |               | 1.97         | 2.28        |
| Eef1b2             | 2.49         |             | 2.07         |               | 2.28         | 5.38        |
| Eif4ebp1           |              |             |              |               | 1.77         | 1.91        |
| Ep300              |              |             |              | -2.47         |              | -2.68       |
| Etfa               |              |             |              |               | 2.03         | 3.45        |
| Fadd               |              |             |              |               | -2.44        | -2.13       |

|          |       |       |       |       |       |       |
|----------|-------|-------|-------|-------|-------|-------|
| Fam207a  |       | -2.87 |       |       | -2.85 | -3.6  |
| Gbl      |       | -2.8  |       |       | -2.12 | -2.2  |
| Ghr      |       |       |       |       | 2.3   | 2.23  |
| Gnb2     |       |       |       |       | -2.8  | -1.59 |
| Gorasp2  |       |       | 2.41  |       | 3.41  | 2.02  |
| Gpatch2  | -2.58 |       |       |       | -2.93 | -1.51 |
| Gpd2     | -4.01 |       |       | -1.85 |       |       |
| Gpr172b  | -1.72 | -1.67 |       |       | -1.61 | -1.75 |
| Hbegf    |       |       | 2.9   |       | 3.18  |       |
| Hdgf     | 2.31  | 2.26  |       |       | 1.64  |       |
| Hsp90ab1 |       |       | 4.1   | 2.18  | 4.76  | 3.48  |
| Hspa8    |       |       | 4.37  |       | 9.96  | 3.31  |
| Hspb1    | 4.91  |       |       |       | 4.41  | 2.59  |
| Icam1    | 2.79  |       |       |       | 3.41  |       |
| Ifngr1   |       | 2.53  | 2.77  |       | 2.43  |       |
| Ift172   | -1.8  |       |       |       | -1.91 | -2.74 |
| Ift20    | 1.53  |       |       |       | 2.23  | 2.4   |
| Igfbp7   |       |       |       |       | 2.37  | 2.15  |
| Ing4     |       |       |       | -1.63 | -2.11 | -2.81 |
| Irak3    |       | -3.28 |       |       | -1.59 |       |
| Irf2bp1  |       | -2.36 |       |       | -3.59 | -2.25 |
| Itgb5    |       | 2.55  |       |       | 2.34  | 1.53  |
| Jmjd3    |       | -1.97 |       | -1.66 | -1.92 |       |
| Kif3a    |       | -2.59 |       | -2.23 | -1.88 |       |
| Klf2     | -2.29 |       | -8.79 |       | -4.98 | -2.36 |
| Lass2    |       |       |       | 1.84  | 2.45  | 3.2   |
| Lsm3     |       | -2.17 |       | -1.52 |       | -1.52 |
| Ltbp4    | 2.36  |       |       | 1.74  | 2.04  |       |
| Luc7l3   | -2.07 |       |       | -2.97 | -2.19 |       |
| Lym2     |       | -1.83 |       | -3.59 | -2.09 |       |
| Lysmd1   | -1.83 |       |       |       | -1.79 | -2.52 |
| Man2a1   |       |       | 2.98  | 2.59  | 1.68  | 1.56  |
| Map2k3   |       | 2.55  |       |       | 1.82  |       |
| Mapbpip  |       | -2.67 |       |       | -1.83 | 1.82  |
| Mark3    | -1.72 |       |       |       | -2.2  | -1.58 |
| Mmp2     | 1.8   | 4.37  |       |       |       |       |
| Mterf1b  | -2.99 |       | -1.77 | -2.79 | -2.82 |       |
| Mterfd2  |       |       |       | -2.32 | -2.58 |       |
| Myg1     |       | -1.83 |       | -2.4  |       | -1.74 |
| N4bp2l1  | -1.95 |       |       | -3.71 |       | -3.94 |
| Ncoa6    |       | 1.84  |       |       | 2.42  |       |

|         |       |       |      |       |       |       |
|---------|-------|-------|------|-------|-------|-------|
| Neo1    |       | 2.53  | 2.48 |       | 1.6   |       |
| Nsmce1  |       |       |      | -2.08 | -1.97 | -1.81 |
| Ogn     |       | 3.57  |      | 2.84  | 3.85  |       |
| Pdia3   |       |       | 2.85 |       | 3.12  |       |
| Pdpk1   | -3.92 | -2.77 |      |       | -4.23 | -3.16 |
| Pex11a  | -1.97 |       |      | -2.04 | -1.99 |       |
| Picalm  |       |       |      | 4.15  | 2.48  | 3.45  |
| Pik3c3  | -1.78 |       |      |       |       | -2.68 |
| Ppp1r10 |       | -3.93 |      |       | -2.4  | -1.83 |
| Ppp1r35 |       | -1.55 |      |       | -2.16 | -2.04 |
| Prkacb  |       |       |      |       | -2.36 | -1.83 |
| Prkch   |       | 3.09  |      |       | 5.27  |       |
| Prkcz   |       |       |      |       | -2.38 | -3.01 |
| Psmb7   |       |       |      | 1.61  | 3.9   | 1.74  |
| Psmc10  |       | -1.75 |      | -2.38 |       | -1.76 |
| Psmg3   |       | -2.12 |      |       | -1.63 | -3.42 |
| Ptpn11  | 1.75  |       | 3.47 | 2.23  | 1.69  |       |
| Rasa1   |       | -2.2  |      |       | -2.02 | -2.13 |
| Rhot2   |       |       |      |       | -1.68 | -2.14 |
| Rnasek  | 1.62  |       | 2.26 |       | 1.95  | 1.8   |
| Rnf135  | -1.53 | -2.07 |      |       |       | -4.32 |
| Rps3    |       |       | 2.48 |       | 2.12  | 3.04  |
| Rusc2   |       |       | 2.27 | 2.2   |       | 4.76  |
| Sepp1   |       | 4.44  |      |       | 4.57  | 6     |
| Sin3a   |       |       |      |       | -1.65 | -3.22 |
| Snx2    | -2.55 |       |      | -2.31 |       | -2.51 |
| Sparc   | 3.09  | 5.16  |      |       | 5.3   | 1.73  |
| Spsb2   |       | -1.78 |      | -2.21 |       | -1.71 |
| Tgfbr2  |       | 3.38  |      | 3.36  | 2.58  |       |
| Timm44  | -1.96 |       |      |       | -1.69 | -1.7  |
| Tmem53  |       |       |      | -1.76 | -2.22 | -2.47 |
| Tmem85  |       |       | 2.04 |       | 3.2   | 1.97  |
| Tomm7   | 2.66  |       |      |       | 1.6   | 2.05  |
| Trf     |       |       |      | 5.16  | 2.09  | 2.17  |
| Txn14b  | -2.22 | -1.56 |      | -1.87 | -1.83 |       |
| Utx     | -1.81 |       |      | -2.42 | -2.68 | -2.34 |
| Vkorc1  | 2.84  | 2.81  |      |       | 1.82  |       |
| Yeats4  |       | -1.85 |      | -1.89 | -2.32 | -2.23 |
| Ywhab   |       |       |      | 2.88  |       | 2.79  |
| Ywhag   |       |       |      | 1.97  |       | 2.23  |

**Table S2. Superconserved transcriptomic response to hPTH(1-34).** For each specific transcript significantly regulated in each tissue the z ratio (hPTH(1-34) compared to vehicle control) is indicated.

| <b>Gene Symbol</b> | <b>Aorta</b> | <b>Bone</b> | <b>Heart</b> | <b>Kidney</b> | <b>Liver</b> | <b>Lung</b> |
|--------------------|--------------|-------------|--------------|---------------|--------------|-------------|
| 2610507B11Rik      | -1.75        |             | -1.57        |               |              | -1.54       |
| 9030025P20Rik      |              | 1.6         |              |               |              | 1.55        |
| Acadl              | -1.69        |             |              |               |              | -2.12       |
| Afg3l1             |              |             |              |               | 3.02         | 1.57        |
| Aplp2              |              | 2.57        | 1.94         |               |              |             |
| Atp6v1h            | -1.91        |             |              |               |              | -4.19       |
| Bace2              | 2.75         |             |              |               | 2.35         | 1.58        |
| Bgn                |              | 3.15        |              |               |              | 2.75        |
| Bnip3l             | -2.31        |             |              |               |              | -2.74       |
| C1qtnf2            | 2.55         |             | 3.81         |               | 3.32         |             |
| Ccdc41             |              |             |              |               | -3.37        | -2.06       |
| Cd163              |              |             | -2.24        |               |              | -1.55       |
| Cnot11             |              | -1.75       |              |               |              | -1.78       |
| Cox17              | -3.2         | -3.98       |              |               |              |             |
| Cpt1b              | -2.83        |             | -2.44        |               |              |             |
| Cutc               |              |             |              |               | -2.07        | -1.83       |
| Cyb5r3             | 2.69         |             |              |               | 1.81         |             |
| D3Ucla1            | -1.6         |             |              |               | -3.03        | -2.7        |
| Dars               |              | 1.75        |              |               |              | 2.44        |
| Ddx24              |              | 1.63        |              |               |              | 2.1         |
| Dnajc15            | -2.75        | -2.48       |              |               | -1.95        |             |
| Dnajc5             |              |             | 1.76         |               | 2.42         |             |
| Eftud2             |              |             | 2.08         |               |              | 1.98        |
| Eif4e3             | -2.42        | -1.92       |              |               | -2.15        |             |
| Ensa               |              |             | -2.73        |               |              | -1.55       |
| Fcgrt              |              | 1.99        |              |               | 2.48         |             |
| Fnta               | -1.77        |             |              |               |              | -1.68       |
| Fpgs               | 2.06         |             |              |               |              | 3.14        |
| Hsd3b7             |              | 2.15        |              |               |              | 2.61        |
| Igf2r              |              |             |              |               | -3.51        | -2          |
| Ipmk               |              |             |              |               | -2.12        | -2.68       |
| Itm2b              |              |             |              |               | -3.02        | -2.01       |
| Ivns1abp           | -1.92        |             |              |               |              | -3.8        |
| Klf2               |              |             | -4.94        |               |              | -4.34       |
| Lims2              | -1.86        |             |              |               |              | -3.42       |
| LOC100045617       |              |             |              |               | -4.01        | -2.03       |

|           |       |       |       |      |       |       |
|-----------|-------|-------|-------|------|-------|-------|
| LOC668492 |       | -2.53 | -2.08 |      |       | -2.13 |
| Mcee      | -2.38 | -2.84 |       |      | -3.4  |       |
| Mmab      |       |       |       | 2.66 |       | 3.83  |
| Mvd       |       |       |       |      | 2.07  | 6.71  |
| Ndufb2    |       | -4.86 | -2.6  |      |       |       |
| Ndufb6    | -3.67 | -2.18 |       |      |       |       |
| Ndufs4    | -2.07 | -3.47 |       |      | -3.1  |       |
| Nfatc4    | 1.72  |       | 1.97  |      |       |       |
| Nfkb1     | 1.95  | 1.95  |       |      |       |       |
| Pdha1     | -3.78 |       |       |      |       | -1.76 |
| Plekhg3   |       | -1.65 |       |      |       | -2.65 |
| Ppm1a     | -1.67 |       |       |      |       | -2.63 |
| Prdx3     | -3.21 |       |       |      | -2.68 |       |
| Psen2     |       |       |       |      | 1.87  | 3.27  |
| Psip1     |       |       |       |      | -3.29 | -1.68 |
| Rab1      |       | 2.75  |       |      |       | 3.34  |
| Rnps1     |       |       |       |      | 2.98  | 2.88  |
| Rshl2a    |       |       |       |      | -3.07 | -1.96 |
| Serf2     |       | -2.64 |       |      |       | -1.71 |
| Slc22a5   |       |       | -2.62 |      |       | -2.93 |
| Styx      |       | -1.81 |       |      |       | -2.05 |
| Tm9sf4    |       |       |       |      | -2.12 | -1.63 |
| Tmem223   | -2.01 |       |       |      |       | -1.68 |
| Tmem38b   | -1.56 |       |       |      |       | -2.04 |
| Xdh       | -1.82 |       |       |      |       | -3.04 |

**Table S3. KEGG pathway enrichment for superconserved hPTH(1-34)-induced significant transcript regulation.** For each described pathway the number of total whole murine genome background genes included in the pathway is indicated (C). The number of transcripts observed (O) in the input dataset that populated the specific KEGG pathway is indicated, as well as the number expected by chance from the background expression frequency (E) in the genome. The degree of KEGG pathway enrichment (R) is then calculated from O/E. The probability of this enrichment is denoted by P. The hybrid score (H) is a combinatorial measure of both R and P (*i.e.*  $-\log_{10}(P) * R$ ).

| KEGG Pathway                      | C    | O  | E    | R     | P        | H        |
|-----------------------------------|------|----|------|-------|----------|----------|
| Metabolic pathways                | 1184 | 13 | 1.15 | 11.34 | 1.12E-09 | 101.5019 |
| Oxidative phosphorylation         | 147  | 5  | 0.14 | 35.14 | 2.21E-06 | 198.7381 |
| Alzheimer's disease               | 188  | 5  | 0.18 | 27.48 | 4.98E-06 | 145.7201 |
| Parkinson's disease               | 148  | 3  | 0.14 | 20.94 | 0.0013   | 60.43403 |
| Huntington's disease              | 197  | 3  | 0.19 | 15.73 | 0.0022   | 41.80369 |
| Fatty acid metabolism             | 48   | 2  | 0.05 | 43.05 | 0.0022   | 114.4087 |
| MAPK signaling pathway            | 268  | 3  | 0.26 | 11.57 | 0.0036   | 28.27358 |
| PPAR signaling pathway            | 80   | 2  | 0.08 | 25.83 | 0.0036   | 63.12071 |
| B cell receptor signaling pathway | 76   | 2  | 0.07 | 27.19 | 0.0036   | 66.44414 |
| Adipocytokine signaling pathway   | 68   | 2  | 0.07 | 30.39 | 0.0036   | 74.26397 |
| T cell receptor signaling pathway | 110  | 2  | 0.11 | 18.79 | 0.0061   | 41.61365 |
| Lysosome                          | 123  | 2  | 0.12 | 16.8  | 0.0069   | 36.30734 |
| Neurotrophin signaling pathway    | 131  | 2  | 0.13 | 15.77 | 0.0072   | 33.78987 |

**Table S4. KEGG pathway enrichment for superconserved bPTH(7-34)-induced significant transcript regulation.** For each described pathway the number of total whole murine genome background genes included in the pathway is indicated (C). The number of transcripts observed (O) in the input dataset that populated the specific KEGG pathway is indicated, as well as the number expected by chance from the background expression frequency (E) in the genome. The degree of KEGG pathway enrichment (R) is then calculated from O/E. The probability of this enrichment is denoted by P. The hybrid score (H) is a combinatorial measure of both R and P (*i.e.*  $-\log_{10}(P) * R$ ).

| <b>KEGG Pathway</b>                         | <b>C</b> | <b>O</b> | <b>E</b> | <b>R</b> | <b>P</b> | <b>H</b> |
|---------------------------------------------|----------|----------|----------|----------|----------|----------|
| Pathways in cancer                          | 325      | 10       | 0.61     | 16.48    | 4.02E-08 | 121.8824 |
| Prostate cancer                             | 89       | 6        | 0.17     | 36.12    | 5.83E-07 | 225.1841 |
| MAPK signaling pathway                      | 268      | 8        | 0.5      | 15.99    | 9.30E-07 | 96.44396 |
| Apoptosis                                   | 86       | 5        | 0.16     | 31.15    | 9.87E-06 | 155.927  |
| GnRH signaling pathway                      | 99       | 5        | 0.18     | 27.06    | 1.59E-05 | 129.8502 |
| Endometrial cancer                          | 52       | 4        | 0.1      | 41.21    | 3.00E-05 | 186.3878 |
| Cell cycle                                  | 127      | 5        | 0.24     | 21.09    | 3.88E-05 | 93.03154 |
| Neurotrophin signaling pathway              | 131      | 5        | 0.24     | 20.45    | 3.94E-05 | 90.0721  |
| Insulin signaling pathway                   | 137      | 5        | 0.26     | 19.55    | 4.37E-05 | 85.22859 |
| Long-term potentiation                      | 69       | 4        | 0.13     | 31.06    | 5.60E-05 | 132.0613 |
| TGF-beta signaling pathway                  | 85       | 4        | 0.16     | 25.21    | 0.0001   | 100.84   |
| Vasopressin-regulated water reabsorption    | 43       | 3        | 0.08     | 37.38    | 0.0004   | 127.015  |
| Amoebiasis                                  | 116      | 4        | 0.22     | 18.47    | 0.0004   | 62.75995 |
| Leukocyte transendothelial migration        | 120      | 4        | 0.22     | 17.86    | 0.0004   | 60.68721 |
| Vascular smooth muscle contraction          | 123      | 4        | 0.23     | 17.42    | 0.0004   | 59.19211 |
| Natural killer cell mediated cytotoxicity   | 125      | 4        | 0.23     | 17.14    | 0.0004   | 58.24069 |
| Toxoplasmosis                               | 127      | 4        | 0.24     | 16.87    | 0.0004   | 57.32325 |
| Non-small cell lung cancer                  | 55       | 3        | 0.1      | 29.22    | 0.0007   | 92.18624 |
| Jak-STAT signaling pathway                  | 153      | 4        | 0.29     | 14.01    | 0.0007   | 44.20018 |
| Colorectal cancer                           | 65       | 3        | 0.12     | 24.73    | 0.0008   | 76.58658 |
| Pancreatic cancer                           | 71       | 3        | 0.13     | 22.64    | 0.0008   | 70.11404 |
| Renal cell carcinoma                        | 71       | 3        | 0.13     | 22.64    | 0.0008   | 70.11404 |
| Protein processing in endoplasmic reticulum | 169      | 4        | 0.32     | 12.68    | 0.0008   | 39.26882 |

**Table S5. Wikipathways enrichment for superconserved hPTH(1-34)-induced significant transcript regulation.** For each described pathway the number of transcripts observed (O) in the input dataset that populated the specific KEGG pathway is indicated, as well as the number expected by chance from the background expression frequency (E) in the genome. The degree of KEGG pathway enrichment (R) is then calculated from O/E. The probability of this enrichment is denoted by P. The hybrid score (H) is a combinatorial measure of both R and P (*i.e.*  $-\log_{10}(P * R)$ ).

| <b>WikiPathway Description</b>         | <b>O</b> | <b>E</b> | <b>R</b> | <b>P</b> | <b>H</b> |
|----------------------------------------|----------|----------|----------|----------|----------|
| Electron Transport Chain               | 4        | 0.1      | 40.52    | 3.12E-05 | 182.5769 |
| Oxidative phosphorylation              | 3        | 0.06     | 51.66    | 0.0001   | 206.64   |
| mRNA processing                        | 5        | 0.47     | 10.7     | 0.0003   | 37.6948  |
| Apoptosis                              | 2        | 0.09     | 22.22    | 0.0053   | 50.56659 |
| PPAR signaling pathway                 | 2        | 0.09     | 22.22    | 0.0053   | 50.56659 |
| Fatty Acid Beta Oxidation              | 2        | 0.07     | 29.95    | 0.0053   | 68.15794 |
| IL-2 Signaling Pathway                 | 2        | 0.09     | 22.46    | 0.0053   | 51.11276 |
| MicroRNAs in cardiomyocyte hypertrophy | 2        | 0.1      | 20.26    | 0.0056   | 45.62171 |
| MAPK signaling pathway                 | 2        | 0.16     | 12.52    | 0.0126   | 23.78336 |
| PluriNetWork                           | 2        | 0.28     | 7.08     | 0.0327   | 10.517   |



**Table S6. Wikipathways enrichment for superconserved bPTH(7-34)-induced significant transcript regulation.** For each described pathway the number of transcripts observed (O) in the input dataset that populated the specific KEGG pathway is indicated, as well as the number expected by chance from the background expression frequency (E) in the genome. The degree of KEGG pathway enrichment (R) is then calculated from O/E. The probability of this enrichment is denoted by P. The hybrid score (H) is a combinatorial measure of both R and P (*i.e.*  $-\log_{10}(P * R)$ ).

| WikiPathway Description                            | O  | E    | R     | P        | H        |
|----------------------------------------------------|----|------|-------|----------|----------|
| MAPK signaling pathway                             | 10 | 0.31 | 32.47 | 4.19E-11 | 336.9667 |
| Insulin Signaling                                  | 8  | 0.29 | 27.13 | 1.23E-08 | 214.6009 |
| Myometrial Relaxation and Contraction Pathways     | 8  | 0.29 | 27.13 | 1.23E-08 | 214.6009 |
| EGFR1 Signaling Pathway                            | 8  | 0.41 | 19.75 | 1.12E-07 | 137.2779 |
| Focal Adhesion                                     | 7  | 0.35 | 20.16 | 6.84E-07 | 124.2853 |
| TNF-alpha NF-kB Signaling Pathway                  | 7  | 0.4  | 17.44 | 1.53E-06 | 101.419  |
| Calcium Regulation in the Cardiac Cell             | 6  | 0.28 | 21.15 | 3.33E-06 | 115.8503 |
| Integrin-mediated cell adhesion                    | 5  | 0.19 | 26.79 | 8.61E-06 | 135.6913 |
| FAS pathway and Stress induction of HSP regulation | 4  | 0.1  | 42.02 | 1.49E-05 | 202.8227 |
| IL-6 signaling Pathway                             | 5  | 0.22 | 22.9  | 1.49E-05 | 110.534  |
| TGF-beta Receptor Signaling Pathway                | 6  | 0.45 | 13.39 | 2.98E-05 | 60.60024 |
| Apoptosis Modulation by HSP70                      | 3  | 0.04 | 69.88 | 4.63E-05 | 302.8892 |
| IL-4 signaling Pathway                             | 4  | 0.14 | 28.57 | 4.94E-05 | 123.0302 |
| PluriNetWork                                       | 6  | 0.55 | 11.01 | 7.10E-05 | 45.67765 |
| B Cell Receptor Signaling Pathway                  | 5  | 0.38 | 13.26 | 0.0001   | 53.04    |
| G Protein Signaling Pathways                       | 4  | 0.18 | 22.8  | 0.0001   | 91.2     |
| IL-3 Signaling Pathway                             | 4  | 0.21 | 19.31 | 0.0002   | 71.42711 |
| ESC Pluripotency Pathways                          | 4  | 0.23 | 17.42 | 0.0002   | 64.43606 |
| Senescence and Autophagy                           | 4  | 0.2  | 19.66 | 0.0002   | 72.72175 |
| ErbB signaling pathway                             | 3  | 0.11 | 27.24 | 0.0005   | 89.92006 |
| Fatty Acid Beta Oxidation                          | 3  | 0.13 | 23.29 | 0.0007   | 73.47767 |
| Kit Receptor Signaling Pathway                     | 3  | 0.13 | 22.96 | 0.0007   | 72.43655 |
| Endochondral Ossification                          | 3  | 0.13 | 23.99 | 0.0007   | 75.6861  |
| Mitochondrial LC-Fatty Acid Beta-Oxidation         | 2  | 0.03 | 66.97 | 0.0008   | 207.4001 |
| Type II interferon signaling (IFNG)                | 3  | 0.14 | 21.72 | 0.0008   | 67.26489 |
| IL-1 Signaling Pathway                             | 3  | 0.15 | 19.6  | 0.001    | 58.8     |
| Hypertrophy Model                                  | 2  | 0.04 | 53.58 | 0.0011   | 158.5222 |
| IL-2 Signaling Pathway                             | 3  | 0.17 | 17.47 | 0.0012   | 51.0267  |
| Alpha6-Beta4 Integrin Signaling Pathway            | 3  | 0.17 | 17.86 | 0.0012   | 52.16582 |
| Apoptosis                                          | 3  | 0.17 | 17.28 | 0.0012   | 50.47175 |
| Wnt Signaling Pathway and Pluripotency             | 3  | 0.18 | 16.57 | 0.0013   | 47.82196 |
| MAPK Cascade                                       | 2  | 0.06 | 35.72 | 0.0024   | 93.57885 |

|                                                  |   |      |       |        |          |
|--------------------------------------------------|---|------|-------|--------|----------|
| Androgen Receptor Signaling Pathway              | 3 | 0.24 | 12.76 | 0.0026 | 32.98494 |
| Toll Like Receptor signaling                     | 2 | 0.07 | 28.96 | 0.0033 | 71.86384 |
| Signaling of Hepatocyte Growth Factor Receptor   | 2 | 0.07 | 28.2  | 0.0034 | 69.61229 |
| Translation Factors                              | 2 | 0.09 | 21.43 | 0.0057 | 48.0916  |
| Chemokine signaling pathway                      | 3 | 0.35 | 8.64  | 0.0071 | 18.56513 |
| Splicing factor NOVA regulated synaptic proteins | 2 | 0.11 | 18.47 | 0.0071 | 39.68726 |
| TGF Beta Signaling Pathway                       | 2 | 0.11 | 18.16 | 0.0072 | 38.91084 |
| Wnt Signaling Pathway                            | 2 | 0.11 | 17.57 | 0.0073 | 37.54142 |
| Proteasome Degradation                           | 2 | 0.11 | 17.86 | 0.0073 | 38.16105 |
| G1 to S cell cycle control                       | 2 | 0.12 | 16.48 | 0.008  | 34.55708 |
| Alzheimers Disease                               | 2 | 0.14 | 13.92 | 0.0109 | 27.31902 |
| IL-5 Signaling Pathway                           | 2 | 0.15 | 13.39 | 0.0115 | 25.96726 |
| estrogen signalling                              | 2 | 0.16 | 12.32 | 0.0131 | 23.19522 |
| PPAR signaling pathway                           | 2 | 0.17 | 11.52 | 0.0146 | 21.14666 |
| Cell cycle                                       | 2 | 0.18 | 11.05 | 0.0155 | 19.99683 |
| MicroRNAs in cardiomyocyte hypertrophy           | 2 | 0.19 | 10.5  | 0.0167 | 18.66148 |
| Delta-Notch Signaling Pathway                    | 2 | 0.21 | 9.65  | 0.0189 | 16.63214 |
| Toll-like receptor signaling pathway             | 2 | 0.21 | 9.74  | 0.0189 | 16.78726 |
| T Cell Receptor Signaling Pathway                | 2 | 0.27 | 7.49  | 0.0295 | 11.46103 |

**Table S7. Ingenuity Canonical signaling pathway enrichment for superconserved hPTH(1-34)-induced significant transcript regulation.** For each described Canonical signaling pathway the  $-\log_{10}$  transform of the enrichment probability is given. In addition the enrichment ratio is also given for each significantly-populated signaling pathway.

| <b>Ingenuity Canonical Pathway</b>                                   | <b><math>-\log(p\text{-value})</math></b> | <b>Ratio</b> |
|----------------------------------------------------------------------|-------------------------------------------|--------------|
| Mitochondrial Dysfunction                                            | 1.05E+01                                  | 5.85E-02     |
| Oxidative Phosphorylation                                            | 3.65E+00                                  | 3.67E-02     |
| April Mediated Signaling                                             | 2.31E+00                                  | 5.26E-02     |
| B Cell Activating Factor Signaling                                   | 2.27E+00                                  | 5.00E-02     |
| Amyloid Processing                                                   | 2.07E+00                                  | 3.92E-02     |
| Wnt/Ca+ pathway                                                      | 1.99E+00                                  | 3.57E-02     |
| PPAR $\alpha$ /RXR $\alpha$ Activation                               | 1.89E+00                                  | 1.68E-02     |
| Regulation of IL-2 Expression in Activated and Anergic T Lymphocytes | 1.70E+00                                  | 2.53E-02     |
| T Cell Receptor Signaling                                            | 1.54E+00                                  | 2.06E-02     |
| Glucocorticoid Receptor Signaling                                    | 1.46E+00                                  | 1.15E-02     |
| fMLP Signaling in Neutrophils                                        | 1.45E+00                                  | 1.85E-02     |
| iCOS-iCOSL Signaling in T Helper Cells                               | 1.45E+00                                  | 1.85E-02     |
| CD28 Signaling in T Helper Cells                                     | 1.38E+00                                  | 1.69E-02     |
| PKC $\theta$ Signaling in T Lymphocytes                              | 1.38E+00                                  | 1.69E-02     |
| PTEN Signaling                                                       | 1.38E+00                                  | 1.69E-02     |
| D-myo-inositol (1,4,5,6)-Tetrakisphosphate Biosynthesis              | 1.32E+00                                  | 1.57E-02     |
| D-myo-inositol (3,4,5,6)-tetrakisphosphate Biosynthesis              | 1.32E+00                                  | 1.57E-02     |
| PI3K Signaling in B Lymphocytes                                      | 1.32E+00                                  | 1.56E-02     |

**Table S8. Ingenuity Canonical signaling pathway enrichment for superconserved bPTH(7-34)-induced significant transcript regulation.** For each described Canonical signaling pathway the  $-\log_{10}$  transform of the enrichment probability is given. In addition the enrichment ratio is also given for each significantly-populated signaling pathway.

| <b>Ingenuity Canonical Pathway</b>                                             | <b><math>-\log(p\text{-value})</math></b> | <b>Ratio</b> |
|--------------------------------------------------------------------------------|-------------------------------------------|--------------|
| Molecular Mechanisms of Cancer                                                 | 1.03E+01                                  | 4.38E-02     |
| IGF-1 Signaling                                                                | 1.02E+01                                  | 1.03E-01     |
| IL-8 Signaling                                                                 | 9.77E+00                                  | 6.56E-02     |
| PPAR $\alpha$ /RXR $\alpha$ Activation                                         | 8.70E+00                                  | 6.15E-02     |
| Huntington's Disease Signaling                                                 | 8.63E+00                                  | 5.22E-02     |
| ERK/MAPK Signaling                                                             | 7.37E+00                                  | 5.35E-02     |
| Aldosterone Signaling in Epithelial Cells                                      | 7.06E+00                                  | 5.92E-02     |
| Protein Kinase A Signaling                                                     | 7.05E+00                                  | 3.37E-02     |
| P2Y Purigenic Receptor Signaling Pathway                                       | 6.75E+00                                  | 6.72E-02     |
| Prostate Cancer Signaling                                                      | 6.68E+00                                  | 8.54E-02     |
| NF- $\kappa$ B Signaling                                                       | 6.58E+00                                  | 5.20E-02     |
| Role of NFAT in Cardiac Hypertrophy                                            | 6.45E+00                                  | 5.03E-02     |
| Myc Mediated Apoptosis Signaling                                               | 6.29E+00                                  | 1.03E-01     |
| eNOS Signaling                                                                 | 6.19E+00                                  | 5.67E-02     |
| ERK5 Signaling                                                                 | 6.08E+00                                  | 9.52E-02     |
| Neurotrophin/TRK Signaling                                                     | 5.92E+00                                  | 8.96E-02     |
| Melatonin Signaling                                                            | 5.80E+00                                  | 8.57E-02     |
| Prolactin Signaling                                                            | 5.70E+00                                  | 8.22E-02     |
| FLT3 Signaling in Hematopoietic Progenitor Cells                               | 5.66E+00                                  | 8.11E-02     |
| Cardiac Hypertrophy Signaling                                                  | 5.66E+00                                  | 4.04E-02     |
| p38 MAPK Signaling                                                             | 5.63E+00                                  | 5.98E-02     |
| HER-2 Signaling in Breast Cancer                                               | 5.59E+00                                  | 7.89E-02     |
| Synaptic Long Term Potentiation                                                | 5.58E+00                                  | 5.88E-02     |
| p70S6K Signaling                                                               | 5.58E+00                                  | 5.88E-02     |
| CREB Signaling in Neurons                                                      | 5.55E+00                                  | 4.68E-02     |
| NRF2-mediated Oxidative Stress Response                                        | 5.39E+00                                  | 4.44E-02     |
| ErbB Signaling                                                                 | 5.28E+00                                  | 6.98E-02     |
| Insulin Receptor Signaling                                                     | 5.23E+00                                  | 5.22E-02     |
| Neuregulin Signaling                                                           | 5.22E+00                                  | 6.82E-02     |
| G Beta Gamma Signaling                                                         | 5.22E+00                                  | 6.82E-02     |
| Tumoricidal Function of Hepatic Natural Killer Cells                           | 5.19E+00                                  | 1.67E-01     |
| Leukocyte Extravasation Signaling                                              | 5.08E+00                                  | 4.04E-02     |
| Tec Kinase Signaling                                                           | 4.77E+00                                  | 4.43E-02     |
| Pancreatic Adenocarcinoma Signaling                                            | 4.75E+00                                  | 5.66E-02     |
| Germ Cell-Sertoli Cell Junction Signaling                                      | 4.73E+00                                  | 4.37E-02     |
| NGF Signaling                                                                  | 4.73E+00                                  | 5.61E-02     |
| Dopamine-DARPP32 Feedback in cAMP Signaling                                    | 4.71E+00                                  | 4.35E-02     |
| Fc Epsilon RI Signaling                                                        | 4.68E+00                                  | 5.50E-02     |
| Role of Macrophages, Fibroblasts and Endothelial Cells in Rheumatoid Arthritis | 4.64E+00                                  | 3.02E-02     |
| Growth Hormone Signaling                                                       | 4.56E+00                                  | 7.25E-02     |

|                                                                       |          |          |
|-----------------------------------------------------------------------|----------|----------|
| Endothelin-1 Signaling                                                | 4.55E+00 | 4.09E-02 |
| Colorectal Cancer Metastasis Signaling                                | 4.53E+00 | 3.39E-02 |
| 14-3-3-mediated Signaling                                             | 4.51E+00 | 5.13E-02 |
| PI3K/AKT Signaling                                                    | 4.39E+00 | 4.88E-02 |
| ILK Signaling                                                         | 4.31E+00 | 3.76E-02 |
| mTOR Signaling                                                        | 4.28E+00 | 3.72E-02 |
| GNRH Signaling                                                        | 4.27E+00 | 4.65E-02 |
| Thrombin Signaling                                                    | 4.24E+00 | 3.66E-02 |
| Hepatic Fibrosis / Hepatic Stellate Cell Activation                   | 4.15E+00 | 3.55E-02 |
| Melanocyte Development and Pigmentation Signaling                     | 4.14E+00 | 5.95E-02 |
| FGF Signaling                                                         | 4.12E+00 | 5.88E-02 |
| Virus Entry via Endocytic Pathways                                    | 4.02E+00 | 5.62E-02 |
| Death Receptor Signaling                                              | 3.96E+00 | 5.43E-02 |
| Cell Cycle: G2/M DNA Damage Checkpoint Regulation                     | 3.94E+00 | 8.16E-02 |
| Glioma Signaling                                                      | 3.89E+00 | 5.26E-02 |
| Endometrial Cancer Signaling                                          | 3.84E+00 | 7.69E-02 |
| Gap Junction Signaling                                                | 3.83E+00 | 3.87E-02 |
| Nitric Oxide Signaling in the Cardiovascular System                   | 3.81E+00 | 5.05E-02 |
| UVB-Induced MAPK Signaling                                            | 3.80E+00 | 7.55E-02 |
| Neuropathic Pain Signaling In Dorsal Horn Neurons                     | 3.78E+00 | 5.00E-02 |
| Lymphotoxin $\beta$ Receptor Signaling                                | 3.77E+00 | 7.41E-02 |
| Thrombopoietin Signaling                                              | 3.74E+00 | 7.27E-02 |
| Glioma Invasiveness Signaling                                         | 3.68E+00 | 7.02E-02 |
| Sphingosine-1-phosphate Signaling                                     | 3.61E+00 | 4.59E-02 |
| Gas Signaling                                                         | 3.61E+00 | 4.59E-02 |
| ErbB4 Signaling                                                       | 3.59E+00 | 6.67E-02 |
| Corticotropin Releasing Hormone Signaling                             | 3.57E+00 | 4.50E-02 |
| Androgen Signaling                                                    | 3.57E+00 | 4.50E-02 |
| B Cell Receptor Signaling                                             | 3.53E+00 | 3.41E-02 |
| Dendritic Cell Maturation                                             | 3.49E+00 | 3.35E-02 |
| IL-6 Signaling                                                        | 3.48E+00 | 4.31E-02 |
| Production of Nitric Oxide and Reactive Oxygen Species in Macrophages | 3.48E+00 | 3.33E-02 |
| Non-Small Cell Lung Cancer Signaling                                  | 3.46E+00 | 6.15E-02 |
| PTEN Signaling                                                        | 3.45E+00 | 4.24E-02 |
| Angiopoietin Signaling                                                | 3.43E+00 | 6.06E-02 |
| Regulation of the Epithelial-Mesenchymal Transition Pathway           | 3.43E+00 | 3.26E-02 |
| Clathrin-mediated Endocytosis Signaling                               | 3.42E+00 | 3.24E-02 |
| HMGB1 Signaling                                                       | 3.42E+00 | 4.17E-02 |
| Axonal Guidance Signaling                                             | 3.41E+00 | 2.08E-02 |
| Erythropoietin Signaling                                              | 3.41E+00 | 5.97E-02 |
| Glucocorticoid Receptor Signaling                                     | 3.40E+00 | 2.68E-02 |
| Macropinocytosis Signaling                                            | 3.38E+00 | 5.88E-02 |
| Breast Cancer Regulation by Stathmin1                                 | 3.34E+00 | 3.14E-02 |
| Small Cell Lung Cancer Signaling                                      | 3.31E+00 | 5.63E-02 |
| PI3K Signaling in B Lymphocytes                                       | 3.29E+00 | 3.91E-02 |
| LPS-stimulated MAPK Signaling                                         | 3.27E+00 | 5.48E-02 |
| NF- $\kappa$ B Activation by Viruses                                  | 3.27E+00 | 5.48E-02 |
| Leptin Signaling in Obesity                                           | 3.25E+00 | 5.41E-02 |

|                                                            |          |          |
|------------------------------------------------------------|----------|----------|
| Cytotoxic T Lymphocyte-mediated Apoptosis of Target Cells  | 3.23E+00 | 9.38E-02 |
| AMPK Signaling                                             | 3.20E+00 | 3.73E-02 |
| IL-12 Signaling and Production in Macrophages              | 3.18E+00 | 3.70E-02 |
| Acute Myeloid Leukemia Signaling                           | 3.18E+00 | 5.19E-02 |
| TWEAK Signaling                                            | 3.16E+00 | 8.82E-02 |
| GPCR-Mediated Nutrient Sensing in Enteroendocrine Cells    | 3.04E+00 | 4.76E-02 |
| Regulation of eIF4 and p70S6K Signaling                    | 3.03E+00 | 3.42E-02 |
| Gαq Signaling                                              | 3.02E+00 | 3.40E-02 |
| HIPPO signaling                                            | 3.00E+00 | 4.65E-02 |
| Docosahexaenoic Acid (DHA) Signaling                       | 2.98E+00 | 7.69E-02 |
| α-Adrenergic Signaling                                     | 2.98E+00 | 4.60E-02 |
| TGF-β Signaling                                            | 2.98E+00 | 4.60E-02 |
| CXCR4 Signaling                                            | 2.95E+00 | 3.29E-02 |
| Role of PKR in Interferon Induction and Antiviral Response | 2.95E+00 | 7.50E-02 |
| Mechanisms of Viral Exit from Host Cells                   | 2.92E+00 | 7.32E-02 |
| IL-1 Signaling                                             | 2.91E+00 | 4.40E-02 |
| Factors Promoting Cardiogenesis in Vertebrates             | 2.89E+00 | 4.35E-02 |
| UVC-Induced MAPK Signaling                                 | 2.89E+00 | 7.14E-02 |
| Chronic Myeloid Leukemia Signaling                         | 2.87E+00 | 4.30E-02 |
| Phospholipase C Signaling                                  | 2.84E+00 | 2.51E-02 |
| MSP-RON Signaling Pathway                                  | 2.77E+00 | 6.52E-02 |
| Tight Junction Signaling                                   | 2.77E+00 | 2.99E-02 |
| Cholecystokinin/Gastrin-mediated Signaling                 | 2.74E+00 | 3.96E-02 |
| Protein Ubiquitination Pathway                             | 2.70E+00 | 2.35E-02 |
| TNFR1 Signaling                                            | 2.69E+00 | 6.12E-02 |
| Ephrin Receptor Signaling                                  | 2.69E+00 | 2.87E-02 |
| G-Protein Coupled Receptor Signaling                       | 2.69E+00 | 2.34E-02 |
| HGF Signaling                                              | 2.68E+00 | 3.81E-02 |
| RAR Activation                                             | 2.67E+00 | 2.84E-02 |
| fMLP Signaling in Neutrophils                              | 2.63E+00 | 3.70E-02 |
| Renin-Angiotensin Signaling                                | 2.62E+00 | 3.67E-02 |
| Natural Killer Cell Signaling                              | 2.61E+00 | 3.64E-02 |
| Type I Diabetes Mellitus Signaling                         | 2.61E+00 | 3.64E-02 |
| Role of Tissue Factor in Cancer                            | 2.61E+00 | 3.64E-02 |
| Unfolded protein response                                  | 2.57E+00 | 5.56E-02 |
| Xenobiotic Metabolism Signaling                            | 2.56E+00 | 2.21E-02 |
| Wnt/Ca+ pathway                                            | 2.53E+00 | 5.36E-02 |
| CCR3 Signaling in Eosinophils                              | 2.51E+00 | 3.42E-02 |
| Type II Diabetes Mellitus Signaling                        | 2.51E+00 | 3.42E-02 |
| Nur77 Signaling in T Lymphocytes                           | 2.50E+00 | 5.26E-02 |
| Sperm Motility                                             | 2.47E+00 | 3.33E-02 |
| Estrogen-Dependent Breast Cancer Signaling                 | 2.40E+00 | 4.84E-02 |
| Antiproliferative Role of Somatostatin Receptor 2          | 2.38E+00 | 4.76E-02 |
| Calcium-induced T Lymphocyte Apoptosis                     | 2.36E+00 | 4.69E-02 |
| Pyridoxal 5'-phosphate Salvage Pathway                     | 2.36E+00 | 4.69E-02 |
| CD40 Signaling                                             | 2.34E+00 | 4.62E-02 |
| Hypoxia Signaling in the Cardiovascular System             | 2.34E+00 | 4.62E-02 |
| Ovarian Cancer Signaling                                   | 2.33E+00 | 3.05E-02 |

|                                                                              |          |          |
|------------------------------------------------------------------------------|----------|----------|
| Endoplasmic Reticulum Stress Pathway                                         | 2.29E+00 | 9.52E-02 |
| Relaxin Signaling                                                            | 2.29E+00 | 2.96E-02 |
| CCR5 Signaling in Macrophages                                                | 2.27E+00 | 4.35E-02 |
| IL-3 Signaling                                                               | 2.24E+00 | 4.23E-02 |
| Renal Cell Carcinoma Signaling                                               | 2.24E+00 | 4.23E-02 |
| Epithelial Adherens Junction Signaling                                       | 2.17E+00 | 2.74E-02 |
| VEGF Family Ligand-Receptor Interactions                                     | 2.15E+00 | 3.95E-02 |
| Signaling by Rho Family GTPases                                              | 2.15E+00 | 2.14E-02 |
| VDR/RXR Activation                                                           | 2.12E+00 | 3.85E-02 |
| Hepatic Cholestasis                                                          | 2.01E+00 | 2.47E-02 |
| FAK Signaling                                                                | 1.99E+00 | 3.45E-02 |
| UVA-Induced MAPK Signaling                                                   | 1.98E+00 | 3.41E-02 |
| Acute Phase Response Signaling                                               | 1.95E+00 | 2.37E-02 |
| VEGF Signaling                                                               | 1.94E+00 | 3.30E-02 |
| Mitochondrial Dysfunction                                                    | 1.93E+00 | 2.34E-02 |
| RhoGDI Signaling                                                             | 1.92E+00 | 2.31E-02 |
| Fcγ Receptor-mediated Phagocytosis in Macrophages and Monocytes              | 1.92E+00 | 3.23E-02 |
| Circadian Rhythm Signaling                                                   | 1.91E+00 | 6.06E-02 |
| Salvage Pathways of Pyrimidine Ribonucleotides                               | 1.89E+00 | 3.16E-02 |
| Sertoli Cell-Sertoli Cell Junction Signaling                                 | 1.87E+00 | 2.25E-02 |
| Calcium Signaling                                                            | 1.87E+00 | 2.25E-02 |
| Role of JAK2 in Hormone-like Cytokine Signaling                              | 1.86E+00 | 5.71E-02 |
| p53 Signaling                                                                | 1.85E+00 | 3.06E-02 |
| Telomerase Signaling                                                         | 1.84E+00 | 3.03E-02 |
| HIF1α Signaling                                                              | 1.81E+00 | 2.94E-02 |
| Paxillin Signaling                                                           | 1.81E+00 | 2.94E-02 |
| FcγRIIB Signaling in B Lymphocytes                                           | 1.73E+00 | 4.88E-02 |
| Integrin Signaling                                                           | 1.69E+00 | 1.98E-02 |
| Role of IL-17F in Allergic Inflammatory Airway Diseases                      | 1.67E+00 | 4.55E-02 |
| iNOS Signaling                                                               | 1.67E+00 | 4.55E-02 |
| Role of RIG1-like Receptors in Antiviral Innate Immunity                     | 1.65E+00 | 4.44E-02 |
| CD28 Signaling in T Helper Cells                                             | 1.64E+00 | 2.54E-02 |
| nNOS Signaling in Neurons                                                    | 1.62E+00 | 4.26E-02 |
| Ephrin A Signaling                                                           | 1.60E+00 | 4.17E-02 |
| Role of Osteoblasts, Osteoclasts and Chondrocytes in Rheumatoid Arthritis    | 1.58E+00 | 1.83E-02 |
| Role of Pattern Recognition Receptors in Recognition of Bacteria and Viruses | 1.56E+00 | 2.36E-02 |
| Cellular Effects of Sildenafil (Viagra)                                      | 1.54E+00 | 2.33E-02 |
| CD27 Signaling in Lymphocytes                                                | 1.53E+00 | 3.85E-02 |
| CNTF Signaling                                                               | 1.53E+00 | 3.85E-02 |
| IL-2 Signaling                                                               | 1.52E+00 | 3.77E-02 |
| Cardiac β-adrenergic Signaling                                               | 1.51E+00 | 2.26E-02 |
| Role of IL-17A in Arthritis                                                  | 1.50E+00 | 3.70E-02 |
| Human Embryonic Stem Cell Pluripotency                                       | 1.50E+00 | 2.24E-02 |
| EGF Signaling                                                                | 1.48E+00 | 3.57E-02 |
| ErbB2-ErbB3 Signaling                                                        | 1.46E+00 | 3.51E-02 |
| Aryl Hydrocarbon Receptor Signaling                                          | 1.45E+00 | 2.14E-02 |
| Synaptic Long Term Depression                                                | 1.44E+00 | 2.13E-02 |
| ATM Signaling                                                                | 1.43E+00 | 3.39E-02 |

|                                                             |          |          |
|-------------------------------------------------------------|----------|----------|
| Induction of Apoptosis by HIV1                              | 1.42E+00 | 3.33E-02 |
| Glioblastoma Multiforme Signaling                           | 1.41E+00 | 2.05E-02 |
| GM-CSF Signaling                                            | 1.39E+00 | 3.23E-02 |
| Role of JAK1 and JAK3 in $\gamma$ c Cytokine Signaling      | 1.38E+00 | 3.17E-02 |
| Retinoic acid Mediated Apoptosis Signaling                  | 1.37E+00 | 3.12E-02 |
| Cell Cycle: G1/S Checkpoint Regulation                      | 1.37E+00 | 3.12E-02 |
| Role of PI3K/AKT Signaling in the Pathogenesis of Influenza | 1.35E+00 | 3.03E-02 |
| 3-phosphoinositide Biosynthesis                             | 1.34E+00 | 1.94E-02 |
| GDNF Family Ligand-Receptor Interactions                    | 1.32E+00 | 2.94E-02 |
| Remodeling of Epithelial Adherens Junctions                 | 1.32E+00 | 2.94E-02 |



**Table S9. Transcription Factor (TF) target enrichment for superconserved hPTH(1-34)-induced significant transcript regulation.** For each described TF target (murine database) the number of total whole murine genome background TFs included in the target group is indicated (C). The number of targets observed (O) in the input dataset that populated the specific TF target group is indicated, as well as the number expected by chance from the background expression frequency (E) in the genome. The degree of TF target enrichment (R) is then calculated from O/E. The probability of this enrichment is denoted by P. The hybrid score (H) is a combinatorial measure of both R and P (*i.e.*  $-\log_{10}(P) * R$ ).

| Transcription Factor Target  | C    | O  | E    | R     | P      | H        |
|------------------------------|------|----|------|-------|--------|----------|
| mmu_CACGTG_V\$MYC_Q2         | 949  | 7  | 0.92 | 7.62  | 0.002  | 20.56615 |
| mmu_GGGCGGR_V\$SP1_Q6        | 2704 | 11 | 2.62 | 4.2   | 0.002  | 11.33567 |
| mmu_V\$USF_Q6_01             | 217  | 4  | 0.21 | 19.05 | 0.002  | 51.41538 |
| mmu_TGAYRTCA_V\$ATF3_Q6      | 487  | 5  | 0.47 | 10.61 | 0.0024 | 27.79596 |
| mmu_GGGAGGRR_V\$MAZ_Q6       | 2104 | 9  | 2.04 | 4.42  | 0.0039 | 10.64749 |
| mmu_RYTTCTCG_V\$ETS2_B       | 990  | 6  | 0.96 | 6.26  | 0.0065 | 13.69116 |
| mmu_CTTAAR_UNKNOWN           | 883  | 5  | 0.85 | 5.85  | 0.0087 | 12.05381 |
| mmu_V\$SP1_Q6                | 235  | 3  | 0.23 | 13.19 | 0.0087 | 27.17774 |
| mmu_V\$CREBP1CJUN_01         | 241  | 3  | 0.23 | 12.86 | 0.0087 | 26.49778 |
| mmu_V\$ATF1_Q6               | 219  | 3  | 0.21 | 14.15 | 0.0087 | 29.1558  |
| mmu_V\$PAX4_01               | 244  | 3  | 0.24 | 12.7  | 0.0087 | 26.16811 |
| mmu_TGACGTCA_V\$ATF3_Q6      | 213  | 3  | 0.21 | 14.55 | 0.0087 | 29.97999 |
| mmu_CTTTGA_V\$LEF1_Q2        | 1107 | 6  | 1.07 | 5.6   | 0.0087 | 11.53869 |
| mmu_V\$CREB_02               | 231  | 3  | 0.22 | 13.42 | 0.0087 | 27.65165 |
| mmu_AACTTT_UNKNOWN           | 1750 | 7  | 1.69 | 4.13  | 0.0087 | 8.509785 |
| mmu_V\$SP1_Q4_01             | 238  | 3  | 0.23 | 13.02 | 0.0087 | 26.82746 |
| mmu_V\$LMO2COM_01            | 241  | 3  | 0.23 | 12.86 | 0.0087 | 26.49778 |
| mmu_V\$CREB_01               | 242  | 3  | 0.23 | 12.81 | 0.0087 | 26.39476 |
| mmu_GCANCTGNY_V\$MYOD_Q6     | 854  | 5  | 0.83 | 6.05  | 0.0087 | 12.46591 |
| mmu_V\$CEBPB_01              | 247  | 3  | 0.24 | 12.55 | 0.0087 | 25.85903 |
| mmu_V\$IK2_01                | 255  | 3  | 0.25 | 12.16 | 0.0088 | 24.99509 |
| mmu_V\$USF_C                 | 257  | 3  | 0.25 | 12.06 | 0.0088 | 24.78954 |
| mmu_RYTGCNRRGNAAC_V\$MIF1_01 | 73   | 2  | 0.07 | 28.31 | 0.0097 | 56.99449 |
| mmu_GGCNRNWCTTYS_UNKNOWN     | 77   | 2  | 0.07 | 26.84 | 0.0105 | 53.11128 |
| mmu_TGACATY_UNKNOWN          | 602  | 4  | 0.58 | 6.87  | 0.0109 | 13.48288 |
| mmu_TGANTCA_V\$AP1_C         | 1041 | 5  | 1.01 | 4.96  | 0.0123 | 9.474071 |
| mmu_SCGGAAGY_V\$ELK1_02      | 1070 | 5  | 1.04 | 4.83  | 0.0137 | 8.99964  |
| mmu_AAAYRNCTG_UNKNOWN        | 337  | 3  | 0.33 | 9.2   | 0.0149 | 16.80669 |
| mmu_MGGAAGTG_V\$GABP_B       | 690  | 4  | 0.67 | 5.99  | 0.0151 | 10.90793 |
| mmu_CAGGTG_V\$E12_Q6         | 2292 | 7  | 2.22 | 3.16  | 0.02   | 5.368745 |
| mmu_TGGAAA_V\$NFAT_Q4_01     | 1718 | 6  | 1.66 | 3.61  | 0.02   | 6.133282 |

|                          |      |   |      |       |        |          |
|--------------------------|------|---|------|-------|--------|----------|
| mmu_WWTAAGGC_UNKNOWN     | 131  | 2 | 0.13 | 15.77 | 0.0218 | 26.20254 |
| mmu_V\$STAT_Q6           | 242  | 2 | 0.23 | 8.54  | 0.029  | 13.13112 |
| mmu_V\$MYCMAX_B          | 240  | 2 | 0.23 | 8.61  | 0.029  | 13.23875 |
| mmu_V\$MZF1_Q2           | 220  | 2 | 0.21 | 9.39  | 0.029  | 14.43808 |
| mmu_V\$E2A_Q2            | 218  | 2 | 0.21 | 9.48  | 0.029  | 14.57647 |
| mmu_V\$LEF1_Q6           | 240  | 2 | 0.23 | 8.61  | 0.029  | 13.23875 |
| mmu_V\$NFAT_Q6           | 228  | 2 | 0.22 | 9.06  | 0.029  | 13.93067 |
| mmu_V\$ATF3_Q6           | 230  | 2 | 0.22 | 8.98  | 0.029  | 13.80767 |
| mmu_V\$AP4_Q5            | 251  | 2 | 0.24 | 8.23  | 0.029  | 12.65446 |
| mmu_V\$CREB_Q4_01        | 196  | 2 | 0.19 | 10.54 | 0.029  | 16.20633 |
| mmu_V\$SP1_Q6_01         | 226  | 2 | 0.22 | 9.14  | 0.029  | 14.05368 |
| mmu_V\$MYC_Q2            | 172  | 2 | 0.17 | 12.01 | 0.029  | 18.4666  |
| mmu_V\$AREB6_Q4          | 235  | 2 | 0.23 | 8.79  | 0.029  | 13.51552 |
| mmu_V\$E47_Q1            | 229  | 2 | 0.22 | 9.02  | 0.029  | 13.86917 |
| mmu_V\$CETS1P54_01       | 229  | 2 | 0.22 | 9.02  | 0.029  | 13.86917 |
| mmu_V\$GCM_Q2            | 219  | 2 | 0.21 | 9.44  | 0.029  | 14.51496 |
| mmu_V\$SP3_Q3            | 230  | 2 | 0.22 | 8.98  | 0.029  | 13.80767 |
| mmu_V\$MYCMAX_Q3         | 230  | 2 | 0.22 | 8.98  | 0.029  | 13.80767 |
| mmu_V\$AP1_Q6_01         | 246  | 2 | 0.24 | 8.4   | 0.029  | 12.91586 |
| mmu_V\$ETS1_B            | 236  | 2 | 0.23 | 8.76  | 0.029  | 13.46939 |
| mmu_V\$CREB_Q4           | 250  | 2 | 0.24 | 8.27  | 0.029  | 12.71597 |
| mmu_V\$NFY_C             | 221  | 2 | 0.21 | 9.35  | 0.029  | 14.37658 |
| mmu_V\$SREBP_Q3          | 235  | 2 | 0.23 | 8.79  | 0.029  | 13.51552 |
| mmu_V\$MEIS1_Q1          | 224  | 2 | 0.22 | 9.23  | 0.029  | 14.19207 |
| mmu_GTGACGY_V\$E4F1_Q6   | 595  | 3 | 0.58 | 5.21  | 0.029  | 8.010906 |
| mmu_V\$ATF_Q1            | 239  | 2 | 0.23 | 8.65  | 0.029  | 13.30026 |
| mmu_V\$CDX2_Q5           | 231  | 2 | 0.22 | 8.95  | 0.029  | 13.76154 |
| mmu_V\$CP2_Q1            | 247  | 2 | 0.24 | 8.37  | 0.029  | 12.86973 |
| mmu_V\$USF2_Q6           | 234  | 2 | 0.23 | 8.83  | 0.029  | 13.57703 |
| mmu_V\$E47_Q2            | 233  | 2 | 0.23 | 8.87  | 0.029  | 13.63853 |
| mmu_V\$AP4_Q6_01         | 237  | 2 | 0.23 | 8.72  | 0.029  | 13.40789 |
| mmu_V\$MIF1_Q1           | 162  | 2 | 0.16 | 12.76 | 0.029  | 19.6198  |
| mmu_V\$NFY_Q1            | 236  | 2 | 0.23 | 8.76  | 0.029  | 13.46939 |
| mmu_V\$ATF4_Q2           | 243  | 2 | 0.24 | 8.5   | 0.029  | 13.06962 |
| mmu_V\$CREB_Q2_01        | 205  | 2 | 0.2  | 10.08 | 0.029  | 15.49903 |
| mmu_CAGCTG_V\$AP4_Q5     | 1387 | 5 | 1.34 | 3.72  | 0.029  | 5.719879 |
| mmu_V\$RORA1_Q1          | 228  | 2 | 0.22 | 9.06  | 0.029  | 13.93067 |
| mmu_V\$MYCMAX_Q2         | 246  | 2 | 0.24 | 8.4   | 0.029  | 12.91586 |
| mmu_GATTGGY_V\$NFY_Q6_01 | 1059 | 4 | 1.02 | 3.9   | 0.029  | 5.996648 |
| mmu_V\$ARNT_Q2           | 230  | 2 | 0.22 | 8.98  | 0.029  | 13.80767 |
| mmu_V\$STAT6_Q2          | 241  | 2 | 0.23 | 8.57  | 0.029  | 13.17725 |

|                            |     |   |      |       |        |          |
|----------------------------|-----|---|------|-------|--------|----------|
| mmu_V\$CEBPB_02            | 245 | 2 | 0.24 | 8.43  | 0.029  | 12.96198 |
| mmu_V\$MYOD_Q6_01          | 239 | 2 | 0.23 | 8.65  | 0.029  | 13.30026 |
| mmu_V\$NRF2_01             | 248 | 2 | 0.24 | 8.33  | 0.029  | 12.80822 |
| mmu_V\$CART1_01            | 203 | 2 | 0.2  | 10.18 | 0.029  | 15.65279 |
| mmu_V\$USF_01              | 235 | 2 | 0.23 | 8.79  | 0.029  | 13.51552 |
| mmu_V\$ER_Q6_01            | 240 | 2 | 0.23 | 8.61  | 0.029  | 13.23875 |
| mmu_V\$DR4_Q2              | 236 | 2 | 0.23 | 8.76  | 0.029  | 13.46939 |
| mmu_V\$MSX1_01             | 162 | 2 | 0.16 | 12.76 | 0.029  | 19.6198  |
| mmu_V\$ATF_B               | 176 | 2 | 0.17 | 11.74 | 0.029  | 18.05145 |
| mmu_V\$MYOD_01             | 242 | 2 | 0.23 | 8.54  | 0.029  | 13.13112 |
| mmu_V\$RFX1_01             | 227 | 2 | 0.22 | 9.1   | 0.029  | 13.99218 |
| mmu_V\$CEBP_Q2_01          | 256 | 2 | 0.25 | 8.07  | 0.0297 | 12.32486 |
| mmu_V\$E4F1_Q6             | 261 | 2 | 0.25 | 7.92  | 0.0301 | 12.04975 |
| mmu_TGCCAAR_V\$NF1_Q6      | 665 | 3 | 0.64 | 4.66  | 0.0301 | 7.08988  |
| mmu_YGCGYRCGC_UNKNOWN      | 293 | 2 | 0.28 | 7.05  | 0.0367 | 10.1191  |
| mmu_TTCYNRGAA_V\$STAT5B_01 | 311 | 2 | 0.3  | 6.64  | 0.0405 | 9.246499 |
| mmu_CATTGTYY_V\$SOX9_B1    | 333 | 2 | 0.32 | 6.21  | 0.0452 | 8.35159  |

**Table S10. Transcription Factor (TF) target enrichment for superconserved bPTH(7-34)-induced significant transcript regulation.** For each described TF target (murine database) the number of total whole murine genome background TFs included in the target group is indicated (C). The number of targets observed (O) in the input dataset that populated the specific TF target group is indicated, as well as the number expected by chance from the background expression frequency (E) in the genome. The degree of TF target enrichment (R) is then calculated from O/E. The probability of this enrichment is denoted by P. The hybrid score (H) is a combinatorial measure of both R and P (*i.e.*  $-\log_{10}(P) * R$ ).

| Transcription Factor Target | C    | O  | E    | R     | P        | H        |
|-----------------------------|------|----|------|-------|----------|----------|
| mmu_GGGCGGR_V\$SP1_Q6       | 2704 | 32 | 5.05 | 6.34  | 5.72E-15 | 90.29811 |
| mmu_MGGAAGTG_V\$GABP_B      | 690  | 12 | 1.29 | 9.32  | 1.14E-06 | 55.38965 |
| mmu_GCCATNTTG_V\$YY1_Q6     | 393  | 9  | 0.73 | 12.27 | 2.40E-06 | 68.95481 |
| mmu_CTTTGT_V\$LEF1_Q2       | 1814 | 17 | 3.39 | 5.02  | 2.40E-06 | 28.21134 |
| mmu_GGGTGGRR_V\$PAX4_Q3     | 1207 | 14 | 2.25 | 6.21  | 2.40E-06 | 34.89889 |
| mmu_RCGCANGCGY_V\$NRF1_Q6   | 835  | 12 | 1.56 | 7.7   | 2.40E-06 | 43.27237 |
| mmu_CAGGTG_V\$E12_Q6        | 2292 | 19 | 4.28 | 4.44  | 2.40E-06 | 24.95186 |
| mmu_CACGTG_V\$MYC_Q2        | 949  | 13 | 1.77 | 7.34  | 2.40E-06 | 41.24925 |
| mmu_GGGAGGRR_V\$MAZ_Q6      | 2104 | 18 | 3.93 | 4.58  | 2.44E-06 | 25.70575 |
| mmu_SCGGAAGY_V\$ELK1_Q2     | 1070 | 13 | 2    | 6.51  | 3.15E-06 | 35.816   |
| mmu_TTCYRGAA_UNKNOWN        | 302  | 8  | 0.56 | 14.19 | 3.15E-06 | 78.06897 |
| mmu_V\$USF_Q2               | 250  | 7  | 0.47 | 15    | 1.28E-05 | 73.39185 |
| mmu_CTTTAAR_UNKNOWN         | 883  | 11 | 1.65 | 6.67  | 1.98E-05 | 31.37124 |
| mmu_GTGGGTGK_UNKNOWN        | 273  | 7  | 0.51 | 13.74 | 1.98E-05 | 64.62382 |
| mmu_WGGAATGY_V\$TEF1_Q6     | 345  | 7  | 0.64 | 10.87 | 8.65E-05 | 44.16463 |
| mmu_V\$USF_Q1               | 235  | 6  | 0.44 | 13.68 | 9.50E-05 | 55.02474 |
| mmu_AACTTT_UNKNOWN          | 1750 | 14 | 3.27 | 4.29  | 9.50E-05 | 17.25557 |
| mmu_V\$MAX_Q1               | 236  | 6  | 0.44 | 13.62 | 9.50E-05 | 54.7834  |
| mmu_V\$TATA_Q1              | 236  | 6  | 0.44 | 13.62 | 9.50E-05 | 54.7834  |
| mmu_RNGTGGGC_UNKNOWN        | 710  | 9  | 1.33 | 6.79  | 0.0001   | 27.16    |
| mmu_V\$SREBP1_Q1            | 161  | 5  | 0.3  | 16.64 | 0.0002   | 61.55086 |
| mmu_TAATTA_V\$CHX10_Q1      | 735  | 9  | 1.37 | 6.56  | 0.0002   | 24.26524 |
| mmu_TGGAAG_V\$NFAT_Q4_Q1    | 1718 | 13 | 3.21 | 4.05  | 0.0003   | 14.26766 |
| mmu_TTGTTT_V\$FOXO4_Q1      | 1879 | 13 | 3.51 | 3.71  | 0.0006   | 11.95306 |
| mmu_V\$VDR_Q3               | 206  | 5  | 0.38 | 13    | 0.0006   | 41.88403 |
| mmu_V\$IK1_Q1               | 258  | 5  | 0.48 | 10.38 | 0.0007   | 32.74788 |
| mmu_V\$GR_Q6_Q1             | 243  | 5  | 0.45 | 11.02 | 0.0007   | 34.76702 |
| mmu_V\$AR_Q6                | 228  | 5  | 0.43 | 11.75 | 0.0007   | 37.0701  |
| mmu_RGAANN TTC_V\$HSF1_Q1   | 408  | 6  | 0.76 | 7.88  | 0.0007   | 24.86063 |
| mmu_V\$ELK1_Q2              | 227  | 5  | 0.42 | 11.8  | 0.0007   | 37.22784 |
| mmu_V\$USF_Q6               | 242  | 5  | 0.45 | 11.07 | 0.0007   | 34.92476 |

|                          |      |    |      |       |        |          |
|--------------------------|------|----|------|-------|--------|----------|
| mmu_V\$USF_Q6_01         | 217  | 5  | 0.41 | 12.34 | 0.0007 | 38.93149 |
| mmu_V\$ARNT_01           | 232  | 5  | 0.43 | 11.55 | 0.0007 | 36.43912 |
| mmu_RYTTCTG_V\$ETS2_B    | 990  | 9  | 1.85 | 4.87  | 0.0007 | 15.36437 |
| mmu_V\$TITF1_Q3          | 223  | 5  | 0.42 | 12.01 | 0.0007 | 37.89037 |
| mmu_ATCMNTCCGY_UNKNOWN   | 48   | 3  | 0.09 | 33.48 | 0.0007 | 105.6261 |
| mmu_V\$OLF1_01           | 251  | 5  | 0.47 | 10.67 | 0.0007 | 33.6628  |
| mmu_V\$ARNT_02           | 230  | 5  | 0.43 | 11.65 | 0.0007 | 36.75461 |
| mmu_V\$ZIC1_01           | 238  | 5  | 0.44 | 11.26 | 0.0007 | 35.5242  |
| mmu_V\$NFMUE1_Q6         | 223  | 5  | 0.42 | 12.01 | 0.0007 | 37.89037 |
| mmu_TATAAA_V\$TATA_01    | 1166 | 10 | 2.18 | 4.59  | 0.0007 | 14.481   |
| mmu_V\$AML1_01           | 248  | 5  | 0.46 | 10.8  | 0.0007 | 34.07294 |
| mmu_V\$ALPHACP1_01       | 239  | 5  | 0.45 | 11.21 | 0.0007 | 35.36645 |
| mmu_V\$AML1_Q6           | 248  | 5  | 0.46 | 10.8  | 0.0007 | 34.07294 |
| mmu_V\$COUP_01           | 241  | 5  | 0.45 | 11.12 | 0.0007 | 35.08251 |
| mmu_GATTGGY_V\$NFY_Q6_01 | 1059 | 9  | 1.98 | 4.55  | 0.0013 | 13.13156 |
| mmu_ACAWNRNSRCGG_UNKNOWN | 57   | 3  | 0.11 | 28.2  | 0.0013 | 81.3868  |
| mmu_STTTCRNTTT_V\$IRF_Q6 | 176  | 4  | 0.33 | 12.18 | 0.0018 | 33.43078 |
| mmu_WGTTNNNNNAAA_UNKNOWN | 490  | 6  | 0.91 | 6.56  | 0.0018 | 18.00541 |
| mmu_V\$CREBP1_01         | 164  | 4  | 0.31 | 13.07 | 0.0018 | 35.87359 |
| mmu_CCGNMNNTNACG_UNKNOWN | 71   | 3  | 0.13 | 22.64 | 0.0018 | 62.14063 |
| mmu_YTAATTA V\$LHX3_01   | 173  | 4  | 0.32 | 12.39 | 0.0018 | 34.00717 |
| mmu_V\$PAX3_B            | 83   | 3  | 0.15 | 19.36 | 0.0029 | 49.12797 |
| mmu_V\$RREB1_01          | 191  | 4  | 0.36 | 11.22 | 0.0029 | 28.47189 |
| mmu_V\$E4BP4_01          | 205  | 4  | 0.38 | 10.45 | 0.0033 | 25.93153 |
| mmu_V\$SRF_Q5_01         | 204  | 4  | 0.38 | 10.5  | 0.0033 | 26.0556  |
| mmu_V\$CHX10_01          | 207  | 4  | 0.39 | 10.35 | 0.0033 | 25.68338 |
| mmu_V\$MTF1_Q4           | 227  | 4  | 0.42 | 9.44  | 0.0037 | 22.95618 |
| mmu_V\$E2F1_Q3_01        | 227  | 4  | 0.42 | 9.44  | 0.0037 | 22.95618 |
| mmu_V\$TEF_Q6            | 221  | 4  | 0.41 | 9.7   | 0.0037 | 23.58844 |
| mmu_V\$NFKB_Q6_01        | 223  | 4  | 0.42 | 9.61  | 0.0037 | 23.36958 |
| mmu_V\$CEBPDELTA_Q6      | 226  | 4  | 0.42 | 9.48  | 0.0037 | 23.05345 |
| mmu_V\$FOXJ2_02          | 213  | 4  | 0.4  | 10.06 | 0.0037 | 24.46389 |
| mmu_V\$SRF_Q6            | 227  | 4  | 0.42 | 9.44  | 0.0037 | 22.95618 |
| mmu_GTGACGY_V\$E4F1_Q6   | 595  | 6  | 1.11 | 5.4   | 0.0037 | 13.13171 |
| mmu_V\$CIZ_01            | 217  | 4  | 0.41 | 9.88  | 0.0037 | 24.02617 |
| mmu_TGANTCA_V\$AP1_C     | 1041 | 8  | 1.94 | 4.12  | 0.0037 | 10.01901 |
| mmu_V\$HP1SITEFACTOR_Q6  | 216  | 4  | 0.4  | 9.92  | 0.0037 | 24.12344 |
| mmu_V\$AP3_Q6            | 230  | 4  | 0.43 | 9.32  | 0.0037 | 22.66436 |
| mmu_V\$TEL2_Q6           | 219  | 4  | 0.41 | 9.79  | 0.0037 | 23.80731 |
| mmu_V\$IPF1_Q4           | 229  | 4  | 0.43 | 9.36  | 0.0037 | 22.76163 |
| mmu_V\$YY1_02            | 222  | 4  | 0.41 | 9.65  | 0.0037 | 23.46685 |

|                             |     |   |      |       |        |          |
|-----------------------------|-----|---|------|-------|--------|----------|
| mmu_V\$NFAT_Q6              | 228 | 4 | 0.43 | 9.4   | 0.0037 | 22.8589  |
| mmu_V\$YY1_Q6               | 225 | 4 | 0.42 | 9.52  | 0.0037 | 23.15072 |
| mmu_V\$MYCMAX_03            | 230 | 4 | 0.43 | 9.32  | 0.0037 | 22.66436 |
| mmu_V\$STAT_01              | 232 | 4 | 0.43 | 9.24  | 0.0038 | 22.3628  |
| mmu_V\$HNF4_01_B            | 232 | 4 | 0.43 | 9.24  | 0.0038 | 22.3628  |
| mmu_V\$DR1_Q3               | 236 | 4 | 0.44 | 9.08  | 0.0038 | 21.97556 |
| mmu_V\$CP2_02               | 236 | 4 | 0.44 | 9.08  | 0.0038 | 21.97556 |
| mmu_V\$SREBP_Q3             | 235 | 4 | 0.44 | 9.12  | 0.0038 | 22.07237 |
| mmu_V\$SP1_Q6               | 235 | 4 | 0.44 | 9.12  | 0.0038 | 22.07237 |
| mmu_V\$PAX_Q6               | 237 | 4 | 0.44 | 9.04  | 0.0039 | 21.77678 |
| mmu_TTAYRTAA_V\$E4BP4_01    | 240 | 4 | 0.45 | 8.93  | 0.0039 | 21.51179 |
| mmu_V\$HNF4_Q6              | 238 | 4 | 0.44 | 9     | 0.0039 | 21.68042 |
| mmu_V\$STAT6_01             | 239 | 4 | 0.45 | 8.97  | 0.0039 | 21.60815 |
| mmu_RTAAACA_V\$FREAC2_01    | 854 | 7 | 1.59 | 4.39  | 0.0039 | 10.57523 |
| mmu_V\$NFKB_Q6              | 240 | 4 | 0.45 | 8.93  | 0.0039 | 21.51179 |
| mmu_V\$FREAC2_01            | 239 | 4 | 0.45 | 8.97  | 0.0039 | 21.60815 |
| mmu_V\$HSF1_01              | 246 | 4 | 0.46 | 8.71  | 0.0041 | 20.79265 |
| mmu_V\$VDR_Q6               | 245 | 4 | 0.46 | 8.75  | 0.0041 | 20.88814 |
| mmu_V\$MYCMAX_02            | 246 | 4 | 0.46 | 8.71  | 0.0041 | 20.79265 |
| mmu_V\$AP2_Q6_01            | 250 | 4 | 0.47 | 8.57  | 0.0043 | 20.28118 |
| mmu_V\$MMEF2_Q6             | 253 | 4 | 0.47 | 8.47  | 0.0043 | 20.04452 |
| mmu_V\$CEBP_Q2_01           | 256 | 4 | 0.48 | 8.37  | 0.0046 | 19.56272 |
| mmu_CYTAGCAAY_UNKNOWN       | 129 | 3 | 0.24 | 12.46 | 0.006  | 27.68424 |
| mmu_WWTAAGGC_UNKNOWN        | 131 | 3 | 0.24 | 12.27 | 0.006  | 27.26208 |
| mmu_V\$AHRARNT_01           | 130 | 3 | 0.24 | 12.36 | 0.006  | 27.46205 |
| mmu_RGAGGAARY_V\$PU1_Q6     | 469 | 5 | 0.88 | 5.71  | 0.006  | 12.68676 |
| mmu_CCCNNGGAR_V\$OLF1_01    | 292 | 4 | 0.55 | 7.34  | 0.0072 | 15.72718 |
| mmu_TTCNRGNNTTC_V\$HSF_Q6   | 140 | 3 | 0.26 | 11.48 | 0.0074 | 24.46122 |
| mmu_V\$PPARG_01             | 41  | 2 | 0.08 | 26.13 | 0.0083 | 54.37449 |
| mmu_CRGAARNNNCGA_UNKNOWN    | 43  | 2 | 0.08 | 24.92 | 0.0091 | 50.86069 |
| mmu_WTGAAAT_UNKNOWN         | 548 | 5 | 1.02 | 4.89  | 0.0114 | 9.501735 |
| mmu_V\$ATF_B                | 176 | 3 | 0.33 | 9.13  | 0.0134 | 17.09953 |
| mmu_V\$HSF_Q6               | 180 | 3 | 0.34 | 8.93  | 0.014  | 16.55508 |
| mmu_CCAATNNSNNGCG_UNKNOWN   | 55  | 2 | 0.1  | 19.48 | 0.014  | 36.11343 |
| mmu_V\$AHR_01               | 60  | 2 | 0.11 | 17.86 | 0.0163 | 31.93033 |
| mmu_TCCCRNRTGC_UNKNOWN      | 192 | 3 | 0.36 | 8.37  | 0.0163 | 14.96399 |
| mmu_YTCCCRNAGGY_UNKNOWN     | 67  | 2 | 0.13 | 15.99 | 0.0201 | 27.1319  |
| mmu_V\$HIF1_Q3              | 210 | 3 | 0.39 | 7.65  | 0.0205 | 12.91508 |
| mmu_TGACGTCA_V\$ATF3_Q6     | 213 | 3 | 0.4  | 7.55  | 0.0212 | 12.63616 |
| mmu_RYAAAKNNNNNTTGW_UNKNOWN | 77  | 2 | 0.14 | 13.92 | 0.0216 | 23.1844  |
| mmu_V\$STAT5A_01            | 233 | 3 | 0.43 | 6.9   | 0.0216 | 11.49227 |

|                            |     |   |      |       |        |          |
|----------------------------|-----|---|------|-------|--------|----------|
| mmu_V\$E2F1_Q4_01          | 216 | 3 | 0.4  | 7.44  | 0.0216 | 12.39166 |
| mmu_V\$IRF1_Q6             | 241 | 3 | 0.45 | 6.67  | 0.0216 | 11.10919 |
| mmu_TAANNYSGCG_UNKNOWN     | 76  | 2 | 0.14 | 14.1  | 0.0216 | 23.4842  |
| mmu_V\$PAX4_Q3             | 231 | 3 | 0.43 | 6.96  | 0.0216 | 11.5922  |
| mmu_V\$CREBP1CJUN_01       | 241 | 3 | 0.45 | 6.67  | 0.0216 | 11.10919 |
| mmu_V\$COUP_DR1_Q6         | 225 | 3 | 0.42 | 7.14  | 0.0216 | 11.892   |
| mmu_V\$AP2_Q6              | 237 | 3 | 0.44 | 6.78  | 0.0216 | 11.2924  |
| mmu_TCANNTGAY_V\$SREBP1_01 | 437 | 4 | 0.82 | 4.9   | 0.0216 | 8.161177 |
| mmu_V\$PEA3_Q6             | 236 | 3 | 0.44 | 6.81  | 0.0216 | 11.34237 |
| mmu_V\$E2F_Q3_01           | 221 | 3 | 0.41 | 7.27  | 0.0216 | 12.10852 |
| mmu_V\$AP4_01              | 244 | 3 | 0.46 | 6.59  | 0.0216 | 10.97595 |
| mmu_V\$TFIIA_Q6            | 235 | 3 | 0.44 | 6.84  | 0.0216 | 11.39234 |
| mmu_V\$ISRE_01             | 232 | 3 | 0.43 | 6.93  | 0.0216 | 11.54224 |
| mmu_V\$ZIC2_01             | 226 | 3 | 0.42 | 7.11  | 0.0216 | 11.84203 |
| mmu_V\$SP3_Q3              | 230 | 3 | 0.43 | 6.99  | 0.0216 | 11.64217 |
| mmu_V\$ELK1_01             | 243 | 3 | 0.45 | 6.61  | 0.0216 | 11.00926 |
| mmu_V\$DR4_Q2              | 236 | 3 | 0.44 | 6.81  | 0.0216 | 11.34237 |
| mmu_V\$MYOGENIN_Q6         | 235 | 3 | 0.44 | 6.84  | 0.0216 | 11.39234 |
| mmu_V\$P300_01             | 231 | 3 | 0.43 | 6.96  | 0.0216 | 11.5922  |
| mmu_V\$P53_DECAMER_Q2      | 235 | 3 | 0.44 | 6.84  | 0.0216 | 11.39234 |
| mmu_GGGRMNNYCAT_UNKNOWN    | 78  | 2 | 0.15 | 13.74 | 0.0216 | 22.88461 |
| mmu_V\$SP1_Q2_01           | 234 | 3 | 0.44 | 6.87  | 0.0216 | 11.4423  |
| mmu_CTGCAGY_UNKNOWN        | 692 | 5 | 1.29 | 3.87  | 0.0216 | 6.445664 |
| mmu_V\$HMGIIY_Q6           | 231 | 3 | 0.43 | 6.96  | 0.0216 | 11.5922  |
| mmu_V\$CREB_01             | 242 | 3 | 0.45 | 6.64  | 0.0216 | 11.05923 |
| mmu_V\$SOX9_B1             | 216 | 3 | 0.4  | 7.44  | 0.0216 | 12.39166 |
| mmu_V\$AP1_01              | 244 | 3 | 0.46 | 6.59  | 0.0216 | 10.97595 |
| mmu_V\$HNF4_DR1_Q3         | 241 | 3 | 0.45 | 6.67  | 0.0216 | 11.10919 |
| mmu_V\$FOXO1_02            | 230 | 3 | 0.43 | 6.99  | 0.0216 | 11.64217 |
| mmu_V\$NERF_Q2             | 228 | 3 | 0.43 | 7.05  | 0.0216 | 11.7421  |
| mmu_V\$ETS_Q4              | 230 | 3 | 0.43 | 6.99  | 0.0216 | 11.64217 |
| mmu_V\$NFY_Q6              | 234 | 3 | 0.44 | 6.87  | 0.0216 | 11.4423  |
| mmu_V\$ELF1_Q6             | 226 | 3 | 0.42 | 7.11  | 0.0216 | 11.84203 |
| mmu_V\$NFKB_C              | 243 | 3 | 0.45 | 6.61  | 0.0216 | 11.00926 |
| mmu_V\$YY1_01              | 221 | 3 | 0.41 | 7.27  | 0.0216 | 12.10852 |
| mmu_V\$PPAR_DR1_Q2         | 240 | 3 | 0.45 | 6.7   | 0.0216 | 11.15916 |
| mmu_V\$SP1_Q4_01           | 238 | 3 | 0.44 | 6.75  | 0.0216 | 11.24244 |
| mmu_V\$CEBPA_01            | 230 | 3 | 0.43 | 6.99  | 0.0216 | 11.64217 |
| mmu_V\$PR_Q2               | 238 | 3 | 0.44 | 6.75  | 0.0216 | 11.24244 |
| mmu_V\$NFY_01              | 236 | 3 | 0.44 | 6.81  | 0.0216 | 11.34237 |
| mmu_TGACCTY_V\$ERR1_Q2     | 954 | 6 | 1.78 | 3.37  | 0.0216 | 5.612891 |

|                             |     |   |      |       |        |          |
|-----------------------------|-----|---|------|-------|--------|----------|
| mmu_V\$NFY_Q6_01            | 244 | 3 | 0.46 | 6.59  | 0.0216 | 10.97595 |
| mmu_V\$CREB_Q3              | 226 | 3 | 0.42 | 7.11  | 0.0216 | 11.84203 |
| mmu_V\$HNF4_01              | 248 | 3 | 0.46 | 6.48  | 0.022  | 10.7411  |
| mmu_V\$NFAT_Q4_01           | 247 | 3 | 0.46 | 6.51  | 0.022  | 10.79083 |
| mmu_V\$HAND1E47_01          | 246 | 3 | 0.46 | 6.53  | 0.022  | 10.82398 |
| mmu_V\$NRF2_01              | 248 | 3 | 0.46 | 6.48  | 0.022  | 10.7411  |
| mmu_V\$EGR1_01              | 252 | 3 | 0.47 | 6.38  | 0.0228 | 10.47638 |
| mmu_V\$COREBINDINGFACTOR_Q6 | 253 | 3 | 0.47 | 6.35  | 0.0229 | 10.41504 |
| mmu_WTTGKCTG_UNKNOWN        | 475 | 4 | 0.89 | 4.51  | 0.0233 | 7.363225 |
| mmu_V\$ER_Q6                | 256 | 3 | 0.48 | 6.28  | 0.0234 | 10.24132 |
| mmu_V\$USF_C                | 257 | 3 | 0.48 | 6.25  | 0.0236 | 10.1693  |
| mmu_TGAYRTCA_V\$ATF3_Q6     | 487 | 4 | 0.91 | 4.4   | 0.0249 | 7.056723 |
| mmu_V\$GATA1_05             | 265 | 3 | 0.49 | 6.07  | 0.0252 | 9.703499 |
| mmu_TGCGCANK_UNKNOWN        | 500 | 4 | 0.93 | 4.29  | 0.0269 | 6.736363 |
| mmu_GTTGNYNRRGNAAC_UNKNOWN  | 99  | 2 | 0.18 | 10.82 | 0.0272 | 16.93796 |
| mmu_V\$MEIS1AHOXA9_01       | 107 | 2 | 0.2  | 10.01 | 0.0313 | 15.0596  |
| mmu_GCGNNANTTCC_UNKNOWN     | 110 | 2 | 0.21 | 9.74  | 0.0329 | 14.44251 |
| mmu_V\$AR_Q2                | 115 | 2 | 0.21 | 9.32  | 0.0354 | 13.52329 |
| mmu_CCTNTMAGA_UNKNOWN       | 117 | 2 | 0.22 | 9.16  | 0.0364 | 13.18031 |
| mmu_TTCYNRGAA_V\$STAT5B_01  | 311 | 3 | 0.58 | 5.17  | 0.0368 | 7.414567 |
| mmu_V\$PPARA_02             | 120 | 2 | 0.22 | 8.93  | 0.0378 | 12.703   |
| mmu_V\$STAT5A_02            | 121 | 2 | 0.23 | 8.86  | 0.0381 | 12.573   |
| mmu_V\$PR_02                | 122 | 2 | 0.23 | 8.78  | 0.0384 | 12.42957 |
| mmu_GCANCTGNY_V\$MYOD_Q6    | 854 | 5 | 1.59 | 3.14  | 0.0387 | 4.434588 |
| mmu_V\$XBP1_01              | 124 | 2 | 0.23 | 8.64  | 0.0392 | 12.15401 |
| mmu_CATTGTYY_V\$SOX9_B1     | 333 | 3 | 0.62 | 4.83  | 0.0426 | 6.619952 |
| mmu_YNGTTNNNATT_UNKNOWN     | 340 | 3 | 0.63 | 4.73  | 0.0446 | 6.388646 |
| mmu_V\$PAX5_01              | 139 | 2 | 0.26 | 7.71  | 0.0475 | 10.20269 |
| mmu_GGGYGTGNY_UNKNOWN       | 618 | 4 | 1.15 | 3.47  | 0.0488 | 4.551183 |
| mmu_V\$OCT1_07              | 143 | 2 | 0.27 | 7.49  | 0.0495 | 9.777407 |



**Table S11. microRNA target enrichment for superconserved hPTH(1-34)-induced significant transcript regulation.** For each described microRNA target (murine database), the number of total whole murine genome background microRNAs included in the target group is indicated (C). The number of targets observed (O) in the input dataset that populated the specific microRNA target group is indicated, as well as the number expected by chance from the background expression frequency (E) in the genome. The degree of microRNA target enrichment (R) is then calculated from O/E. The probability of this enrichment is denoted by P. The hybrid score (H) is a combinatorial measure of both R and P (*i.e.*  $-\log_{10}(P) * R$ ).

| microRNA target                                            | C   | O | E    | R     | P      | H        |
|------------------------------------------------------------|-----|---|------|-------|--------|----------|
| mmu_ATCATGA,MIR-433                                        | 104 | 3 | 0.1  | 29.8  | 0.0024 | 78.0697  |
| mmu_ACTGTAG,MIR-139                                        | 118 | 3 | 0.11 | 26.27 | 0.0024 | 68.82185 |
| mmu_TGTATGA,MIR-485-3P                                     | 141 | 3 | 0.14 | 21.98 | 0.0032 | 54.8368  |
| mmu_GTATGAT,MIR-154,MIR-487                                | 65  | 2 | 0.06 | 31.79 | 0.0108 | 62.51746 |
| mmu_AGGAAGC,MIR-516-3P                                     | 114 | 2 | 0.11 | 18.13 | 0.0232 | 29.6337  |
| mmu_ATGAAGG,MIR-205                                        | 143 | 2 | 0.14 | 14.45 | 0.0232 | 23.6187  |
| mmu_GTGACTT,MIR-224                                        | 144 | 2 | 0.14 | 14.35 | 0.0232 | 23.45525 |
| mmu_TCTCTCC,MIR-185                                        | 117 | 2 | 0.11 | 17.66 | 0.0232 | 28.86548 |
| mmu_TCATCTC,MIR-143                                        | 140 | 2 | 0.14 | 14.76 | 0.0232 | 24.1254  |
| mmu_GTGCCAT,MIR-183                                        | 164 | 2 | 0.16 | 12.6  | 0.0266 | 19.84649 |
| mmu_AACTGGA,MIR-145                                        | 213 | 2 | 0.21 | 9.7   | 0.0312 | 14.6067  |
| mmu_TTTTGAG,MIR-373                                        | 209 | 2 | 0.2  | 9.89  | 0.0312 | 14.89281 |
| mmu_CACCAGC,MIR-138                                        | 199 | 2 | 0.19 | 10.38 | 0.0312 | 15.63068 |
| mmu_TGCTGCT,MIR-15A,MIR-16,MIR-15B,MIR-195,MIR-424,MIR-497 | 560 | 3 | 0.54 | 5.54  | 0.0312 | 8.342384 |
| mmu_CCTGCTG,MIR-214                                        | 223 | 2 | 0.22 | 9.27  | 0.0318 | 13.8825  |
| mmu_ATTCTTT,MIR-186                                        | 252 | 2 | 0.24 | 8.2   | 0.0374 | 11.70245 |
| mmu_CAGTGTT,MIR-141,MIR-200A                               | 295 | 2 | 0.29 | 7     | 0.0444 | 9.468319 |
| mmu_GTGCCAA,MIR-96                                         | 290 | 2 | 0.28 | 7.13  | 0.0444 | 9.644159 |

**Table S12. microRNA target enrichment for superconserved bPTH(7-34)-induced significant transcript regulation.** For each described microRNA target (murine database), the number of total whole murine genome background microRNAs included in the target group is indicated (C). The number of targets observed (O) in the input dataset that populated the specific microRNA target group is indicated, as well as the number expected by chance from the background expression frequency (E) in the genome. The degree of microRNA target enrichment (R) is then calculated from O/E. The probability of this enrichment is denoted by P. The hybrid score (H) is a combinatorial measure of both R and P (*i.e.*  $-\log_{10}(P) * R$ ).

| microRNA target                                            | C   | O | E    | R     | P      | H        |
|------------------------------------------------------------|-----|---|------|-------|--------|----------|
| mmu_TATTATA,MIR-374                                        | 267 | 6 | 0.5  | 12.04 | 0.0005 | 39.7444  |
| mmu_AAAGACA,MIR-511                                        | 185 | 5 | 0.35 | 14.48 | 0.0005 | 47.79891 |
| mmu_CAGTGTT,MIR-141,MIR-200A                               | 295 | 6 | 0.55 | 10.9  | 0.0005 | 35.98123 |
| mmu_TTGCCAA,MIR-182                                        | 307 | 6 | 0.57 | 10.47 | 0.0005 | 34.56178 |
| mmu_AAAGGGA,MIR-204,MIR-211                                | 209 | 5 | 0.39 | 12.82 | 0.0008 | 39.70239 |
| mmu_GTGCAAA,MIR-507                                        | 124 | 4 | 0.23 | 17.28 | 0.0012 | 50.47175 |
| mmu_GACTGTT,MIR-212,MIR-132                                | 149 | 4 | 0.28 | 14.38 | 0.0018 | 39.46918 |
| mmu_CCAGGTT,MIR-490                                        | 61  | 3 | 0.11 | 26.35 | 0.0018 | 72.32357 |
| mmu_CTAGGAA,MIR-384                                        | 62  | 3 | 0.12 | 25.92 | 0.0018 | 71.14334 |
| mmu_ATACCTC,MIR-202                                        | 173 | 4 | 0.32 | 12.39 | 0.0022 | 32.92738 |
| mmu_TGGTGCT,MIR-29A,MIR-29B,MIR-29C                        | 478 | 6 | 0.89 | 6.72  | 0.0022 | 17.85892 |
| mmu_TCTGATA,MIR-361                                        | 82  | 3 | 0.15 | 19.6  | 0.0033 | 48.63713 |
| mmu_TAATAAT,MIR-126                                        | 208 | 4 | 0.39 | 10.3  | 0.0036 | 25.17008 |
| mmu_AACTGGA,MIR-145                                        | 213 | 4 | 0.4  | 10.06 | 0.0037 | 24.46389 |
| mmu_GGCAGTG,MIR-324-3P                                     | 92  | 3 | 0.17 | 17.47 | 0.0037 | 42.48352 |
| mmu_ACTGTGA,MIR-27A,MIR-27B                                | 438 | 5 | 0.82 | 6.12  | 0.0061 | 13.55378 |
| mmu_CCTGTGA,MIR-513                                        | 116 | 3 | 0.22 | 13.86 | 0.0061 | 30.69533 |
| mmu_CAGTATT,MIR-200B,MIR-200C,MIR-429                      | 437 | 5 | 0.82 | 6.13  | 0.0061 | 13.57593 |
| mmu_ACATTCC,MIR-1,MIR-206                                  | 275 | 4 | 0.51 | 7.79  | 0.0071 | 16.7387  |
| mmu_ATGTAGC,MIR-221,MIR-222                                | 130 | 3 | 0.24 | 12.36 | 0.0071 | 26.55845 |
| mmu_TGCACTG,MIR-148A,MIR-152,MIR-148B                      | 278 | 4 | 0.52 | 7.71  | 0.0071 | 16.5668  |
| mmu_ACTACCT,MIR-196A,MIR-196B                              | 134 | 3 | 0.25 | 11.99 | 0.0075 | 25.47802 |
| mmu_GTGCAAT,MIR-25,MIR-32,MIR-92,MIR-363,MIR-367           | 290 | 4 | 0.54 | 7.39  | 0.0076 | 15.66079 |
| mmu_ACCATTT,MIR-522                                        | 149 | 3 | 0.28 | 10.79 | 0.0088 | 22.17903 |
| mmu_CACTGTG,MIR-128A,MIR-128B                              | 306 | 4 | 0.57 | 7     | 0.0088 | 14.38862 |
| mmu_TGCTGCT,MIR-15A,MIR-16,MIR-15B,MIR-195,MIR-424,MIR-497 | 560 | 5 | 1.05 | 4.78  | 0.0125 | 9.09677  |
| mmu_CCATCCA,MIR-432                                        | 52  | 2 | 0.1  | 20.61 | 0.0126 | 39.15136 |
| mmu_GGCACAT,MIR-455                                        | 56  | 2 | 0.1  | 19.13 | 0.0127 | 36.27423 |
| mmu_GTACAGG,MIR-486                                        | 55  | 2 | 0.1  | 19.48 | 0.0127 | 36.9379  |
| mmu_ACTGAAA,MIR-30A-3P,MIR-30E-3P                          | 181 | 3 | 0.34 | 8.88  | 0.0127 | 16.83822 |
| mmu_TGTGTGA,MIR-377                                        | 183 | 3 | 0.34 | 8.78  | 0.0127 | 16.6486  |

|                                       |     |   |      |       |        |          |
|---------------------------------------|-----|---|------|-------|--------|----------|
| mmu_GTGTGAG,MIR-342                   | 60  | 2 | 0.11 | 17.86 | 0.0136 | 33.335   |
| mmu_AAGCACA,MIR-218                   | 377 | 4 | 0.7  | 5.68  | 0.0136 | 10.6015  |
| mmu_AATGTGA,MIR-23A,MIR-23B           | 391 | 4 | 0.73 | 5.48  | 0.0146 | 10.05935 |
| mmu_GCAAGGA,MIR-502                   | 65  | 2 | 0.12 | 16.48 | 0.0149 | 30.10589 |
| mmu_GTGCCTT,MIR-506                   | 666 | 5 | 1.24 | 4.02  | 0.0184 | 6.975432 |
| mmu_ATGTAA,MIR-302C                   | 228 | 3 | 0.43 | 7.05  | 0.0191 | 12.11871 |
| mmu_TCTATGA,MIR-376A,MIR-376B         | 77  | 2 | 0.14 | 13.92 | 0.0191 | 23.92802 |
| mmu_GTTTGTT,MIR-495                   | 238 | 3 | 0.44 | 6.75  | 0.0201 | 11.45343 |
| mmu_AGGCACT,MIR-515-3P                | 81  | 2 | 0.15 | 13.23 | 0.0201 | 22.44872 |
| mmu_AGGTGCA,MIR-500                   | 86  | 2 | 0.16 | 12.46 | 0.0218 | 20.70283 |
| mmu_AACTGAC,MIR-223                   | 87  | 2 | 0.16 | 12.32 | 0.0218 | 20.47022 |
| mmu_ATTACAT,MIR-380-3P                | 92  | 2 | 0.17 | 11.65 | 0.0239 | 18.89166 |
| mmu_ATAGGAA,MIR-202                   | 95  | 2 | 0.18 | 11.28 | 0.0242 | 18.23056 |
| mmu_GTGTTGA,MIR-505                   | 95  | 2 | 0.18 | 11.28 | 0.0242 | 18.23056 |
| mmu_ACTTTAT,MIR-142-5P                | 274 | 3 | 0.51 | 5.87  | 0.0256 | 9.343631 |
| mmu_ACTGCAG,MIR-17-3P                 | 101 | 2 | 0.19 | 10.61 | 0.0261 | 16.79944 |
| mmu_ATCATGA,MIR-433                   | 104 | 2 | 0.19 | 10.3  | 0.0268 | 16.19021 |
| mmu_ATGCAGT,MIR-217                   | 106 | 2 | 0.2  | 10.11 | 0.0272 | 15.82651 |
| mmu_GCACCTT,MIR-18A,MIR-18B           | 108 | 2 | 0.2  | 9.92  | 0.0277 | 15.4506  |
| mmu_ATGTACA,MIR-493                   | 296 | 3 | 0.55 | 5.43  | 0.0282 | 8.415147 |
| mmu_AGGAAGC,MIR-516-3P                | 114 | 2 | 0.21 | 9.4   | 0.0295 | 14.38367 |
| mmu_TGCTTTG,MIR-330                   | 307 | 3 | 0.57 | 5.24  | 0.0297 | 8.002756 |
| mmu_AGCATTA,MIR-155                   | 118 | 2 | 0.22 | 9.08  | 0.0297 | 13.86737 |
| mmu_ACTGTAG,MIR-139                   | 118 | 2 | 0.22 | 9.08  | 0.0297 | 13.86737 |
| mmu_TTGCACT,MIR-130A,MIR-301,MIR-130B | 370 | 3 | 0.69 | 4.34  | 0.0452 | 5.836699 |
| mmu_ATGTTTC,MIR-494                   | 151 | 2 | 0.28 | 7.1   | 0.0452 | 9.548517 |
| mmu_CATGTAA,MIR-496                   | 160 | 2 | 0.3  | 6.7   | 0.0494 | 8.752029 |

**Table S13. KEGG pathway-based keystone factor analysis for hPTH(1-34) and bPTH(7-34) superconserved transcript datasets.** For both superconserved ligand-regulated datasets both 95<sup>th</sup> (p=0.05) and 99<sup>th</sup> (p=0.01) percentile cut-offs were employed to induce distinct levels of multidimensional keystone strength. Each identified transcript (denoted by the specific Gene Symbol) possesses at least a Cosine Similarity score of >0.1, indicating at least an implicit association with the input KEGG pathway interrogator term.

| <b>hPTH(1-34)<br/>p=0.01</b> | <b>hPTH(1-34)<br/>p=0.05</b> | <b>bPTH(7-34)<br/>p=0.01</b> | <b>bPTH(7-34)<br/>p=0.05</b> |
|------------------------------|------------------------------|------------------------------|------------------------------|
|                              |                              |                              |                              |
| atg9a                        | atg9a                        | scg2                         | scg2                         |
| lpin2                        | lpin2                        | nts                          | nts                          |
| pank2                        | pank2                        | maged1                       | maged1                       |
| capn5                        | capn5                        | gpr55                        | gpr55                        |
| vps54                        | vps54                        | ssh1                         | ssh1                         |
| fabp3                        | fabp3                        | pea15                        | pea15                        |
| nhlrc1                       | nhlrc1                       | gper                         | gper                         |
| atg5                         | atg5                         | ptprs                        | ptprs                        |
| asmd                         | asmd                         | zfp36                        | zfp36                        |
| afg3l2                       | afg3l2                       | ptpn9                        | ptpn9                        |
| epm2a                        | epm2a                        | nr4a1                        | nr4a1                        |
| ppt1                         | ppt1                         | mtnr1a                       | mtnr1a                       |
| spast                        | spast                        | rap1gap                      | rap1gap                      |
| pabpn1                       | pabpn1                       | prex1                        | prex1                        |
| dars2                        | dars2                        | mok                          | mok                          |
| tor1a                        | tor1a                        | gdf15                        | gdf15                        |
| usp30                        | usp30                        | igfbp7                       | igfbp7                       |
| coq2                         | coq2                         | gipc1                        | gipc1                        |
| mrps27                       | mrps27                       | fgf7                         | fgf7                         |
| dnm1l                        | dnm1l                        | il11                         | il11                         |
| kiaa1549l                    | kiaa1549l                    | pdlim7                       | pdlim7                       |
| atg4a                        | atg4a                        | frk                          | frk                          |
| trappc5                      | trappc5                      | dok4                         | dok4                         |
| acyp2                        | acyp2                        | metrnl                       | metrnl                       |
| atg7                         | atg7                         | arhgap4                      | arhgap4                      |
| fxn                          | fxn                          | appl1                        | appl1                        |
| kiaa0226                     | kiaa0226                     | insrr                        | insrr                        |
| psmc4                        | psmc4                        | eef2                         | eef2                         |
| cln3                         | cln3                         | atf3                         | atf3                         |
| oit3                         | oit3                         | eef2k                        | eef2k                        |
| serf2                        | serf2                        | mzb1                         | mzb1                         |

|          |          |          |          |
|----------|----------|----------|----------|
| fastkd3  | fastkd3  | ptpro    | ptpro    |
| fastkd1  | fastkd1  | zhx2     | zhx2     |
| fastkd5  | fastkd5  | arhgdia  | arhgdia  |
| ppp2r4   | ppp2r4   | pla2g4c  | pla2g4c  |
| rca1     | rca1     | pik3r5   | pik3r5   |
| abcd4    | abcd4    | mmd2     | mmd2     |
| pex11b   | pex11b   | nuak2    | nuak2    |
| cyp4f22  | cyp4f22  | neu3     | neu3     |
| them5    | them5    | ptprh    | ptprh    |
| cisd1    | cisd1    | prkd3    | prkd3    |
| tfam     | tfam     | wisp2    | wisp2    |
| oxct1    | oxct1    | nisch    | nisch    |
| slc25a1  | slc25a1  | hspd1    | hspd1    |
| dgke     | dgke     | rgs16    | rgs16    |
| pnpla8   | pnpla8   | egfl6    | egfl6    |
| arhgap20 | arhgap20 | gpr68    | gpr68    |
| plin4    | plin4    | nuak1    | nuak1    |
| dgat1    | dgat1    | trib2    | trib2    |
| sc5d     | sc5d     | map4k4   | map4k4   |
| rarres2  | rarres2  | cdon     | cdon     |
| plin2    | plin2    | nupr1    | nupr1    |
| dgat2    | dgat2    | ptpn12   | ptpn12   |
| bscl2    | bscl2    | enpp2    | enpp2    |
| dync1h1  | dync1h1  | rmdn3    | rmdn3    |
| slc2a13  | slc2a13  | sgms1    | sgms1    |
| b3galt4  | b3galt4  | txnip    | txnip    |
| map1b    | map1b    | stk25    | stk25    |
| thtpa    | thtpa    | pik3c2a  | pik3c2a  |
|          | ndufv2   | ralgapa2 | ralgapa2 |
|          | mfsd12   | aebp1    | aebp1    |
|          | nd6      | camk2n2  | camk2n2  |
|          | nat8l    | ppm1f    | ppm1f    |
|          | pdss1    | gnb2l1   | gnb2l1   |
|          | acadm    | rit1     | rit1     |
|          | gdf15    | iqgap1   | iqgap1   |
|          | bp3      | trpm7    | trpm7    |
|          | bp2      | ndrg4    | ndrg4    |
|          | mir5691  | pggt1b   | pggt1b   |
|          | bai3     | fabp5    | fabp5    |
|          | bp4      | chn2     | chn2     |
|          | bmnd2    | clic4    | clic4    |

|  |          |         |         |
|--|----------|---------|---------|
|  | pee1     | ddr2    | ddr2    |
|  | capn10   | tdgf1   | tdgf1   |
|  | fabp2    | tm4sf5  | tm4sf5  |
|  | slc25a29 | rasl11b | rasl11b |
|  | scd      | thsd1   | thsd1   |
|  | mir605   | npnt    | npnt    |
|  | plin1    | fhl3    | fhl3    |
|  | pnpla3   | has1    | has1    |
|  | ffar1    | naa15   | naa15   |
|  | atg12    | fnta    | fnta    |
|  | atg14    | foxq1   | foxq1   |
|  | map1lc3a | nrep    | nrep    |
|  | nbr1     | stc1    | stc1    |
|  | atg16l2  | c1qtnf4 | c1qtnf4 |
|  | hdac6    | asb15   | asb15   |
|  | becn1    | il24    | il24    |
|  | als7     |         | map2k3  |
|  | sumf1    |         | srcin1  |
|  | tbce     |         | rin1    |
|  | ctns     |         | mapk7   |
|  | tuba1b   |         | tsc2    |
|  | gcdh     |         | prkci   |
|  | rnaseh2a |         | alox15  |
|  | ndufs7   |         | alox12  |
|  | pcmt1    |         | grpr    |
|  | dhrs4l2  |         | rps6ka2 |
|  | ndufa7   |         | rps6ka3 |
|  | trni     |         | acvr1c  |
|  | slc33a1  |         | igfbp6  |
|  | ndufaf6  |         | id1     |
|  | sdim1    |         | klf10   |
|  | hexb     |         | nmu     |
|  | b3galt1  |         | ereg    |
|  | msrb2    |         | prok1   |
|  | arfgap1  |         | prokr1  |
|  | gigyf2   |         | axl     |
|  | psma7    |         | shc4    |
|  | slc25a18 |         | vav2    |
|  | psmc1    |         | cxcl14  |
|  | cnbp     |         | rala    |
|  | thap1    |         | csk     |

|  |         |  |          |
|--|---------|--|----------|
|  | enoph1  |  | pik3cb   |
|  | snx33   |  | ralbp1   |
|  | wars    |  | prkch    |
|  | fig4    |  | serpinf1 |
|  | coq7    |  | arhgap5  |
|  | chchd4  |  | pik3r2   |
|  | btd     |  | retnlb   |
|  | msra    |  | fer      |
|  | opa1    |  | yes1     |
|  | galc    |  | ralgds   |
|  | stard4  |  | dusp6    |
|  | gba     |  | crk      |
|  | klc1    |  | tiam1    |
|  | mcoln1  |  | rasgrp3  |
|  | hmgcl   |  | akap12   |
|  | msrb1   |  | stmn1    |
|  | ndufa1  |  | lpar2    |
|  | psap    |  | plce1    |
|  | alkbh7  |  | ptn      |
|  | vdac1   |  | rhob     |
|  | hgsnat  |  | mdk      |
|  | znf334  |  | lpar1    |
|  | naglu   |  | btg2     |
|  | b3galt2 |  | klf4     |
|  | c1orf85 |  | lrrc4    |
|  | pus10   |  | etv1     |
|  | gbe1    |  | artn     |
|  | atp10d  |  | fstl1    |
|  | ndufs2  |  | dab2     |
|  | gaa     |  | sulf1    |
|  | mtmr6   |  | wisp1    |
|  | slc19a3 |  | cyr61    |
|  | ccz1    |  | sema7a   |
|  | scp2    |  | tgfb1i1  |
|  | tst     |  | znf580   |
|  | coa5    |  | nedd9    |
|  | rab28   |  | reck     |
|  | ccdc88b |  | wisp3    |
|  | fis1    |  | pdgfd    |
|  | tspan11 |  | rgcc     |
|  | ndnf    |  | elf3     |

|  |          |  |         |
|--|----------|--|---------|
|  | bcs1l    |  | fh12    |
|  | slc30a10 |  | areg    |
|  | cep112   |  | has2    |
|  | galt     |  | itga8   |
|  | ndufs3   |  | tagln   |
|  | uqcrc1   |  | ptk6    |
|  | c10orf2  |  | bmx     |
|  | slc25a13 |  | il20    |
|  | nucks1   |  | ppm1a   |
|  | mfn2     |  | sos2    |
|  | acy1     |  | prkd1   |
|  | qpct     |  | spry3   |
|  | lrch3    |  | sgpp1   |
|  | col4a3bp |  | ptpra   |
|  | ppif     |  | pik3c2g |
|  | ppox     |  | ptprf   |
|  | gimap2   |  | mapk13  |
|  | gbap1    |  | capn2   |
|  | mff      |  | hipk3   |
|  | dguok    |  | brsk2   |
|  | ndufv1   |  | madd    |
|  | vps35    |  | crtc1   |
|  | cpne7    |  | gnrh2   |
|  | syn3     |  | ranbp9  |
|  | ndufs4   |  | nenf    |
|  | snord12c |  | traf4   |
|  | sbds     |  | ptpr    |
|  | chchd7   |  | prr5    |
|  | chchd6   |  | agap2   |
|  | pex13    |  | ralb    |
|  | mut      |  | pik3ip1 |
|  | ahcy     |  | ptpn21  |
|  | prdx4    |  | sh2d3a  |
|  | tuba4a   |  | grb7    |
|  | parl     |  | pip4k2b |
|  | mars2    |  | cerk    |
|  | gne      |  | clmp    |
|  | yme111   |  | ptpn13  |
|  | polg     |  | ksr1    |
|  | atp6     |  | phip    |
|  | nd1      |  | tbc1d3  |



|  |          |  |           |
|--|----------|--|-----------|
|  | mrs2     |  | pik3ap1   |
|  | suox     |  | cnksr1    |
|  | rdh14    |  | pak7      |
|  | mon1a    |  | gmfb      |
|  | spg7     |  | rasgrf2   |
|  | psma2    |  | ntsr2     |
|  | dhrs4l1  |  | ncam2     |
|  | tbc1d8b  |  | numbl     |
|  | htn3     |  | stk17b    |
|  | cpox     |  | camk1d    |
|  | pygm     |  | ptprk     |
|  | psmd11   |  | erbb2ip   |
|  | rpn2     |  | net1      |
|  | arsa     |  | tob2      |
|  | psmc3    |  | dynlrb1   |
|  | mocs1    |  | stk16     |
|  | xk       |  | tob1      |
|  | slc17a5  |  | nbl1      |
|  | etfa     |  | fam3c     |
|  | cox17    |  | serpinb10 |
|  | c19orf12 |  | crtc2     |
|  | aspa     |  | rheb      |
|  | mccc2    |  | smurf1    |
|  | cln6     |  | lox       |
|  | rab5b    |  | c1qtnf6   |
|  | cln5     |  | mapk4     |
|  | gsap     |  | ddit4     |
|  | oma1     |  | rrad      |
|  | mgst1    |  | mapk6     |
|  | trappc8  |  | rps6      |
|  | prss3p2  |  | ggps1     |
|  | gnptab   |  | trib3     |
|  | cln8     |  | ppp2r5a   |
|  | pmpcb    |  | grb14     |
|  | vdac1p3  |  | ogt       |
|  | epg5     |  | chka      |
|  | dmwd     |  | pim3      |
|  | kiaa1033 |  | errfi1    |
|  | nudt14   |  | klb       |
|  | ckmt1b   |  | ddit4l    |
|  | ckb      |  | rasd1     |

|  |           |  |          |
|--|-----------|--|----------|
|  | blmh      |  | pawr     |
|  | ppt2      |  | bex1     |
|  | bace1-as  |  | gpr39    |
|  | slc38a5   |  | gprc6a   |
|  | dmpk      |  | uchl3    |
|  | dhodh     |  | nfatc4   |
|  | yipf6     |  | sphkap   |
|  | kmo       |  | thg1l    |
|  | ppp2r2b   |  | klf14    |
|  | iscu      |  | rasl10b  |
|  | ptbp2     |  | ppap2a   |
|  | txn14a    |  | ptpn23   |
|  | cox6b1p3  |  | cdk5rap3 |
|  | slc1a2    |  | spred2   |
|  | zmat1     |  | rgl2     |
|  | paaf1     |  | rras     |
|  | pdxk      |  | mzf1     |
|  | slc7a11   |  | mapkapk5 |
|  | slc25a39  |  | mir92a1  |
|  | atg9b     |  | fgfbp1   |
|  | psme3     |  | zc3h12c  |
|  | ddx24     |  | dusp10   |
|  | atg12p1   |  | brap     |
|  | atg4b     |  | mir214   |
|  | rab33b    |  | mst1     |
|  | gpr158    |  | creg1    |
|  | tbc1d25   |  | akap13   |
|  | stab2     |  | mir190a  |
|  | dusp15    |  | cxcl17   |
|  | oser1     |  | cyp4z1   |
|  | gimap8    |  | mir101-1 |
|  | ttpa      |  | ccdc88a  |
|  | tmbim6    |  | lmcd1    |
|  | phb       |  | anxa2r   |
|  | slc25a15  |  | hsp90aa2 |
|  | loc401131 |  | metap2   |
|  | cdo1      |  | ptp4a2   |
|  | cers5     |  | dab2ip   |
|  | rnase3    |  | ddr1     |
|  | mid1      |  | eltd1    |
|  | zadh2     |  | mir564   |

|  |          |  |           |
|--|----------|--|-----------|
|  | hadhb    |  | ociad1    |
|  | lrrc8c   |  | lrrn3     |
|  | dbi      |  | med28     |
|  | cpt2     |  | cdcp1     |
|  | clps     |  | rgs3      |
|  | lipa     |  | tnfrsf12a |
|  | decr1    |  | bst1      |
|  | plin3    |  | stk4      |
|  | atpaf1   |  | tnfrsf25  |
|  | mospd1   |  | ptprm     |
|  | glyat    |  | aimp1     |
|  | slc44a1  |  | wdr83     |
|  | abhd12   |  | st3gal5   |
|  | mettl7b  |  | sgpl1     |
|  | tysnd1   |  | ptp4a1    |
|  | cox15    |  | sh3rf3    |
|  | nt5m     |  | trip6     |
|  | cers4    |  | pxdn      |
|  | glyctk   |  | rpsa      |
|  | acot7    |  | ecscr     |
|  | aebp1    |  | slk       |
|  | fabp5    |  | chi3l2    |
|  | mat2a    |  | pkn3      |
|  | elovl1   |  | map3k6    |
|  | acadl    |  | marcksl1  |
|  | gnpat    |  | mtus1     |
|  | acot11   |  | rnf181    |
|  | pank3    |  | mgarp     |
|  | grhpr    |  | plxnc1    |
|  | abhd5    |  | lect2     |
|  | mfsd8    |  | thoc5     |
|  | ifi27l2  |  | phpt1     |
|  | eddm3b   |  | kank1     |
|  | akap10   |  | pgam1     |
|  | tor2a    |  | phlda1    |
|  | ntan1    |  | mir30c2   |
|  | eddm3a   |  | icmt      |
|  | slc30a6  |  | inpp5j    |
|  | c19orf59 |  | inpp4b    |
|  | plin5    |  | lamtor1   |
|  | pnpla2   |  | gpld1     |

|  |            |  |          |
|--|------------|--|----------|
|  | echs1      |  | sorbs2   |
|  | acsl1      |  | cd68     |
|  | rn2        |  | pnck     |
|  | nus1       |  | chl1     |
|  | sptlc1     |  | clca1    |
|  | lppr4      |  | mrvi1    |
|  | gpr12      |  | cib1     |
|  | scarna17   |  | limk1    |
|  | scarna7    |  | dpysl3   |
|  | scarna9    |  | bai1     |
|  | scarna12   |  | rca1     |
|  | scarna6    |  | nrm1     |
|  | dars       |  | loxl2    |
|  | c21orf62   |  | scube3   |
|  | ift43      |  | tm2c3    |
|  | bex5       |  | spon1    |
|  | smpd2      |  | fut8     |
|  | ppt2-egf18 |  | fndc3b   |
|  | tub        |  | crtac1   |
|  |            |  | adam19   |
|  |            |  | lrg1     |
|  |            |  | serpinh1 |
|  |            |  | tnfaip6  |
|  |            |  | dpt      |
|  |            |  | bambi    |
|  |            |  | fap      |
|  |            |  | cdc42ep3 |
|  |            |  | fndc1    |
|  |            |  | fermt1   |
|  |            |  | slc39a9  |
|  |            |  | fntb     |
|  |            |  | fbln1    |
|  |            |  | rgmb     |
|  |            |  | vasn     |
|  |            |  | angptl7  |
|  |            |  | ltbp1    |
|  |            |  | bmp10    |
|  |            |  | ptpn14   |
|  |            |  | tnn      |
|  |            |  | col1ar   |
|  |            |  | rgma     |

|  |  |  |            |
|--|--|--|------------|
|  |  |  | lrp12      |
|  |  |  | cthrcl     |
|  |  |  | socs6      |
|  |  |  | stap2      |
|  |  |  | ptpn2      |
|  |  |  | gadd45gip1 |
|  |  |  | gbp1       |
|  |  |  | ndufa13    |
|  |  |  | pdlim2     |

**Table S14. Word occurrence scores for hPTH(1-34) and bPTH(7-34) keystone factors.** Word occurrence scores were generated using Genes2Wordcloud with the input 99<sup>th</sup> percentile-ranked keystone factors derived from KEGG pathway analysis of the hPTH(1-34) and bPTH(7-34) superconserved datasets. hPTH(1-34) word scores are denoted in black, bPTH(7-34) word scores are denoted in blue.

| <b>hPTH(1-34)</b> |                         | <b>bPTH(7-34)</b> |                         |
|-------------------|-------------------------|-------------------|-------------------------|
| <b>Word</b>       | <b>Occurrence Score</b> | <b>Word</b>       | <b>Occurrence Score</b> |
| mitochondrial     | 85                      | receptor          | 134                     |
| regulate          | 76                      | regulate          | 126                     |
| mutated           | 74                      | transcript        | 117                     |
| autophagy         | 69                      | mrna              | 109                     |
| neuron            | 64                      | signal            | 93                      |
| cdna              | 56                      | cdna              | 92                      |
| transcript        | 55                      | cancer            | 90                      |
| clone             | 48                      | inhibit           | 88                      |
| cellular          | 48                      | kinase            | 86                      |
| site              | 47                      | differential      | 59                      |
| brain             | 47                      | clone             | 56                      |
| signal            | 47                      | growth            | 54                      |
| model             | 45                      | bind              | 54                      |
| cause             | 43                      | pathway           | 50                      |
| muscle            | 42                      | tumor             | 49                      |
| acid              | 42                      | full-length       | 48                      |
| mrna              | 42                      | overexpressed     | 47                      |
| target            | 40                      | diabetic          | 45                      |
| decrease          | 40                      | tissue            | 45                      |
| bind              | 39                      | decrease          | 42                      |
| rna               | 39                      | apoptosis         | 42                      |
| deficient         | 38                      | response          | 41                      |
| inhibit           | 38                      | rack1             | 39                      |
| fatty             | 37                      | genome            | 36                      |
| enzyme            | 37                      | suppress          | 35                      |
| tissue            | 37                      | new               | 35                      |
| structure         | 37                      | up-regulated      | 35                      |
| phosphorylate     | 37                      | neuron            | 35                      |
| general           | 37                      | treatment         | 35                      |
| reveal            | 34                      | phosphorylated    | 33                      |
| degraded          | 34                      | reduce            | 32                      |
| mutant            | 34                      | general           | 31                      |

|             |    |             |    |
|-------------|----|-------------|----|
| map         | 34 | neurotensin | 31 |
| overexpress | 34 | secreted    | 31 |
| reduce      | 33 | reveal      | 31 |
| provide     | 33 | vitro       | 31 |

**Table S15. Latent semantic indexing interrogator terms.** The specific textual terms outlined below were employed to generate the respective implicit gene-association lists: each reported identified gene possesses a Cosine Similarity score of at least >0.1.

| <b>Arrestin</b> | <b>G protein</b>                   | <b>Cell Signaling</b>        |
|-----------------|------------------------------------|------------------------------|
| arrestin        | G protein                          | signaling                    |
| arrestin 2      | G alpha                            | cell signaling               |
| arrestin-2      | G beta                             | cellular signaling           |
| arrestin 3      | G gamma                            | signal transduction          |
| arrestin-3      | G beta gamma                       | intermediary cell metabolism |
| beta arrestin 1 | Guanine-nucleotide binding protein | signalling                   |
| beta arrestin-1 | Heterotrimeric                     | cell signalling              |
| beta arrestin 2 | G alpha beta gamma                 | cellular signalling          |
| beta arrestin-2 |                                    |                              |



**Table S16. Arrestin theoretical dataset.** Latent semantic indexing generated list of implicitly-associated genes linked to arrest-related input terminology. For each gene the Gene Symbol and textual definition is denoted below.

| Gene Symbol   | Definition                                                                                              |
|---------------|---------------------------------------------------------------------------------------------------------|
| 1110020p15rik | ubiquinol-cytochrome c reductase, complex III subunit X                                                 |
| 1110028a07rik | fat storage-inducing transmembrane protein 1                                                            |
| 1200014j11rik | similar to RIKEN cDNA 1200014J11 gene; RIKEN cDNA 1200014J11 gene                                       |
| 1500005a01rik | family with sequence similarity 158, member A                                                           |
| 1500010j02rik | RIKEN cDNA 1500010J02 gene                                                                              |
| 1700001g17rik | RIKEN cDNA 1700001G17 gene                                                                              |
| 2310079n02rik | RIKEN cDNA 2310079N02 gene                                                                              |
| 3222402p14rik | protein phosphatase 2, regulatory subunit B", alpha                                                     |
| 3300001g02rik | small nuclear ribonucleoprotein 25 (U11/U12)                                                            |
| 3322402l07rik | retinal degeneration 3                                                                                  |
| 5730449l18rik | tRNA splicing endonuclease 15 homolog (S. cerevisiae)                                                   |
| 621968        | T-cell receptor beta, variable 1                                                                        |
| 751864        | predicted gene 9733                                                                                     |
| 8430415e04rik | protein phosphatase 4, regulatory subunit 4                                                             |
| 9230105e10rik | similar to tripartite motif protein TRIM5; RIKEN cDNA 9230105E10 gene                                   |
| 9930022n03rik | T cell-interacting, activating receptor on myeloid cells 1                                              |
| a430107p09rik | similar to T-cell receptor alpha chain V region CTL-L17 precursor;                                      |
| a630038e17rik | RIKEN cDNA A630038E17 gene; RIKEN cDNA A630098A13 gene                                                  |
| a630098a13rik | RIKEN cDNA A630038E17 gene; RIKEN cDNA A630098A13 gene                                                  |
| a730076h11rik | RIKEN cDNA A730076H11 gene                                                                              |
| aak1          | AP2 associated kinase 1                                                                                 |
| abca4         | ATP-binding cassette, sub-family A (ABC1), member 4                                                     |
| abhd1         | abhydrolase domain containing 1                                                                         |
| abhd2         | abhydrolase domain containing 2                                                                         |
| abhd3         | abhydrolase domain containing 3                                                                         |
| abhd6         | predicted gene 1833; abhydrolase domain containing 6                                                    |
| abpa          | androgen binding protein alpha; hypothetical protein LOC100044256                                       |
| abpb          | androgen binding protein beta                                                                           |
| abpd          | predicted gene 6725; androgen binding protein delta; predicted gene 4684                                |
| abpe          | androgen binding protein epsilon                                                                        |
| abpg          | androgen binding protein gamma                                                                          |
| abpz          | androgen binding protein zeta                                                                           |
| abtb2         | ankyrin repeat and BTB (POZ) domain containing 2                                                        |
| actl6b        | actin-like 6B                                                                                           |
| acvr1b        | activin A receptor, type 1B                                                                             |
| acvr1c        | activin A receptor, type 1C                                                                             |
| acvr2a        | activin receptor IIA                                                                                    |
| acvr2b        | activin receptor IIB                                                                                    |
| adam1a        | a disintegrin and metalloproteinase domain 1a                                                           |
| adam1b        | similar to a disintegrin and metalloproteinase domain 1b; a disintegrin and metalloproteinase domain 1b |
| adam2         | a disintegrin and metalloproteinase domain 2                                                            |
| adam23        | a disintegrin and metalloproteinase domain 23; similar to ADAM23                                        |
| adam3         | a disintegrin and metalloproteinase domain 3 (cyritestin)                                               |
| adam4         | predicted gene 5746; a disintegrin and metalloproteinase domain 4                                       |
| adam5         | a disintegrin and metalloproteinase domain 5                                                            |
| adamts16      | a disintegrin-like and metalloproteinase (reprolysin type) with thrombospondin type 1 motif, 16         |
| add2          | adducin 2 (beta)                                                                                        |

|          |                                                                                                                                                                |
|----------|----------------------------------------------------------------------------------------------------------------------------------------------------------------|
| add3     | adducin 3 (gamma)                                                                                                                                              |
| adra1a   | adrenergic receptor, alpha 1a                                                                                                                                  |
| adra1b   | adrenergic receptor, alpha 1b                                                                                                                                  |
| adra1d   | adrenergic receptor, alpha 1d                                                                                                                                  |
| adra2a   | adrenergic receptor, alpha 2a                                                                                                                                  |
| adra2b   | adrenergic receptor, alpha 2b                                                                                                                                  |
| adra2c   | similar to alpha-2 adrenergic receptor; adrenergic receptor, alpha 2c                                                                                          |
| adrb1    | adrenergic receptor, beta 1                                                                                                                                    |
| adrb2    | adrenergic receptor, beta 2                                                                                                                                    |
| adrbk1   | adrenergic receptor kinase, beta 1                                                                                                                             |
| adrbk2   | adrenergic receptor kinase, beta 2                                                                                                                             |
| ads4     | anti dsDNA antibody 4                                                                                                                                          |
| aftph    | aftiphilin                                                                                                                                                     |
| ai324046 | expressed sequence AI324046                                                                                                                                    |
| ai607873 | expressed sequence AI607873                                                                                                                                    |
| aip1     | aryl hydrocarbon receptor-interacting protein-like 1                                                                                                           |
| akap5    | A kinase (PRKA) anchor protein 5                                                                                                                               |
| akr1c19  | aldo-keto reductase family 1, member C19                                                                                                                       |
| aldr5    | aldehyde reductase 5                                                                                                                                           |
| alph1    | alphaprotein 1                                                                                                                                                 |
| alph2    | alphaprotein 2                                                                                                                                                 |
| als2cl   | ALS2 C-terminal like                                                                                                                                           |
| als2cr2  | amyotrophic lateral sclerosis 2 (juvenile) chromosome region, candidate 2 homolog (human)                                                                      |
| amd      | autoimmune myocardial disease                                                                                                                                  |
| ankrd44  | ankyrin repeat domain 44                                                                                                                                       |
| ankrd49  | ankyrin repeat domain 49                                                                                                                                       |
| ankrd52  | ankyrin repeat domain 52                                                                                                                                       |
| ap1b1    | adaptor protein complex AP-1, beta 1 subunit                                                                                                                   |
| ap1m1    | adaptor-related protein complex AP-1, mu subunit 1                                                                                                             |
| ap1m2    | adaptor protein complex AP-1, mu 2 subunit                                                                                                                     |
| ap1s1    | adaptor protein complex AP-1, sigma 1                                                                                                                          |
| ap2a1    | adaptor protein complex AP-2, alpha 1 subunit                                                                                                                  |
| ap2a2    | hypothetical protein LOC100044229; adaptor protein complex AP-2, alpha 2 subunit                                                                               |
| ap2b1    | adaptor-related protein complex 2, beta 1 subunit                                                                                                              |
| ap2m1    | predicted gene 8717; adaptor protein complex AP-2, mu1                                                                                                         |
| ap2s1    | adaptor-related protein complex 2, sigma 1 subunit                                                                                                             |
| ap3m1    | adaptor-related protein complex 3, mu 1 subunit; similar to Adapter-related protein complex 3 mu 1 subunit (Mu-adaptin 3A) (AP-3 adapter complex mu3A subunit) |
| ap3s1    | predicted gene 7603; adaptor-related protein complex 3, sigma 1 subunit; predicted gene 5610                                                                   |
| ap3s2    | adaptor-related protein complex 3, sigma 2 subunit                                                                                                             |
| ap4b1    | adaptor-related protein complex AP-4, beta 1                                                                                                                   |
| ap4e1    | adaptor-related protein complex AP-4, epsilon 1                                                                                                                |
| ap4m1    | adaptor-related protein complex AP-4, mu 1                                                                                                                     |
| ap4s1    | adaptor-related protein complex AP-4, sigma 1                                                                                                                  |
| apbh     | androgen-binding protein eta                                                                                                                                   |
| arcn1    | similar to Archain 1; archain 1; similar to coat protein delta-cop; predicted gene 8752; predicted gene 8750; similar to archain                               |
| arf6     | ADP-ribosylation factor 6                                                                                                                                      |
| arl3     | ADP-ribosylation factor-like 3                                                                                                                                 |
| arr3     | arrestin 3, retinal                                                                                                                                            |
| arb1     | arrestin, beta 1                                                                                                                                               |
| arb2     | arrestin, beta 2                                                                                                                                               |
| arrdc2   | arrestin domain containing 2                                                                                                                                   |
| arrdc3   | arrestin domain containing 3                                                                                                                                   |
| arrdc4   | arrestin domain containing 4                                                                                                                                   |
| asa      | anti-sarcolemmal autoantibodies                                                                                                                                |

|               |                                                                                                                                         |
|---------------|-----------------------------------------------------------------------------------------------------------------------------------------|
| atp12a        | ATPase, H+/K+ transporting, nongastric, alpha polypeptide                                                                               |
| atp1a1        | ATPase, Na+/K+ transporting, alpha 1 polypeptide                                                                                        |
| atp1a3        | ATPase, Na+/K+ transporting, alpha 3 polypeptide                                                                                        |
| atp1a4        | ATPase, Na+/K+ transporting, alpha 4 polypeptide                                                                                        |
| atp1b1        | ATPase, Na+/K+ transporting, beta 1 polypeptide                                                                                         |
| atp1b2        | ATPase, Na+/K+ transporting, beta 2 polypeptide                                                                                         |
| atp1b3        | ATPase, Na+/K+ transporting, beta 3 polypeptide                                                                                         |
| atp1b3-rs     | ATPase, Na+/K+ transporting, beta 3 polypeptide, related sequence                                                                       |
| atp1b3-rs2    | ATPase, Na+/K+ transporting, beta 3 polypeptide, related sequence 2                                                                     |
| atp1b4        | ATPase, (Na+)/K+ transporting, beta 4 polypeptide                                                                                       |
| atp4a         | ATPase, H+/K+ exchanging, gastric, alpha polypeptide                                                                                    |
| atp4b         | ATPase, H+/K+ exchanging, beta polypeptide                                                                                              |
| atp5a1        | ATP synthase, H+ transporting, mitochondrial F1 complex, alpha subunit, isoform 1                                                       |
| atp5b         | ATP synthase, H+ transporting mitochondrial F1 complex, beta subunit                                                                    |
| atp5c1        | ATP synthase, H+ transporting, mitochondrial F1 complex, gamma polypeptide 1                                                            |
| atp5d         | ATP synthase, H+ transporting, mitochondrial F1 complex, delta subunit                                                                  |
| atp5e         | ATP synthase, H+ transporting, mitochondrial F1 complex, epsilon subunit                                                                |
| atp5f1        | ATP synthase, H+ transporting, mitochondrial F0 complex, subunit b, isoform 1; predicted gene 12231                                     |
| atp5g2        | ATP synthase, H+ transporting, mitochondrial F0 complex, subunit c (subunit 9), isoform 2                                               |
| atp5j         | ATP synthase, H+ transporting, mitochondrial F0 complex, subunit F                                                                      |
| atp5j2        | predicted gene 6835; ATP synthase, H+ transporting, mitochondrial F0 complex, subunit f, isoform 2; predicted gene 6581                 |
| atp5k         | predicted gene 2972; ATP synthase, H+ transporting, mitochondrial F1F0 complex, subunit e                                               |
| atp5l         | ATP synthase, H+ transporting, mitochondrial FO complex, subunit G2, pseudogene;                                                        |
| atp5s         | ATP synthase, H+ transporting, mitochondrial F0 complex, subunit s                                                                      |
| atp6v0c       | ATPase, H+ transporting, lysosomal V0 subunit C, pseudogene 2; ATPase, H+ transporting, lysosomal V0 subunit C                          |
| atp6v1c2      | ATPase, H+ transporting, lysosomal V1 subunit C2                                                                                        |
| atpaf1        | ATP synthase mitochondrial F1 complex assembly factor 1                                                                                 |
| aup1          | ancient ubiquitous protein 1                                                                                                            |
| avpr2         | arginine vasopressin receptor 2                                                                                                         |
| b230339m05rik | Ral GTPase activating protein, beta subunit (non-catalytic)                                                                             |
| b3galt4       | UDP-Gal:betaGlcNAc beta 1,3-galactosyltransferase, polypeptide 4                                                                        |
| b3galt5       | UDP-Gal:betaGlcNAc beta 1,3-galactosyltransferase, polypeptide 5                                                                        |
| b3galt6       | similar to UDP-Gal:betaGal beta 1,3-galactosyltransferase, polypeptide 6; UDP-Gal:betaGal beta 1,3-galactosyltransferase, polypeptide 6 |
| b3gat3        | beta-1,3-glucuronyltransferase 3 (glucuronosyltransferase I)                                                                            |
| b3gnt2        | UDP-GlcNAc:betaGal beta-1,3-N-acetylglucosaminyltransferase 2                                                                           |
| b3gnt3        | UDP-GlcNAc:betaGal beta-1,3-N-acetylglucosaminyltransferase 3                                                                           |
| b3gnt4        | UDP-GlcNAc:betaGal beta-1,3-N-acetylglucosaminyltransferase 4                                                                           |
| b3gnt5        | UDP-GlcNAc:betaGal beta-1,3-N-acetylglucosaminyltransferase 5                                                                           |
| b4galnt3      | beta-1,4-N-acetyl-galactosaminyl transferase 3                                                                                          |
| b4galnt4      | beta-1,4-N-acetyl-galactosaminyl transferase 4                                                                                          |
| b4galt1       | UDP-Gal:betaGlcNAc beta 1,4- galactosyltransferase, polypeptide 1                                                                       |
| b4galt2       | UDP-Gal:betaGlcNAc beta 1,4- galactosyltransferase, polypeptide 2                                                                       |
| b4galt3       | UDP-Gal:betaGlcNAc beta 1,4-galactosyltransferase, polypeptide 3                                                                        |
| b4galt4       | UDP-Gal:betaGlcNAc beta 1,4-galactosyltransferase, polypeptide 4                                                                        |
| b4galt5       | UDP-Gal:betaGlcNAc beta 1,4-galactosyltransferase, polypeptide 5                                                                        |
| b4galt6       | UDP-Gal:betaGlcNAc beta 1,4-galactosyltransferase, polypeptide 6; similar to Beta-1,4-galactosyltransferase 6                           |
| bat4          | predicted gene 5628; HLA-B associated transcript 4                                                                                      |
| bat5          | HLA-B associated transcript 5                                                                                                           |
| bc023829      | cDNA sequence BC023829                                                                                                                  |
| bc023892      | family with sequence similarity 46, member A                                                                                            |
| bcam          | basal cell adhesion molecule                                                                                                            |
| bckdha        | branched chain ketoacid dehydrogenase E1, alpha polypeptide                                                                             |
| bckdhb        | branched chain ketoacid dehydrogenase E1, beta polypeptide; similar to 3-methyl-2-oxobutanoate dehydrogenase                            |
| blvrb         | biliverdin reductase B (flavin reductase (NADPH))                                                                                       |

|               |                                                                                                                                                                       |
|---------------|-----------------------------------------------------------------------------------------------------------------------------------------------------------------------|
| bmp15         | bone morphogenetic protein 15                                                                                                                                         |
| bola1         | bolA-like 1 (E. coli)                                                                                                                                                 |
| bola2         | bolA-like 2 (E. coli)                                                                                                                                                 |
| bola3         | bolA-like 3 (E. coli)                                                                                                                                                 |
| btf3          | predicted gene 9308; basic transcription factor 3; predicted gene 3531; predicted gene 7973                                                                           |
| c330016o10rik | RIKEN cDNA C330016O10 gene                                                                                                                                            |
| c4bp-ps1      | complement component 4 binding protein, pseudogene 1                                                                                                                  |
| c8a           | complement component 8, alpha polypeptide                                                                                                                             |
| c8b           | complement component 8, beta polypeptide                                                                                                                              |
| c8g           | complement component 8, gamma polypeptide                                                                                                                             |
| cab39         | calcium binding protein 39                                                                                                                                            |
| cabp2         | calcium binding protein 2                                                                                                                                             |
| cabp4         | calcium binding protein 4                                                                                                                                             |
| cabp5         | similar to CaBP5; calcium binding protein 5                                                                                                                           |
| cacna1b       | calcium channel, voltage-dependent, N type, alpha 1B subunit                                                                                                          |
| cacna1d       | calcium channel, voltage-dependent, L type, alpha 1D subunit                                                                                                          |
| cacna1f       | calcium channel, voltage-dependent, alpha 1F subunit                                                                                                                  |
| cacna2d1      | calcium channel, voltage-dependent, alpha2/delta subunit 1                                                                                                            |
| cacna2d2      | calcium channel, voltage-dependent, alpha 2/delta subunit 2; similar to Cacna2d2 protein                                                                              |
| cacna2d3      | calcium channel, voltage-dependent, alpha2/delta subunit 3                                                                                                            |
| cacna2d4      | calcium channel, voltage-dependent, alpha 2/delta subunit 4                                                                                                           |
| cacnb1        | calcium channel, voltage-dependent, beta 1 subunit                                                                                                                    |
| cacnb2        | calcium channel, voltage-dependent, beta 2 subunit                                                                                                                    |
| cacnb3        | calcium channel, voltage-dependent, beta 3 subunit                                                                                                                    |
| cacnb4        | calcium channel, voltage-dependent, beta 4 subunit                                                                                                                    |
| cacng1        | calcium channel, voltage-dependent, gamma subunit 1                                                                                                                   |
| cacng3        | calcium channel, voltage-dependent, gamma subunit 3                                                                                                                   |
| cacng4        | calcium channel, voltage-dependent, gamma subunit 4                                                                                                                   |
| cacng5        | calcium channel, voltage-dependent, gamma subunit 5                                                                                                                   |
| cacng6        | calcium channel, voltage-dependent, gamma subunit 6                                                                                                                   |
| cacng7        | calcium channel, voltage-dependent, gamma subunit 7                                                                                                                   |
| calr2         | calreticulin 2                                                                                                                                                        |
| camk1g        | calcium/calmodulin-dependent protein kinase I gamma                                                                                                                   |
| camk2b        | calcium/calmodulin-dependent protein kinase II, beta                                                                                                                  |
| camkl         | calcium/calmodulin dependent protein kinase-like                                                                                                                      |
| capns2        | calpain, small subunit 2                                                                                                                                              |
| capza1        | capping protein (actin filament) muscle Z-line, alpha 1; similar to capping protein (actin filament) muscle Z-line, alpha 1; predicted gene 3608; predicted gene 5920 |
| capza1-ps2    | capping protein (actin filament) muscle Z-line, alpha 1, pseudogene 2                                                                                                 |
| capza2        | capping protein (actin filament) muscle Z-line, alpha 2                                                                                                               |
| capzb         | capping protein (actin filament) muscle Z-line, beta                                                                                                                  |
| cbl-ps1       | Casitas B-lineage lymphoma, pseudogene 1                                                                                                                              |
| cbx3-ps1      | chromobox homolog 3 (Drosophila HP1 gamma), pseudogene 1                                                                                                              |
| cbx3-ps2      | chromobox homolog 3 (Drosophila HP1 gamma), pseudogene 2                                                                                                              |
| cbx3-ps3      | chromobox homolog 3 (Drosophila HP1 gamma), pseudogene 3                                                                                                              |
| ccdc85b       | coiled-coil domain containing 85B                                                                                                                                     |
| ccl19         | predicted gene 2564; predicted gene 12407; predicted gene 2457; chemokine (C-C motif) ligand 19; predicted gene 2023                                                  |
| ccl21b        | predicted gene 13304; similar to beta chemokine Exodus-2; predicted gene 10591; chemokine (C-C motif) ligand 21B; chemokine (C-C motif) ligand 21C (leucine)          |
| ccl21c        | predicted gene 13304; similar to beta chemokine Exodus-2; predicted gene 10591; chemokine (C-C motif) ligand 21B; chemokine (C-C motif) ligand 21C (leucine)          |
| ccl25         | chemokine (C-C motif) ligand 25                                                                                                                                       |
| ccr111        | chemokine (C-C motif) receptor 1-like 1                                                                                                                               |
| ccr7          | chemokine (C-C motif) receptor 7                                                                                                                                      |
| ccrl1         | chemokine (C-C motif) receptor-like 1                                                                                                                                 |
| ccrl2         | chemokine (C-C motif) receptor-like 2                                                                                                                                 |

|          |                                                                                                                |
|----------|----------------------------------------------------------------------------------------------------------------|
| cct2     | chaperonin containing Tcp1, subunit 2 (beta)                                                                   |
| cct3     | chaperonin containing Tcp1, subunit 3 (gamma)                                                                  |
| cct3-ps1 | chaperonin containing Tcp1, subunit 3 (gamma) pseudogene 1                                                     |
| cct5     | chaperonin containing Tcp1, subunit 5 (epsilon)                                                                |
| cct6a    | chaperonin containing Tcp1, subunit 6a (zeta)                                                                  |
| cct7     | chaperonin containing Tcp1, subunit 7 (eta)                                                                    |
| cct8     | chaperonin containing Tcp1, subunit 8 (theta)                                                                  |
| cd3d     | CD3 antigen, delta polypeptide                                                                                 |
| cd3g     | CD3 antigen, gamma polypeptide                                                                                 |
| cd84     | CD84 antigen                                                                                                   |
| cd8b1    | CD8 antigen, beta chain 1                                                                                      |
| cdc42bpb | CDC42 binding protein kinase beta                                                                              |
| cds2     | CDP-diacylglycerol synthase (phosphatidate cytidyltransferase) 2                                               |
| cebpg    | CCAAT/enhancer binding protein (C/EBP), gamma                                                                  |
| cep290   | centrosomal protein 290                                                                                        |
| cerkl    | ceramide kinase-like                                                                                           |
| ctn1     | centrin 1                                                                                                      |
| ctn3     | centrin 3                                                                                                      |
| ctn4     | centrin 4; predicted gene 7094                                                                                 |
| cfhe     | complement component factor h, electrophoretic variant                                                         |
| cga      | glycoprotein hormones, alpha subunit                                                                           |
| chkb     | choline kinase beta                                                                                            |
| chm      | similar to choroideremia; choroideremia                                                                        |
| chrna1   | cholinergic receptor, nicotinic, alpha polypeptide 1 (muscle); similar to acetylcholine receptor alpha-subunit |
| chrna2   | cholinergic receptor, nicotinic, alpha polypeptide 2 (neuronal)                                                |
| chrna6   | cholinergic receptor, nicotinic, alpha polypeptide 6                                                           |
| chrnb1   | cholinergic receptor, nicotinic, beta polypeptide 1 (muscle)                                                   |
| chrnb3   | cholinergic receptor, nicotinic, beta polypeptide 3                                                            |
| chrnb4   | cholinergic receptor, nicotinic, beta polypeptide 4                                                            |
| chrnd    | cholinergic receptor, nicotinic, delta polypeptide                                                             |
| chrne    | cholinergic receptor, nicotinic, epsilon polypeptide                                                           |
| chrng    | cholinergic receptor, nicotinic, gamma polypeptide                                                             |
| chst8    | carbohydrate (N-acetylgalactosamine 4-O) sulfotransferase 8                                                    |
| chst9    | carbohydrate (N-acetylgalactosamine 4-O) sulfotransferase 9                                                    |
| circp1   | circadian photosensitivity 1                                                                                   |
| circp2   | circadian photosensitivity 2                                                                                   |
| clta     | clathrin, light polypeptide (Lca)                                                                              |
| cltb     | clathrin, light polypeptide (Lcb)                                                                              |
| cltc     | clathrin, heavy polypeptide (Hc)                                                                               |
| cnga1    | cyclic nucleotide gated channel alpha 1                                                                        |
| cnga3    | cyclic nucleotide gated channel alpha 3                                                                        |
| cnga4    | cyclic nucleotide gated channel alpha 4                                                                        |
| cngb1    | cyclic nucleotide gated channel beta 1                                                                         |
| cngb3    | cyclic nucleotide gated channel beta 3                                                                         |
| col13a1  | collagen, type XIII, alpha 1                                                                                   |
| col16a1  | collagen, type XVI, alpha 1                                                                                    |
| col6a3   | collagen, type VI, alpha 3                                                                                     |
| copa     | coatamer protein complex subunit alpha                                                                         |
| copb1    | coatamer protein complex, subunit beta 1                                                                       |
| copb2    | coatamer protein complex, subunit beta 2 (beta prime)                                                          |
| cope     | coatamer protein complex, subunit epsilon                                                                      |
| copg     | coatamer protein complex, subunit gamma                                                                        |
| copg2    | coatamer protein complex, subunit gamma 2                                                                      |
| copz1    | coatamer protein complex, subunit zeta 1                                                                       |
| copz2    | coatamer protein complex, subunit zeta 2                                                                       |

|             |                                                                                     |
|-------------|-------------------------------------------------------------------------------------|
| cox7a2l     | cytochrome c oxidase subunit VIIa polypeptide 2-like; predicted gene 6969           |
| cpn2        | carboxypeptidase N, polypeptide 2                                                   |
| crb1        | crumbs homolog 1 (Drosophila)                                                       |
| creb5       | RIKEN cDNA 9430076C15 gene; cAMP responsive element binding protein 5               |
| creld2      | cysteine-rich with EGF-like domains 2                                               |
| crsp        | cryptorchidism with white spotting, deletion region                                 |
| crx         | cone-rod homeobox containing gene                                                   |
| cryba2      | crystallin, beta A2                                                                 |
| crygn       | crystallin, gamma N                                                                 |
| csf2ra      | colony stimulating factor 2 receptor, alpha, low-affinity (granulocyte-macrophage)  |
| csf2rb      | colony stimulating factor 2 receptor, beta, low-affinity (granulocyte-macrophage)   |
| csf2rb2     | colony stimulating factor 2 receptor, beta 2, low-affinity (granulocyte-macrophage) |
| csn1s1      | casein alpha s1                                                                     |
| csn1s2a     | casein alpha s2-like A                                                              |
| csn1s2b     | casein alpha s2-like B                                                              |
| csn2        | casein beta                                                                         |
| csn3        | casein kappa                                                                        |
| csnk1g1     | casein kinase 1, gamma 1                                                            |
| csnk1g3     | casein kinase 1, gamma 3; similar to casein kinase 1, gamma 3                       |
| csnk2a1-ps1 | casein kinase 2, alpha 1 polypeptide, pseudogene 1                                  |
| csnk2a1-rs2 | casein kinase 2, alpha 1, related sequence 2                                        |
| csnk2a1-rs3 | casein kinase 2, alpha 1, related sequence 3                                        |
| cts         | cataract and small eye                                                              |
| cx3cl1-rs1  | chemokine (C-X3-C motif) ligand 1, related sequence 1                               |
| cxcl3       | chemokine (C-X-C motif) ligand 3                                                    |
| cxcr4       | chemokine (C-X-C motif) receptor 4                                                  |
| cxcr7       | chemokine (C-X-C motif) receptor 7                                                  |
| cyp11d      | cytochrome P450, 11d                                                                |
| cyp2a       | cytochrome P450, family 2, subfamily a                                              |
| cyp2b13     | cytochrome P450, family 2, subfamily b, polypeptide 13                              |
| cyp2d       | cytochrome P450, 2d region                                                          |
| cyp2d10     | cytochrome P450, family 2, subfamily d, polypeptide 10                              |
| cyp2d11     | cytochrome P450, family 2, subfamily d, polypeptide 11                              |
| cysltr1     | cysteinyl leukotriene receptor 1                                                    |
| d10mit135   | DNA segment, Chr 10, Massachusetts Institute of Technology 135                      |
| d10mit164   | DNA segment, Chr 10, Massachusetts Institute of Technology 164                      |
| d10mit271   | DNA Segment, Chr 10, Massachusetts Institute of Technology 271                      |
| d10mit70    | DNA segment, Chr 10, Massachusetts Institute of Technology 70                       |
| d10mit96    | DNA segment, Chr 10, Massachusetts Institute of Technology 96                       |
| d10nds2     | DNA segment, Chr 10, Nuffield Department of Surgery 2                               |
| d11mit174   | DNA segment, Chr 11, Massachusetts Institute of Technology 174                      |
| d11mit188   | DNA segment, Chr 11, Massachusetts Institute of Technology 188                      |
| d11mit51    | DNA segment, Chr 11, Massachusetts Institute of Technology 51                       |
| d11mit84    | DNA segment, Chr 11, Massachusetts Institute of Technology 84                       |
| d13mit130   | DNA segment, Chr 13, Massachusetts Institute of Technology 130                      |
| d13mit260   | DNA segment, Chr 13, Massachusetts Institute of Technology 260                      |
| d13mit47    | DNA segment, Chr 13, Massachusetts Institute of Technology 47                       |
| d14mit101   | DNA segment, Chr 14, Massachusetts Institute of Technology 101                      |
| d14mit113   | DNA segment, Chr 14, Massachusetts Institute of Technology 113                      |
| d14mit173   | DNA segment, Chr 14, Massachusetts Institute of Technology 173                      |
| d14mit45    | DNA segment, Chr 14, Massachusetts Institute of Technology 45                       |
| d14mit56    | DNA segment, Chr 14, Massachusetts Institute of Technology 56                       |
| d14mit60    | DNA segment, Chr 14, Massachusetts Institute of Technology 60                       |
| d14mit62    | DNA segment, Chr 14, Massachusetts Institute of Technology 62                       |
| d17h6s53e   | DNA segment, Chr 17, human D6S53E                                                   |

|             |                                                                |
|-------------|----------------------------------------------------------------|
| d18ertd653e | DNA segment, Chr 18, ERATO Doi 653, expressed                  |
| d19mit1     | DNA segment, Chr 19, Massachusetts Institute of Technology 1   |
| d1mit538    | DNA Segment, Chr 1, Massachusetts Institute of Technology 538  |
| d1mit77     | DNA segment, Chr 1, Massachusetts Institute of Technology 77   |
| d1nds1      | DNA segment, Chr 1, Nuffield Department of Surgery 1           |
| d2mit19     | DNA segment, Chr 2, Massachusetts Institute of Technology 19   |
| d2mit65     | DNA segment, Chr 2, Massachusetts Institute of Technology 65   |
| d3mit116    | DNA segment, Chr 3, Massachusetts Institute of Technology 116  |
| d3mit121    | DNA segment, Chr 3, Massachusetts Institute of Technology 121  |
| d3mit147    | DNA segment, Chr 3, Massachusetts Institute of Technology 147  |
| d3mit19     | DNA segment, Chr 3, Massachusetts Institute of Technology 19   |
| d3mit277    | DNA segment, Chr 3, Massachusetts Institute of Technology 277  |
| d3mit293    | DNA segment, Chr 3, Massachusetts Institute of Technology 293  |
| d3mit44     | DNA segment, Chr 3, Massachusetts Institute of Technology 44   |
| d3mit89     | DNA segment, Chr 3, Massachusetts Institute of Technology 89   |
| d4mit116    | DNA segment, Chr 4, Massachusetts Institute of Technology 116  |
| d4mit152    | DNA segment, Chr 4, Massachusetts Institute of Technology 152  |
| d5mit405    | DNA Segment, Chr 5 Massachusetts Institute of Technology 405   |
| d5mit75     | DNA segment, Chr 5, Massachusetts Institute of Technology 75   |
| d6mit33     | DNA segment, Chr 6, Massachusetts Institute of Technology 33   |
| d6mit59     | DNA segment, Chr 6, Massachusetts Institute of Technology 59   |
| d7h19f11s1  | DNA segment, Chr 7, human D19F11S1                             |
| d7mit133    | DNA segment, Chr 7, Massachusetts Institute of Technology 133  |
| d7mit151    | DNA segment, Chr 7, Massachusetts Institute of Technology 151  |
| d7mit177    | DNA segment, Chr 7, Massachusetts Institute of Technology 177  |
| d7mit242    | DNA segment, Chr 7, Massachusetts Institute of Technology 242  |
| d7mit357    | DNA segment, Chr 7, Massachusetts Institute of Technology 357  |
| d7mit362    | DNA segment, Chr 7, Massachusetts Institute of Technology 362  |
| d7mit72     | DNA segment, Chr 7, Massachusetts Institute of Technology 72   |
| d7mit98     | DNA segment, Chr 7, Massachusetts Institute of Technology 98   |
| d8ertd738e  | DNA segment, Chr 8, ERATO Doi 738, expressed                   |
| d9mit150    | DNA segment, Chr 9, Massachusetts Institute of Technology 150  |
| d9mit227    | DNA segment, Chr 9, Massachusetts Institute of Technology 227  |
| d9mit247    | DNA segment, Chr 9, Massachusetts Institute of Technology 247  |
| d9mit260    | DNA segment, Chr 9, Massachusetts Institute of Technology 260  |
| d9mit263    | DNA segment, Chr 9, Massachusetts Institute of Technology 263  |
| d9mit264    | DNA segment, Chr 9, Massachusetts Institute of Technology 264  |
| d9mit286    | DNA segment, Chr 9, Massachusetts Institute of Technology 286  |
| d9mit289    | DNA segment, Chr 9, Massachusetts Institute of Technology 289  |
| d9mit304    | DNA Segment, Chr 9, Massachusetts Institute of Technology 304  |
| d9mit48     | DNA segment, Chr 9, Massachusetts Institute of Technology 48   |
| dak         | dihydroxyacetone kinase 2 homolog (yeast)                      |
| dbt         | dihydroliipoamide branched chain transacylase E2               |
| ddx50       | predicted gene 8228; DEAD (Asp-Glu-Ala-Asp) box polypeptide 50 |
| deb1        | differentially expressed in B16F10 1                           |
| dgkb        | diacylglycerol kinase, beta                                    |
| dgkd        | diacylglycerol kinase, delta                                   |
| dgkg        | diacylglycerol kinase, gamma                                   |
| dgkh        | diacylglycerol kinase, eta                                     |
| dgkq        | diacylglycerol kinase, theta                                   |
| dhrs3       | dehydrogenase/reductase (SDR family) member 3                  |
| dhx8        | DEAH (Asp-Glu-Ala-His) box polypeptide 8                       |
| dmkn        | dermokine                                                      |
| dmxl2       | Dmx-like 2                                                     |
| dnajc14     | DnaJ (Hsp40) homolog, subfamily C, member 14                   |

|          |                                                                                                                       |
|----------|-----------------------------------------------------------------------------------------------------------------------|
| dnajc5b  | DnaJ (Hsp40) homolog, subfamily C, member 5 beta                                                                      |
| dnajc6   | DnaJ (Hsp40) homolog, subfamily C, member 6                                                                           |
| dnase1l3 | deoxyribonuclease 1-like 3                                                                                            |
| drap1    | Dr1 associated protein 1 (negative cofactor 2 alpha); similar to Dr1 associated protein 1 (negative cofactor 2 alpha) |
| drd2     | dopamine receptor 2                                                                                                   |
| dtnb     | dystrobrevin, beta                                                                                                    |
| dtwd2    | DTW domain containing 2                                                                                               |
| dub1     | deubiquitinating enzyme 1; similar to DUB-1                                                                           |
| dub3     | predicted gene 6596                                                                                                   |
| dub4     | deubiquitinating enzyme 4                                                                                             |
| dusp16   | dual specificity phosphatase 16                                                                                       |
| dvb11-1  | V11<+> T-cell deletion 1                                                                                              |
| dvb11-2  | V11<+> T-cell deletion 2                                                                                              |
| dvb11-3  | V11<+> T-cell deletion 3                                                                                              |
| dxcp3    | dexamethasone induced cleft palate 3                                                                                  |
| dxhxs101 | DNA segment, Chr X, human DXS101                                                                                      |
| dxhxs178 | DNA segment, Chr X, human DXS178                                                                                      |
| dxmit103 | DNA segment, Chr X, Massachusetts Institute of Technology 103                                                         |
| dxmit125 | DNA segment, Chr X, Massachusetts Institute of Technology 125                                                         |
| dxmit139 | DNA segment, Chr X, Massachusetts Institute of Technology 139                                                         |
| dxmit49  | DNA segment, Chr X, Massachusetts Institute of Technology 49                                                          |
| dxmit52  | DNA segment, Chr X, Massachusetts Institute of Technology 52                                                          |
| dxmit81  | DNA segment, Chr X, Massachusetts Institute of Technology 81                                                          |
| dxmit85  | DNA segment, Chr X, Massachusetts Institute of Technology 85                                                          |
| dxcas23  | DNA segment, Chr X, Pasteur Institute 23                                                                              |
| ea4      | erythrocyte antigen 4                                                                                                 |
| eae1     | experimental allergic encephalomyelitis susceptibility1                                                               |
| ebi2     | G protein-coupled receptor 183                                                                                        |
| edil3    | EGF-like repeats and discoidin I-like domains 3                                                                       |
| eef1b2   | eukaryotic translation elongation factor 1 beta 2                                                                     |
| eef1d    | predicted gene 11675; eukaryotic translation elongation factor 1 delta (guanine nucleotide exchange protein)          |
| eef1g    | eukaryotic translation elongation factor 1 gamma                                                                      |
| eg622901 | predicted gene 6368                                                                                                   |
| eg627648 | kelch-like 3 (Drosophila)                                                                                             |
| eg630061 | T cell receptor alpha variable 7-5                                                                                    |
| eg630579 | zinc finger protein 80                                                                                                |
| eg667604 | predicted gene 8721                                                                                                   |
| eg668389 | immunoglobulin heavy variable V2-4                                                                                    |
| eg668723 | amylase 2, pseudogene 1                                                                                               |
| eif2b1   | eukaryotic translation initiation factor 2B, subunit 1 (alpha)                                                        |
| eif2b2   | eukaryotic translation initiation factor 2B, subunit 2 beta                                                           |
| eif2b4   | eukaryotic translation initiation factor 2B, subunit 4 delta                                                          |
| eif2s2   | similar to Eif2s2 protein; eukaryotic translation initiation factor 2, subunit 2 (beta)                               |
| eif3b    | hypothetical protein LOC100047993; eukaryotic translation initiation factor 3, subunit B                              |
| eif3i    | eukaryotic translation initiation factor 3, subunit I                                                                 |
| eif5     | similar to Eukaryotic translation initiation factor 5; eukaryotic translation initiation factor 5                     |
| elmaz1   | elevated maze behavior 1                                                                                              |
| elmaz2   | elevated maze behavior 2                                                                                              |
| elovl4   | elongation of very long chain fatty acids (FEN1/Elo2, SUR4/Elo3, yeast)-like 4                                        |
| elp2     | elongation protein 2 homolog (S. cerevisiae)                                                                          |
| emv22    | endogenous ecotropic MuLV 22                                                                                          |
| emv27    | endogenous ecotropic MuLV 27                                                                                          |
| emv35    | endogenous ecotropic MuLV 35                                                                                          |
| eno3     | enolase 3, beta muscle                                                                                                |
| ensa     | predicted gene 5224; endosulfine alpha; similar to endosulfine alpha isoform 1                                        |



|                    |                                                                                                                                   |
|--------------------|-----------------------------------------------------------------------------------------------------------------------------------|
| ensmusg00000061310 | predicted gene, ENSMUSG00000061310                                                                                                |
| ensmusg00000076783 | T-cell receptor alpha, variable 8                                                                                                 |
| epr1               | epsin 1                                                                                                                           |
| eraf               | alpha hemoglobin stabilizing protein                                                                                              |
| ermp1              | endoplasmic reticulum metalloproteinase 1                                                                                         |
| etfa               | predicted gene 2893; electron transferring flavoprotein, alpha polypeptide                                                        |
| etn1               | early transposon element 1                                                                                                        |
| etv2               | similar to ETS related protein 71; ets variant gene 2                                                                             |
| fars2              | phenylalanine-tRNA synthetase 2 (mitochondrial)                                                                                   |
| farsa              | phenylalanyl-tRNA synthetase, alpha subunit                                                                                       |
| farsb              | phenylalanyl-tRNA synthetase, beta subunit                                                                                        |
| fermt3             | fermitin family homolog 3 (Drosophila)                                                                                            |
| ffar1              | free fatty acid receptor 1                                                                                                        |
| fgfr1op2           | FGFR1 oncogene partner 2; similar to FGFR1 oncogene partner 2; predicted gene 12312                                               |
| figla              | folliculogenesis specific basic helix-loop-helix                                                                                  |
| fiz1               | Flt3 interacting zinc finger protein 1                                                                                            |
| fnta               | farnesyltransferase, CAAX box, alpha; similar to farnesyltransferase alpha subunit                                                |
| fntb               | similar to farnesyltransferase, CAAX box, beta; farnesyltransferase, CAAX box, beta                                               |
| foxa3              | forkhead box A3                                                                                                                   |
| fpr1               | formyl peptide receptor 1                                                                                                         |
| fpr2               | formyl peptide receptor 2                                                                                                         |
| fpr3               | formyl peptide receptor 3                                                                                                         |
| fpr-rs3            | formyl peptide receptor, related sequence 3                                                                                       |
| fpr-rs4            | formyl peptide receptor, related sequence 4                                                                                       |
| fpr-rs6            | formyl peptide receptor, related sequence 6                                                                                       |
| fscn2              | fascin homolog 2, actin-bundling protein, retinal (Strongylocentrotus purpuratus)                                                 |
| fshb               | follicle stimulating hormone beta                                                                                                 |
| fshr               | follicle stimulating hormone receptor                                                                                             |
| fut4-ps1           | fucosyltransferase 4, pseudogene 1                                                                                                |
| fxyd2              | FXD domain-containing ion transport regulator 2                                                                                   |
| fxyd4              | FXD domain-containing ion transport regulator 4                                                                                   |
| fxyd7              | FXD domain-containing ion transport regulator 7                                                                                   |
| fyn                | Fyn proto-oncogene                                                                                                                |
| g6pc2              | glucose-6-phosphatase, catalytic, 2                                                                                               |
| gabpa              | GA repeat binding protein, alpha                                                                                                  |
| gabpb1             | GA repeat binding protein, beta 1                                                                                                 |
| gabra2             | gamma-aminobutyric acid (GABA) A receptor, subunit alpha 2                                                                        |
| gabra3             | gamma-aminobutyric acid (GABA) A receptor, subunit alpha 3                                                                        |
| gabra4             | gamma-aminobutyric acid (GABA) A receptor, subunit alpha 4                                                                        |
| gabra5             | gamma-aminobutyric acid (GABA) A receptor, subunit alpha 5                                                                        |
| gabra6             | gamma-aminobutyric acid (GABA) A receptor, subunit alpha 6                                                                        |
| gabbr1             | gamma-aminobutyric acid (GABA) A receptor, subunit beta 1                                                                         |
| gabbr2             | gamma-aminobutyric acid (GABA) A receptor, subunit beta 2                                                                         |
| gabbr3             | gamma-aminobutyric acid (GABA) A receptor, subunit beta 3                                                                         |
| gabrd              | gamma-aminobutyric acid (GABA) A receptor, subunit delta                                                                          |
| gabre              | similar to gamma-aminobutyric acid (GABA-A) receptor, subunit epsilon; gamma-aminobutyric acid (GABA) A receptor, subunit epsilon |
| gabrg1             | gamma-aminobutyric acid (GABA) A receptor, subunit gamma 1                                                                        |
| gabrg2             | gamma-aminobutyric acid (GABA) A receptor, subunit gamma 2                                                                        |
| gabrg3             | gamma-aminobutyric acid (GABA) A receptor, subunit gamma 3                                                                        |
| gabrp              | gamma-aminobutyric acid (GABA) A receptor, pi                                                                                     |
| gabrq              | gamma-aminobutyric acid (GABA) A receptor, subunit theta                                                                          |
| gabrr2             | gamma-aminobutyric acid (GABA) C receptor, subunit rho 2                                                                          |
| gabrr3             | gamma-aminobutyric acid (GABA) receptor, rho 3                                                                                    |
| gal3st2            | predicted gene 9994; galactose-3-O-sulfotransferase 2                                                                             |

|          |                                                                                                                     |
|----------|---------------------------------------------------------------------------------------------------------------------|
| gal3st3  | galactose-3-O-sulfotransferase 3                                                                                    |
| gal3st4  | galactose-3-O-sulfotransferase 4                                                                                    |
| galm     | galactose mutarotase                                                                                                |
| galnt11  | UDP-N-acetyl-alpha-D-galactosamine:polypeptide N-acetylgalactosaminyltransferase 11                                 |
| ganab    | alpha glucosidase 2 alpha neutral subunit                                                                           |
| gcgr     | glucagon receptor                                                                                                   |
| gcnt1    | glucosaminyl (N-acetyl) transferase 1, core 2; similar to glucosaminyl (N-acetyl) transferase 1, core 2             |
| gda      | guanine deaminase                                                                                                   |
| gdf9     | growth differentiation factor 9                                                                                     |
| gdi2     | predicted gene 4973; guanosine diphosphate (GDP) dissociation inhibitor 2                                           |
| gipc3    | GIPC PDZ domain containing family, member 3                                                                         |
| gja6     | gap junction protein, alpha 6                                                                                       |
| glra2    | glycine receptor, alpha 2 subunit                                                                                   |
| glra3    | glycine receptor, alpha 3 subunit                                                                                   |
| glra4    | glycine receptor, alpha 4 subunit                                                                                   |
| glrb     | glycine receptor, beta subunit                                                                                      |
| glt25d1  | glycosyltransferase 25 domain containing 1                                                                          |
| glt25d2  | glycosyltransferase 25 domain containing 2                                                                          |
| gluchos1 | glucose homeostasis QTL 1                                                                                           |
| glycam1  | glycosylation dependent cell adhesion molecule 1                                                                    |
| gm1220   | gene model 1220, (NCBI)                                                                                             |
| gm1848   | predicted gene 1848                                                                                                 |
| gm2a     | GM2 ganglioside activator protein                                                                                   |
| gm75     | epididymal protein 3B                                                                                               |
| gmppa    | GDP-mannose pyrophosphorylase A                                                                                     |
| gmppb    | GDP-mannose pyrophosphorylase B                                                                                     |
| gna14    | guanine nucleotide binding protein, alpha 14                                                                        |
| gna15    | guanine nucleotide binding protein, alpha 15                                                                        |
| gnal     | guanine nucleotide binding protein, alpha stimulating, olfactory type                                               |
| gnat1    | guanine nucleotide binding protein, alpha transducing 1                                                             |
| gnat2    | guanine nucleotide binding protein, alpha transducing 2                                                             |
| gnat3    | guanine nucleotide binding protein, alpha transducing 3                                                             |
| gnaz     | guanine nucleotide binding protein, alpha z subunit                                                                 |
| gnb1     | guanine nucleotide binding protein (G protein), beta 1                                                              |
| gnb1-ps2 | guanine nucleotide binding protein (G protein), beta 1, pseudogene 2                                                |
| gnb1-ps3 | guanine nucleotide binding protein (G protein), beta 1, pseudogene 3                                                |
| gnb2     | guanine nucleotide binding protein (G protein), beta 2                                                              |
| gnb2l1   | guanine nucleotide binding protein (G protein), beta polypeptide 2 like 1                                           |
| gnb3     | guanine nucleotide binding protein (G protein), beta 3                                                              |
| gnb4     | guanine nucleotide binding protein (G protein), beta 4                                                              |
| gnb5     | guanine nucleotide binding protein (G protein), beta 5                                                              |
| gng10    | guanine nucleotide binding protein (G protein), gamma 10                                                            |
| gng11    | guanine nucleotide binding protein (G protein), gamma 11                                                            |
| gng12    | guanine nucleotide binding protein (G protein), gamma 12                                                            |
| gng13    | guanine nucleotide binding protein (G protein), gamma 13                                                            |
| gng2     | guanine nucleotide binding protein (G protein), gamma 2                                                             |
| gng3     | guanine nucleotide binding protein (G protein), gamma 3                                                             |
| gng4     | guanine nucleotide binding protein (G protein), gamma 4                                                             |
| gng5     | guanine nucleotide binding protein (G protein), gamma 5                                                             |
| gng7     | guanine nucleotide binding protein (G protein), gamma 7                                                             |
| gng8     | guanine nucleotide binding protein (G protein), gamma 8                                                             |
| gngt1    | guanine nucleotide binding protein (G protein), gamma transducing activity polypeptide 1                            |
| gngt2    | guanine nucleotide binding protein (G protein), gamma transducing activity polypeptide 2                            |
| gnptab   | N-acetylglucosamine-1-phosphate transferase, alpha and beta subunits                                                |
| gnptg    | similar to N-acetylglucosamine-1-phosphotransferase, gamma subunit; N-acetylglucosamine-1-phosphotransferase, gamma |

|         |                                                                                                                |
|---------|----------------------------------------------------------------------------------------------------------------|
|         | subunit                                                                                                        |
| gnrhr   | gonadotropin releasing hormone receptor                                                                        |
| gpha2   | glycoprotein hormone alpha 2                                                                                   |
| gphb5   | glycoprotein hormone beta 5                                                                                    |
| gphn    | gephyrin                                                                                                       |
| gpr110  | G protein-coupled receptor 110                                                                                 |
| gpr111  | G protein-coupled receptor 111                                                                                 |
| gpr116  | G protein-coupled receptor 116                                                                                 |
| gpr123  | G protein-coupled receptor 123                                                                                 |
| gpr128  | G protein-coupled receptor 128                                                                                 |
| gpr135  | G protein-coupled receptor 135                                                                                 |
| gpr141  | G protein-coupled receptor 141                                                                                 |
| gpr142  | G protein-coupled receptor 142                                                                                 |
| gpr156  | G protein-coupled receptor 156                                                                                 |
| gpr160  | G protein-coupled receptor 160                                                                                 |
| gpr177  | G protein-coupled receptor 177                                                                                 |
| gpr20   | G protein-coupled receptor 20                                                                                  |
| gpr26   | G protein-coupled receptor 26                                                                                  |
| gpr3    | G-protein coupled receptor 3                                                                                   |
| gpr31c  | predicted gene 8593; predicted gene 6553; predicted gene 6544; G protein-coupled receptor 31, D17Leh66c region |
| gpr33   | G protein-coupled receptor 33                                                                                  |
| gpr34   | G protein-coupled receptor 34                                                                                  |
| gpr45   | G protein-coupled receptor 45                                                                                  |
| gpr61   | G protein-coupled receptor 61                                                                                  |
| gpr63   | G protein-coupled receptor 63                                                                                  |
| gpr75   | G protein-coupled receptor 75                                                                                  |
| gprin2  | G protein regulated inducer of neurite outgrowth 2                                                             |
| gprin3  | GPRIN family member 3                                                                                          |
| gpsm3   | G-protein signalling modulator 3 (AGS3-like, C. elegans)                                                       |
| grk1    | similar to rhodopsin kinase; G protein-coupled receptor kinase 1                                               |
| grk4    | G protein-coupled receptor kinase 4                                                                            |
| grk5    | G protein-coupled receptor kinase 5                                                                            |
| grk6    | G protein-coupled receptor kinase 6                                                                            |
| grm6    | glutamate receptor, metabotropic 6                                                                             |
| gsta    | glutathione S-transferase cluster                                                                              |
| gsta3   | glutathione S-transferase, alpha 3                                                                             |
| gtf2a1  | predicted gene 5435; general transcription factor II A, 1                                                      |
| gtf2a2  | similar to TFIIA small subunit; general transcription factor II A, 2                                           |
| gtf3a   | general transcription factor III A                                                                             |
| gtf3c1  | general transcription factor III C 1                                                                           |
| gtf3c2  | general transcription factor IIIC, polypeptide 2, beta; Mpv17 transgene, kidney disease mutant                 |
| gtf3c6  | general transcription factor IIIC, polypeptide 6, alpha                                                        |
| guca1a  | guanylate cyclase activator 1a (retina)                                                                        |
| guca1b  | guanylate cyclase activator 1B                                                                                 |
| gucy1a2 | hypothetical protein LOC100044212; guanylate cyclase 1, soluble, alpha 2                                       |
| gucy1a3 | guanylate cyclase 1, soluble, alpha 3                                                                          |
| gucy1b2 | similar to guanylate cyclase 1, soluble, beta 2; guanylate cyclase 1, soluble, beta 2                          |
| gucy1b3 | guanylate cyclase 1, soluble, beta 3                                                                           |
| gucy2e  | guanylate cyclase 2e                                                                                           |
| gucy2f  | guanylate cyclase 2f                                                                                           |
| h2-dmb2 | histocompatibility 2, class II, locus Mb2                                                                      |
| h2-eb2  | histocompatibility 2, class II antigen E beta2                                                                 |
| h2-gs10 | MHC class I like protein GS10                                                                                  |
| h2-i    | H2 I region, includes H2-Aa, Ab, BI, Ea, Eb, Eb2, Ob, Pb                                                       |
| h2-k2   | histocompatibility 2, K region locus 2                                                                         |

|           |                                                                                                                                                           |
|-----------|-----------------------------------------------------------------------------------------------------------------------------------------------------------|
| h2-ob     | histocompatibility 2, O region beta locus                                                                                                                 |
| h2-pb     | histocompatibility 2, P region beta locus                                                                                                                 |
| h2-q11    | histocompatibility 2, Q region locus 11                                                                                                                   |
| h2-q5     | histocompatibility 2, Q region locus 5                                                                                                                    |
| h2-q9     | histocompatibility 2, Q region locus 1; histocompatibility 2, Q region locus 9                                                                            |
| h2-t10    | histocompatibility 2, T region locus 10                                                                                                                   |
| h2-t18    | histocompatibility 2, T region locus 18                                                                                                                   |
| h2-t22    | histocompatibility 2, T region locus 22                                                                                                                   |
| h2-t3     | histocompatibility 2, T region locus 3                                                                                                                    |
| h2-t9     | histocompatibility 2, T region locus 9                                                                                                                    |
| h3        | histocompatibility 3                                                                                                                                      |
| h36       | histocompatibility 36                                                                                                                                     |
| h8        | histocompatibility 8                                                                                                                                      |
| hadhb     | hydroxyacyl-Coenzyme A dehydrogenase/3-ketoacyl-Coenzyme A thiolase/enoyl-Coenzyme A hydratase (trifunctional protein), beta subunit; predicted gene 9108 |
| hba-x     | hemoglobin X, alpha-like embryonic chain in Hba complex                                                                                                   |
| hbb-b2    | hemoglobin, beta adult major chain; hemoglobin, beta adult minor chain                                                                                    |
| hbb-bh0   | hemoglobin Z, beta-like embryonic chain; hypothetical protein LOC100044263; hemoglobin, beta, pseudogene bh0                                              |
| hbb-bh1   | hemoglobin Z, beta-like embryonic chain; hypothetical protein LOC100044263; hemoglobin, beta, pseudogene bh0                                              |
| hbb-bh2   | hemoglobin beta, pseudogene bh2                                                                                                                           |
| hbb-bh3   | hemoglobin beta, pseudogene bh3                                                                                                                           |
| hbb-y     | similar to beta-globin; hemoglobin Y, beta-like embryonic chain                                                                                           |
| hbq1      | hemoglobin, theta 1                                                                                                                                       |
| hc11      | heterochromatin, Chr 11                                                                                                                                   |
| hc8       | heterochromatin, Chr 8                                                                                                                                    |
| hebp1     | heme binding protein 1                                                                                                                                    |
| hectd3    | HECT domain containing 3                                                                                                                                  |
| hecw1     | HECT, C2 and WW domain containing E3 ubiquitin protein ligase 1                                                                                           |
| hecw2     | HECT, C2 and WW domain containing E3 ubiquitin protein ligase 2                                                                                           |
| herc5     | hect domain and RLD 5                                                                                                                                     |
| hexa      | hexosaminidase A                                                                                                                                          |
| hexb      | hexosaminidase B                                                                                                                                          |
| higd1a    | HIG1 domain family, member 1A                                                                                                                             |
| hist1h2aj | histone cluster 1, H2aj                                                                                                                                   |
| hist3h2ba | histone cluster 3, H2ba; histone cluster 3, H2bb                                                                                                          |
| hivep1    | human immunodeficiency virus type I enhancer binding protein 1                                                                                            |
| hnf4g     | hepatocyte nuclear factor 4, gamma                                                                                                                        |
| hras1-ps1 | Harvey rat sarcoma virus oncogene, pseudogene 1                                                                                                           |
| hrdg1     | hyperoxia-induced retinal degeneration 1                                                                                                                  |
| hsd3b2    | hydroxy-delta-5-steroid dehydrogenase, 3 beta- and steroid delta-isomerase 2                                                                              |
| hsd3b3    | hydroxy-delta-5-steroid dehydrogenase, 3 beta- and steroid delta-isomerase 3                                                                              |
| hsd3b5    | hydroxy-delta-5-steroid dehydrogenase, 3 beta- and steroid delta-isomerase 5                                                                              |
| htr1e     | 5-hydroxytryptamine (serotonin) receptor 1E                                                                                                               |
| htr2a     | 5-hydroxytryptamine (serotonin) receptor 2A                                                                                                               |
| htr2c     | 5-hydroxytryptamine (serotonin) receptor 2C                                                                                                               |
| htr4      | 5 hydroxytryptamine (serotonin) receptor 4                                                                                                                |
| htr5b     | 5-hydroxytryptamine (serotonin) receptor 5B                                                                                                               |
| hug       | hugger                                                                                                                                                    |
| icam4     | intercellular adhesion molecule 4, Landsteiner-Wiener blood group                                                                                         |
| ichs      | immediate cutaneous hypersensitivity QTL                                                                                                                  |
| idd1      | insulin dependent diabetes susceptibility 1                                                                                                               |
| idd13     | insulin dependent diabetes susceptibility 13                                                                                                              |
| idh3a     | isocitrate dehydrogenase 3 (NAD+) alpha                                                                                                                   |
| idh3b     | isocitrate dehydrogenase 3 (NAD+) beta                                                                                                                    |
| idh3g     | isocitrate dehydrogenase 3 (NAD+), gamma                                                                                                                  |

|           |                                                                                                                                          |
|-----------|------------------------------------------------------------------------------------------------------------------------------------------|
| if1       | NDV-induced circulating interferon                                                                                                       |
| ifi201    | interferon activated gene 201                                                                                                            |
| ifna1     | interferon alpha 1                                                                                                                       |
| ifna10    | interferon alpha 10                                                                                                                      |
| ifna2     | interferon alpha 2                                                                                                                       |
| ifna3     | interferon alpha 3                                                                                                                       |
| ifna4     | interferon alpha 4                                                                                                                       |
| ifna5     | interferon alpha 5                                                                                                                       |
| ifna6     | interferon alpha 6                                                                                                                       |
| ifna7     | interferon alpha 7                                                                                                                       |
| ifna9     | interferon alpha 9                                                                                                                       |
| ifnab     | interferon alpha B                                                                                                                       |
| ifna-ps1  | interferon alpha gene, pseudogene 1                                                                                                      |
| ifnar2    | interferon (alpha and beta) receptor 2                                                                                                   |
| ifnz      | interferon zeta                                                                                                                          |
| ift122    | intraflagellar transport 122 homolog (Chlamydomonas)                                                                                     |
| ift140    | intraflagellar transport 140 homolog (Chlamydomonas)                                                                                     |
| igbl      | immunoglobulin-associated beta-like complex                                                                                              |
| igbp1     | immunoglobulin (CD79A) binding protein 1                                                                                                 |
| igh-1b    | similar to gamma-2a immunoglobulin heavy chain; immunoglobulin heavy chain 1a (serum IgG2a); immunoglobulin heavy chain 1b (serum IgG2c) |
| ighg      | immunoglobulin heavy chain 3 (serum IgG2b); Immunoglobulin heavy chain (gamma polypeptide)                                               |
| igh-ia    | immunoglobulin heavy chain Ia                                                                                                            |
| igh-sa1   | immunoglobulin heavy chain Sa1                                                                                                           |
| igk-v5    | immunoglobulin kappa chain variable 5 (V5 family)                                                                                        |
| il11ra2   | interleukin 11 receptor, alpha chain 2; predicted gene 13305; predicted gene, 100038993                                                  |
| il3ra     | interleukin 3 receptor, alpha chain                                                                                                      |
| il5ra     | interleukin 5 receptor, alpha                                                                                                            |
| il8ra     | chemokine (C-X-C motif) receptor 2                                                                                                       |
| il8rb     | chemokine (C-X-C motif) receptor 2                                                                                                       |
| iltifb    | interleukin 10-related T cell-derived inducible factor beta; interleukin 22                                                              |
| impdh1    | inosine 5'-phosphate dehydrogenase 1                                                                                                     |
| impg1     | interphotoreceptor matrix proteoglycan 1                                                                                                 |
| impg2     | interphotoreceptor matrix proteoglycan 2                                                                                                 |
| in(4)56rk | inversion, Chr 4, Roderick 56                                                                                                            |
| inhbb     | inhibin beta-B                                                                                                                           |
| inhbc     | inhibin beta-C                                                                                                                           |
| inhbe     | inhibin beta E                                                                                                                           |
| inpp4b    | inositol polyphosphate-4-phosphatase, type II                                                                                            |
| insl3     | insulin-like 3                                                                                                                           |
| ipo13     | importin 13                                                                                                                              |
| ipo4      | importin 4                                                                                                                               |
| ipo5      | hypothetical protein LOC100044315; importin 5                                                                                            |
| ipo7      | importin 7                                                                                                                               |
| ipo8      | importin 8                                                                                                                               |
| ipo9      | importin 9                                                                                                                               |
| ir8       | immune response 8                                                                                                                        |
| irf9      | interferon regulatory factor 9                                                                                                           |
| itch      | itchy, E3 ubiquitin protein ligase                                                                                                       |
| itga1     | integrin alpha 1                                                                                                                         |
| itga10    | integrin, alpha 10                                                                                                                       |
| itga11    | integrin alpha 11                                                                                                                        |
| itga7     | integrin alpha 7                                                                                                                         |
| itga8     | integrin alpha 8                                                                                                                         |
| itga9     | integrin alpha 9                                                                                                                         |

|              |                                                                                                                    |
|--------------|--------------------------------------------------------------------------------------------------------------------|
| itgad        | integrin, alpha D                                                                                                  |
| itgae        | integrin alpha E, epithelial-associated                                                                            |
| itgb1bp1     | integrin beta 1 binding protein 1                                                                                  |
| itgb1bp2     | integrin beta 1 binding protein 2                                                                                  |
| itgb1bp3     | integrin beta 1 binding protein 3                                                                                  |
| itgb2l       | integrin beta 2-like                                                                                               |
| itgb3bp      | predicted gene 3507; integrin beta 3 binding protein (beta3-endonexin); similar to integrin beta 3 binding protein |
| itgb5        | integrin beta 5                                                                                                    |
| itgb6        | integrin beta 6                                                                                                    |
| itgb7        | integrin beta 7                                                                                                    |
| itgb8        | integrin beta 8                                                                                                    |
| itgb1        | integrin, beta-like 1                                                                                              |
| kbtbd8       | kelch repeat and BTB (POZ) domain containing 8                                                                     |
| kcnab1       | potassium voltage-gated channel, shaker-related subfamily, beta member 1                                           |
| kcnab2       | potassium voltage-gated channel, shaker-related subfamily, beta member 2                                           |
| kcnab3       | potassium voltage-gated channel, shaker-related subfamily, beta member 3                                           |
| kcng2        | potassium voltage-gated channel, subfamily G, member 2                                                             |
| kcnmb2       | potassium large conductance calcium-activated channel, subfamily M, beta member 2                                  |
| kcnmb4       | potassium large conductance calcium-activated channel, subfamily M, beta member 4                                  |
| kcns1        | K+ voltage-gated channel, subfamily S, 1                                                                           |
| kcns2        | K+ voltage-gated channel, subfamily S, 2                                                                           |
| kcnu1        | potassium channel, subfamily U, member 1                                                                           |
| kcnu2        | potassium channel, subfamily V, member 2                                                                           |
| kctd13       | potassium channel tetramerisation domain containing 13                                                             |
| kctd2        | potassium channel tetramerisation domain containing 2                                                              |
| kif3a        | kinesin family member 3A                                                                                           |
| kifc3        | kinesin family member C3                                                                                           |
| klhl7        | kelch-like 7 (Drosophila)                                                                                          |
| klk1b11      | kallikrein 1-related peptidase b11                                                                                 |
| klk1b8       | kallikrein 1-related peptidase b8                                                                                  |
| kpna1        | karyopherin (importin) alpha 1                                                                                     |
| kpna2        | karyopherin (importin) alpha 2                                                                                     |
| kpna3        | karyopherin (importin) alpha 3                                                                                     |
| kpnb1        | karyopherin (importin) beta 1                                                                                      |
| krtap8-1     | keratin associated protein 8-1                                                                                     |
| l1md-a1      | L1 repeat, A subfamily, member 1                                                                                   |
| lama4        | laminin, alpha 4                                                                                                   |
| lamb2        | laminin, beta 2                                                                                                    |
| lamc3        | laminin gamma 3                                                                                                    |
| lamr1-rs5    | laminin receptor 1 (ribosomal protein SA), related sequence 5                                                      |
| lca5         | Leber congenital amaurosis 5 (human)                                                                               |
| lca5l        | Leber congenital amaurosis 5-like                                                                                  |
| lcn13        | lipocalin 13                                                                                                       |
| leprel2      | leprecan-like 2                                                                                                    |
| lgr4         | leucine-rich repeat-containing G protein-coupled receptor 4                                                        |
| lgr6         | leucine-rich repeat-containing G protein-coupled receptor 6                                                        |
| lhb          | luteinizing hormone beta                                                                                           |
| lhcgr        | luteinizing hormone/choriogonadotropin receptor                                                                    |
| loc100034726 | predicted gene 15772                                                                                               |
| loc100042493 | chemokine (C-C motif) ligand 21B (leucine)                                                                         |
| loc100043207 | amylase 2a1                                                                                                        |
| loc381763    | T-cell receptor beta chain V region                                                                                |
| loc381765    | similar to T cell antigen receptor                                                                                 |
| loc383420    | predicted gene 5241                                                                                                |
| loc383650    | proteasome (prosome, macropain) subunit, beta type 6, pseudogene 2                                                 |

|           |                                                                                                                                                |
|-----------|------------------------------------------------------------------------------------------------------------------------------------------------|
| loc433466 | jumonji domain containing 7                                                                                                                    |
| loc636017 | immunoglobulin heavy chain                                                                                                                     |
| loc641050 | hypothetical protein LOC641050                                                                                                                 |
| loc665506 | similar to T-cell receptor beta-2 chain C region                                                                                               |
| loc676689 | similar to H-2 class I histocompatibility antigen, L-D alpha chain precursor                                                                   |
| lrat      | lecithin-retinol acyltransferase (phosphatidylcholine-retinol-O-acyltransferase)                                                               |
| lrdg1     | light induced retinal degeneration 1                                                                                                           |
| lrdg2     | light induced retinal degeneration 2                                                                                                           |
| lrit1     | leucine-rich repeat, immunoglobulin-like and transmembrane domains 1                                                                           |
| lsr       | lipolysis stimulated lipoprotein receptor                                                                                                      |
| ltb4r1    | leukotriene B4 receptor 1                                                                                                                      |
| ltbp1     | latent transforming growth factor beta binding protein 1                                                                                       |
| ltbp3     | latent transforming growth factor beta binding protein 3                                                                                       |
| ly23      | lymphocyte antigen 23                                                                                                                          |
| ly7       | lymphocyte antigen 7                                                                                                                           |
| ly77      | lymphocyte antigen 77                                                                                                                          |
| m-01983   | DNA segment, M-01983                                                                                                                           |
| madcam1   | mucosal vascular addressin cell adhesion molecule 1                                                                                            |
| mafa      | v-maf musculoaponeurotic fibrosarcoma oncogene family, protein A (avian)                                                                       |
| man1a2    | mannosidase, alpha, class 1A, member 2                                                                                                         |
| man1b-rs  | mannosidase 1, beta, related sequence                                                                                                          |
| map2k4    | mitogen-activated protein kinase kinase 4                                                                                                      |
| map2k7    | predicted gene 14378; similar to transforming growth factor, beta receptor III (betaglycan, 300kDa); mitogen-activated protein kinase kinase 7 |
| map3k5    | mitogen-activated protein kinase kinase kinase 5; similar to mitogen activated protein kinase kinase kinase 5                                  |
| map3k6    | mitogen-activated protein kinase kinase kinase 6                                                                                               |
| mapbbip   | late endosomal/lysosomal adaptor, MAPK and MTOR activator 2                                                                                    |
| mapk10    | mitogen-activated protein kinase 10                                                                                                            |
| mapk13    | mitogen-activated protein kinase 13                                                                                                            |
| mapk8ip1  | mitogen-activated protein kinase 8 interacting protein 1                                                                                       |
| mapk8ip2  | mitogen-activated protein kinase 8 interacting protein 2                                                                                       |
| mapk8ip3  | mitogen-activated protein kinase 8 interacting protein 3                                                                                       |
| mat2a     | methionine adenosyltransferase II, alpha                                                                                                       |
| mat2b     | methionine adenosyltransferase II, beta                                                                                                        |
| mccc1     | methylcrotonoyl-Coenzyme A carboxylase 1 (alpha)                                                                                               |
| mccc2     | methylcrotonoyl-Coenzyme A carboxylase 2 (beta)                                                                                                |
| mcg_21548 | brain expressed, associated with Nedd4, 1                                                                                                      |
| mdm1      | transformed mouse 3T3 cell double minute 1                                                                                                     |
| mdm2      | transformed mouse 3T3 cell double minute 2                                                                                                     |
| mdm3      | transformed mouse 3T3 cell double minute 3                                                                                                     |
| med6      | mediator of RNA polymerase II transcription, subunit 6 homolog (yeast)                                                                         |
| mep1a     | mepriin 1 alpha                                                                                                                                |
| mep1b     | mepriin 1 beta                                                                                                                                 |
| mgat3     | mannoside acetylglucosaminyltransferase 3                                                                                                      |
| mgat4a    | mannoside acetylglucosaminyltransferase 4, isoenzyme A                                                                                         |
| mgat5b    | mannoside acetylglucosaminyltransferase 5, isoenzyme B                                                                                         |
| mirn30d   |                                                                                                                                                |
| mobkl2b   | MOB1, Mps One Binder kinase activator-like 2B (yeast)                                                                                          |
| mord2     | modifier of retinal degeneration 2                                                                                                             |
| mord3     | modifier of retinal degeneration 3                                                                                                             |
| mom4      | MORN repeat containing 4                                                                                                                       |
| moxd2     | monooxygenase, DBH-like 2                                                                                                                      |
| mpmv14    | modified polytropic murine leukemia virus 14                                                                                                   |
| mpp4      | membrane protein, palmitoylated 4 (MAGUK p55 subfamily member 4)                                                                               |
| mr1       | major histocompatibility complex, class I-related                                                                                              |

|           |                                                                                                                                                                         |
|-----------|-------------------------------------------------------------------------------------------------------------------------------------------------------------------------|
| mrgprb2   | MAS-related GPR, member B2                                                                                                                                              |
| mrgpre    | MAS-related GPR, member E                                                                                                                                               |
| mrps31    | mitochondrial ribosomal protein S31                                                                                                                                     |
| mrto4     | predicted gene 9178; MRT4, mRNA turnover 4, homolog ( <i>S. cerevisiae</i> ); predicted gene 5633                                                                       |
| ms15-9    | minisatellite 15-9                                                                                                                                                      |
| ms4a3     | membrane-spanning 4-domains, subfamily A, member 3                                                                                                                      |
| ms4a5     | membrane-spanning 4-domains, subfamily A, member 5                                                                                                                      |
| mtv1      | mammary tumor virus locus 1                                                                                                                                             |
| mtv11     | mammary tumor virus locus 11                                                                                                                                            |
| mtv2      | mammary tumor virus locus 2                                                                                                                                             |
| mtv3      | mammary tumor virus locus 3                                                                                                                                             |
| mtv43     | mammary tumor virus locus 43                                                                                                                                            |
| mtv48     | mammary tumor virus locus 48                                                                                                                                            |
| mtv50     | mammary tumor virus locus 50                                                                                                                                            |
| mtv51     | mammary tumor virus locus 51                                                                                                                                            |
| mtv6      | mammary tumor virus locus 6                                                                                                                                             |
| mtv7      | mammary tumor virus locus 7                                                                                                                                             |
| mtv8      | mammary tumor virus locus 8                                                                                                                                             |
| mtv9      | mammary tumor virus locus 9                                                                                                                                             |
| mug1      | murinoglobulin 1; predicted gene 7298                                                                                                                                   |
| mug4      | murinoglobulin 4                                                                                                                                                        |
| mug-ps1   | murinoglobulin, pseudogene 1                                                                                                                                            |
| mynf1     | myeloid nuclear factor 1                                                                                                                                                |
| myo3b     | myosin IIIB                                                                                                                                                             |
| n4bp1     | NEDD4 binding protein 1                                                                                                                                                 |
| naca      | nascent polypeptide-associated complex alpha polypeptide                                                                                                                |
| ncaph2    | non-SMC condensin II complex, subunit H2                                                                                                                                |
| ncoa7     | nuclear receptor coactivator 7                                                                                                                                          |
| ndfip1    | Nedd4 family interacting protein 1; similar to Nedd4 WW domain-binding protein 5                                                                                        |
| ndfip2    | Nedd4 family interacting protein 2                                                                                                                                      |
| ndufb4    | NADH dehydrogenase (ubiquinone) 1 beta subcomplex 4; predicted gene 3873; predicted gene 3244                                                                           |
| ndufb5    | NADH dehydrogenase (ubiquinone) 1 beta subcomplex, 5                                                                                                                    |
| ndufc1    | predicted gene 4237; NADH dehydrogenase (ubiquinone) 1, subcomplex unknown, 1                                                                                           |
| necap1    | NECAP endocytosis associated 1                                                                                                                                          |
| necap2    | NECAP endocytosis associated 2                                                                                                                                          |
| nedd4     | neural precursor cell expressed, developmentally down-regulated 4                                                                                                       |
| neurl2    | neuralized-like 2 ( <i>Drosophila</i> )                                                                                                                                 |
| nfrkb     | nuclear factor related to kappa B binding protein                                                                                                                       |
| ng23      | Ng23 protein                                                                                                                                                            |
| nidd1n    | non-insulin-dependent diabetes mellitus 1 in NSY                                                                                                                        |
| nkain1    | Na <sup>+</sup> /K <sup>+</sup> transporting ATPase interacting 1                                                                                                       |
| nkain2    | Na <sup>+</sup> /K <sup>+</sup> transporting ATPase interacting 2                                                                                                       |
| nkain3    | Na <sup>+</sup> /K <sup>+</sup> transporting ATPase interacting 3                                                                                                       |
| nkain4    | Na <sup>+</sup> /K <sup>+</sup> transporting ATPase interacting 4                                                                                                       |
| nme2      | non-metastatic cells 2, protein (NM23B) expressed in; predicted gene 5566; predicted gene 5425; similar to Nucleoside diphosphate kinase B (NDK B) (NDP kinase B) (P18) |
| nme7      | non-metastatic cells 7, protein expressed in (nucleoside-diphosphate kinase)                                                                                            |
| npnt      | nephronectin                                                                                                                                                            |
| nr        | nervous                                                                                                                                                                 |
| nr1d2     | nuclear receptor subfamily 1, group D, member 2; predicted gene 5827                                                                                                    |
| nr1d2-rs2 | nuclear receptor subfamily 1, group D, member 2, related sequence 2                                                                                                     |
| nr2e3     | nuclear receptor subfamily 2, group E, member 3                                                                                                                         |
| nrl       | neural retina leucine zipper gene                                                                                                                                       |
| nub1      | negative regulator of ubiquitin-like proteins 1                                                                                                                         |
| nup93     | similar to nucleoporin 93; nucleoporin 93                                                                                                                               |



|                     |                                                                                                  |
|---------------------|--------------------------------------------------------------------------------------------------|
| nup1                | nucleoporin like 1                                                                               |
| nus1                | nuclear undecaprenyl pyrophosphate synthase 1 homolog ( <i>S. cerevisiae</i> )                   |
| nutf2               | nuclear transport factor 2                                                                       |
| nxn1                | similar to Thioredoxin-like 6; nucleoredoxin-like 1                                              |
| nxn2                | nucleoredoxin-like 2                                                                             |
| nyx                 | nyctalopin                                                                                       |
| obfc1               | oligonucleotide/oligosaccharide-binding fold containing 1                                        |
| odc-rs9             | ornithine decarboxylase, related sequence 9                                                      |
| olfr1310            | olfactory receptor 1310                                                                          |
| olfr1342            | olfactory receptor 1342                                                                          |
| olfr410             | olfactory receptor 410                                                                           |
| olfr412             | olfactory receptor 412                                                                           |
| olfr461             | olfactory receptor 461                                                                           |
| olfr553             | olfactory receptor 553                                                                           |
| olfr556             | olfactory receptor 556                                                                           |
| olfr557             | olfactory receptor 557                                                                           |
| olfr705             | olfactory receptor 705                                                                           |
| olfr71              | olfactory receptor 71                                                                            |
| olfr850             | olfactory receptor 850                                                                           |
| olfr937             | olfactory receptor 937                                                                           |
| olfr985             | olfactory receptor 985                                                                           |
| onecut1             | one cut domain, family member 1                                                                  |
| oog2                | oogenesis 2                                                                                      |
| oog3                | predicted gene 4350; oogenesis 3                                                                 |
| oog4                | oogenesis 4                                                                                      |
| opn1lw              | opsin 1 (cone pigments), long-wave-sensitive                                                     |
| opn1mw              | opsin 1 (cone pigments), medium-wave-sensitive (color blindness, deutan)                         |
| opn1sw              | opsin 1 (cone pigments), short-wave-sensitive (color blindness, tritan)                          |
| opn3                | opsin 3                                                                                          |
| opn4                | opsin 4 (melanopsin)                                                                             |
| opn5                | opsin 5                                                                                          |
| opr1                | hypothetical protein LOC100044222; opioid receptor, delta 1                                      |
| orf9                | orosomucoid 3                                                                                    |
| orm3                | orosomucoid 3                                                                                    |
| ottmusg00000000246  | predicted gene 11212                                                                             |
| ottmusg000000003947 | predicted gene 11744                                                                             |
| ottmusg000000010328 | predicted gene 13084                                                                             |
| ottmusg000000011275 | predicted gene 13280                                                                             |
| ottmusg000000011291 | predicted gene 13290                                                                             |
| ottmusg000000015025 | predicted gene 13893                                                                             |
| ottmusg000000015050 | T cell receptor alpha variable 9D-4                                                              |
| ottmusg000000015102 | predicted gene 16454                                                                             |
| ottmusg000000015160 | T cell receptor alpha variable 6-3                                                               |
| ottmusg000000015161 | T cell receptor alpha variable 7-4                                                               |
| ottmusg000000015181 | T cell receptor alpha variable 7D-4                                                              |
| ottmusg000000022462 | amylase 2b                                                                                       |
| otud5               | OTU domain containing 5                                                                          |
| oua1                | ouabain resistance 1                                                                             |
| oxgr1               | oxoglutarate (alpha-ketoglutarate) receptor 1                                                    |
| p2ry14              | purinergic receptor P2Y, G-protein coupled, 14                                                   |
| p4ha1               | procollagen-proline, 2-oxoglutarate 4-dioxygenase (proline 4-hydroxylase), alpha 1 polypeptide   |
| p4ha2               | procollagen-proline, 2-oxoglutarate 4-dioxygenase (proline 4-hydroxylase), alpha II polypeptide  |
| p4ha3               | procollagen-proline, 2-oxoglutarate 4-dioxygenase (proline 4-hydroxylase), alpha polypeptide III |
| pafah1b1-ps1        | platelet-activating factor acetylhydrolase, isoform 1b, beta1 subunit, pseudogene 1              |
| pafah1b1-ps2        | platelet-activating factor acetylhydrolase, isoform 1b, beta1 subunit, pseudogene 2              |

|          |                                                                                                     |
|----------|-----------------------------------------------------------------------------------------------------|
| pafah1b2 | platelet-activating factor acetylhydrolase, isoform 1b, subunit 2                                   |
| pafah1b3 | platelet-activating factor acetylhydrolase, isoform 1b, subunit 3                                   |
| pank1    | pantothenate kinase 1                                                                               |
| paqr5    | progesterin and adipoQ receptor family member V                                                     |
| paqr7    | progesterin and adipoQ receptor family member VII                                                   |
| paqr8    | progesterin and adipoQ receptor family member VIII                                                  |
| pax4     | paired box gene 4                                                                                   |
| pcbp3    | poly(rC) binding protein 3                                                                          |
| pcca     | propionyl-Coenzyme A carboxylase, alpha polypeptide                                                 |
| pccb     | propionyl Coenzyme A carboxylase, beta polypeptide                                                  |
| pcdh21   | cadherin-related family member 1                                                                    |
| pcdhga1  | protocadherin gamma subfamily A, 1                                                                  |
| pcolce2  | procollagen C-endopeptidase enhancer 2                                                              |
| pdcd     | phosducin                                                                                           |
| pdcl     | phosducin-like                                                                                      |
| pde4d    | phosphodiesterase 4D, cAMP specific                                                                 |
| pde6a    | phosphodiesterase 6A, cGMP-specific, rod, alpha                                                     |
| pde6b    | phosphodiesterase 6B, cGMP, rod receptor, beta polypeptide                                          |
| pde6c    | phosphodiesterase 6C, cGMP specific, cone, alpha prime                                              |
| pde6d    | phosphodiesterase 6D, cGMP-specific, rod, delta                                                     |
| pde6g    | phosphodiesterase 6G, cGMP-specific, rod, gamma                                                     |
| pde6h    | phosphodiesterase 6H, cGMP-specific, cone, gamma                                                    |
| pdha2    | pyruvate dehydrogenase E1 alpha 2                                                                   |
| pdhb     | predicted gene 6123; pyruvate dehydrogenase (lipoamide) beta                                        |
| pdhx     | pyruvate dehydrogenase complex, component X; similar to pyruvate dehydrogenase complex, component X |
| pggt1b   | protein geranylgeranyltransferase type I, beta subunit                                              |
| phka1    | phosphorylase kinase alpha 1                                                                        |
| phka2    | phosphorylase kinase alpha 2                                                                        |
| phkb     | phosphorylase kinase beta                                                                           |
| phkg1    | phosphorylase kinase gamma 1                                                                        |
| phkg2    | phosphorylase kinase, gamma 2 (testis)                                                              |
| pigz     | phosphatidylinositol glycan anchor biosynthesis, class Z                                            |
| pik3r5   | phosphoinositide-3-kinase, regulatory subunit 5, p101                                               |
| pik3r6   | phosphoinositide-3-kinase, regulatory subunit 6                                                     |
| pip5k1a  | phosphatidylinositol-4-phosphate 5-kinase, type 1 alpha                                             |
| pip5k1c  | phosphatidylinositol-4-phosphate 5-kinase, type 1 gamma                                             |
| pitpnb   | phosphatidylinositol transfer protein, beta                                                         |
| pitpnc1  | phosphatidylinositol transfer protein, cytoplasmic 1                                                |
| pitpnm2  | phosphatidylinositol transfer protein, membrane-associated 2                                        |
| pitpnm3  | PITPNM family member 3                                                                              |
| pkia     | protein kinase inhibitor, alpha                                                                     |
| pkib     | protein kinase inhibitor beta, cAMP dependent, testis specific                                      |
| pla2g4b  | phospholipase A2, group IVB (cytosolic); jumonji domain containing 7                                |
| pla2g4d  | phospholipase A2, group IVD                                                                         |
| pla2g4e  | phospholipase A2, group IVE                                                                         |
| pla2g4f  | phospholipase A2, group IVF                                                                         |
| plcb1    | phospholipase C, beta 1                                                                             |
| plcb2    | phospholipase C, beta 2                                                                             |
| plcb3    | phospholipase C, beta 3                                                                             |
| plcd1    | phospholipase C, delta 1                                                                            |
| plch1    | phospholipase C, eta 1                                                                              |
| plcl1    | phospholipase C-like 1                                                                              |
| plcl2    | phospholipase C-like 2                                                                              |
| plek     | pleckstrin                                                                                          |
| pltr3    | polytropic long terminal repeat containing proviral locus 3                                         |

|            |                                                                                                                                          |
|------------|------------------------------------------------------------------------------------------------------------------------------------------|
| pmpca      | peptidase (mitochondrial processing) alpha                                                                                               |
| pmpcb      | peptidase (mitochondrial processing) beta                                                                                                |
| pmv11      | polytropic murine leukemia virus 11                                                                                                      |
| pmv27      | polytropic murine leukemia virus 27                                                                                                      |
| pnpla8     | patatin-like phospholipase domain containing 8                                                                                           |
| pol        | pol protein                                                                                                                              |
| pola2      | polymerase (DNA directed), alpha 2                                                                                                       |
| pold1      | polymerase (DNA directed), delta 1, catalytic subunit                                                                                    |
| pold2      | polymerase (DNA directed), delta 2, regulatory subunit                                                                                   |
| pold4      | polymerase (DNA-directed), delta 4                                                                                                       |
| pole       | polymerase (DNA directed), epsilon                                                                                                       |
| pole2      | polymerase (DNA directed), epsilon 2 (p59 subunit)                                                                                       |
| polg2      | polymerase (DNA directed), gamma 2, accessory subunit                                                                                    |
| polr2h     | predicted gene 7511; polymerase (RNA) II (DNA directed) polypeptide H                                                                    |
| polr2i     | similar to RNA Polymerase II subunit 14.5 kD; polymerase (RNA) II (DNA directed) polypeptide I                                           |
| polr2k     | polymerase (RNA) II (DNA directed) polypeptide K; similar to polymerase (RNA) II (DNA directed) polypeptide K                            |
| polr2l     | similar to DNA-directed RNA polymerase II 7.6 kDa polypeptide (RPB10) (RPB7.6) (RPABC5); hypothetical protein LOC100044218               |
| pomc-ps1   | pro-opiomelanocortin, pseudogene 1                                                                                                       |
| pomp       | similar to proteasome maturation protein; proteasome maturation protein                                                                  |
| ppap2b     | phosphatidic acid phosphatase type 2B                                                                                                    |
| ppef1      | protein phosphatase with EF hand calcium-binding domain 1                                                                                |
| ppef2      | protein phosphatase, EF hand calcium-binding domain 2                                                                                    |
| ppfibp1    | PTPRF interacting protein, binding protein 1 (liprin beta 1); similar to mKIAA1230 protein                                               |
| ppm1b      | similar to serine/threonine phosphatase; protein phosphatase 1B, magnesium dependent, beta isoform                                       |
| ppm1e      | protein phosphatase 1E (PP2C domain containing)                                                                                          |
| ppp1cc-ps1 | protein phosphatase 1, catalytic subunit, gamma isoform, pseudogene 1                                                                    |
| ppp1r9b    | protein phosphatase 1, regulatory subunit 9B                                                                                             |
| ppp2ca     | protein phosphatase 2 (formerly 2A), catalytic subunit, alpha isoform                                                                    |
| ppp2cb     | similar to protein phosphatase 2a, catalytic subunit, beta isoform; protein phosphatase 2 (formerly 2A), catalytic subunit, beta isoform |
| ppp2r1a    | protein phosphatase 2 (formerly 2A), regulatory subunit A (PR 65), alpha isoform                                                         |
| ppp2r1b    | protein phosphatase 2 (formerly 2A), regulatory subunit A (PR 65), beta isoform                                                          |
| ppp2r2a    | protein phosphatase 2 (formerly 2A), regulatory subunit B (PR 52), alpha isoform                                                         |
| ppp2r2c    | protein phosphatase 2 (formerly 2A), regulatory subunit B (PR 52), gamma isoform                                                         |
| ppp2r2d    | protein phosphatase 2, regulatory subunit B, delta isoform                                                                               |
| ppp2r3a    | protein phosphatase 2 (formerly 2A), regulatory subunit B", alpha; RIKEN cDNA 3222402P14 gene                                            |
| ppp2r4     | protein phosphatase 2A, regulatory subunit B (PR 53)                                                                                     |
| ppp2r5a    | similar to protein phosphatase 2, regulatory subunit B (B56), alpha isoform                                                              |
| ppp2r5b    | protein phosphatase 2, regulatory subunit B (B56), beta isoform                                                                          |
| ppp2r5c    | protein phosphatase 2, regulatory subunit B (B56), gamma isoform                                                                         |
| ppp2r5d    | protein phosphatase 2, regulatory subunit B (B56), delta isoform                                                                         |
| ppp2r5e    | protein phosphatase 2, regulatory subunit B (B56), epsilon isoform                                                                       |
| pramel1    | preferentially expressed antigen in melanoma-like 1                                                                                      |
| prickle3   | prickle homolog 3 (Drosophila)                                                                                                           |
| prim1      | DNA primase, p49 subunit                                                                                                                 |
| prim2      | DNA primase, p58 subunit                                                                                                                 |
| prkab2     | protein kinase, AMP-activated, beta 2 non-catalytic subunit                                                                              |
| prkacb     | protein kinase, cAMP dependent, catalytic, beta                                                                                          |
| prkag1     | protein kinase, AMP-activated, gamma 1 non-catalytic subunit                                                                             |
| prkag2     | protein kinase, AMP-activated, gamma 2 non-catalytic subunit                                                                             |
| prkag3     | protein kinase, AMP-activated, gamma 3 non-catalytic subunit                                                                             |
| prkar1b    | protein kinase, cAMP dependent regulatory, type I beta                                                                                   |
| prkcs      | protein kinase C substrate 80K-H                                                                                                         |
| prpf3      | PRP3 pre-mRNA processing factor 3 homolog (yeast)                                                                                        |
| prpf31     | PRP31 pre-mRNA processing factor 31 homolog (yeast)                                                                                      |

|           |                                                                                                                                                                                             |
|-----------|---------------------------------------------------------------------------------------------------------------------------------------------------------------------------------------------|
| prph2     | peripherin 2                                                                                                                                                                                |
| prpsap1   | phosphoribosyl pyrophosphate synthetase-associated protein 1                                                                                                                                |
| psat1     | similar to Phosphoserine aminotransferase 1; phosphoserine aminotransferase 1                                                                                                               |
| pscd1     | cytohesin 1                                                                                                                                                                                 |
| psma2     | proteasome (prosome, macropain) subunit, alpha type 2                                                                                                                                       |
| psma3     | proteasome (prosome, macropain) subunit, alpha type 3; predicted gene 5406                                                                                                                  |
| psma5     | proteasome (prosome, macropain) subunit, alpha type 5                                                                                                                                       |
| psma6     | proteasome (prosome, macropain) subunit, alpha type 6                                                                                                                                       |
| psma8     | proteasome (prosome, macropain) subunit, alpha type, 8                                                                                                                                      |
| psmb1     | proteasome (prosome, macropain) subunit, beta type 1                                                                                                                                        |
| psmb10    | proteasome (prosome, macropain) subunit, beta type 10                                                                                                                                       |
| psmb11    | proteasome (prosome, macropain) subunit, beta type, 11                                                                                                                                      |
| psmb2     | proteasome (prosome, macropain) subunit, beta type 2                                                                                                                                        |
| psmb3     | proteasome (prosome, macropain) subunit, beta type 3                                                                                                                                        |
| psmb4     | proteasome (prosome, macropain) subunit, beta type 4                                                                                                                                        |
| psmb5     | predicted gene 3375; proteasome (prosome, macropain) subunit, beta type 5                                                                                                                   |
| psmb6     | proteasome (prosome, macropain) subunit, beta type 6                                                                                                                                        |
| psmb7     | proteasome (prosome, macropain) subunit, beta type 7                                                                                                                                        |
| psmb7-ps1 | proteasome (prosome, macropain) subunit, beta type 7, pseudogene 1                                                                                                                          |
| psme1     | predicted gene 7776; proteasome (prosome, macropain) 28 subunit, alpha                                                                                                                      |
| psme1-ps1 | protease (prosome, macropain) 28 subunit, alpha, pseudogene 1                                                                                                                               |
| psme2     | protease (prosome, macropain) 28 subunit beta B, pseudogene; similar to Proteasome activator complex subunit 2 (Proteasome activator 28-beta subunit) (PA28beta) (PA28b)                    |
| psme2b-ps | protease (prosome, macropain) 28 subunit beta B, pseudogene; similar to Proteasome activator complex subunit 2 (Proteasome activator 28-beta subunit) (PA28beta) (PA28b)                    |
| psme2-ps1 | protease (prosome, macropain) 28 subunit, beta, b, pseudogene 1                                                                                                                             |
| psme2-ps2 | protease (prosome, macropain) 28 subunit, beta, b, pseudogene 2                                                                                                                             |
| psme3     | proteaseome (prosome, macropain) 28 subunit, 3                                                                                                                                              |
| psme4     | proteasome (prosome, macropain) activator subunit 4                                                                                                                                         |
| psmg1     | proteasome (prosome, macropain) assembly chaperone 1                                                                                                                                        |
| psmg2     | proteasome (prosome, macropain) assembly chaperone 2; similar to Clast3 protein                                                                                                             |
| psmg3     | proteasome (prosome, macropain) assembly chaperone 3                                                                                                                                        |
| ptafrr    | platelet-activating factor receptor                                                                                                                                                         |
| ptcra     | pre T-cell antigen receptor alpha                                                                                                                                                           |
| ptms      | parathyrosin                                                                                                                                                                                |
| ptprb     | protein tyrosine phosphatase, receptor type, B                                                                                                                                              |
| ptrh1     | peptidyl-tRNA hydrolase 1 homolog (S. cerevisiae)                                                                                                                                           |
| purb      | purine rich element binding protein B                                                                                                                                                       |
| qsm       | Qa1 structure modifier                                                                                                                                                                      |
| rabggtta  | Rab geranylgeranyl transferase, a subunit                                                                                                                                                   |
| rabggtb   | RAB geranylgeranyl transferase, b subunit                                                                                                                                                   |
| raet1a    | retinoic acid early transcript 1E; retinoic acid early transcript beta; retinoic acid early transcript 1, alpha; retinoic acid early transcript delta; retinoic acid early transcript gamma |
| raet1b    | retinoic acid early transcript 1E; retinoic acid early transcript beta; retinoic acid early transcript 1, alpha; retinoic acid early transcript delta; retinoic acid early transcript gamma |
| raet1c    | retinoic acid early transcript 1E; retinoic acid early transcript beta; retinoic acid early transcript 1, alpha; retinoic acid early transcript delta; retinoic acid early transcript gamma |
| raf1      | v-raf-leukemia viral oncogene 1                                                                                                                                                             |
| ranbp17   | RAN binding protein 17                                                                                                                                                                      |
| rars      | arginyl-tRNA synthetase                                                                                                                                                                     |
| rbp3      | retinol binding protein 3, interstitial                                                                                                                                                     |
| rcvrn     | recoverin                                                                                                                                                                                   |
| rd4       | retinal degeneration 4                                                                                                                                                                      |
| rdh11     | retinol dehydrogenase 11                                                                                                                                                                    |
| rdh12     | retinol dehydrogenase 12                                                                                                                                                                    |
| rdh13     | retinol dehydrogenase 13 (all-trans and 9-cis)                                                                                                                                              |
| rdh14     | retinol dehydrogenase 14 (all-trans and 9-cis)                                                                                                                                              |
| rdh5      | retinol dehydrogenase 5                                                                                                                                                                     |

|          |                                                                                                                                                                  |
|----------|------------------------------------------------------------------------------------------------------------------------------------------------------------------|
| rdh8     | retinol dehydrogenase 8                                                                                                                                          |
| reg2     | regenerating islet-derived 2                                                                                                                                     |
| reg3a    | regenerating islet-derived 3 alpha                                                                                                                               |
| reg3g    | regenerating islet-derived 3 gamma                                                                                                                               |
| rem1     | rad and gem related GTP binding protein 1                                                                                                                        |
| rem2     | rad and gem related GTP binding protein 2                                                                                                                        |
| rexo4    | REX4, RNA exonuclease 4 homolog (S. cerevisiae)                                                                                                                  |
| rgr      | retinal G protein coupled receptor                                                                                                                               |
| rgs11    | regulator of G-protein signaling 11; similar to regulator of G-protein signaling 11                                                                              |
| rgs7     | regulator of G protein signaling 7                                                                                                                               |
| rgs7bp   | regulator of G-protein signalling 7 binding protein                                                                                                              |
| rgs9     | regulator of G-protein signaling 9                                                                                                                               |
| rgs9bp   | regulator of G-protein signalling 9 binding protein                                                                                                              |
| rho      | rhodopsin                                                                                                                                                        |
| rims3    | regulating synaptic membrane exocytosis 3                                                                                                                        |
| ripr     | repression of phenobarbital-inducible P450                                                                                                                       |
| rlbp1    | retinaldehyde binding protein 1                                                                                                                                  |
| rmcs2    | histocompatibility 2, class II antigen A, beta 1; response to metastatic cancers 2; similar to H-2 class II histocompatibility antigen, A-D beta chain precursor |
| rmcs5    | response to metastatic cancers 5                                                                                                                                 |
| m7s6     | 7S RNA 6                                                                                                                                                         |
| mcr2     | myocardial infarction associated transcript (non-protein coding)                                                                                                 |
| mf181    | ring finger protein 181                                                                                                                                          |
| mf31     | ring finger protein 31                                                                                                                                           |
| mu1-ps1  | U1 small nuclear RNA pseudogene 1                                                                                                                                |
| rom1     | rod outer segment membrane protein 1                                                                                                                             |
| rorb     | hypothetical protein LOC100047843; RAR-related orphan receptor beta                                                                                              |
| rp1h     | retinitis pigmentosa 1 homolog (human)-like 1                                                                                                                    |
| rp11i    | retinitis pigmentosa 1 homolog (human)-like 1                                                                                                                    |
| rp2h     | retinitis pigmentosa 2 homolog (human)                                                                                                                           |
| rpain    | RPA interacting protein                                                                                                                                          |
| rpe65    | retinal pigment epithelium 65                                                                                                                                    |
| rpgr     | sushi-repeat-containing protein; retinitis pigmentosa GTPase regulator                                                                                           |
| rpgrip1  | retinitis pigmentosa GTPase regulator interacting protein 1                                                                                                      |
| rpl14    | predicted gene 9811; ribosomal protein L14                                                                                                                       |
| rpl23a   | ribosomal protein L23a                                                                                                                                           |
| rpl26    | ribosomal protein L26                                                                                                                                            |
| rpl27a   | ribosomal protein L27a                                                                                                                                           |
| rpl41    | ribosomal protein L41; predicted gene 3699                                                                                                                       |
| rpl5     | ribosomal protein L5                                                                                                                                             |
| rplag    | reduced platelet aggregation                                                                                                                                     |
| rplp2    | similar to LOC665931 protein; ribosomal protein, large P2; predicted gene 7852; WD repeat domain 89                                                              |
| rpo1-1   | polymerase (RNA) I polypeptide C                                                                                                                                 |
| rpo1-2   | polymerase (RNA) I polypeptide B                                                                                                                                 |
| rpo1-3   | RNA polymerase 1-3                                                                                                                                               |
| rpo1-4   | polymerase (RNA) I polypeptide A                                                                                                                                 |
| rps7     | similar to 40S ribosomal protein S7 (S8)                                                                                                                         |
| rrh      | retinal pigment epithelium derived rhodopsin homolog                                                                                                             |
| rrm2-ps1 | ribonucleotide reductase M2 pseudogene 1                                                                                                                         |
| rrt1     | retinoic acid regulated transcript 1                                                                                                                             |
| rrt1os   | retinoic acid regulated transcript 1 opposite strand transcription unit                                                                                          |
| rrt2     | retinoic acid regulated transcript 2                                                                                                                             |
| rrt3     | retinoic acid regulated transcript 3                                                                                                                             |
| rs1      | retinoschisis (X-linked, juvenile) 1 (human)                                                                                                                     |
| rtp1     | receptor transporter protein 1                                                                                                                                   |

|          |                                                                                                                                                                                                                                                    |
|----------|----------------------------------------------------------------------------------------------------------------------------------------------------------------------------------------------------------------------------------------------------|
| rxfp1    | relaxin/insulin-like family peptide receptor 1                                                                                                                                                                                                     |
| rxfp2    | relaxin/insulin-like family peptide receptor 2                                                                                                                                                                                                     |
| rxfp3    | relaxin family peptide receptor 3                                                                                                                                                                                                                  |
| rxfp4    | relaxin family peptide receptor 4                                                                                                                                                                                                                  |
| sag      | retinal S-antigen                                                                                                                                                                                                                                  |
| samd11   | sterile alpha motif domain containing 11                                                                                                                                                                                                           |
| sap30bp  | similar to transcriptional regulator protein; SAP30 binding protein                                                                                                                                                                                |
| sarm1    | sterile alpha and HEAT/Armadillo motif containing 1                                                                                                                                                                                                |
| sas2     | serum antigenic substance 2                                                                                                                                                                                                                        |
| scn1b    | sodium channel, voltage-gated, type I, beta                                                                                                                                                                                                        |
| scn2b    | sodium channel, voltage-gated, type II, beta                                                                                                                                                                                                       |
| scn3b    | sodium channel, voltage-gated, type III, beta                                                                                                                                                                                                      |
| scn4b    | sodium channel, type IV, beta                                                                                                                                                                                                                      |
| sctr     | secretin receptor; similar to Sctr protein                                                                                                                                                                                                         |
| sdf2l1   | stromal cell-derived factor 2-like 1                                                                                                                                                                                                               |
| sec1     | secretory blood group 1                                                                                                                                                                                                                            |
| sec61a1  | Sec61 alpha 1 subunit ( <i>S. cerevisiae</i> )                                                                                                                                                                                                     |
| sec61a2  | Sec61, alpha subunit 2 ( <i>S. cerevisiae</i> )                                                                                                                                                                                                    |
| sec61b   | Sec61 beta subunit; predicted gene 10320; predicted gene 5870; similar to protein translocation complex beta subunit predicted gene 11575; predicted gene 10177; predicted gene 4184; SEC61, gamma subunit; similar to Sec61-complex gamma-subunit |
| sec61g   | Sec61 gamma subunit                                                                                                                                                                                                                                |
| sgcz     | sarcoglycan zeta                                                                                                                                                                                                                                   |
| sh2d1a   | similar to T cell signal transduction molecule1 SAP; SH2 domain protein 1A                                                                                                                                                                         |
| sh2d1b1  | SH2 domain protein 1B1                                                                                                                                                                                                                             |
| sh2d1b2  | SH2 domain protein 1B2                                                                                                                                                                                                                             |
| slamf9   | SLAM family member 9                                                                                                                                                                                                                               |
| slc24a1  | solute carrier family 24 (sodium/potassium/calcium exchanger), member 1                                                                                                                                                                            |
| slc9a3r1 | solute carrier family 9 (sodium/hydrogen exchanger), member 3 regulator 1                                                                                                                                                                          |
| slc9a5   | solute carrier family 9 (sodium/hydrogen exchanger), member 5                                                                                                                                                                                      |
| smap1    | stromal membrane-associated protein 1                                                                                                                                                                                                              |
| smap2    | stromal membrane-associated GTPase-activating protein 2                                                                                                                                                                                            |
| snapc3   | small nuclear RNA activating complex, polypeptide 3                                                                                                                                                                                                |
| snrp2a   | U2 small nuclear ribonucleoprotein polypeptide 2A                                                                                                                                                                                                  |
| snta1    | syntrophin, acidic 1                                                                                                                                                                                                                               |
| sntb1    | syntrophin, basic 1                                                                                                                                                                                                                                |
| sntb2    | similar to beta-2-syntrophin; syntrophin, basic 2                                                                                                                                                                                                  |
| sntg1    | syntrophin, gamma 1                                                                                                                                                                                                                                |
| sntg2    | syntrophin, gamma 2                                                                                                                                                                                                                                |
| snupn    | snurportin 1                                                                                                                                                                                                                                       |
| snx22    | sorting nexin 22                                                                                                                                                                                                                                   |
| spata7   | spermatogenesis associated 7                                                                                                                                                                                                                       |
| spg21    | spastic paraplegia 21 homolog (human); similar to spastic paraplegia 21 homolog                                                                                                                                                                    |
| spi5l    | serine protease inhibitor 5-like                                                                                                                                                                                                                   |
| spnb1    | spectrin beta 1                                                                                                                                                                                                                                    |
| spnb2    | spectrin beta 2                                                                                                                                                                                                                                    |
| spnb5    | spectrin beta 5                                                                                                                                                                                                                                    |
| srp14    | signal recognition particle 14                                                                                                                                                                                                                     |
| srp19    | signal recognition particle 19                                                                                                                                                                                                                     |
| srp54a   | signal recognition particle 54b; signal recognition particle 54a; signal recognition particle 54C                                                                                                                                                  |
| srp54b   | signal recognition particle 54b; signal recognition particle 54a; signal recognition particle 54C                                                                                                                                                  |
| srp9     | signal recognition particle 9                                                                                                                                                                                                                      |
| srpr     | signal recognition particle receptor ('docking protein')                                                                                                                                                                                           |
| srprb    | signal recognition particle receptor, B subunit                                                                                                                                                                                                    |
| ssr1     | signal sequence receptor, alpha; similar to signal sequence receptor, alpha                                                                                                                                                                        |
| ssr2     | signal sequence receptor, beta                                                                                                                                                                                                                     |

|            |                                                                                                             |
|------------|-------------------------------------------------------------------------------------------------------------|
| ssr3       | signal sequence receptor, gamma                                                                             |
| ssr4       | signal sequence receptor, delta                                                                             |
| st3gal1    | ST3 beta-galactoside alpha-2,3-sialyltransferase 1                                                          |
| st3gal2    | ST3 beta-galactoside alpha-2,3-sialyltransferase 2                                                          |
| st3gal3    | ST3 beta-galactoside alpha-2,3-sialyltransferase 3                                                          |
| st3gal4    | ST3 beta-galactoside alpha-2,3-sialyltransferase 4                                                          |
| st6gal1    | beta galactoside alpha 2,6 sialyltransferase 1                                                              |
| st6galnac4 | ST6 (alpha-N-acetyl-neuraminy-2,3-beta-galactosyl-1,3)-N-acetylglactosaminide alpha-2,6-sialyltransferase 4 |
| st8sia1    | ST8 alpha-N-acetyl-neuraminide alpha-2,8-sialyltransferase 1                                                |
| st8sia3    | ST8 alpha-N-acetyl-neuraminide alpha-2,8-sialyltransferase 3                                                |
| stambpl1   | STAM binding protein like 1                                                                                 |
| ston1      | stonin 1                                                                                                    |
| ston2      | stonin 2                                                                                                    |
| sucla2     | succinate-Coenzyme A ligase, ADP-forming, beta subunit                                                      |
| suclg1     | succinate-CoA ligase, GDP-forming, alpha subunit                                                            |
| suclg2     | succinate-Coenzyme A ligase, GDP-forming, beta subunit                                                      |
| svs3a      | seminal vesicle secretion 3A                                                                                |
| svs3b      | seminal vesicle secretory protein 3B                                                                        |
| t(2;4)1go  | reciprocal translocation, Chr 2 and 4, Gottingen 1                                                          |
| tbca       | tubulin cofactor A; predicted gene 4374; predicted gene 6142; similar to cofactor A                         |
| tbcc       | tubulin-specific chaperone C                                                                                |
| tbcd       | tubulin-specific chaperone d                                                                                |
| tblv1      | thymotropic type B leukemogenic virus integration                                                           |
| tbxa2r     | thromboxane A2 receptor                                                                                     |
| tceb1l-rs2 | transcription elongation factor B (SIII), polypeptide 1-like, related sequence 2                            |
| tcfap2b    | transcription factor AP-2 beta                                                                              |
| tcfap2d    | transcription factor AP-2, delta                                                                            |
| tcfap2e    | transcription factor AP-2, epsilon                                                                          |
| tcra-c     | T-cell receptor alpha, constant region                                                                      |
| tcra-v     | T-cell receptor alpha, variable region                                                                      |
| tcra-v1    | T-cell receptor alpha, variable 1                                                                           |
| tcra-v11.1 | T-cell receptor alpha, variable 11.1                                                                        |
| tcra-v11.2 | T-cell receptor alpha, variable 11.2                                                                        |
| tcra-v11.3 | T-cell receptor alpha, variable 11.3                                                                        |
| tcra-v11.8 | T-cell receptor alpha, variable 11.8                                                                        |
| tcra-v13   | T-cell receptor alpha, variable 13                                                                          |
| tcra-v13.1 | T-cell receptor alpha variable region family 13 subfamily 1                                                 |
| tcra-v13.2 | T-cell receptor alpha variable region family 13 subfamily 2                                                 |
| tcra-v13.3 | T-cell receptor alpha variable region family 13 subfamily 3                                                 |
| tcra-v13.4 | T-cell receptor alpha variable region family 13 subfamily 4                                                 |
| tcra-v13.5 | T-cell receptor alpha variable region family 13 subfamily 5                                                 |
| tcra-v14   | T-cell receptor alpha, variable 14                                                                          |
| tcra-v15   | T-cell receptor alpha, variable 15                                                                          |
| tcra-v16.1 | T-cell receptor, alpha, variable 16.1                                                                       |
| tcra-v19.1 | T-cell receptor alpha, variable 19.1                                                                        |
| tcra-v2    | T-cell receptor alpha, variable 2                                                                           |
| tcra-v2.4  | T-cell receptor alpha, variable 2.4                                                                         |
| tcra-v2.5  | T-cell receptor alpha, variable 2.5                                                                         |
| tcra-v2.6  | T-cell receptor alpha, variable 2.6                                                                         |
| tcra-v23.1 | T-cell receptor alpha, variable 23.1                                                                        |
| tcra-v3    | T-cell receptor alpha, variable 3                                                                           |
| tcra-v3.1  | T-cell receptor alpha, variable 3.1                                                                         |
| tcra-v4    | T-cell receptor alpha, variable 4                                                                           |
| tcra-v5    | T-cell receptor alpha, variable 5                                                                           |
| tcra-v6    | T-cell receptor alpha, variable 6                                                                           |

|           |                                                                                                          |
|-----------|----------------------------------------------------------------------------------------------------------|
| tcra-v7   | T-cell receptor alpha, variable 7                                                                        |
| tcra-v9   | T-cell receptor alpha, variable 9                                                                        |
| tcra-va10 | T-cell receptor alpha, variable A10                                                                      |
| tcrb-c    | T-cell receptor beta, constant region                                                                    |
| tcrb-d    | T-cell receptor beta, D region                                                                           |
| tcrbe     | T-cell receptor beta chain enhancer                                                                      |
| tcrb-j    | T-cell receptor beta, joining region                                                                     |
| tcrb-v    | T-cell receptor beta, variable region                                                                    |
| tcrb-v1   | T-cell receptor beta, variable 1                                                                         |
| tcrb-v10  | T-cell receptor beta, variable 10                                                                        |
| tcrb-v11  | T-cell receptor beta, variable 11                                                                        |
| tcrb-v12  | T-cell receptor beta, variable 12                                                                        |
| tcrb-v13  | T-cell receptor beta, variable 13                                                                        |
| tcrb-v14  | T-cell receptor beta, variable 14                                                                        |
| tcrb-v15  | T-cell receptor beta, variable 15                                                                        |
| tcrb-v16  | T-cell receptor beta, variable 16                                                                        |
| tcrb-v17  | T-cell receptor beta, variable 17                                                                        |
| tcrb-v19  | T-cell receptor beta, variable 19                                                                        |
| tcrb-v2   | T-cell receptor beta, variable 2                                                                         |
| tcrb-v20  | protease, serine, 3; predicted gene 10334; T-cell receptor beta, variable V20; similar to trypsinogen 15 |
| tcrb-v3   | T-cell receptor beta, variable 3                                                                         |
| tcrb-v3.1 | T-cell receptor beta, variable 3.1                                                                       |
| tcrb-v3.2 | T-cell receptor beta, variable 3.2                                                                       |
| tcrb-v4   | T-cell receptor beta, variable 4                                                                         |
| tcrb-v5   | T-cell receptor beta, variable 5                                                                         |
| tcrb-v5.1 | T-cell receptor beta, variable 5.1                                                                       |
| tcrb-v5.2 | T-cell receptor beta, variable 5.2                                                                       |
| tcrb-v6   | T-cell receptor beta, variable 6                                                                         |
| tcrb-v7   | T-cell receptor beta, variable 7                                                                         |
| tcrb-v8   | T-cell receptor beta, variable 8                                                                         |
| tcrb-v8.2 | T-cell receptor beta, variable 8.2                                                                       |
| tcrb-v9   | T-cell receptor beta, variable 9                                                                         |
| tcrd-c    | T-cell receptor delta, constant region                                                                   |
| tcrd-d    | T-cell receptor delta, D region                                                                          |
| tcrd-j    | T-cell receptor delta, joining region                                                                    |
| tcrd-v1   | T-cell receptor delta, variable 1                                                                        |
| tcrd-v2   | T-cell receptor delta, variable 2                                                                        |
| tcrd-v3   | T-cell receptor delta, variable 3                                                                        |
| tcrd-v4   | T-cell receptor delta, variable 4                                                                        |
| tcrd-v5   | T-cell receptor delta, variable 5                                                                        |
| tcrd-v5t  | T-cell receptor delta, variable 5T                                                                       |
| tcrd-v6   | T-cell receptor delta, variable 6                                                                        |
| tcrd-v7   | T-cell receptor delta, variable 7                                                                        |
| tcrg      | T-cell receptor gamma, variable 2; T-cell receptor gamma chain                                           |
| tcrg-c    | T-cell receptor gamma, constant region                                                                   |
| tcrg-c1   | T-cell receptor gamma, constant 1                                                                        |
| tcrg-c2   | T-cell receptor gamma, constant 2                                                                        |
| tcrg-c4   | T-cell receptor gamma, constant 4                                                                        |
| tcrg-j    | T-cell receptor gamma, joining region                                                                    |
| tcrg-v    | T-cell receptor gamma, variable region                                                                   |
| tcrg-v1   | T-cell receptor gamma, variable 1                                                                        |
| tcrg-v2   | T-cell receptor gamma, variable 2; T-cell receptor gamma chain                                           |
| tcrg-v3   | T-cell receptor gamma, variable 3                                                                        |
| tcrg-v4   | T-cell receptor gamma, variable 4                                                                        |
| tcrg-v5   | T-cell receptor gamma, variable 5                                                                        |



|                  |                                                                                                                |
|------------------|----------------------------------------------------------------------------------------------------------------|
| tcr-g-v6         | T-cell receptor gamma, variable 6                                                                              |
| tg(il1a)1.1tsk   | Transgene insertion 1.1, Thomas Kupper                                                                         |
| tg(itga5)0844fmw | transgene insertion 0858, Fiona M Watt                                                                         |
| tg(itgb1)0840fmw | transgene insertion 0840, Fiona M Watt                                                                         |
| tg(tgfb1)1der    | transgene insertion 1, Dennis R Roop                                                                           |
| tgfb1i2          | transforming growth factor beta 1 induced transcript 2                                                         |
| tgfb1i3          | transforming growth factor beta 1 induced transcript 3                                                         |
| tgfbr3           | transforming growth factor, beta receptor III                                                                  |
| tgtp             | T-cell specific GTPase 1                                                                                       |
| thrap3           | thyroid hormone receptor associated protein 3; predicted gene 5898                                             |
| tk               | tail-kinks                                                                                                     |
| tln1             | talin 1                                                                                                        |
| tln2             | talin 2                                                                                                        |
| tlsr4            | thymic lymphoma suppressor region 4                                                                            |
| tlsr5            | thymic lymphoma suppressor region 5                                                                            |
| tm2d1            | TM2 domain containing 1                                                                                        |
| tm2d2            | TM2 domain containing 2                                                                                        |
| tmed9            | transmembrane emp24 protein transport domain containing 9                                                      |
| tmem11           | transmembrane protein 11                                                                                       |
| tmem181          | transmembrane protein 181                                                                                      |
| tmem185b         | transmembrane protein 185B                                                                                     |
| tmem37           | transmembrane protein 37                                                                                       |
| tmem66           | transmembrane protein 66                                                                                       |
| tmevp1           | heiler's murine encephalomyelitis virus persistence 1                                                          |
| tmsb10           | predicted gene 3787; predicted gene 9844; predicted gene 8034; similar to thymosin, beta 10; thymosin, beta 10 |
| tnpo1            | predicted gene 6493; transportin 1                                                                             |
| top2b            | topoisomerase (DNA) II beta                                                                                    |
| tpml             | tropomyosin-like                                                                                               |
| tram1            | translocating chain-associating membrane protein 1                                                             |
| trappc6b         | trafficking protein particle complex 6B                                                                        |
| trappc9          | trafficking protein particle complex 9                                                                         |
| trav12n-1        | T cell receptor alpha variable 12d-1;                                                                          |
| trav16d/dv11     | T cell receptor alpha variable 16D-DV11                                                                        |
| trav7d-3         | T cell receptor alpha chain V region 7D-3; similar to T cell receptor alpha                                    |
| trbd1            | T cell receptor beta diversity 1                                                                               |
| trbd2            | T cell receptor beta diversity 2                                                                               |
| trdd1            | T cell receptor delta diversity 1                                                                              |
| trdd2            | T cell receptor delta diversity 2                                                                              |
| trdj2            | T cell receptor delta joining 2                                                                                |
| treh             | trehalase (brush-border membrane glycoprotein)                                                                 |
| trgj4            | T cell receptor gamma joining 4                                                                                |
| trhr             | thyrotropin releasing hormone receptor                                                                         |
| try5             | trypsin 5                                                                                                      |
| tse2             | tissue specific extinction 2, of L-ADH                                                                         |
| tshb             | thyroid stimulating hormone, beta subunit                                                                      |
| tshr             | thyroid stimulating hormone receptor                                                                           |
| tspan4           | tetraspanin 4                                                                                                  |
| tsri             | T-cell subset ratio influence                                                                                  |
| ttyh3            | tweety homolog 3 (Drosophila)                                                                                  |
| tuba-rs1         | tubulin alpha, related sequence 1                                                                              |
| tubb2c           | tubulin, beta 2c, pseudogene 1; tubulin, beta 2C; tubulin, beta 2c, pseudogene 2                               |
| tug1             | taurine upregulated gene 1                                                                                     |
| tulp1            | tubby like protein 1                                                                                           |
| tulp2            | tubby-like protein 2                                                                                           |
| tulp3            | tubby-like protein 3                                                                                           |

|            |                                                                                                                                         |
|------------|-----------------------------------------------------------------------------------------------------------------------------------------|
| ubb        | ubiquitin B                                                                                                                             |
| ubb3       | ubiquitin 3                                                                                                                             |
| ubc        | ubiquitin C                                                                                                                             |
| ube1y1-ps2 | ubiquitin-activating enzyme E1, Chr Y-1, pseudogene 2                                                                                   |
| ubqln2     | ubiquilin 2                                                                                                                             |
| umpk-ps    | uridine monophosphate kinase, pseudogene                                                                                                |
| unc119     | unc-119 homolog (C. elegans)                                                                                                            |
| uqcrb      | predicted gene 2962; ubiquinol-cytochrome c reductase binding protein                                                                   |
| usp20      | ubiquitin specific peptidase 20                                                                                                         |
| usp3       | ubiquitin specific peptidase 3                                                                                                          |
| usp33      | ubiquitin specific peptidase 33                                                                                                         |
| usp38      | ubiquitin specific peptidase 38                                                                                                         |
| utp14b     | UTP14, U3 small nucleolar ribonucleoprotein, homolog B (yeast)                                                                          |
| v1rh13     | vomeronasal 1 receptor 219                                                                                                              |
| vars       | valyl-tRNA synthetase                                                                                                                   |
| vhll       | von Hippel-Lindau tumor suppressor-like, pseudogene 1                                                                                   |
| vit        | vitrin                                                                                                                                  |
| vsx1       | visual system homeobox 1 homolog (zebrafish)                                                                                            |
| vsx2       | visual system homeobox 2                                                                                                                |
| wdr17      | WD repeat domain 17                                                                                                                     |
| wdr61      | WD repeat domain 61                                                                                                                     |
| wdr7       | WD repeat domain 7                                                                                                                      |
| wwp2       | WW domain containing E3 ubiquitin protein ligase 2                                                                                      |
| x76971     | T cell receptor alpha variable 14N-3; cDNA sequence X76971; predicted gene, OTTMUSG00000015124                                          |
| xcr1       | chemokine (C motif) receptor 1                                                                                                          |
| xmv12      | xenotropic murine leukemia virus 12                                                                                                     |
| xmv24      | xenotropic murine leukemia virus 24                                                                                                     |
| xmv26      | xenotropic murine leukemia virus 26                                                                                                     |
| xmv28      | xenotropic murine leukemia virus 28                                                                                                     |
| xmv33      | xenotropic murine leukemia virus 33                                                                                                     |
| xmv65      | xenotropic murine leukemia virus 65                                                                                                     |
| xmv66      | xenotropic murine leukemia virus 66                                                                                                     |
| xpo4       | exportin 4                                                                                                                              |
| yes1       | Yamaguchi sarcoma viral (v-yes) oncogene homolog 1                                                                                      |
| zbed4      | predicted gene 8007; hypothetical protein LOC100045355; predicted gene 3711; zinc finger, BED domain containing 4; predicted gene 15583 |
| zbtb43     | zinc finger and BTB domain containing 43                                                                                                |
| zdhhc21    | zinc finger, DHHC domain containing 21                                                                                                  |
| zdhhc3     | zinc finger, DHHC domain containing 3                                                                                                   |
| zdhhc7     | zinc finger, DHHC domain containing 7                                                                                                   |
| zfp148-ps1 | zinc finger protein 148, pseudogene 1                                                                                                   |
| zfp414     | zinc finger protein 414                                                                                                                 |
| zfyve9     | zinc finger, FYVE domain containing 9                                                                                                   |
| zswim6     | zinc finger, SWIM domain containing 6                                                                                                   |

**Table S17. G protein theoretical dataset.** Latent semantic indexing generated list of implicitly-associated genes linked to arrest-related input terminology. For each gene the Gene Symbol and textual definition is denoted below.

| Gene Symbol    | Definition                                                                       |
|----------------|----------------------------------------------------------------------------------|
| 621968         | T-cell receptor beta, variable 1                                                 |
| 100039796      | T-cell specific GTPase 2                                                         |
| 0610007p14rik  | RIKEN cDNA 0610007P14 gene                                                       |
| 0610031j06rik  | RIKEN cDNA 0610031J06 gene                                                       |
| 0610037d15rik  | coiled-coil domain containing 163                                                |
| 0610038d11rik  | tRNA methyltransferase 11-2 homolog (S. cerevisiae)                              |
| 1100001e04rik  | Rho GTPase activating protein 36                                                 |
| 1110001d15rik  | collagen, type VI, alpha 4                                                       |
| 1110004f10rik  | predicted gene 9169; RIKEN cDNA 1110004F10 gene; similar to small acidic protein |
| 1110004o12rik  | ankyrin repeat and KH domain containing 1                                        |
| 1110005a03rik  | RIKEN cDNA 1110005A03 gene                                                       |
| 1110007115rik  | predicted gene 14127; RIKEN cDNA 1110005A03 gene                                 |
| 1110017d15rik  | RIKEN cDNA 1110017D15 gene                                                       |
| 1110020p15rik  | ubiquinol-cytochrome c reductase, complex III subunit X                          |
| 1110028a07rik  | fat storage-inducing transmembrane protein 1                                     |
| 1200014j11rik  | similar to RIKEN cDNA 1200014J11 gene; RIKEN cDNA 1200014J11 gene                |
| 1500005a01rik  | family with sequence similarity 158, member A                                    |
| 1500010j02rik  | RIKEN cDNA 1500010J02 gene                                                       |
| 1600002k03rik  | RIKEN cDNA 1600002K03 gene                                                       |
| 1700006a11rik  | RIKEN cDNA 1700006A11 gene                                                       |
| 1700007e06rik  | RIKEN cDNA 1700007E06 gene                                                       |
| 1700008g05rik  | fatty acid binding protein 12                                                    |
| 1700009n14rik  | RIKEN cDNA 1700009N14 gene                                                       |
| 1700011f03rik  | RIKEN cDNA 1700011F03 gene                                                       |
| 1700016k13rik  | septin 14                                                                        |
| 1700016m24rik  | RIKEN cDNA 1700016M24 gene                                                       |
| 1700019h03rik  | solute carrier family 17, member 9                                               |
| 1700021p22rik  | family with sequence similarity 71, member E1                                    |
| 1700047i17rik1 | RIKEN cDNA 1700047I17 gene 2; RIKEN cDNA 1700047I17 gene 1                       |
| 1700047i15rik  | SPANX family, member N4                                                          |
| 1700054f22rik  | nipsnap homolog 3A (C. elegans)                                                  |
| 1700055m20rik  | testis, prostate and placenta expressed                                          |
| 1700057k13rik  | RIKEN cDNA 1700057K13 gene                                                       |
| 1700126i10rik  | RIKEN cDNA 1810014F10 gene                                                       |
| 1810007m14rik  | GC-rich sequence DNA-binding factor 1                                            |
| 1810014f10rik  | RIKEN cDNA 1810014F10 gene                                                       |
| 1810023f06rik  | interferon, alpha-inducible protein 27 like 2B                                   |
| 1810048j11rik  | RIKEN cDNA 1810048J11 gene                                                       |
| 1810055g02rik  | RIKEN cDNA 1810055G02 gene                                                       |
| 2010002n04rik  | RIKEN cDNA 2010002N04 gene                                                       |
| 2300002d11rik  | TMF1-regulated nuclear protein 1                                                 |
| 2310001a20rik  | RIKEN cDNA 2310001A20 gene                                                       |
| 2310002b06rik  | coiled-coil domain containing 75                                                 |
| 2310003c23rik  | predicted gene 5206; RIKEN cDNA 2310003C23 gene                                  |
| 2310033p09rik  | RIKEN cDNA 2310033P09 gene                                                       |
| 2310047d13rik  | family with sequence similarity 57, member A                                     |
| 2310079n02rik  | RIKEN cDNA 2310079N02 gene                                                       |

|               |                                                                         |
|---------------|-------------------------------------------------------------------------|
| 2410015n17rik | dCTP pyrophosphatase 1                                                  |
| 2410018c20rik | methylthioribose-1-phosphate isomerase homolog ( <i>S. cerevisiae</i> ) |
| 2410018m08rik | RIKEN cDNA 2410018M08 gene                                              |
| 2500003m10rik | predicted gene 6365; RIKEN cDNA 2500003M10 gene                         |
| 2610024e20rik | family with sequence similarity 13, member B                            |
| 2610036l11rik | RIKEN cDNA 2610036L11 gene                                              |
| 2700078k21rik | RIKEN cDNA 2700078K21 gene                                              |
| 2810012g03rik | family with sequence similarity 53, member C                            |
| 3110043j09rik | Rho GTPase activating protein 8                                         |
| 3222402p14rik | protein phosphatase 2, regulatory subunit B", alpha                     |
| 3300001g02rik | small nuclear ribonucleoprotein 25 (U11/U12)                            |
| 4121402d02rik | male-specific lethal 1 homolog ( <i>Drosophila</i> )                    |
| 4432412l15rik | RIKEN cDNA 4432412L15 gene                                              |
| 4631416l12rik | RIKEN cDNA 4631416L12 gene                                              |
| 4632419k20rik | family with sequence similarity 160, member A2                          |
| 4733401h18rik | NADH dehydrogenase (ubiquinone) 1 alpha subcomplex, assembly factor 3   |
| 4833424o15rik | RIKEN cDNA 4833424O15 gene                                              |
| 4921509e07rik | family with sequence similarity 71, member D                            |
| 4921537p18rik | POTE ankyrin domain family, member G                                    |
| 4922501c03rik | RIKEN cDNA 4922501C03 gene                                              |
| 4930420k17rik | RIKEN cDNA 4930420K17 gene                                              |
| 4930432k09rik | RIKEN cDNA 4930432K09 gene                                              |
| 4930455c21rik | RIKEN cDNA 4930455C21 gene                                              |
| 4930467e23rik | RIKEN cDNA 4930467E23 gene                                              |
| 4930481f22rik | synaptonemal complex central element protein 1 like                     |
| 4930527e24rik | Slx-like 1                                                              |
| 4930579c15rik | RIKEN cDNA 4930579C15 gene                                              |
| 4931433a01rik | ATP/GTP binding protein-like 4                                          |
| 4932425i24rik | RIKEN cDNA 4932425I24 gene                                              |
| 4932432k03rik | MU-2/AP1M2 domain containing, death-inducing                            |
| 4932438h23rik | RIKEN cDNA 4932438H23 gene                                              |
| 4932442k08rik | family with sequence similarity 120, member B                           |
| 4933406e20rik | prolyl 4-hydroxylase, transmembrane (endoplasmic reticulum)             |
| 4933411k20rik | RIKEN cDNA 4933411K20 gene                                              |
| 4933417m04rik | family with sequence similarity 71, member A                            |
| 4933424b01rik | RIKEN cDNA 4933424B01 gene                                              |
| 4933428g20rik | hypothetical LOC100141474                                               |
| 4933436h12rik | RIKEN cDNA 4933436H12 gene                                              |
| 5133400g04rik | spermatogenesis associated 24                                           |
| 5730427n09rik | NSA2 ribosome biogenesis homolog ( <i>S. cerevisiae</i> )               |
| 5730449l18rik | RIKEN cDNA 6430548M08 gene                                              |
| 5730596k20rik | RIKEN cDNA 9430023L20 gene                                              |
| 5830417i10rik | RIKEN cDNA 5830417I10 gene                                              |
| 6330569m22rik | family with sequence similarity 40, member A                            |
| 6430548m08rik | RIKEN cDNA 6430548M08 gene                                              |
| 6720467c03rik | family with sequence similarity 92, member A                            |
| 8430415e04rik | protein phosphatase 4, regulatory subunit 4                             |
| 9130227c08rik | KH and NYN domain containing                                            |
| 9430023l20rik | RIKEN cDNA 9430023L20 gene                                              |
| 9930111j21rik | RIKEN cDNA 9930111J21 gene 1                                            |
| a130040m12rik | RIKEN cDNA A130040M12 gene                                              |
| a130090k04rik | interaction protein for cytohesin exchange factors 1                    |
| a230067g21rik | Ral GTPase activating protein, alpha subunit 2 (catalytic)              |
| a230083h22rik | prune homolog 2 ( <i>Drosophila</i> )                                   |
| a430041b07rik | family with sequence similarity 179, member B                           |

|               |                                                                                                                                    |
|---------------|------------------------------------------------------------------------------------------------------------------------------------|
| a430107p09rik | similar to T-cell receptor alpha chain V region CTL-L17 precursor; RIKEN cDNA A430107P09 gene; T cell receptor alpha variable 6N-6 |
| a430110n23rik | RIKEN cDNA A430110N23 gene                                                                                                         |
| a630007b06rik | RIKEN cDNA A630007B06 gene                                                                                                         |
| a630038e17rik | RIKEN cDNA A630038E17 gene; RIKEN cDNA A630098A13 gene                                                                             |
| a630095e13rik | RIKEN cDNA A630095E13 gene                                                                                                         |
| a630098a13rik | RIKEN cDNA A630038E17 gene; RIKEN cDNA A630098A13 gene                                                                             |
| a730076h11rik | RIKEN cDNA A730076H11 gene                                                                                                         |
| abca14        | ATP-binding cassette, sub-family A (ABC1), member 14                                                                               |
| abca15        | ATP-binding cassette, sub-family A (ABC1), member 15                                                                               |
| abca16        | ATP-binding cassette, sub-family A (ABC1), member 16                                                                               |
| abcb10        | ATP-binding cassette, sub-family B (MDR/TAP), member 10; similar to ABC transporter                                                |
| abcb6         | ATP-binding cassette, sub-family B (MDR/TAP), member 6                                                                             |
| abcb8         | ATP-binding cassette, sub-family B (MDR/TAP), member 8                                                                             |
| abcb9         | ATP-binding cassette, sub-family B (MDR/TAP), member 9                                                                             |
| abcf1         | ATP-binding cassette, sub-family F (GCN20), member 1                                                                               |
| abhd1         | abhydrolase domain containing 1                                                                                                    |
| abhd14b       | abhydrolase domain containing 14b                                                                                                  |
| abhd2         | abhydrolase domain containing 2                                                                                                    |
| abhd3         | abhydrolase domain containing 3                                                                                                    |
| abhd6         | predicted gene 1833; abhydrolase domain containing 6                                                                               |
| ablim2        | actin-binding LIM protein 2                                                                                                        |
| abpa          | androgen binding protein alpha; hypothetical protein LOC100044256                                                                  |
| abpb          | androgen binding protein beta                                                                                                      |
| abpd          | predicted gene 6725; androgen binding protein delta; predicted gene 4684                                                           |
| abpe          | androgen binding protein epsilon                                                                                                   |
| abpg          | androgen binding protein gamma                                                                                                     |
| abpz          | androgen binding protein zeta                                                                                                      |
| abr           | active BCR-related gene                                                                                                            |
| accn5         | amiloride-sensitive cation channel 5, intestinal                                                                                   |
| actl6b        | actin-like 6B                                                                                                                      |
| actr8         | ARP8 actin-related protein 8 homolog ( <i>S. cerevisiae</i> )                                                                      |
| adam19        | a disintegrin and metallopeptidase domain 19 (meltrin beta); similar to metalloprotease-disintegrin meltrin beta                   |
| adam1a        | a disintegrin and metallopeptidase domain 1a                                                                                       |
| adam1b        | similar to a disintegrin and metalloproteinase domain 1b; a disintegrin and metallopeptidase domain 1b                             |
| adam2         | a disintegrin and metallopeptidase domain 2                                                                                        |
| adam23        | a disintegrin and metallopeptidase domain 23; similar to ADAM23                                                                    |
| adam28        | a disintegrin and metallopeptidase domain 28                                                                                       |
| adam3         | a disintegrin and metallopeptidase domain 3 (cyritestin)                                                                           |
| adam32        | a disintegrin and metallopeptidase domain 32                                                                                       |
| adam4         | predicted gene 5746; a disintegrin and metallopeptidase domain 4                                                                   |
| adam5         | a disintegrin and metallopeptidase domain 5                                                                                        |
| adcy2         | adenylate cyclase 2                                                                                                                |
| adcy4         | adenylate cyclase 4                                                                                                                |
| adcy5         | adenylate cyclase 5; similar to adenylate cyclase 5                                                                                |
| add3          | adducin 3 (gamma)                                                                                                                  |
| adnp2         | ADNP homeobox 2                                                                                                                    |
| adra1a        | adrenergic receptor, alpha 1a                                                                                                      |
| adra1b        | adrenergic receptor, alpha 1b                                                                                                      |
| adra1d        | adrenergic receptor, alpha 1d                                                                                                      |
| ads4          | anti dsDNA antibody 4                                                                                                              |
| agbl5         | ATP/GTP binding protein-like 5                                                                                                     |
| ai314180      | expressed sequence AI314180                                                                                                        |
| ai324046      | expressed sequence AI324046                                                                                                        |

|          |                                                                                                                                                                |
|----------|----------------------------------------------------------------------------------------------------------------------------------------------------------------|
| ai507611 | family with sequence similarity 71, member F2                                                                                                                  |
| ai607873 | expressed sequence AI607873                                                                                                                                    |
| ai662250 | vimentin-type intermediate filament associated coiled-coil protein                                                                                             |
| aig1     | androgen-induced 1                                                                                                                                             |
| aim1l    | absent in melanoma 1-like                                                                                                                                      |
| ak3l1    | predicted gene 13639; similar to adenylate kinase 4; adenylate kinase 3-like 1                                                                                 |
| ak5      | adenylate kinase 5                                                                                                                                             |
| akap13   | A kinase (PRKA) anchor protein 13                                                                                                                              |
| akr1c19  | aldo-keto reductase family 1, member C19                                                                                                                       |
| akr1e1   | aldo-keto reductase family 1, member E1                                                                                                                        |
| aldr5    | aldehyde reductase 5                                                                                                                                           |
| alph1    | alphaprotein 1                                                                                                                                                 |
| alph2    | alphaprotein 2                                                                                                                                                 |
| als2     | amyotrophic lateral sclerosis 2 (juvenile) homolog (human)                                                                                                     |
| als2cl   | ALS2 C-terminal like                                                                                                                                           |
| als2cr2  | amyotrophic lateral sclerosis 2 (juvenile) chromosome region, candidate 2 homolog (human)                                                                      |
| ambp     | alpha 1 microglobulin/bikunin                                                                                                                                  |
| amd      | autoimmune myocardial disease                                                                                                                                  |
| amotl2   | angiomin-like 2                                                                                                                                                |
| ankar    | ankyrin and armadillo repeat containing                                                                                                                        |
| ankfy1   | ankyrin repeat and FYVE domain containing 1                                                                                                                    |
| ankhd1   | ankyrin repeat and KH domain containing 1; eukaryotic translation initiation factor 4E binding protein 3                                                       |
| ankrd27  | ankyrin repeat domain 27 (VPS9 domain)                                                                                                                         |
| ankrd35  | ankyrin repeat domain 35                                                                                                                                       |
| ankrd42  | ankyrin repeat domain 42                                                                                                                                       |
| ankrd44  | ankyrin repeat domain 44                                                                                                                                       |
| ankrd49  | ankyrin repeat domain 49                                                                                                                                       |
| ankrd52  | ankyrin repeat domain 52                                                                                                                                       |
| ankrd7   | ankyrin repeat domain 7                                                                                                                                        |
| ap1b1    | adaptor protein complex AP-1, beta 1 subunit                                                                                                                   |
| ap1g1    | adaptor protein complex AP-1, gamma 1 subunit                                                                                                                  |
| ap1m1    | adaptor-related protein complex AP-1, mu subunit 1                                                                                                             |
| ap1s1    | adaptor protein complex AP-1, sigma 1                                                                                                                          |
| ap2b1    | adaptor-related protein complex 2, beta 1 subunit                                                                                                              |
| ap2m1    | predicted gene 8717; adaptor protein complex AP-2, mu1                                                                                                         |
| ap2s1    | adaptor-related protein complex 2, sigma 1 subunit                                                                                                             |
| ap3m1    | adaptor-related protein complex 3, mu 1 subunit; similar to Adapter-related protein complex 3 mu 1 subunit (Mu-adaptin 3A) (AP-3 adapter complex mu3A subunit) |
| ap3s1    | predicted gene 7603; adaptor-related protein complex 3, sigma 1 subunit; predicted gene 5610                                                                   |
| ap3s2    | adaptor-related protein complex 3, sigma 2 subunit                                                                                                             |
| ap4b1    | adaptor-related protein complex AP-4, beta 1                                                                                                                   |
| ap4e1    | adaptor-related protein complex AP-4, epsilon 1                                                                                                                |
| ap4m1    | adaptor-related protein complex AP-4, mu 1                                                                                                                     |
| ap4s1    | adaptor-related protein complex AP-4, sigma 1                                                                                                                  |
| apbh     | androgen-binding protein eta                                                                                                                                   |
| arcn1    | similar to Archain 1; archain 1; similar to coat protein delta-cop; predicted gene 8752; predicted gene 8750; similar to archain                               |
| ard1b    | N(alpha)-acetyltransferase 11, NatA catalytic subunit                                                                                                          |
| arf1     | predicted gene 5823; ADP-ribosylation factor 1; predicted gene 8230                                                                                            |
| arf2     | ADP-ribosylation factor 2                                                                                                                                      |
| arf3     | ADP-ribosylation factor 3                                                                                                                                      |
| arf4     | ADP-ribosylation factor 4                                                                                                                                      |
| arf5     | similar to ADP-ribosylation factor; ADP-ribosylation factor 5                                                                                                  |
| arf6     | ADP-ribosylation factor 6                                                                                                                                      |
| arfgap1  | ADP-ribosylation factor GTPase activating protein 1                                                                                                            |

|           |                                                                                                                                              |
|-----------|----------------------------------------------------------------------------------------------------------------------------------------------|
| arfgap2   | ADP-ribosylation factor GTPase activating protein 2                                                                                          |
| arfgap3   | ADP-ribosylation factor GTPase activating protein 3                                                                                          |
| arfgef1   | ADP-ribosylation factor guanine nucleotide-exchange factor 1(brefeldin A-inhibited)                                                          |
| arfgef2   | ADP-ribosylation factor guanine nucleotide-exchange factor 2 (brefeldin A-inhibited)                                                         |
| arfip1    | ADP-ribosylation factor interacting protein 1                                                                                                |
| arfip2    | ADP-ribosylation factor interacting protein 2                                                                                                |
| arfrp1    | ADP-ribosylation factor related protein 1                                                                                                    |
| arhgap1   | Rho GTPase activating protein 1; predicted gene 8514                                                                                         |
| arhgap10  | Rho GTPase activating protein 10                                                                                                             |
| arhgap12  | Rho GTPase activating protein 12                                                                                                             |
| arhgap15  | Rho GTPase activating protein 15                                                                                                             |
| arhgap17  | Rho GTPase activating protein 17                                                                                                             |
| arhgap19  | Rho GTPase activating protein 19                                                                                                             |
| arhgap20  | Rho GTPase activating protein 20                                                                                                             |
| arhgap21  | Rho GTPase activating protein 21                                                                                                             |
| arhgap22  | Rho GTPase activating protein 22                                                                                                             |
| arhgap24  | Rho GTPase activating protein 24                                                                                                             |
| arhgap25  | Rho GTPase activating protein 25                                                                                                             |
| arhgap26  | RIKEN cDNA 9630014M24 gene; Rho GTPase activating protein 26; predicted gene 5820                                                            |
| arhgap27  | Rho GTPase activating protein 27; SH3 domain containing 20                                                                                   |
| arhgap29  | Rho GTPase activating protein 29                                                                                                             |
| arhgap4   | Rho GTPase activating protein 4                                                                                                              |
| arhgap5   | Rho GTPase activating protein 5                                                                                                              |
| arhgap6   | Rho GTPase activating protein 6                                                                                                              |
| arhgap9   | Rho GTPase activating protein 9                                                                                                              |
| arhgdia   | Rho GDP dissociation inhibitor (GDI) alpha                                                                                                   |
| arhgdib   | Rho, GDP dissociation inhibitor (GDI) beta                                                                                                   |
| arhgdig   | Rho GDP dissociation inhibitor (GDI) gamma                                                                                                   |
| arhgef1   | Rho guanine nucleotide exchange factor (GEF) 1                                                                                               |
| arhgef10  | Rho guanine nucleotide exchange factor (GEF) 10                                                                                              |
| arhgef10l | Rho guanine nucleotide exchange factor (GEF) 10-like                                                                                         |
| arhgef11  | Rho guanine nucleotide exchange factor (GEF) 11                                                                                              |
| arhgef12  | predicted gene 7281; predicted gene 5831; similar to SP140 nuclear body protein (predicted); Rho guanine nucleotide exchange factor (GEF) 12 |
| arhgef15  | Rho guanine nucleotide exchange factor (GEF) 15                                                                                              |
| arhgef17  | Rho guanine nucleotide exchange factor (GEF) 17                                                                                              |
| arhgef18  | rho/rac guanine nucleotide exchange factor (GEF) 18                                                                                          |
| arhgef19  | Rho guanine nucleotide exchange factor (GEF) 19                                                                                              |
| arhgef2   | rho/rac guanine nucleotide exchange factor (GEF) 2                                                                                           |
| arhgef3   | Rho guanine nucleotide exchange factor (GEF) 3                                                                                               |
| arhgef4   | Rho guanine nucleotide exchange factor (GEF) 4                                                                                               |
| arhgef5   | Rho guanine nucleotide exchange factor (GEF) 5                                                                                               |
| arhgef6   | Rac/Cdc42 guanine nucleotide exchange factor (GEF) 6                                                                                         |
| arhgef7   | Rho guanine nucleotide exchange factor (GEF7)                                                                                                |
| arhgef9   | CDC42 guanine nucleotide exchange factor (GEF) 9                                                                                             |
| arid3c    | AT rich interactive domain 3C (BRIGHT-like)                                                                                                  |
| arid5a    | AT rich interactive domain 5A (MRF1-like)                                                                                                    |
| arl1      | ADP-ribosylation factor-like 1                                                                                                               |
| arl10     | ADP-ribosylation factor-like 10                                                                                                              |
| arl13b    | ADP-ribosylation factor-like 13B                                                                                                             |
| arl14     | ADP-ribosylation factor-like 14                                                                                                              |
| arl2      | ADP-ribosylation factor-like 2                                                                                                               |
| arl2bp    | ADP-ribosylation factor-like 2 binding protein                                                                                               |
| arl3      | ADP-ribosylation factor-like 3                                                                                                               |
| arl4a     | ADP-ribosylation factor-like 4A                                                                                                              |

|            |                                                                                                                                                                                                                                                       |
|------------|-------------------------------------------------------------------------------------------------------------------------------------------------------------------------------------------------------------------------------------------------------|
| arl4c      | similar to ADP-ribosylation factor-like protein 7; ADP-ribosylation factor-like 4C                                                                                                                                                                    |
| arl4d      | ADP-ribosylation factor-like 4D; hypothetical protein LOC100044157                                                                                                                                                                                    |
| arl5a      | ADP-ribosylation factor-like 5A                                                                                                                                                                                                                       |
| arl5b      | ADP-ribosylation factor-like 5B                                                                                                                                                                                                                       |
| arl6       | ADP-ribosylation factor-like 6                                                                                                                                                                                                                        |
| arl6ip1    | ADP-ribosylation factor-like 6 interacting protein 1                                                                                                                                                                                                  |
| arl6ip2    | atlastin GTPase 2                                                                                                                                                                                                                                     |
| arl6ip4    | ADP-ribosylation factor-like 6 interacting protein 4; similar to SRp25 nuclear protein                                                                                                                                                                |
| arl6ip6    | similar to ADP-ribosylation-like factor 6-interacting protein 6; ADP-ribosylation factor-like 6 interacting protein 6                                                                                                                                 |
| arl8a      | ADP-ribosylation factor-like 8A                                                                                                                                                                                                                       |
| arl8b      | ADP-ribosylation factor-like 8B                                                                                                                                                                                                                       |
| arl9       | ADP-ribosylation factor-like 9                                                                                                                                                                                                                        |
| armc6      | armadillo repeat containing 6                                                                                                                                                                                                                         |
| armc8      | armadillo repeat containing 8                                                                                                                                                                                                                         |
| arpm1      | actin related protein M1                                                                                                                                                                                                                              |
| ars2       | CG7843 gene product from transcript CG7843-RA                                                                                                                                                                                                         |
| arsj       | arylsulfatase J                                                                                                                                                                                                                                       |
| arsk       | similar to arylsulfatase K; arylsulfatase K                                                                                                                                                                                                           |
| asa        | anti-sarcolemmal autoantibodies                                                                                                                                                                                                                       |
| asb17      | ankyrin repeat and SOCS box-containing 17                                                                                                                                                                                                             |
| asb8       | ankyrin repeat and SOCS box-containing 8                                                                                                                                                                                                              |
| ascl4      | achaete-scute complex homolog 4 (Drosophila)                                                                                                                                                                                                          |
| asna1      | arsA arsenite transporter, ATP-binding, homolog 1 (bacterial)                                                                                                                                                                                         |
| astl       | similar to Astacin-like metalloendopeptidase precursor (Oocyte astacin) (Ovastacin); astacin-like metalloendopeptidase (M12 family)                                                                                                                   |
| asxl3      | additional sex combs like 3 (Drosophila)                                                                                                                                                                                                              |
| atad3a     | ATPase family, AAA domain containing 3A                                                                                                                                                                                                               |
| atp12a     | ATPase, H+/K+ transporting, nongastric, alpha polypeptide                                                                                                                                                                                             |
| atp13a3    | ATPase type 13A3                                                                                                                                                                                                                                      |
| atp1a1     | ATPase, Na+/K+ transporting, alpha 1 polypeptide                                                                                                                                                                                                      |
| atp1a2     | ATPase, Na+/K+ transporting, alpha 2 polypeptide                                                                                                                                                                                                      |
| atp1a3     | ATPase, Na+/K+ transporting, alpha 3 polypeptide                                                                                                                                                                                                      |
| atp1a4     | ATPase, Na+/K+ transporting, alpha 4 polypeptide                                                                                                                                                                                                      |
| atp1b1     | ATPase, Na+/K+ transporting, beta 1 polypeptide                                                                                                                                                                                                       |
| atp1b2     | ATPase, Na+/K+ transporting, beta 2 polypeptide                                                                                                                                                                                                       |
| atp1b3     | ATPase, Na+/K+ transporting, beta 3 polypeptide                                                                                                                                                                                                       |
| atp1b3-rs  | ATPase, Na+/K+ transporting, beta 3 polypeptide, related sequence                                                                                                                                                                                     |
| atp1b3-rs2 | ATPase, Na+/K+ transporting, beta 3 polypeptide, related sequence 2                                                                                                                                                                                   |
| atp1b4     | ATPase, (Na+)/K+ transporting, beta 4 polypeptide                                                                                                                                                                                                     |
| atp4a      | ATPase, H+/K+ exchanging, gastric, alpha polypeptide                                                                                                                                                                                                  |
| atp4b      | ATPase, H+/K+ exchanging, beta polypeptide                                                                                                                                                                                                            |
| atp5a1     | ATP synthase, H+ transporting, mitochondrial F1 complex, alpha subunit, isoform 1                                                                                                                                                                     |
| atp5b      | ATP synthase, H+ transporting mitochondrial F1 complex, beta subunit                                                                                                                                                                                  |
| atp5c1     | ATP synthase, H+ transporting, mitochondrial F1 complex, gamma polypeptide 1                                                                                                                                                                          |
| atp5d      | ATP synthase, H+ transporting, mitochondrial F1 complex, delta subunit                                                                                                                                                                                |
| atp5e      | ATP synthase, H+ transporting, mitochondrial F1 complex, epsilon subunit                                                                                                                                                                              |
| atp5f1     | ATP synthase, H+ transporting, mitochondrial F0 complex, subunit b, isoform 1; predicted gene 12231                                                                                                                                                   |
| atp5g2     | predicted gene 10231; similar to ATP synthase, H+ transporting, mitochondrial F0 complex, subunit c (subunit 9); predicted gene 10175; predicted gene 5911; ATP synthase, H+ transporting, mitochondrial F0 complex, subunit c (subunit 9), isoform 2 |
| atp5j      | ATP synthase, H+ transporting, mitochondrial F0 complex, subunit F pseudogene; similar to ATP synthase coupling factor 6, mitochondrial precursor (ATPase subunit F6); ATP synthase, H+ transporting, mitochondrial F0 complex, subunit F             |
| atp5j2     | predicted gene 6835; ATP synthase, H+ transporting, mitochondrial F0 complex, subunit f, isoform 2; predicted gene 6581                                                                                                                               |
| atp5k      | predicted gene 2972; ATP synthase, H+ transporting, mitochondrial F1F0 complex, subunit e                                                                                                                                                             |



|               |                                                                                                                                                                                                                                                                                              |
|---------------|----------------------------------------------------------------------------------------------------------------------------------------------------------------------------------------------------------------------------------------------------------------------------------------------|
| atp5l         | predicted gene 10221; predicted gene 4602; predicted gene 9391; ATP synthase, H+ transporting, mitochondrial FO complex, subunit G2, pseudogene; predicted gene 11477; predicted gene 9712; ATP synthase, H+ transporting, mitochondrial FO complex, subunit g; predicted gene 4045          |
| atp5s         | ATP synthase, H+ transporting, mitochondrial FO complex, subunit s                                                                                                                                                                                                                           |
| atp6v1c2      | ATPase, H+ transporting, lysosomal V1 subunit C2                                                                                                                                                                                                                                             |
| atp6v1d       | ATPase, H+ transporting, lysosomal V1 subunit D                                                                                                                                                                                                                                              |
| atp8b2        | ATPase, class I, type 8B, member 2                                                                                                                                                                                                                                                           |
| atpaf1        | ATP synthase mitochondrial F1 complex assembly factor 1                                                                                                                                                                                                                                      |
| aup1          | ancient ubiquitous protein 1                                                                                                                                                                                                                                                                 |
| aw125753      | family with sequence similarity 84, member A                                                                                                                                                                                                                                                 |
| aw554918      | expressed sequence AW554918                                                                                                                                                                                                                                                                  |
| axud1         | cysteine-serine-rich nuclear protein 1                                                                                                                                                                                                                                                       |
| aym1          | activator of yeast meiotic promoters 1                                                                                                                                                                                                                                                       |
| b020018g12rik | RNA binding motif protein 8a; RIKEN cDNA B020018G12 gene                                                                                                                                                                                                                                     |
| b230208h17rik | RIKEN cDNA B230208H17 gene                                                                                                                                                                                                                                                                   |
| b230339m05rik | Ral GTPase activating protein, beta subunit (non-catalytic)                                                                                                                                                                                                                                  |
| b3galt4       | UDP-Gal:betaGlcNAc beta 1,3-galactosyltransferase, polypeptide 4                                                                                                                                                                                                                             |
| b3gnt2        | UDP-GlcNAc:betaGal beta-1,3-N-acetylglucosaminyltransferase 2                                                                                                                                                                                                                                |
| b3gnt3        | UDP-GlcNAc:betaGal beta-1,3-N-acetylglucosaminyltransferase 3                                                                                                                                                                                                                                |
| b3gnt4        | UDP-GlcNAc:betaGal beta-1,3-N-acetylglucosaminyltransferase 4                                                                                                                                                                                                                                |
| b3gnt1        | UDP-GlcNAc:betaGal beta-1,3-N-acetylglucosaminyltransferase-like 1                                                                                                                                                                                                                           |
| b4galnt3      | beta-1,4-N-acetyl-galactosaminyl transferase 3                                                                                                                                                                                                                                               |
| b4galnt4      | beta-1,4-N-acetyl-galactosaminyl transferase 4                                                                                                                                                                                                                                               |
| b4galt2       | UDP-Gal:betaGlcNAc beta 1,4- galactosyltransferase, polypeptide 2                                                                                                                                                                                                                            |
| b4galt3       | UDP-Gal:betaGlcNAc beta 1,4-galactosyltransferase, polypeptide 3                                                                                                                                                                                                                             |
| b4galt4       | UDP-Gal:betaGlcNAc beta 1,4-galactosyltransferase, polypeptide 4                                                                                                                                                                                                                             |
| b4galt6       | UDP-Gal:betaGlcNAc beta 1,4-galactosyltransferase, polypeptide 6; similar to Beta-1,4-galactosyltransferase 6 (Beta-1,4-GalTase 6) (Beta4Gal-T6) (b4Gal-T6) (UDP-galactose:beta-N-acetylglucosamine beta-1,4-galactosyltransferase 6) (UDP-Gal:beta-GlcNAc beta-1,4-galactosyltransferase 6) |
| baiap3        | BAI1-associated protein 3                                                                                                                                                                                                                                                                    |
| bas           | BALB murine sarcoma oncogene                                                                                                                                                                                                                                                                 |
| bat4          | predicted gene 5628; HLA-B associated transcript 4                                                                                                                                                                                                                                           |
| bc010304      | family with sequence similarity 120, member A                                                                                                                                                                                                                                                |
| bc013712      | cDNA sequence BC013712                                                                                                                                                                                                                                                                       |
| bc016423      | cDNA sequence BC016423                                                                                                                                                                                                                                                                       |
| bc017158      | cDNA sequence BC017158                                                                                                                                                                                                                                                                       |
| bc021395      | regulation of nuclear pre-mRNA domain containing 1A                                                                                                                                                                                                                                          |
| bc028663      | BC028663                                                                                                                                                                                                                                                                                     |
| bc029169      | family with sequence similarity 20, member A                                                                                                                                                                                                                                                 |
| bc048502      | cDNA sequence BC048502                                                                                                                                                                                                                                                                       |
| bc048679      | cDNA sequence BC048679                                                                                                                                                                                                                                                                       |
| bc065397      | cDNA sequence BC065397                                                                                                                                                                                                                                                                       |
| bc067047      | phosphatidylinositol-3,4,5-trisphosphate-dependent Rac exchange factor 1                                                                                                                                                                                                                     |
| bcam          | basal cell adhesion molecule                                                                                                                                                                                                                                                                 |
| bcar3         | breast cancer anti-estrogen resistance 3                                                                                                                                                                                                                                                     |
| bcas2         | breast carcinoma amplified sequence 2                                                                                                                                                                                                                                                        |
| bckdha        | branched chain ketoacid dehydrogenase E1, alpha polypeptide                                                                                                                                                                                                                                  |
| bckdhb        | branched chain ketoacid dehydrogenase E1, beta polypeptide; similar to 3-methyl-2-oxobutanoate dehydrogenase                                                                                                                                                                                 |
| bicd1         | bicaudal D homolog 1 (Drosophila)                                                                                                                                                                                                                                                            |
| bin3          | bridging integrator 3                                                                                                                                                                                                                                                                        |
| bivm          | basic, immunoglobulin-like variable motif containing                                                                                                                                                                                                                                         |
| blvrb         | biliverdin reductase B (flavin reductase (NADPH))                                                                                                                                                                                                                                            |
| blzf1         | basic leucine zipper nuclear factor 1                                                                                                                                                                                                                                                        |
| bnip2         | BCL2/adenovirus E1B interacting protein 2                                                                                                                                                                                                                                                    |

|               |                                                                                                                                                                                                                    |
|---------------|--------------------------------------------------------------------------------------------------------------------------------------------------------------------------------------------------------------------|
| bnipl         | BCL2/adenovirus E1B 19kD interacting protein like                                                                                                                                                                  |
| bola1         | bolA-like 1 (E. coli)                                                                                                                                                                                              |
| bola2         | bolA-like 2 (E. coli)                                                                                                                                                                                              |
| bola3         | bolA-like 3 (E. coli)                                                                                                                                                                                              |
| bpil2         | bactericidal/permeability-increasing protein-like 2                                                                                                                                                                |
| bpil3         | bactericidal/permeability-increasing protein-like 3                                                                                                                                                                |
| braf-rs1      | Braf transforming gene, related sequence 1                                                                                                                                                                         |
| brd1          | bromodomain containing 1; similar to bromodomain containing 1                                                                                                                                                      |
| bri3bp        | Bri3 binding protein                                                                                                                                                                                               |
| bspry         | B-box and SPRY domain containing                                                                                                                                                                                   |
| btbd1         | similar to BTB (POZ) domain containing 1 (predicted); BTB (POZ) domain containing 1; predicted gene 14121                                                                                                          |
| btbd2         | BTB (POZ) domain containing 2                                                                                                                                                                                      |
| btf3          | predicted gene 9308; basic transcription factor 3; predicted gene 3531; predicted gene 7973                                                                                                                        |
| bud31         | BUD31 homolog (yeast)                                                                                                                                                                                              |
| bves          | blood vessel epicardial substance                                                                                                                                                                                  |
| bxdc1         | ribosome production factor 2 homolog (S. cerevisiae)                                                                                                                                                               |
| bxdc2         | brix domain containing 2                                                                                                                                                                                           |
| bxdc5         | ribosome production factor 1 homolog (S. cerevisiae)                                                                                                                                                               |
| c1q1          | complement component 1, q subcomponent-like 1                                                                                                                                                                      |
| c230097i24rik | zinc finger and SCAN domain containing 30                                                                                                                                                                          |
| c2cd2l        | C2 calcium-dependent domain containing 2-like                                                                                                                                                                      |
| c4bp          | complement component 4 binding protein                                                                                                                                                                             |
| c4bp-ps1      | complement component 4 binding protein, pseudogene 1                                                                                                                                                               |
| c77670        | expressed sequence C77670                                                                                                                                                                                          |
| c80913        | expressed sequence C80913                                                                                                                                                                                          |
| c8a           | complement component 8, alpha polypeptide                                                                                                                                                                          |
| c8b           | complement component 8, beta polypeptide                                                                                                                                                                           |
| c8g           | complement component 8, gamma polypeptide                                                                                                                                                                          |
| c9            | complement component 9                                                                                                                                                                                             |
| cab39         | calcium binding protein 39                                                                                                                                                                                         |
| cacna1b       | calcium channel, voltage-dependent, N type, alpha 1B subunit                                                                                                                                                       |
| cacna2d1      | calcium channel, voltage-dependent, alpha2/delta subunit 1                                                                                                                                                         |
| cacna2d2      | calcium channel, voltage-dependent, alpha 2/delta subunit 2; similar to Cacna2d2 protein                                                                                                                           |
| cacna2d3      | calcium channel, voltage-dependent, alpha2/delta subunit 3                                                                                                                                                         |
| cacna2d4      | calcium channel, voltage-dependent, alpha 2/delta subunit 4                                                                                                                                                        |
| cacnb1        | calcium channel, voltage-dependent, beta 1 subunit                                                                                                                                                                 |
| cacnb2        | calcium channel, voltage-dependent, beta 2 subunit                                                                                                                                                                 |
| cacnb3        | calcium channel, voltage-dependent, beta 3 subunit                                                                                                                                                                 |
| cacnb4        | calcium channel, voltage-dependent, beta 4 subunit                                                                                                                                                                 |
| cacng1        | calcium channel, voltage-dependent, gamma subunit 1                                                                                                                                                                |
| cacng3        | calcium channel, voltage-dependent, gamma subunit 3                                                                                                                                                                |
| cacng4        | calcium channel, voltage-dependent, gamma subunit 4                                                                                                                                                                |
| cacng5        | calcium channel, voltage-dependent, gamma subunit 5                                                                                                                                                                |
| cacng6        | calcium channel, voltage-dependent, gamma subunit 6                                                                                                                                                                |
| cacng7        | calcium channel, voltage-dependent, gamma subunit 7                                                                                                                                                                |
| cacng8        | calcium channel, voltage-dependent, gamma subunit 8                                                                                                                                                                |
| camk1g        | calcium/calmodulin-dependent protein kinase I gamma                                                                                                                                                                |
| camk2b        | calcium/calmodulin-dependent protein kinase II, beta                                                                                                                                                               |
| camk2d        | calcium/calmodulin-dependent protein kinase II, delta                                                                                                                                                              |
| camk2g        | similar to Calcium/calmodulin-dependent protein kinase type II gamma chain (CaM-kinase II gamma chain) (CaM kinase II gamma subunit) (CaMK-II subunit gamma); calcium/calmodulin-dependent protein kinase II gamma |
| camkl         | calcium/calmodulin dependent protein kinase-like                                                                                                                                                                   |
| capns2        | calpain, small subunit 2                                                                                                                                                                                           |
| capza1        | capping protein (actin filament) muscle Z-line, alpha 1; similar to capping protein (actin filament) muscle Z-                                                                                                     |

|            |                                                                       |
|------------|-----------------------------------------------------------------------|
|            | line, alpha 1; predicted gene 3608; predicted gene 5920               |
| capza1-ps2 | capping protein (actin filament) muscle Z-line, alpha 1, pseudogene 2 |
| capza2     | capping protein (actin filament) muscle Z-line, alpha 2               |
| capzb      | capping protein (actin filament) muscle Z-line, beta                  |
| card6      | caspase recruitment domain family, member 6                           |
| cbl-ps1    | Casitas B-lineage lymphoma, pseudogene 1                              |
| cbx3-ps1   | chromobox homolog 3 (Drosophila HP1 gamma), pseudogene 1              |
| cbx3-ps2   | chromobox homolog 3 (Drosophila HP1 gamma), pseudogene 2              |
| cbx3-ps3   | chromobox homolog 3 (Drosophila HP1 gamma), pseudogene 3              |
| ccdc135    | coiled-coil domain containing 135                                     |
| ccdc19     | coiled-coil domain containing 19                                      |
| ccdc62     | coiled-coil domain containing 62                                      |
| ccdc65     | coiled-coil domain containing 65                                      |
| ccdc67     | coiled-coil domain containing 67                                      |
| ccdc85b    | coiled-coil domain containing 85B                                     |
| ccdc88a    | coiled coil domain containing 88A                                     |
| ccdc88b    | coiled-coil domain containing 88B                                     |
| ccdc89     | coiled-coil domain containing 89                                      |
| ccdc91     | coiled-coil domain containing 91                                      |
| ccpg1      | cell cycle progression 1                                              |
| ccpn-ps    | calcyphosine, pseudogene                                              |
| ccr111     | chemokine (C-C motif) receptor 1-like 1                               |
| ccr12      | chemokine (C-C motif) receptor-like 2                                 |
| cct2       | chaperonin containing Tcp1, subunit 2 (beta)                          |
| cct3       | chaperonin containing Tcp1, subunit 3 (gamma)                         |
| cct3-ps1   | chaperonin containing Tcp1, subunit 3 (gamma) pseudogene 1            |
| cct6a      | chaperonin containing Tcp1, subunit 6a (zeta)                         |
| cct6b      | chaperonin containing Tcp1, subunit 6b (zeta)                         |
| cct7       | chaperonin containing Tcp1, subunit 7 (eta)                           |
| cct8       | chaperonin containing Tcp1, subunit 8 (theta)                         |
| cd247      | CD247 antigen                                                         |
| cd3d       | CD3 antigen, delta polypeptide                                        |
| cd3e       | CD3 antigen, epsilon polypeptide                                      |
| cd3g       | CD3 antigen, gamma polypeptide                                        |
| cd8b1      | CD8 antigen, beta chain 1                                             |
| cdadc1     | cytidine and dCMP deaminase domain containing 1                       |
| cdc34-ps   | cell division cycle 34 homolog, pseudogene (S. cerevisiae)            |
| cdc42bpa   | CDC42 binding protein kinase alpha                                    |
| cdc42bpb   | CDC42 binding protein kinase beta                                     |
| cdc42ep1   | CDC42 effector protein (Rho GTPase binding) 1                         |
| cdc42ep2   | CDC42 effector protein (Rho GTPase binding) 2                         |
| cdc42ep3   | CDC42 effector protein (Rho GTPase binding) 3                         |
| cdc42ep4   | CDC42 effector protein (Rho GTPase binding) 4                         |
| cdc42ep5   | CDC42 effector protein (Rho GTPase binding) 5                         |
| cdc42l1    | cell division cycle 42 homolog (S. cerevisiae)-like 1                 |
| cdc42l2    | cell division cycle 42 homolog (S. cerevisiae)-like 2                 |
| cdc42l3    | cell division cycle 42 homolog (S. cerevisiae)-like 3                 |
| cdc42se1   | CDC42 small effector 1                                                |
| cdc42se2   | similar to CDC42 small effector 2; CDC42 small effector 2             |
| cdgap      | Rho GTPase activating protein 31                                      |
| cebpg      | CCAAT/enhancer binding protein (C/EBP), gamma                         |
| cenpk      | centromere protein K                                                  |
| centa1     | centaurin, alpha 1                                                    |
| centb1     | ArfGAP with coiled-coil, ankyrin repeat and PH domains 1              |
| centb2     | ArfGAP with coiled-coil, ankyrin repeat and PH domains 2              |

|           |                                                                                                                |
|-----------|----------------------------------------------------------------------------------------------------------------|
| centb5    | ArfGAP with coiled-coil, ankyrin repeat and PH domains 3                                                       |
| centd1    | centaurin, delta 1                                                                                             |
| centd2    | ArfGAP with RhoGAP domain, ankyrin repeat and PH domain 1                                                      |
| centd3    | centaurin, delta 3                                                                                             |
| centg1    | ArfGAP with GTPase domain, ankyrin repeat and PH domain 2                                                      |
| centg2    | ArfGAP with GTPase domain, ankyrin repeat and PH domain 1                                                      |
| centg3    | centaurin, gamma 3                                                                                             |
| cep350    | centrosomal protein 350                                                                                        |
| cep57     | centrosomal protein 57                                                                                         |
| cfhe      | complement component factor h, electrophoretic variant                                                         |
| cgnl1     | cingulin-like 1                                                                                                |
| chchd1    | coiled-coil-helix-coiled-coil-helix domain containing 1                                                        |
| chd6      | chromodomain helicase DNA binding protein 6; predicted gene 8291                                               |
| chic1     | cysteine-rich hydrophobic domain 1                                                                             |
| chid1     | chitinase domain containing 1                                                                                  |
| chkb      | choline kinase beta                                                                                            |
| chm       | similar to choroideremia; choroideremia                                                                        |
| chml      | choroideremia-like                                                                                             |
| chn1      | chimerin (chimaerin) 1                                                                                         |
| chn2      | chimerin (chimaerin) 2                                                                                         |
| chordc1   | cysteine and histidine-rich domain (CHORD)-containing, zinc-binding protein 1                                  |
| chpst     | chrondroprogenitor specific transcript                                                                         |
| chrna1    | cholinergic receptor, nicotinic, alpha polypeptide 1 (muscle); similar to acetylcholine receptor alpha-subunit |
| chrna2    | cholinergic receptor, nicotinic, alpha polypeptide 2 (neuronal)                                                |
| chrna6    | cholinergic receptor, nicotinic, alpha polypeptide 6                                                           |
| chrnb1    | cholinergic receptor, nicotinic, beta polypeptide 1 (muscle)                                                   |
| chrnb3    | cholinergic receptor, nicotinic, beta polypeptide 3                                                            |
| chrnb4    | cholinergic receptor, nicotinic, beta polypeptide 4                                                            |
| chrnd     | cholinergic receptor, nicotinic, delta polypeptide                                                             |
| chrne     | cholinergic receptor, nicotinic, epsilon polypeptide                                                           |
| chrng     | cholinergic receptor, nicotinic, gamma polypeptide                                                             |
| cib3      | calcium and integrin binding family member 3                                                                   |
| cirbp-rs1 | cold inducible RNA binding protein, related sequence 1                                                         |
| cirbp-rs3 | cold inducible RNA binding protein, related sequence 3                                                         |
| clec4b1   | C-type lectin domain family 4, member b1                                                                       |
| clmn      | calmin                                                                                                         |
| clp1      | CLP1, cleavage and polyadenylation factor I subunit, homolog (S. cerevisiae)                                   |
| clybl     | citrate lyase beta like                                                                                        |
| cm11      | N-acetyltransferase 8B; camello-like 1                                                                         |
| cm12      | camello-like 2                                                                                                 |
| cm13      | predicted gene 4477; camello-like 3                                                                            |
| cm15      | camello-like 5                                                                                                 |
| cnbp1     | cellular nucleic acid binding protein-like 1                                                                   |
| cnbp2     | cellular nucleic acid binding protein-like 2                                                                   |
| cngb1     | cyclic nucleotide gated channel beta 1                                                                         |
| cnih      | cornichon homolog (Drosophila)                                                                                 |
| cnksr1    | connector enhancer of kinase suppressor of Ras 1                                                               |
| cnnm1     | cyclin M1                                                                                                      |
| cnnm2     | cyclin M2                                                                                                      |
| cnnm3     | cyclin M3                                                                                                      |
| cnot1     | predicted gene 6158; CCR4-NOT transcription complex, subunit 1                                                 |
| cnot8     | CCR4-NOT transcription complex, subunit 8                                                                      |
| col12a1   | collagen, type XII, alpha 1                                                                                    |
| col13a1   | collagen, type XIII, alpha 1                                                                                   |
| col16a1   | collagen, type XVI, alpha 1                                                                                    |

|         |                                                                                    |
|---------|------------------------------------------------------------------------------------|
| col19a1 | collagen, type XIX, alpha 1                                                        |
| col27a1 | collagen, type XXVII, alpha 1                                                      |
| col4a2  | collagen, type IV, alpha 2                                                         |
| col4a4  | collagen, type IV, alpha 4                                                         |
| col4a5  | collagen, type IV, alpha 5                                                         |
| col4a6  | collagen, type IV, alpha 6                                                         |
| col5a1  | collagen, type V, alpha 1                                                          |
| col5a2  | collagen, type V, alpha 2                                                          |
| col5a3  | collagen, type V, alpha 3                                                          |
| col6a1  | collagen, type VI, alpha 1                                                         |
| col6a2  | collagen, type VI, alpha 2                                                         |
| col6a3  | collagen, type VI, alpha 3                                                         |
| col8a1  | collagen, type VIII, alpha 1                                                       |
| col8a2  | collagen, type VIII, alpha 2                                                       |
| comtd1  | catechol-O-methyltransferase domain containing 1                                   |
| copa    | coatomer protein complex subunit alpha                                             |
| copb1   | coatomer protein complex, subunit beta 1                                           |
| copb2   | coatomer protein complex, subunit beta 2 (beta prime)                              |
| cope    | coatomer protein complex, subunit epsilon                                          |
| copg    | coatomer protein complex, subunit gamma                                            |
| copg2   | coatomer protein complex, subunit gamma 2                                          |
| cops4   | COP9 (constitutive photomorphogenic) homolog, subunit 4 (Arabidopsis thaliana)     |
| copz1   | coatomer protein complex, subunit zeta 1                                           |
| copz2   | coatomer protein complex, subunit zeta 2                                           |
| coq4    | coenzyme Q4 homolog (yeast)                                                        |
| coro2a  | coronin, actin binding protein 2A                                                  |
| cox7a2l | cytochrome c oxidase subunit VIIa polypeptide 2-like; predicted gene 6969          |
| cpn2    | carboxypeptidase N, polypeptide 2                                                  |
| cpne3   | copine III                                                                         |
| cpne4   | copine IV                                                                          |
| cpne6   | copine VI                                                                          |
| cpne8   | copine VIII                                                                        |
| cpsf3l  | cleavage and polyadenylation specific factor 3-like                                |
| cpxm2   | carboxypeptidase X 2 (M14 family)                                                  |
| creb5   | RIKEN cDNA 9430076C15 gene; cAMP responsive element binding protein 5              |
| creg2   | cellular repressor of E1A-stimulated genes 2                                       |
| creld2  | cysteine-rich with EGF-like domains 2                                              |
| crlf2   | cytokine receptor-like factor 2                                                    |
| cryba1  | crystallin, beta A1                                                                |
| cryba2  | crystallin, beta A2                                                                |
| cryba4  | crystallin, beta A4                                                                |
| crybb1  | crystallin, beta B1                                                                |
| crybb2  | crystallin, beta B2                                                                |
| crybb3  | crystallin, beta B3                                                                |
| cryg    | crystallin gamma complex                                                           |
| cryga   | crystallin, gamma A                                                                |
| crygb   | crystallin, gamma B                                                                |
| crygc   | crystallin, gamma C                                                                |
| crygd   | crystallin, gamma D                                                                |
| cryge   | crystallin, gamma E                                                                |
| crygf   | crystallin, gamma F                                                                |
| crygn   | crystallin, gamma N                                                                |
| crygs   | crystallin, gamma S                                                                |
| cryz1l  | crystallin, zeta (quinone reductase)-like 1                                        |
| csf2ra  | colony stimulating factor 2 receptor, alpha, low-affinity (granulocyte-macrophage) |

|               |                                                                                                                                                                                                               |
|---------------|---------------------------------------------------------------------------------------------------------------------------------------------------------------------------------------------------------------|
| csf2rb2       | colony stimulating factor 2 receptor, beta 2, low-affinity (granulocyte-macrophage)                                                                                                                           |
| csmd2         | CUB and Sushi multiple domains 2                                                                                                                                                                              |
| csn1s1        | casein alpha s1                                                                                                                                                                                               |
| csn1s2a       | casein alpha s2-like A                                                                                                                                                                                        |
| csn1s2b       | casein alpha s2-like B                                                                                                                                                                                        |
| csn2          | casein beta                                                                                                                                                                                                   |
| csn3          | casein kappa                                                                                                                                                                                                  |
| csnk1g1       | casein kinase 1, gamma 1                                                                                                                                                                                      |
| csnk1g2       | casein kinase 1, gamma 2                                                                                                                                                                                      |
| csnk1g3       | casein kinase 1, gamma 3; similar to casein kinase 1, gamma 3                                                                                                                                                 |
| csnk2a1-ps1   | casein kinase 2, alpha 1 polypeptide, pseudogene 1                                                                                                                                                            |
| csnk2a1-rs2   | casein kinase 2, alpha 1, related sequence 2                                                                                                                                                                  |
| csnk2a1-rs3   | casein kinase 2, alpha 1, related sequence 3                                                                                                                                                                  |
| csmp2         | cysteine-serine-rich nuclear protein 2                                                                                                                                                                        |
| csmp3         | cysteine-serine-rich nuclear protein 3                                                                                                                                                                        |
| csrp2bp       | cysteine and glycine-rich protein 2 binding protein; similar to cysteine and glycine-rich protein 2 binding protein; similar to CSRP2BP; hypothetical protein LOC100048725                                    |
| ctf2          | cardiotrophin 2                                                                                                                                                                                               |
| ctla2b        | cytotoxic T lymphocyte-associated protein 2 beta                                                                                                                                                              |
| ctps2         | cytidine 5'-triphosphate synthase 2                                                                                                                                                                           |
| ctrb1         | chymotrypsinogen B1                                                                                                                                                                                           |
| ctrc          | chymotrypsin C (caldecrin)                                                                                                                                                                                    |
| ctxn3         | cortexin 3                                                                                                                                                                                                    |
| cutc          | cutC copper transporter homolog (E.coli)                                                                                                                                                                      |
| cx3cl1-rs1    | chemokine (C-X3-C motif) ligand 1, related sequence 1                                                                                                                                                         |
| cxx1a         | CAAX box 1 homolog A (human); CAAX box 1 homolog B (human); similar to mammalian retrotransposon derived 8b                                                                                                   |
| cxx1c         | CAAX box 1 homolog C (human)                                                                                                                                                                                  |
| cycl          | cyclin-like                                                                                                                                                                                                   |
| cyp11d        | cytochrome P450, 11d                                                                                                                                                                                          |
| cyp2a         | cytochrome P450, family 2, subfamily a                                                                                                                                                                        |
| cyp2a12       | cytochrome P450, family 2, subfamily a, polypeptide 12; cytochrome P450, family 2, subfamily a, polypeptide 22                                                                                                |
| cyp2a5        | cytochrome P450, family 2, subfamily a, polypeptide 21, pseudogene; cytochrome P450, family 2, subfamily a, polypeptide 5                                                                                     |
| cyp2b13       | cytochrome P450, family 2, subfamily b, polypeptide 13                                                                                                                                                        |
| cyp2c40       | cytochrome P450, family 2, subfamily c, polypeptide 40; similar to RIKEN cDNA C730004C24 gene; cytochrome P450, family 2, subfamily c, polypeptide 69; cytochrome P450, family 2, subfamily c, polypeptide 67 |
| cyp2d         | cytochrome P450, 2d region                                                                                                                                                                                    |
| cyp2d10       | cytochrome P450, family 2, subfamily d, polypeptide 10                                                                                                                                                        |
| cyp2d11       | cytochrome P450, family 2, subfamily d, polypeptide 11                                                                                                                                                        |
| cyp2d9        | cytochrome P450, family 2, subfamily d, polypeptide 9                                                                                                                                                         |
| cyyr1         | cysteine and tyrosine-rich protein 1                                                                                                                                                                          |
| d030074e01rik | RIKEN cDNA D030074E01 gene                                                                                                                                                                                    |
| d0hxs9928e    | family with sequence similarity 50, member A                                                                                                                                                                  |
| d0kist4       | DNA segment, KIST 4                                                                                                                                                                                           |
| d10ertd610e   | DNA segment, Chr 10, ERATO Doi 610, expressed                                                                                                                                                                 |
| d10mit116     | DNA segment, Chr 10, Massachusetts Institute of Technology 116                                                                                                                                                |
| d10mit260     | DNA Segment, Chr 10, Massachusetts Institute of Technology 260                                                                                                                                                |
| d11jkn1e      | DNA segment, Chr 11, Ian Jackson-1, expressed                                                                                                                                                                 |
| d11mit109     | DNA segment, Chr 11, Massachusetts Institute of Technology 109                                                                                                                                                |
| d11mit139     | DNA segment, Chr 11, Massachusetts Institute of Technology 139                                                                                                                                                |
| d11mit174     | DNA segment, Chr 11, Massachusetts Institute of Technology 174                                                                                                                                                |
| d11mit188     | DNA segment, Chr 11, Massachusetts Institute of Technology 188                                                                                                                                                |
| d11mit205     | DNA segment, Chr 11, Massachusetts Institute of Technology 205                                                                                                                                                |
| d11mit208     | DNA segment, Chr 11, Massachusetts Institute of Technology 208                                                                                                                                                |

|               |                                                                 |
|---------------|-----------------------------------------------------------------|
| d11mit258     | DNA segment, Chr 11, Massachusetts Institute of Technology 258  |
| d11mit51      | DNA segment, Chr 11, Massachusetts Institute of Technology 51   |
| d11mit84      | DNA segment, Chr 11, Massachusetts Institute of Technology 84   |
| d12ertd673e   | DNA segment, Chr 12, ERATO Doi 673, expressed                   |
| d12mit149     | DNA segment, Chr 12, Massachusetts Institute of Technology 149  |
| d12mit182     | DNA segment, Chr 12, Massachusetts Institute of Technology 182  |
| d12mit238     | DNA segment, Chr 12, Massachusetts Institute of Technology 238  |
| d13mit130     | DNA segment, Chr 13, Massachusetts Institute of Technology 130  |
| d13mit260     | DNA segment, Chr 13, Massachusetts Institute of Technology 260  |
| d13mit31      | DNA segment, Chr 13, Massachusetts Institute of Technology 31   |
| d13mit91      | DNA segment, Chr 13, Massachusetts Institute of Technology 91   |
| d14ertd574e   | DNA segment, Chr 14, ERATO Doi 574, expressed                   |
| d14mit101     | DNA segment, Chr 14, Massachusetts Institute of Technology 101  |
| d14mit104     | DNA segment, Chr 14, Massachusetts Institute of Technology 104  |
| d14mit113     | DNA segment, Chr 14, Massachusetts Institute of Technology 113  |
| d14mit116     | DNA segment, Chr 14, Massachusetts Institute of Technology 116  |
| d14mit142     | DNA segment, Chr 14, Massachusetts Institute of Technology 142  |
| d14mit173     | DNA segment, Chr 14, Massachusetts Institute of Technology 173  |
| d14mit45      | DNA segment, Chr 14, Massachusetts Institute of Technology 45   |
| d14mit56      | DNA segment, Chr 14, Massachusetts Institute of Technology 56   |
| d14mit60      | DNA segment, Chr 14, Massachusetts Institute of Technology 60   |
| d14mit62      | DNA segment, Chr 14, Massachusetts Institute of Technology 62   |
| d15mit188a    | DNA segment, Chr 15, Massachusetts Institute of Technology 188a |
| d15mit198     | DNA segment, Chr 15, Massachusetts Institute of Technology 198  |
| d15mit72      | DNA segment, Chr 15, Massachusetts Institute of Technology 72   |
| d16ertd6e     | DNA segment, Chr 16, ERATO Doi 6, expressed                     |
| d16mit179     | DNA segment, Chr 16, Massachusetts Institute of Technology 179  |
| d16mit26      | DNA segment, Chr 16, Massachusetts Institute of Technology 26   |
| d16mit69      | DNA segment, Chr 16, Massachusetts Institute of Technology 69   |
| d17h6s53e     | DNA segment, Chr 17, human D6S53E                               |
| d17mit196     | DNA segment, Chr 17, Massachusetts Institute of Technology 196  |
| d17mit7       | DNA segment, Chr 17, Massachusetts Institute of Technology 7    |
| d18ertd653e   | DNA segment, Chr 18, ERATO Doi 653, expressed                   |
| d19mit24      | DNA segment, Chr 19, Massachusetts Institute of Technology 24   |
| d19mit66      | DNA segment, Chr 19, Massachusetts Institute of Technology 66   |
| d19mit75      | DNA segment, Chr 19, Massachusetts Institute of Technology 75   |
| d19rp19e      | DNA segment, Chr 19, Roswell Park 19, expressed                 |
| d1ertd57e     | DNA segment, Chr 1, ERATO Doi 57, expressed                     |
| d1mit213      | DNA segment, Chr 1, Massachusetts Institute of Technology 213   |
| d1mit330      | DNA segment, Chr 1, Massachusetts Institute of Technology 330   |
| d1mit388      | DNA segment, Chr 1, Massachusetts Institute of Technology 388   |
| d1mit488      | DNA Segment, Chr 1 Massachusetts Institute of Technology 488    |
| d2ertd337e    | DNA segment, Chr 2, ERATO Doi 337, expressed                    |
| d2mit19       | DNA segment, Chr 2, Massachusetts Institute of Technology 19    |
| d2mit434      | DNA Segment, Chr 2, Massachusetts Institute of Technology 434   |
| d2mit496      | DNA Segment, Chr 2 Massachusetts Institute of Technology 496    |
| d2mit97       | DNA segment, Chr 2, Massachusetts Institute of Technology 97    |
| d330017j20rik | family with sequence similarity 40, member B                    |
| d3mit121      | DNA segment, Chr 3, Massachusetts Institute of Technology 121   |
| d3mit250      | DNA segment, Chr 3, Massachusetts Institute of Technology 250   |
| d3mit277      | DNA segment, Chr 3, Massachusetts Institute of Technology 277   |
| d4mit100      | DNA segment, Chr 4, Massachusetts Institute of Technology 100   |
| d4mit110      | DNA segment, Chr 4, Massachusetts Institute of Technology 110   |
| d4mit116      | DNA segment, Chr 4, Massachusetts Institute of Technology 116   |
| d4mit144      | DNA segment, Chr 4, Massachusetts Institute of Technology 144   |

|               |                                                                              |
|---------------|------------------------------------------------------------------------------|
| d4mit152      | DNA segment, Chr 4, Massachusetts Institute of Technology 152                |
| d4mit287      | DNA segment, Chr 4, Massachusetts Institute of Technology 287                |
| d4mit339      | DNA segment, Chr 4, Massachusetts Institute of Technology 339                |
| d530033c11rik | UTP23, small subunit (SSU) processome component, homolog (yeast)             |
| d5mit193      | DNA segment, Chr 5, Massachusetts Institute of Technology 193                |
| d5mit202      | DNA segment, Chr 5, Massachusetts Institute of Technology 202                |
| d5mit317      | DNA segment, Chr 5, Massachusetts Institute of Technology 317                |
| d5mit318      | DNA segment, Chr 5, Massachusetts Institute of Technology 318                |
| d5pas1        | DNA segment, Chr 5, Pasteur Institute 1                                      |
| d6kcc1        | DNA segment, Chr 6, Kimmel Cancer Center 1                                   |
| d6mit118      | DNA segment, Chr 6, Massachusetts Institute of Technology 118                |
| d6mit252      | DNA segment, Chr 6, Massachusetts Institute of Technology 252                |
| d6mit33       | DNA segment, Chr 6, Massachusetts Institute of Technology 33                 |
| d6mit59       | DNA segment, Chr 6, Massachusetts Institute of Technology 59                 |
| d6mm5e        | DNA segment, Chr 6, Miriam Meisler 5, expressed                              |
| d730040f13rik | RIKEN cDNA D730040F13 gene                                                   |
| d7h19f11s1    | DNA segment, Chr 7, human D19F11S1                                           |
| d7mit151      | DNA segment, Chr 7, Massachusetts Institute of Technology 151                |
| d7mit177      | DNA segment, Chr 7, Massachusetts Institute of Technology 177                |
| d7mit242      | DNA segment, Chr 7, Massachusetts Institute of Technology 242                |
| d7mit357      | DNA segment, Chr 7, Massachusetts Institute of Technology 357                |
| d7mit362      | DNA segment, Chr 7, Massachusetts Institute of Technology 362                |
| d7mit72       | DNA segment, Chr 7, Massachusetts Institute of Technology 72                 |
| d7mit98       | DNA segment, Chr 7, Massachusetts Institute of Technology 98                 |
| d8ertd738e    | DNA segment, Chr 8, ERATO Doi 738, expressed                                 |
| d8ertd82e     | DNA segment, Chr 8, ERATO Doi 82, expressed                                  |
| d8mit280      | DNA segment, Chr 8, Massachusetts Institute of Technology 280                |
| d8mit297      | DNA Segment, Chr 8, Massachusetts Institute of Technology 297                |
| d8mit336      | DNA segment, Chr 8, Massachusetts Institute of Technology 336                |
| d8mit96       | DNA segment, Chr 8, Massachusetts Institute of Technology 96                 |
| d8mit98       | DNA segment, Chr 8, Massachusetts Institute of Technology 98                 |
| d930005d10rik | Ras association and DIL domains                                              |
| d930014e17rik | RIKEN cDNA D930014E17 gene                                                   |
| d9citb3       | DNA segment, Chr 9, California Institute of Technology, Biology Department 3 |
| d9mit133      | DNA segment, Chr 9, Massachusetts Institute of Technology 133                |
| d9mit150      | DNA segment, Chr 9, Massachusetts Institute of Technology 150                |
| d9mit215      | DNA segment, Chr 9, Massachusetts Institute of Technology 215                |
| d9mit223      | DNA segment, Chr 9, Massachusetts Institute of Technology 223                |
| d9mit245      | DNA segment, Chr 9, Massachusetts Institute of Technology 245                |
| d9mit259      | DNA segment, Chr 9, Massachusetts Institute of Technology 259                |
| d9mit260      | DNA segment, Chr 9, Massachusetts Institute of Technology 260                |
| d9mit261      | DNA segment, Chr 9, Massachusetts Institute of Technology 261                |
| d9mit263      | DNA segment, Chr 9, Massachusetts Institute of Technology 263                |
| d9mit270      | DNA segment, Chr 9, Massachusetts Institute of Technology 270                |
| d9mit289      | DNA segment, Chr 9, Massachusetts Institute of Technology 289                |
| d9mit304      | DNA Segment, Chr 9, Massachusetts Institute of Technology 304                |
| d9mit48       | DNA segment, Chr 9, Massachusetts Institute of Technology 48                 |
| d9mit60       | DNA segment, Chr 9, Massachusetts Institute of Technology 60                 |
| d9mit61       | DNA segment, Chr 9, Massachusetts Institute of Technology 61                 |
| dak           | dihydroxyacetone kinase 2 homolog (yeast)                                    |
| dars          | aspartyl-tRNA synthetase                                                     |
| dbt           | dihydrolipoamide branched chain transacylase E2                              |
| dcdc2b        | predicted gene 12964                                                         |
| dchs2         | dachsous 2 (Drosophila)                                                      |
| dcpp2         | demilune cell and parotid protein 2                                          |



|          |                                                                                                   |
|----------|---------------------------------------------------------------------------------------------------|
| dcp3     | demilune cell and parotid protein 3                                                               |
| ddef1    | ArfGAP with SH3 domain, ankyrin repeat and PH domain1                                             |
| ddef2    | ArfGAP with SH3 domain, ankyrin repeat and PH domain 2                                            |
| ddef11   | ArfGAP with SH3 domain, ankyrin repeat and PH domain 3                                            |
| ddx19b   | DEAD (Asp-Glu-Ala-Asp) box polypeptide 19b                                                        |
| ddx41    | DEAD (Asp-Glu-Ala-Asp) box polypeptide 41                                                         |
| ddx42    | DEAD (Asp-Glu-Ala-Asp) box polypeptide 42                                                         |
| ddx47    | DEAD (Asp-Glu-Ala-Asp) box polypeptide 47                                                         |
| ddx49    | DEAD (Asp-Glu-Ala-Asp) box polypeptide 49                                                         |
| ddx50    | predicted gene 8228; DEAD (Asp-Glu-Ala-Asp) box polypeptide 50                                    |
| ddx54    | DEAD (Asp-Glu-Ala-Asp) box polypeptide 54                                                         |
| ddx55    | DEAD (Asp-Glu-Ala-Asp) box polypeptide 55                                                         |
| ddx5-ps1 | DEAD (Asp-Glu-Ala-Asp) box polypeptide 5, pseudogene 1                                            |
| deb1     | differentially expressed in B16F10 1                                                              |
| def6     | differentially expressed in FDCP 6                                                                |
| def8     | differentially expressed in FDCP 8                                                                |
| defb29   | defensin beta 29                                                                                  |
| dennd4a  | DENN/MADD domain containing 4A                                                                    |
| dennd4b  | DENN/MADD domain containing 4B                                                                    |
| dennd4c  | DENN/MADD domain containing 4C                                                                    |
| depc2    | DEP domain containing 2                                                                           |
| dgkb     | diacylglycerol kinase, beta                                                                       |
| dgkd     | diacylglycerol kinase, delta                                                                      |
| dgkg     | diacylglycerol kinase, gamma                                                                      |
| dgkh     | diacylglycerol kinase, eta                                                                        |
| dgkq     | diacylglycerol kinase, theta                                                                      |
| dhdds    | dehydrodolichyl diphosphate synthase                                                              |
| dhx15    | DEAH (Asp-Glu-Ala-His) box polypeptide 15                                                         |
| dhx16    | DEAH (Asp-Glu-Ala-His) box polypeptide 16                                                         |
| dhx29    | DEAH (Asp-Glu-Ala-His) box polypeptide 29                                                         |
| dhx35    | predicted gene 4713; DEAH (Asp-Glu-Ala-His) box polypeptide 35; hypothetical protein LOC100046264 |
| dhx36    | DEAH (Asp-Glu-Ala-His) box polypeptide 36                                                         |
| dhx8     | DEAH (Asp-Glu-Ala-His) box polypeptide 8                                                          |
| diap2    | diaphanous homolog 2 (Drosophila)                                                                 |
| dip2a    | DIP2 disco-interacting protein 2 homolog A (Drosophila); similar to mKIAA0184 protein             |
| diras1   | DIRAS family, GTP-binding RAS-like 1                                                              |
| diras2   | DIRAS family, GTP-binding RAS-like 2                                                              |
| dis3     | DIS3 mitotic control homolog (S. cerevisiae)                                                      |
| dmkn     | dermokine                                                                                         |
| dmrtc1a  | DMRT-like family C1a                                                                              |
| dmrtc1b  | DMRT-like family C1b                                                                              |
| dmrtc1c  | DMRT-like family C1c2; DMRT-like family C1c                                                       |
| dmxl1    | Dmx-like 1                                                                                        |
| dmxl2    | Dmx-like 2                                                                                        |
| dnaja2   | DnaJ (Hsp40) homolog, subfamily A, member 2                                                       |
| dnajb13  | DnaJ (Hsp40) related, subfamily B, member 13                                                      |
| dnajb3   | DnaJ (Hsp40) homolog, subfamily B, member 3                                                       |
| dnajc1   | DnaJ (Hsp40) homolog, subfamily C, member 1                                                       |
| dnajc11  | DnaJ (Hsp40) homolog, subfamily C, member 11                                                      |
| dnajc12  | DnaJ (Hsp40) homolog, subfamily C, member 12                                                      |
| dnajc21  | DnaJ (Hsp40) homolog, subfamily C, member 21                                                      |
| dnajc4   | DnaJ (Hsp40) homolog, subfamily C, member 4                                                       |
| dnajc5   | DnaJ (Hsp40) homolog, subfamily C, member 5                                                       |
| dnajc5b  | DnaJ (Hsp40) homolog, subfamily C, member 5 beta                                                  |
| dnajc9   | DnaJ (Hsp40) homolog, subfamily C, member 9                                                       |

|               |                                                                                                                       |
|---------------|-----------------------------------------------------------------------------------------------------------------------|
| dnase1l1      | deoxyribonuclease 1-like 1                                                                                            |
| dnase1l3      | deoxyribonuclease 1-like 3                                                                                            |
| dnmlp1        | dynammin-like protein 1                                                                                               |
| dntt          | deoxynucleotidyltransferase, terminal                                                                                 |
| dock1         | dedicator of cytokinesis 1                                                                                            |
| dock10        | dedicator of cytokinesis 10                                                                                           |
| dock11        | dedicator of cytokinesis 11                                                                                           |
| dock2         | dedicator of cyto-kinesis 2                                                                                           |
| dock4         | dedicator of cytokinesis 4                                                                                            |
| dock6         | dedicator of cytokinesis 6                                                                                            |
| dock9         | dedicator of cytokinesis 9                                                                                            |
| dolpp1        | dolichyl pyrophosphate phosphatase 1                                                                                  |
| dopey1        | dopey family member 1                                                                                                 |
| dopey2        | dopey family member 2                                                                                                 |
| dpf2          | D4, zinc and double PHD fingers family 2                                                                              |
| dph2          | DPH2 homolog (S. cerevisiae)                                                                                          |
| dph3          | DPH3 homolog (KT111, S. cerevisiae)                                                                                   |
| dph4          | DnaJ (Hsp40) homolog, subfamily C, member 24                                                                          |
| dpm3          | dolichyl-phosphate mannosyltransferase polypeptide 3                                                                  |
| dpy30         | dpy-30 homolog (C. elegans); predicted gene 2059; similar to RIKEN cDNA 2810410M20 gene                               |
| dqx1          | DEAQ RNA-dependent ATPase                                                                                             |
| drap1         | Dr1 associated protein 1 (negative cofactor 2 alpha); similar to Dr1 associated protein 1 (negative cofactor 2 alpha) |
| drb1          | dopamine receptor binding 1                                                                                           |
| drg1          | developmentally regulated GTP binding protein 1                                                                       |
| drg2          | hypothetical protein LOC674305; predicted gene 8918; developmentally regulated GTP binding protein 2                  |
| dscr3         | Down syndrome critical region gene 3                                                                                  |
| dsg1c         | desmoglein 1 gamma                                                                                                    |
| dtd1          | similar to D-tyrosyl-tRNA deacylase 1; D-tyrosyl-tRNA deacylase 1 homolog (S. cerevisiae)                             |
| dtna          | dystrobrevin alpha                                                                                                    |
| dtwd2         | DTW domain containing 2                                                                                               |
| dub2          | ubiquitin specific peptidase 17-like 5                                                                                |
| dub3          | predicted gene 6596                                                                                                   |
| dub4          | deubiquitinating enzyme 4                                                                                             |
| dullard       | similar to Dullard homolog (Xenopus laevis); Dullard homolog (Xenopus laevis)                                         |
| dusp15        | dual specificity phosphatase-like 15                                                                                  |
| dvb11-1       | V11<+> T-cell deletion 1                                                                                              |
| dvb11-2       | V11<+> T-cell deletion 2                                                                                              |
| dvb11-3       | V11<+> T-cell deletion 3                                                                                              |
| dxcp3         | dexamethasone induced cleft palate 3                                                                                  |
| dxhxs101      | DNA segment, Chr X, human DXS101                                                                                      |
| dxhxs178      | DNA segment, Chr X, human DXS178                                                                                      |
| dxmit39       | DNA segment, Chr X, Massachusetts Institute of Technology 39                                                          |
| dxmit49       | DNA segment, Chr X, Massachusetts Institute of Technology 49                                                          |
| dxmit85       | DNA segment, Chr X, Massachusetts Institute of Technology 85                                                          |
| dxpas19       | DNA segment, Chr X, Pasteur Institute 19                                                                              |
| dxpas23       | DNA segment, Chr X, Pasteur Institute 23                                                                              |
| dzip1         | DAZ interacting protein 1                                                                                             |
| e130112l23rik | RIKEN cDNA E130112L23 gene                                                                                            |
| e330026b02rik | collagen, type VI, alpha 6                                                                                            |
| ea4           | erythrocyte antigen 4                                                                                                 |
| eae1          | experimental allergic encephalomyelitis susceptibility1                                                               |
| ect2          | ect2 oncogene                                                                                                         |
| edc3          | enhancer of mRNA decapping 3 homolog (S. cerevisiae)                                                                  |
| edil3         | EGF-like repeats and discoidin I-like domains 3                                                                       |

|              |                                                                                                                                                                                                                                                                                                                                     |
|--------------|-------------------------------------------------------------------------------------------------------------------------------------------------------------------------------------------------------------------------------------------------------------------------------------------------------------------------------------|
| eef1a1       | predicted gene 5869; predicted gene 7161; predicted gene 7105; predicted gene 5822; similar to eukaryotic translation elongation factor 1 alpha 1; predicted gene 6192; predicted gene 6392; predicted gene 6767; predicted gene 6170; predicted gene 6548; predicted gene 6789; eukaryotic translation elongation factor 1 alpha 1 |
| eef1b2       | eukaryotic translation elongation factor 1 beta 2                                                                                                                                                                                                                                                                                   |
| eef1d        | predicted gene 11675; eukaryotic translation elongation factor 1 delta (guanine nucleotide exchange protein)                                                                                                                                                                                                                        |
| eef1g        | predicted gene 4462; similar to eukaryotic translation elongation factor 1 gamma; predicted gene 9276; predicted gene 5525; eukaryotic translation elongation factor 1 gamma; similar to Elongation factor 1-gamma (EF-1-gamma) (eEF-1B gamma); predicted gene 4366                                                                 |
| efhd1        | EF hand domain containing 1                                                                                                                                                                                                                                                                                                         |
| eg208426     | IQ motif containing J                                                                                                                                                                                                                                                                                                               |
| eg238217     | ribosomal protein L10-like                                                                                                                                                                                                                                                                                                          |
| eg382639     | zinc finger and BTB domain containing 42                                                                                                                                                                                                                                                                                            |
| eg436240     | forkhead box R2                                                                                                                                                                                                                                                                                                                     |
| eg622901     | predicted gene 6368                                                                                                                                                                                                                                                                                                                 |
| eg627648     | kelch-like 3 (Drosophila)                                                                                                                                                                                                                                                                                                           |
| eg629860     | immunoglobulin heavy variable V1-12                                                                                                                                                                                                                                                                                                 |
| eg630061     | T cell receptor alpha variable 7-5                                                                                                                                                                                                                                                                                                  |
| eg630579     | zinc finger protein 80                                                                                                                                                                                                                                                                                                              |
| eg653016     | predicted gene 7325                                                                                                                                                                                                                                                                                                                 |
| eg665033     | collagen, type VI, alpha 5                                                                                                                                                                                                                                                                                                          |
| eg665419     | RAB11b, member RAS oncogene family, pseudogene 2                                                                                                                                                                                                                                                                                    |
| eg667604     | predicted gene 8721                                                                                                                                                                                                                                                                                                                 |
| eg667683     | immunoglobulin kappa variable 4-59                                                                                                                                                                                                                                                                                                  |
| eg668389     | immunoglobulin heavy variable V2-4                                                                                                                                                                                                                                                                                                  |
| eg668723     | amylase 2, pseudogene 1                                                                                                                                                                                                                                                                                                             |
| egf18        | EGF-like domain 8                                                                                                                                                                                                                                                                                                                   |
| eif1ad       | eukaryotic translation initiation factor 1A domain containing                                                                                                                                                                                                                                                                       |
| eif1b        | eukaryotic translation initiation factor 1B                                                                                                                                                                                                                                                                                         |
| eif2b1       | eukaryotic translation initiation factor 2B, subunit 1 (alpha)                                                                                                                                                                                                                                                                      |
| eif2b2       | eukaryotic translation initiation factor 2B, subunit 2 beta                                                                                                                                                                                                                                                                         |
| eif2b3       | eukaryotic translation initiation factor 2B, subunit 3                                                                                                                                                                                                                                                                              |
| eif2b4       | eukaryotic translation initiation factor 2B, subunit 4 delta                                                                                                                                                                                                                                                                        |
| eif2s2       | similar to Eif2s2 protein; eukaryotic translation initiation factor 2, subunit 2 (beta)                                                                                                                                                                                                                                             |
| eif2s3x      | eukaryotic translation initiation factor 2, subunit 3, structural gene X-linked; similar to translation initiation factor eIF-2 gamma subunit; predicted gene 2223                                                                                                                                                                  |
| eif3b        | hypothetical protein LOC100047993; eukaryotic translation initiation factor 3, subunit B                                                                                                                                                                                                                                            |
| eif3d        | eukaryotic translation initiation factor 3, subunit D                                                                                                                                                                                                                                                                               |
| eif3g        | eukaryotic translation initiation factor 3, subunit G                                                                                                                                                                                                                                                                               |
| eif3i        | eukaryotic translation initiation factor 3, subunit I                                                                                                                                                                                                                                                                               |
| eif4e2       | eukaryotic translation initiation factor 4E member 2                                                                                                                                                                                                                                                                                |
| eif4ebp1-ps1 | eukaryotic translation initiation factor 4E binding protein 1, pseudogene 1                                                                                                                                                                                                                                                         |
| eif4ebp1-ps2 | eukaryotic translation initiation factor 4E binding protein 1, pseudogene 2                                                                                                                                                                                                                                                         |
| eif5         | similar to Eukaryotic translation initiation factor 5; eukaryotic translation initiation factor 5                                                                                                                                                                                                                                   |
| eif5b        | eukaryotic translation initiation factor 5B                                                                                                                                                                                                                                                                                         |
| ela1         | elastase 1, pancreatic                                                                                                                                                                                                                                                                                                              |
| elmo1        | engulfment and cell motility 1, ced-12 homolog (C. elegans)                                                                                                                                                                                                                                                                         |
| elmo2        | engulfment and cell motility 2, ced-12 homolog (C. elegans)                                                                                                                                                                                                                                                                         |
| elmo3        | engulfment and cell motility 3, ced-12 homolog (C. elegans)                                                                                                                                                                                                                                                                         |
| elmod1       | ELMO domain containing 1                                                                                                                                                                                                                                                                                                            |
| elmod2       | ELMO domain containing 2                                                                                                                                                                                                                                                                                                            |
| elp2         | elongation protein 2 homolog (S. cerevisiae)                                                                                                                                                                                                                                                                                        |
| emb-rs4      | embigin related sequence 4                                                                                                                                                                                                                                                                                                          |
| emid2        | EMI domain containing 2                                                                                                                                                                                                                                                                                                             |
| emilin3      | elastin microfibril interfacier 3                                                                                                                                                                                                                                                                                                   |
| eml2         | echinoderm microtubule associated protein like 2                                                                                                                                                                                                                                                                                    |

|                    |                                                                                                                                             |
|--------------------|---------------------------------------------------------------------------------------------------------------------------------------------|
| eml3               | echinoderm microtubule associated protein like 3                                                                                            |
| emv22              | endogenous ecotropic MuLV 22                                                                                                                |
| emv24              | endogenous ecotropic MuLV 24                                                                                                                |
| emv27              | endogenous ecotropic MuLV 27                                                                                                                |
| eno3               | enolase 3, beta muscle                                                                                                                      |
| ensa               | predicted gene 5224; endosulfine alpha; similar to endosulfine alpha isoform 1                                                              |
| ensmusg00000053178 | predicted gene 9897                                                                                                                         |
| ensmusg00000061310 | predicted gene, ENSMUSG00000061310                                                                                                          |
| ensmusg00000067748 | ribosomal protein L17, pseudogene 5                                                                                                         |
| ensmusg00000076783 | T-cell receptor alpha, variable 8                                                                                                           |
| entpd6             | ectonucleoside triphosphate diphosphohydrolase 6                                                                                            |
| entpd7             | ectonucleoside triphosphate diphosphohydrolase 7                                                                                            |
| epb4.114a          | erythrocyte protein band 4.1-like 4a                                                                                                        |
| epb4.114b          | erythrocyte protein band 4.1-like 4b                                                                                                        |
| eps8               | epidermal growth factor receptor pathway substrate 8                                                                                        |
| eps8l1             | EPS8-like 1                                                                                                                                 |
| eps8l2             | EPS8-like 2                                                                                                                                 |
| eps8l3             | EPS8-like 3                                                                                                                                 |
| eral1              | Era (G-protein)-like 1 (E. coli)                                                                                                            |
| erc1               | ELKS/RAB6-interacting/CAST family member 1; similar to Rab6-interacting protein 2                                                           |
| erdr1              | erythroid differentiation regulator 1                                                                                                       |
| esrrg              | estrogen-related receptor gamma                                                                                                             |
| etaa1              | Ewing's tumor-associated antigen 1                                                                                                          |
| etf1               | eukaryotic translation termination factor 1                                                                                                 |
| etfa               | predicted gene 2893; electron transferring flavoprotein, alpha polypeptide                                                                  |
| etfb               | similar to Electron transferring flavoprotein, beta polypeptide; electron transferring flavoprotein, beta polypeptide                       |
| etn1               | early transposon element 1                                                                                                                  |
| etv2               | similar to ETS related protein 71; ets variant gene 2                                                                                       |
| evi5l              | ecotropic viral integration site 5 like                                                                                                     |
| exoc1              | exocyst complex component 1                                                                                                                 |
| exoc2              | exocyst complex component 2                                                                                                                 |
| exoc3              | exocyst complex component 3                                                                                                                 |
| exoc5              | exocyst complex component 5                                                                                                                 |
| exoc6b             | exocyst complex component 6B                                                                                                                |
| exoc7              | exocyst complex component 7                                                                                                                 |
| exoc8              | exocyst complex component 8                                                                                                                 |
| exosc8             | exosome component 8                                                                                                                         |
| f13b               | coagulation factor XIII, beta subunit                                                                                                       |
| f830045p16rik      | RIKEN cDNA F830045P16 gene                                                                                                                  |
| f830116e18rik      | RIKEN cDNA F830116E18 gene                                                                                                                  |
| farf1              | FERM, RhoGEF (Arhgef) and pleckstrin domain protein 1 (chondrocyte-derived); similar to FERMRhoGEF (Arhgef) and pleckstrin domain protein 1 |
| farf2              | FERM, RhoGEF and pleckstrin domain protein 2                                                                                                |
| fars2              | phenylalanine-tRNA synthetase 2 (mitochondrial)                                                                                             |
| farsa              | phenylalanyl-tRNA synthetase, alpha subunit                                                                                                 |
| farsb              | phenylalanyl-tRNA synthetase, beta subunit                                                                                                  |
| fbxo10             | F-box protein 10                                                                                                                            |
| fbxo16             | F-box protein 16                                                                                                                            |
| fbxo17             | F-box protein 17; hypothetical protein LOC100047462                                                                                         |
| fbxo27             | F-box protein 27                                                                                                                            |
| fbxo44             | similar to F-box protein 44; F-box protein 44                                                                                               |
| fbxo8              | F-box protein 8                                                                                                                             |

|          |                                                                                                                                                                      |
|----------|----------------------------------------------------------------------------------------------------------------------------------------------------------------------|
| fbxw15   | F-box and WD-40 domain protein 15                                                                                                                                    |
| fcgr1a   | Fc receptor, IgE, high affinity I, alpha polypeptide                                                                                                                 |
| fcho2    | FCH domain only 2                                                                                                                                                    |
| fdpsl8   | farnesyl diphosphate synthetase-like 8                                                                                                                               |
| fer1l4   | fer-1-like 4 ( <i>C. elegans</i> )                                                                                                                                   |
| fermt3   | fermitin family homolog 3 ( <i>Drosophila</i> )                                                                                                                      |
| fgd1     | FYVE, RhoGEF and PH domain containing 1                                                                                                                              |
| fgd2     | FYVE, RhoGEF and PH domain containing 2                                                                                                                              |
| fgd3     | FYVE, RhoGEF and PH domain containing 3                                                                                                                              |
| fgd4     | FYVE, RhoGEF and PH domain containing 4                                                                                                                              |
| fgfr1op2 | FGFR1 oncogene partner 2; similar to FGFR1 oncogene partner 2; predicted gene 12312                                                                                  |
| fgg      | fibrinogen gamma chain                                                                                                                                               |
| ficd     | FIC domain containing                                                                                                                                                |
| fkbp2    | FK506 binding protein 2                                                                                                                                              |
| fkbp9    | FK506 binding protein 9                                                                                                                                              |
| fnbp1    | formin binding protein 1                                                                                                                                             |
| fncl1    | fibronectin type III domain containing 1; similar to fibronectin type III domain containing 1                                                                        |
| fncl4    | fibronectin type III domain containing 4                                                                                                                             |
| fncl5    | fibronectin type III domain containing 5                                                                                                                             |
| fnta     | farnesyltransferase, CAAX box, alpha; similar to farnesyltransferase alpha subunit                                                                                   |
| fntb     | similar to farnesyltransferase, CAAX box, beta; farnesyltransferase, CAAX box, beta                                                                                  |
| foxa3    | forkhead box A3                                                                                                                                                      |
| fpgt     | fucose-1-phosphate guanylyltransferase                                                                                                                               |
| frag1    | post-GPI attachment to proteins 2                                                                                                                                    |
| frmd4b   | FERM domain containing 4B                                                                                                                                            |
| frmpd1   | FERM and PDZ domain containing 1                                                                                                                                     |
| fsd1l    | fibronectin type III and SPRY domain containing 1-like                                                                                                               |
| ftsj2    | FtsJ homolog 2 ( <i>E. coli</i> )                                                                                                                                    |
| fuk      | fucokinase                                                                                                                                                           |
| fut4-ps1 | fucosyltransferase 4, pseudogene 1                                                                                                                                   |
| fxc1     | fractured callus expressed transcript 1; dynein heavy chain domain 1                                                                                                 |
| fxyd1    | FXYD domain-containing ion transport regulator 1                                                                                                                     |
| fxyd2    | FXYD domain-containing ion transport regulator 2                                                                                                                     |
| fxyd3    | FXYD domain-containing ion transport regulator 3                                                                                                                     |
| fxyd4    | FXYD domain-containing ion transport regulator 4                                                                                                                     |
| fxyd7    | FXYD domain-containing ion transport regulator 7                                                                                                                     |
| g0s2     | G0/G1 switch gene 2                                                                                                                                                  |
| gabrap   | gamma-aminobutyric acid receptor associated protein                                                                                                                  |
| gabrapl1 | gamma-aminobutyric acid (GABA) A receptor-associated protein-like 1                                                                                                  |
| gabrapl2 | gamma-aminobutyric acid (GABA) A receptor-associated protein-like 2; predicted gene 3724                                                                             |
| gabpa    | GA repeat binding protein, alpha                                                                                                                                     |
| gabpb1   | GA repeat binding protein, beta 1                                                                                                                                    |
| gabra1   | gamma-aminobutyric acid (GABA) A receptor, subunit alpha 1                                                                                                           |
| gabra2   | gamma-aminobutyric acid (GABA) A receptor, subunit alpha 2; similar to Gamma-aminobutyric-acid receptor subunit alpha-2 precursor (GABA(A) receptor subunit alpha-2) |
| gabra3   | gamma-aminobutyric acid (GABA) A receptor, subunit alpha 3                                                                                                           |
| gabra4   | gamma-aminobutyric acid (GABA) A receptor, subunit alpha 4                                                                                                           |
| gabra5   | gamma-aminobutyric acid (GABA) A receptor, subunit alpha 5                                                                                                           |
| gabra6   | gamma-aminobutyric acid (GABA) A receptor, subunit alpha 6                                                                                                           |
| gabrb1   | gamma-aminobutyric acid (GABA) A receptor, subunit beta 1                                                                                                            |
| gabrb2   | gamma-aminobutyric acid (GABA) A receptor, subunit beta 2                                                                                                            |
| gabrb3   | gamma-aminobutyric acid (GABA) A receptor, subunit beta 3                                                                                                            |
| gabrd    | gamma-aminobutyric acid (GABA) A receptor, subunit delta                                                                                                             |
| gabre    | similar to gamma-aminobutyric acid (GABA-A) receptor, subunit epsilon; gamma-aminobutyric acid (GABA) A receptor, subunit epsilon                                    |

|         |                                                                                      |
|---------|--------------------------------------------------------------------------------------|
| gabrg1  | gamma-aminobutyric acid (GABA) A receptor, subunit gamma 1                           |
| gabrg2  | gamma-aminobutyric acid (GABA) A receptor, subunit gamma 2                           |
| gabrg3  | gamma-aminobutyric acid (GABA) A receptor, subunit gamma 3                           |
| gabrp   | gamma-aminobutyric acid (GABA) A receptor, pi                                        |
| gabrq   | gamma-aminobutyric acid (GABA) A receptor, subunit theta                             |
| gabrr1  | gamma-aminobutyric acid (GABA) C receptor, subunit rho 1                             |
| gabrr2  | gamma-aminobutyric acid (GABA) C receptor, subunit rho 2                             |
| gabrr3  | gamma-aminobutyric acid (GABA) receptor, rho 3                                       |
| gal3st2 | predicted gene 9994; galactose-3-O-sulfotransferase 2                                |
| gal3st3 | galactose-3-O-sulfotransferase 3                                                     |
| gal3st4 | galactose-3-O-sulfotransferase 4                                                     |
| ganab   | alpha glucosidase 2 alpha neutral subunit                                            |
| gapvd1  | GTPase activating protein and VPS9 domains 1                                         |
| garnl1  | Ral GTPase activating protein, alpha subunit 1                                       |
| garnl4  | RAP1 GTPase activating protein 2                                                     |
| gas2l1  | growth arrest-specific 2 like 1                                                      |
| gas2l2  | growth arrest-specific 2 like 2                                                      |
| gas4    | growth arrest specific 4                                                             |
| gatad1  | GATA zinc finger domain containing 1                                                 |
| gbas    | glioblastoma amplified sequence                                                      |
| gbf1    | golgi-specific brefeldin A-resistance factor 1                                       |
| gbp1    | similar to guanylate nucleotide binding protein 1; guanylate binding protein 1       |
| gbp2    | guanylate binding protein 2                                                          |
| gbp3    | guanylate binding protein 3                                                          |
| gbp4    | guanylate binding protein 4                                                          |
| gbp5    | guanylate binding protein 5                                                          |
| gcc1    | golgi coiled coil 1                                                                  |
| gcc2    | GRIP and coiled-coil domain containing 2                                             |
| gda     | guanine deaminase                                                                    |
| gde1    | glycerophosphodiester phosphodiesterase 1                                            |
| gdi1    | guanosine diphosphate (GDP) dissociation inhibitor 1                                 |
| gdi2    | predicted gene 4973; guanosine diphosphate (GDP) dissociation inhibitor 2            |
| gdpd1   | glycerophosphodiester phosphodiesterase domain containing 1                          |
| gdpd4   | glycerophosphodiester phosphodiesterase domain containing 4                          |
| gem     | GTP binding protein (gene overexpressed in skeletal muscle)                          |
| gfm1    | G elongation factor, mitochondrial 1                                                 |
| ggnbp1  | gametogenetin binding protein 1; RIKEN cDNA 0610031G08 gene                          |
| ggnbp2  | gametogenetin binding protein 2                                                      |
| ggps1   | geranylgeranyl diphosphate synthase 1; similar to Ggps1 protein; predicted gene 5630 |
| ggt7    | gamma-glutamyltransferase 7                                                          |
| ggta1   | glycoprotein galactosyltransferase alpha 1, 3                                        |
| gimap1  | GTPase, IMAP family member 1                                                         |
| gimap3  | similar to immunity-associated nucleotide 4; GTPase, IMAP family member 3            |
| gimap4  | GTPase, IMAP family member 4                                                         |
| gimap6  | GTPase, IMAP family member 6                                                         |
| gimap7  | GTPase, IMAP family member 7                                                         |
| gimap8  | GTPase, IMAP family member 8                                                         |
| gimap9  | GTPase, IMAP family member 9                                                         |
| gins4   | GINS complex subunit 4 (Sld5 homolog)                                                |
| gipc2   | GIPC PDZ domain containing family, member 2                                          |
| gipc3   | GIPC PDZ domain containing family, member 3                                          |
| git1    | G protein-coupled receptor kinase-interactor 1                                       |
| git2    | G protein-coupled receptor kinase-interactor 2                                       |
| gja6    | gap junction protein, alpha 6                                                        |
| glipr2  | GLI pathogenesis-related 2                                                           |

|          |                                                                                                                                                                                                                                                                                                                                                 |
|----------|-------------------------------------------------------------------------------------------------------------------------------------------------------------------------------------------------------------------------------------------------------------------------------------------------------------------------------------------------|
| glod4    | glyoxalase domain containing 4                                                                                                                                                                                                                                                                                                                  |
| glra2    | glycine receptor, alpha 2 subunit                                                                                                                                                                                                                                                                                                               |
| glra3    | glycine receptor, alpha 3 subunit                                                                                                                                                                                                                                                                                                               |
| glra4    | glycine receptor, alpha 4 subunit                                                                                                                                                                                                                                                                                                               |
| glrb     | glycine receptor, beta subunit                                                                                                                                                                                                                                                                                                                  |
| glt25d1  | glycosyltransferase 25 domain containing 1                                                                                                                                                                                                                                                                                                      |
| glt25d2  | glycosyltransferase 25 domain containing 2                                                                                                                                                                                                                                                                                                      |
| gm1110   | predicted gene 1110                                                                                                                                                                                                                                                                                                                             |
| gm1220   | gene model 1220, (NCBI)                                                                                                                                                                                                                                                                                                                         |
| gm1423   | gene model 1423, (NCBI)                                                                                                                                                                                                                                                                                                                         |
| gm1848   | predicted gene 1848                                                                                                                                                                                                                                                                                                                             |
| gm312    | keratin associated protein 24-1                                                                                                                                                                                                                                                                                                                 |
| gm347    | predicted gene 347                                                                                                                                                                                                                                                                                                                              |
| gm459    | predicted gene 459                                                                                                                                                                                                                                                                                                                              |
| gm75     | epididymal protein 3B                                                                                                                                                                                                                                                                                                                           |
| gm885    | predicted gene 885                                                                                                                                                                                                                                                                                                                              |
| gm900    | predicted gene 5353; immunoglobulin heavy chain (J558 family); similar to Ig heavy chain V region 108A precursor; similar to Ig heavy chain V-I region V35 precursor; predicted gene 900; immunoglobulin heavy chain complex; similar to Ig H-chain V-JH1-region; immunoglobulin heavy variable V1-31; immunoglobulin heavy chain 2 (serum IgA) |
| gm98     | predicted gene 98                                                                                                                                                                                                                                                                                                                               |
| gmip     | Gem-interacting protein                                                                                                                                                                                                                                                                                                                         |
| gmppa    | GDP-mannose pyrophosphorylase A                                                                                                                                                                                                                                                                                                                 |
| gmppb    | GDP-mannose pyrophosphorylase B                                                                                                                                                                                                                                                                                                                 |
| gmpr     | guanosine monophosphate reductase                                                                                                                                                                                                                                                                                                               |
| gna11    | guanine nucleotide binding protein, alpha 11                                                                                                                                                                                                                                                                                                    |
| gna12    | guanine nucleotide binding protein, alpha 12; similar to Guanine nucleotide-binding protein alpha-12 subunit (G alpha-12)                                                                                                                                                                                                                       |
| gna13    | guanine nucleotide binding protein, alpha 13                                                                                                                                                                                                                                                                                                    |
| gna14    | guanine nucleotide binding protein, alpha 14                                                                                                                                                                                                                                                                                                    |
| gna15    | guanine nucleotide binding protein, alpha 15                                                                                                                                                                                                                                                                                                    |
| gnai1    | guanine nucleotide binding protein (G protein), alpha inhibiting 1                                                                                                                                                                                                                                                                              |
| gnai2    | guanine nucleotide binding protein (G protein), alpha inhibiting 2; similar to Guanine nucleotide-binding protein G(i), alpha-2 subunit (Adenylate cyclase-inhibiting G alpha protein)                                                                                                                                                          |
| gnai3    | guanine nucleotide binding protein (G protein), alpha inhibiting 3                                                                                                                                                                                                                                                                              |
| gnal     | guanine nucleotide binding protein, alpha stimulating, olfactory type                                                                                                                                                                                                                                                                           |
| gnao1    | guanine nucleotide binding protein, alpha O                                                                                                                                                                                                                                                                                                     |
| gna-rs1  | guanine nucleotide binding protein-like 1                                                                                                                                                                                                                                                                                                       |
| gnat2    | guanine nucleotide binding protein, alpha transducing 2                                                                                                                                                                                                                                                                                         |
| gnaz     | guanine nucleotide binding protein, alpha z subunit                                                                                                                                                                                                                                                                                             |
| gnb1     | guanine nucleotide binding protein (G protein), beta 1                                                                                                                                                                                                                                                                                          |
| gnb1-ps2 | guanine nucleotide binding protein (G protein), beta 1, pseudogene 2                                                                                                                                                                                                                                                                            |
| gnb1-ps3 | guanine nucleotide binding protein (G protein), beta 1, pseudogene 3                                                                                                                                                                                                                                                                            |
| gnb2     | guanine nucleotide binding protein (G protein), beta 2                                                                                                                                                                                                                                                                                          |
| gnb2l1   | guanine nucleotide binding protein (G protein), beta polypeptide 2 like 1                                                                                                                                                                                                                                                                       |
| gnb4     | guanine nucleotide binding protein (G protein), beta 4                                                                                                                                                                                                                                                                                          |
| gnb5     | guanine nucleotide binding protein (G protein), beta 5                                                                                                                                                                                                                                                                                          |
| gng10    | guanine nucleotide binding protein (G protein), gamma 10                                                                                                                                                                                                                                                                                        |
| gng11    | guanine nucleotide binding protein (G protein), gamma 11                                                                                                                                                                                                                                                                                        |
| gng12    | guanine nucleotide binding protein (G protein), gamma 12                                                                                                                                                                                                                                                                                        |
| gng13    | guanine nucleotide binding protein (G protein), gamma 13                                                                                                                                                                                                                                                                                        |
| gng2     | guanine nucleotide binding protein (G protein), gamma 2                                                                                                                                                                                                                                                                                         |
| gng3     | guanine nucleotide binding protein (G protein), gamma 3                                                                                                                                                                                                                                                                                         |
| gng4     | guanine nucleotide binding protein (G protein), gamma 4                                                                                                                                                                                                                                                                                         |
| gng5     | predicted gene 13342; predicted gene 3785; predicted gene 15776; predicted gene 6825; similar to G protein gamma-5 subunit; predicted gene 3150; predicted gene 4356; guanine nucleotide binding protein (G protein), gamma 5                                                                                                                   |

|            |                                                                                                                             |
|------------|-----------------------------------------------------------------------------------------------------------------------------|
| gng7       | guanine nucleotide binding protein (G protein), gamma 7                                                                     |
| gng8       | guanine nucleotide binding protein (G protein), gamma 8                                                                     |
| gngt1      | guanine nucleotide binding protein (G protein), gamma transducing activity polypeptide 1                                    |
| gngt2      | guanine nucleotide binding protein (G protein), gamma transducing activity polypeptide 2                                    |
| gnl2       | guanine nucleotide binding protein-like 2 (nucleolar)                                                                       |
| gnl3l      | guanine nucleotide binding protein-like 3 (nucleolar)-like                                                                  |
| gnptab     | N-acetylglucosamine-1-phosphate transferase, alpha and beta subunits                                                        |
| gnptg      | similar to N-acetylglucosamine-1-phosphotransferase, gamma subunit; N-acetylglucosamine-1-phosphotransferase, gamma subunit |
| golga4     | golgi autoantigen, golgin subfamily a, 4                                                                                    |
| golga5     | golgi autoantigen, golgin subfamily a, 5                                                                                    |
| golga7     | predicted gene 6829; golgi autoantigen, golgin subfamily a, 7                                                               |
| golgb1     | golgi autoantigen, golgin subfamily b, macrogolgin 1                                                                        |
| golt1b     | golgi transport 1 homolog B ( <i>S. cerevisiae</i> )                                                                        |
| gorasp2    | golgi reassembly stacking protein 2                                                                                         |
| got1l1     | glutamic-oxaloacetic transaminase 1-like 1                                                                                  |
| gpha2      | glycoprotein hormone alpha 2                                                                                                |
| gphb5      | glycoprotein hormone beta 5                                                                                                 |
| gphn       | gephyrin                                                                                                                    |
| gpr107     | G protein-coupled receptor 107; hypothetical protein LOC100047589                                                           |
| gpr108     | G protein-coupled receptor 108                                                                                              |
| gpr111     | G protein-coupled receptor 111                                                                                              |
| gpr113     | G protein-coupled receptor 113                                                                                              |
| gpr123     | G protein-coupled receptor 123                                                                                              |
| gpr128     | G protein-coupled receptor 128                                                                                              |
| gpr137b-ps | G protein-coupled receptor 137B, pseudogene                                                                                 |
| gpr142     | G protein-coupled receptor 142                                                                                              |
| gpr156     | G protein-coupled receptor 156                                                                                              |
| gpr160     | G protein-coupled receptor 160                                                                                              |
| gpr173     | G-protein coupled receptor 173                                                                                              |
| gpr176     | G protein-coupled receptor 176                                                                                              |
| gpr177     | G protein-coupled receptor 177                                                                                              |
| gpr20      | G protein-coupled receptor 20                                                                                               |
| gpr26      | G protein-coupled receptor 26                                                                                               |
| gpr27      | G protein-coupled receptor 27                                                                                               |
| gpr3       | G-protein coupled receptor 3                                                                                                |
| gpr31c     | predicted gene 8593; predicted gene 6553; predicted gene 6544; G protein-coupled receptor 31, D17Leh66c region              |
| gpr45      | G protein-coupled receptor 45                                                                                               |
| gpr6       | G protein-coupled receptor 6                                                                                                |
| gpr63      | G protein-coupled receptor 63                                                                                               |
| gprin1     | G protein-regulated inducer of neurite outgrowth 1                                                                          |
| gprin2     | G protein regulated inducer of neurite outgrowth 2                                                                          |
| gprin3     | GPRIN family member 3                                                                                                       |
| gpsm1      | G-protein signalling modulator 1 (AGS3-like, <i>C. elegans</i> )                                                            |
| gpsm2      | G-protein signalling modulator 2 (AGS3-like, <i>C. elegans</i> )                                                            |
| gpsm3      | G-protein signalling modulator 3 (AGS3-like, <i>C. elegans</i> )                                                            |
| grasp      | GRP1 (general receptor for phosphoinositides 1)-associated scaffold protein                                                 |
| grit       | Rho GTPase activating protein 32                                                                                            |
| grlf1      | glucocorticoid receptor DNA binding factor 1                                                                                |
| grtp1      | GH regulated TBC protein 1                                                                                                  |
| grwd1      | glutamate-rich WD repeat containing 1                                                                                       |
| gsdma1     | gasdermin A                                                                                                                 |
| gsdmc2     | gasdermin C2                                                                                                                |
| gsdmc3     | gasdermin C3                                                                                                                |



|         |                                                                                                                                                                                                                                                                                                                                  |
|---------|----------------------------------------------------------------------------------------------------------------------------------------------------------------------------------------------------------------------------------------------------------------------------------------------------------------------------------|
| gsdmc4  | gasdermin C4                                                                                                                                                                                                                                                                                                                     |
| gsg1    | germ cell-specific gene 1                                                                                                                                                                                                                                                                                                        |
| gspt2   | G1 to S phase transition 2                                                                                                                                                                                                                                                                                                       |
| gsta    | glutathione S-transferase cluster                                                                                                                                                                                                                                                                                                |
| gsta1   | glutathione S-transferase, alpha 1 (Ya)                                                                                                                                                                                                                                                                                          |
| gsta2   | glutathione S-transferase, alpha 2 (Yc2)                                                                                                                                                                                                                                                                                         |
| gsta3   | glutathione S-transferase, alpha 3                                                                                                                                                                                                                                                                                               |
| gtdc1   | glycosyltransferase-like domain containing 1                                                                                                                                                                                                                                                                                     |
| gtf2a1  | predicted gene 5435; general transcription factor II A, 1                                                                                                                                                                                                                                                                        |
| gtf2a1l | general transcription factor IIA, 1-like                                                                                                                                                                                                                                                                                         |
| gtf2a2  | similar to TFIIA small subunit; general transcription factor II A, 2                                                                                                                                                                                                                                                             |
| gtf3c1  | general transcription factor III C 1                                                                                                                                                                                                                                                                                             |
| gtf3c2  | general transcription factor IIIC, polypeptide 2, beta; Mpv17 transgene, kidney disease mutant                                                                                                                                                                                                                                   |
| gtf3c3  | general transcription factor IIIC, polypeptide 3                                                                                                                                                                                                                                                                                 |
| gtf3c6  | general transcription factor IIIC, polypeptide 6, alpha                                                                                                                                                                                                                                                                          |
| gtbpb1  | GTP binding protein 1                                                                                                                                                                                                                                                                                                            |
| gtbpb10 | GTP-binding protein 10 (putative); predicted gene 6877                                                                                                                                                                                                                                                                           |
| gtbpb2  | GTP binding protein 2                                                                                                                                                                                                                                                                                                            |
| gtbpb3  | GTP binding protein 3                                                                                                                                                                                                                                                                                                            |
| gtbpb4  | GTP binding protein 4                                                                                                                                                                                                                                                                                                            |
| gtbpb5  | GTP binding protein 5                                                                                                                                                                                                                                                                                                            |
| gtsf1l  | zinc finger protein 850; gametocyte specific factor 1-like                                                                                                                                                                                                                                                                       |
| gucy1a2 | hypothetical protein LOC100044212; guanylate cyclase 1, soluble, alpha 2                                                                                                                                                                                                                                                         |
| gucy1a3 | guanylate cyclase 1, soluble, alpha 3                                                                                                                                                                                                                                                                                            |
| gucy1b2 | similar to guanylate cyclase 1, soluble, beta 2; guanylate cyclase 1, soluble, beta 2                                                                                                                                                                                                                                            |
| gucy1b3 | guanylate cyclase 1, soluble, beta 3                                                                                                                                                                                                                                                                                             |
| guf1    | GUF1 GTPase homolog (S. cerevisiae)                                                                                                                                                                                                                                                                                              |
| gvin1   | predicted gene 1966; predicted gene 8995; GTPase, very large interferon inducible 1                                                                                                                                                                                                                                              |
| gykl1   | glycerol kinase-like 1                                                                                                                                                                                                                                                                                                           |
| h2-dmb2 | histocompatibility 2, class II, locus Mb2                                                                                                                                                                                                                                                                                        |
| h2-eb2  | histocompatibility 2, class II antigen E beta2                                                                                                                                                                                                                                                                                   |
| h2-gs10 | MHC class I like protein GS10                                                                                                                                                                                                                                                                                                    |
| h2-k2   | histocompatibility 2, K region locus 2                                                                                                                                                                                                                                                                                           |
| h2-m2   | histocompatibility 2, M region locus 2                                                                                                                                                                                                                                                                                           |
| h2-ob   | histocompatibility 2, O region beta locus                                                                                                                                                                                                                                                                                        |
| h2-pb   | histocompatibility 2, P region beta locus                                                                                                                                                                                                                                                                                        |
| h2-q11  | histocompatibility 2, Q region locus 11                                                                                                                                                                                                                                                                                          |
| h2-q5   | histocompatibility 2, Q region locus 5                                                                                                                                                                                                                                                                                           |
| h2-t10  | histocompatibility 2, T region locus 9; hypothetical protein LOC100044191; histocompatibility 2, T region locus 10; hypothetical protein LOC100044190; histocompatibility 2, T region locus 22                                                                                                                                   |
| h2-t18  | MHC class I antigen; histocompatibility 2, T region locus 18; hypothetical protein LOC100044192; histocompatibility 2, T region locus 3; similar to histocompatibility 2, T region locus 3; similar to H-2 class I histocompatibility antigen, TLA(C) alpha chain precursor                                                      |
| h2-t22  | histocompatibility 2, T region locus 9; hypothetical protein LOC100044191; histocompatibility 2, T region locus 10; hypothetical protein LOC100044190; histocompatibility 2, T region locus 22                                                                                                                                   |
| h2-t3   | MHC class I antigen; histocompatibility 2, T region locus 18; hypothetical protein LOC100044192; histocompatibility 2, T region locus 3; similar to histocompatibility 2, T region locus 3; similar to H-2 class I histocompatibility antigen, TLA(C) alpha chain precursor                                                      |
| h2-t9   | histocompatibility 2, T region locus 9; hypothetical protein LOC100044191; histocompatibility 2, T region locus 10; hypothetical protein LOC100044190; histocompatibility 2, T region locus 22                                                                                                                                   |
| h36     | histocompatibility 36                                                                                                                                                                                                                                                                                                            |
| h8      | histocompatibility 8                                                                                                                                                                                                                                                                                                             |
| hadha   | hydroxyacyl-Coenzyme A dehydrogenase/3-ketoacyl-Coenzyme A thiolase/enoyl-Coenzyme A hydratase (trifunctional protein), alpha subunit                                                                                                                                                                                            |
| hadhb   | predicted gene 13910; similar to Hydroxyacyl-Coenzyme A dehydrogenase/3-ketoacyl-Coenzyme A thiolase/enoyl-Coenzyme A hydratase (trifunctional protein), beta subunit; hydroxyacyl-Coenzyme A dehydrogenase/3-ketoacyl-Coenzyme A thiolase/enoyl-Coenzyme A hydratase (trifunctional protein), beta subunit; predicted gene 9108 |

|            |                                                                                                              |
|------------|--------------------------------------------------------------------------------------------------------------|
| harbi1     | harbinger transposase derived 1                                                                              |
| hba-ps3    | hemoglobin alpha, pseudogene 3                                                                               |
| hba-x      | hemoglobin X, alpha-like embryonic chain in Hba complex                                                      |
| hbb-b2     | hemoglobin, beta adult major chain; hemoglobin, beta adult minor chain                                       |
| hbb-bh0    | hemoglobin Z, beta-like embryonic chain; hypothetical protein LOC100044263; hemoglobin, beta, pseudogene bh0 |
| hbb-bh1    | hemoglobin Z, beta-like embryonic chain; hypothetical protein LOC100044263; hemoglobin, beta, pseudogene bh0 |
| hbb-bh2    | hemoglobin beta, pseudogene bh2                                                                              |
| hbb-bh3    | hemoglobin beta, pseudogene bh3                                                                              |
| hbb-y      | similar to beta-globin; hemoglobin Y, beta-like embryonic chain                                              |
| hbq1       | hemoglobin, theta 1                                                                                          |
| hc11       | heterochromatin, Chr 11                                                                                      |
| hc8        | heterochromatin, Chr 8                                                                                       |
| hcm        | heterochromatin, multiple chromosomes                                                                        |
| hdgfl1     | hepatoma derived growth factor-like 1                                                                        |
| hebp2      | heme binding protein 2                                                                                       |
| hel308     | helicase, POLQ-like                                                                                          |
| helb       | helicase (DNA) B                                                                                             |
| helz       | helicase with zinc finger domain                                                                             |
| herc1      | hect (homologous to the E6-AP (UBE3A) carboxyl terminus) domain and RCC1 (CHC1)-like domain (RLD) 1          |
| herc3      | hect domain and RLD 3                                                                                        |
| herc5      | hect domain and RLD 5                                                                                        |
| hfm1       | HFM1, ATP-dependent DNA helicase homolog ( <i>S. cerevisiae</i> )                                            |
| hhat       | hedgehog acyltransferase                                                                                     |
| hhatl      | hedgehog acyltransferase-like                                                                                |
| higd1a     | HIG1 domain family, member 1A                                                                                |
| hint1      | histidine triad nucleotide binding protein 1                                                                 |
| hint3      | histidine triad nucleotide binding protein 3                                                                 |
| hist1h2aj  | histone cluster 1, H2aj                                                                                      |
| hist3h2ba  | histone cluster 3, H2ba; histone cluster 3, H2bb                                                             |
| hivep1     | human immunodeficiency virus type I enhancer binding protein 1                                               |
| hnga2-ps1  | high mobility group AT-hook 2, pseudogene 1                                                                  |
| hmgn1-rs15 | high mobility group nucleosomal binding domain 1, related sequence 15                                        |
| hmgn1-rs5  | high mobility group nucleosomal binding domain 1, related sequence 5                                         |
| hmgn2-rs2  | high mobility group nucleosomal binding domain 2, related sequence 2                                         |
| hn1l       | hematological and neurological expressed 1-like                                                              |
| hnf4g      | hepatocyte nuclear factor 4, gamma                                                                           |
| hnrrp12    | heterogeneous nuclear ribonucleoprotein U-like 2                                                             |
| homez      | homeodomain leucine zipper-encoding gene                                                                     |
| hormad1    | HORMA domain containing 1; predicted gene 7167                                                               |
| hras1-ps1  | Harvey rat sarcoma virus oncogene, pseudogene 1                                                              |
| hrasls     | HRAS-like suppressor                                                                                         |
| hscb       | HscB iron-sulfur cluster co-chaperone homolog ( <i>E. coli</i> )                                             |
| hsd3b2     | hydroxy-delta-5-steroid dehydrogenase, 3 beta- and steroid delta-isomerase 2                                 |
| hsd3b3     | hydroxy-delta-5-steroid dehydrogenase, 3 beta- and steroid delta-isomerase 3                                 |
| hsd3b5     | hydroxy-delta-5-steroid dehydrogenase, 3 beta- and steroid delta-isomerase 5                                 |
| hsd1l      | hydroxysteroid dehydrogenase like 1                                                                          |
| hsd12      | hydroxysteroid dehydrogenase like 2                                                                          |
| hsfy2      | heat shock transcription factor, Y linked 2                                                                  |
| hspa9-ps1  | heat shock protein 9, pseudogene 1                                                                           |
| hspbap1    | Hspb associated protein 1                                                                                    |
| htr1e      | 5-hydroxytryptamine (serotonin) receptor 1E                                                                  |
| htr5b      | 5-hydroxytryptamine (serotonin) receptor 5B                                                                  |
| iapls3-28  | intracisternal A particle, lymphocyte specific 3-28                                                          |

|           |                                                                                                                                                                                                                                                                                                                                                 |
|-----------|-------------------------------------------------------------------------------------------------------------------------------------------------------------------------------------------------------------------------------------------------------------------------------------------------------------------------------------------------|
| iapt15    | intracisternal A particle, tumor specific 15                                                                                                                                                                                                                                                                                                    |
| iapt8     | intracisternal A particle, tumor specific 8                                                                                                                                                                                                                                                                                                     |
| icam4     | intercellular adhesion molecule 4, Landsteiner-Wiener blood group                                                                                                                                                                                                                                                                               |
| ichs      | immediate cutaneous hypersensitivity QTL                                                                                                                                                                                                                                                                                                        |
| icmt      | isoprenylcysteine carboxyl methyltransferase                                                                                                                                                                                                                                                                                                    |
| idh3a     | isocitrate dehydrogenase 3 (NAD+) alpha                                                                                                                                                                                                                                                                                                         |
| idh3b     | isocitrate dehydrogenase 3 (NAD+) beta                                                                                                                                                                                                                                                                                                          |
| idh3g     | isocitrate dehydrogenase 3 (NAD+), gamma                                                                                                                                                                                                                                                                                                        |
| ier3ip1   | immediate early response 3 interacting protein 1; haloacid dehalogenase-like hydrolase domain containing 2; predicted gene 10784                                                                                                                                                                                                                |
| if1       | NDV-induced circulating interferon                                                                                                                                                                                                                                                                                                              |
| if3       | Sendai virus induced interferon 3                                                                                                                                                                                                                                                                                                               |
| ifi201    | interferon activated gene 201                                                                                                                                                                                                                                                                                                                   |
| ifna1     | interferon alpha 1                                                                                                                                                                                                                                                                                                                              |
| ifna10    | interferon alpha 10                                                                                                                                                                                                                                                                                                                             |
| ifna11    | interferon alpha 11; hypothetical protein LOC100044216                                                                                                                                                                                                                                                                                          |
| ifna2     | interferon alpha 2                                                                                                                                                                                                                                                                                                                              |
| ifna3     | interferon alpha 3                                                                                                                                                                                                                                                                                                                              |
| ifna4     | interferon alpha 4                                                                                                                                                                                                                                                                                                                              |
| ifna5     | interferon alpha 5                                                                                                                                                                                                                                                                                                                              |
| ifna6     | interferon alpha 6                                                                                                                                                                                                                                                                                                                              |
| ifna7     | interferon alpha 7                                                                                                                                                                                                                                                                                                                              |
| ifna9     | interferon alpha 9                                                                                                                                                                                                                                                                                                                              |
| ifnab     | interferon alpha B                                                                                                                                                                                                                                                                                                                              |
| ifna-ps1  | interferon alpha gene, pseudogene 1                                                                                                                                                                                                                                                                                                             |
| ifnar2    | interferon (alpha and beta) receptor 2                                                                                                                                                                                                                                                                                                          |
| ifngr2    | interferon gamma receptor 2                                                                                                                                                                                                                                                                                                                     |
| ifnz      | interferon zeta                                                                                                                                                                                                                                                                                                                                 |
| ift122    | intraflagellar transport 122 homolog (Chlamydomonas)                                                                                                                                                                                                                                                                                            |
| ift52     | intraflagellar transport 52 homolog (Chlamydomonas)                                                                                                                                                                                                                                                                                             |
| igbl      | immunoglobulin-associated beta-like complex                                                                                                                                                                                                                                                                                                     |
| igbp1     | immunoglobulin (CD79A) binding protein 1                                                                                                                                                                                                                                                                                                        |
| igh-1a    | similar to gamma-2a immunoglobulin heavy chain; immunoglobulin heavy chain 1a (serum IgG2a); immunoglobulin heavy chain 1b (serum IgG2c)                                                                                                                                                                                                        |
| igh-1b    | similar to gamma-2a immunoglobulin heavy chain; immunoglobulin heavy chain 1a (serum IgG2a); immunoglobulin heavy chain 1b (serum IgG2c)                                                                                                                                                                                                        |
| igh-2     | predicted gene 5353; immunoglobulin heavy chain (J558 family); similar to Ig heavy chain V region 108A precursor; similar to Ig heavy chain V-I region V35 precursor; predicted gene 900; immunoglobulin heavy chain complex; similar to Ig H-chain V-JH1-region; immunoglobulin heavy variable V1-31; immunoglobulin heavy chain 2 (serum IgA) |
| igh-3     | immunoglobulin heavy chain 3 (serum IgG2b); Immunoglobulin heavy chain (gamma polypeptide)                                                                                                                                                                                                                                                      |
| igh-5     | immunoglobulin heavy chain 5 (delta-like heavy chain)                                                                                                                                                                                                                                                                                           |
| igh-7     | immunoglobulin heavy chain 7 (heavy chain of IgE)                                                                                                                                                                                                                                                                                               |
| igh-8     | immunoglobulin heavy chain 8 (heavy chain of IgG3)                                                                                                                                                                                                                                                                                              |
| ighg      | immunoglobulin heavy chain 3 (serum IgG2b); Immunoglobulin heavy chain (gamma polypeptide)                                                                                                                                                                                                                                                      |
| ighg1     | immunoglobulin heavy constant gamma 1 (G1m marker)                                                                                                                                                                                                                                                                                              |
| igh-ia    | immunoglobulin heavy chain Ia                                                                                                                                                                                                                                                                                                                   |
| igh-pc    | immunoglobulin heavy chain Pc                                                                                                                                                                                                                                                                                                                   |
| igh-sa1   | immunoglobulin heavy chain Sa1                                                                                                                                                                                                                                                                                                                  |
| igh-vj558 | predicted gene 5353; immunoglobulin heavy chain (J558 family); similar to Ig heavy chain V region 108A precursor; similar to Ig heavy chain V-I region V35 precursor; predicted gene 900; immunoglobulin heavy chain complex; similar to Ig H-chain V-JH1-region; immunoglobulin heavy variable V1-31; immunoglobulin heavy chain 2 (serum IgA) |
| igk-v     | immunoglobulin kappa chain complex variable region                                                                                                                                                                                                                                                                                              |
| igkv1-110 | immunoglobulin kappa chain variable 1-110                                                                                                                                                                                                                                                                                                       |
| igkv1-135 | immunoglobulin kappa variable 1-135                                                                                                                                                                                                                                                                                                             |
| igk-v5    | immunoglobulin kappa chain variable 5 (V5 family)                                                                                                                                                                                                                                                                                               |

|          |                                                                                                                                         |
|----------|-----------------------------------------------------------------------------------------------------------------------------------------|
| igkv6-25 | immunoglobulin kappa chain variable 6-25                                                                                                |
| igl-c1   | immunoglobulin lambda chain, constant region 2; immunoglobulin lambda chain, constant region 1; immunoglobulin lambda chain, variable 1 |
| igl-c2   | immunoglobulin lambda chain, constant region 2; immunoglobulin lambda chain, constant region 1; immunoglobulin lambda chain, variable 1 |
| igl-j    | immunoglobulin lambda chain, joining region                                                                                             |
| igsf11   | immunoglobulin superfamily, member 11                                                                                                   |
| ihpk1    | interferon inducible GTPase 1; interferon-inducible GTPase-like                                                                         |
| iigp1    | interleukin 10 receptor, beta                                                                                                           |
| iigp2    | interleukin 11 receptor, alpha chain 2; predicted gene 13305; predicted gene, 100038993                                                 |
| il10rb   | interleukin 15 receptor, alpha chain                                                                                                    |
| il11ra2  | interleukin 22 receptor, alpha 2                                                                                                        |
| il15ra   | interleukin 15 receptor, alpha chain                                                                                                    |
| il22ra2  | interleukin 22 receptor, alpha 2                                                                                                        |
| il2rb    | interleukin 2 receptor, beta chain                                                                                                      |
| il2rg    | predicted gene 614; interleukin 2 receptor, gamma chain                                                                                 |
| il3ra    | interleukin 3 receptor, alpha chain                                                                                                     |
| il7r     | interleukin 7 receptor                                                                                                                  |
| il9r     | similar to interleukin 9 receptor; interleukin 9 receptor                                                                               |
| iltifb   | interleukin 10-related T cell-derived inducible factor beta; interleukin 22                                                             |
| ilvbl    | ilvB (bacterial acetolactate synthase)-like                                                                                             |
| inhbc    | inhibin beta-C                                                                                                                          |
| inhbe    | inhibin beta E                                                                                                                          |
| inpp4b   | inositol polyphosphate-4-phosphatase, type II                                                                                           |
| ints4    | integrator complex subunit 4                                                                                                            |
| ints9    | integrator complex subunit 9                                                                                                            |
| ipo11    | importin 11                                                                                                                             |
| ipo13    | importin 13                                                                                                                             |
| ipo4     | importin 4                                                                                                                              |
| ipo5     | hypothetical protein LOC100044315; importin 5                                                                                           |
| ipo7     | importin 7                                                                                                                              |
| iqcf4    | IQ motif containing F4                                                                                                                  |
| iqgap2   | IQ motif containing GTPase activating protein 2                                                                                         |
| iqgap3   | IQ motif containing GTPase activating protein 3                                                                                         |
| iqsec1   | IQ motif and Sec7 domain 1                                                                                                              |
| iqsec2   | IQ motif and Sec7 domain 2                                                                                                              |
| iqsec3   | IQ motif and Sec7 domain 3                                                                                                              |
| ir8      | immune response 8                                                                                                                       |
| irf9     | interferon regulatory factor 9                                                                                                          |
| islr     | immunoglobulin superfamily containing leucine-rich repeat                                                                               |
| islr2    | immunoglobulin superfamily containing leucine-rich repeat 2                                                                             |
| itga1    | integrin alpha 1                                                                                                                        |
| itga10   | integrin, alpha 10                                                                                                                      |
| itga11   | integrin alpha 11                                                                                                                       |
| itga7    | integrin alpha 7                                                                                                                        |
| itga8    | integrin alpha 8                                                                                                                        |
| itga9    | integrin alpha 9                                                                                                                        |
| itgad    | integrin, alpha D                                                                                                                       |
| itgae    | integrin alpha E, epithelial-associated                                                                                                 |
| itgb1bp1 | integrin beta 1 binding protein 1                                                                                                       |
| itgb1bp2 | integrin beta 1 binding protein 2                                                                                                       |
| itgb1bp3 | integrin beta 1 binding protein 3                                                                                                       |
| itgb2l   | integrin beta 2-like                                                                                                                    |
| itgb3bp  | predicted gene 3507; integrin beta 3 binding protein (beta3-endonexin); similar to integrin beta 3 binding protein                      |
| itgb5    | integrin beta 5                                                                                                                         |

|           |                                                                                   |
|-----------|-----------------------------------------------------------------------------------|
| itgb6     | integrin beta 6                                                                   |
| itgb7     | integrin beta 7                                                                   |
| itgb8     | integrin beta 8                                                                   |
| itgb1     | integrin, beta-like 1                                                             |
| itih1     | inter-alpha trypsin inhibitor, heavy chain 1                                      |
| itih2     | inter-alpha trypsin inhibitor, heavy chain 2                                      |
| itih3     | inter-alpha trypsin inhibitor, heavy chain 3                                      |
| itm2c     | integral membrane protein 2C                                                      |
| itpa-ps1  | inosine triphosphatase (nucleoside triphosphate pyrophosphatase) pseudogene 1     |
| itpa-ps3  | inosine triphosphatase (nucleoside triphosphate pyrophosphatase) pseudogene 3     |
| itsn1     | intersectin 1 (SH3 domain protein 1A)                                             |
| itsn2     | intersectin 2                                                                     |
| jmjd1b    | lysine (K)-specific demethylase 3B                                                |
| jrkl      | jerky homolog-like (mouse)                                                        |
| kalrn     | kalirin, RhoGEF kinase                                                            |
| kank1     | KN motif and ankyrin repeat domains 1                                             |
| kank2     | KN motif and ankyrin repeat domains 2                                             |
| kank3     | KN motif and ankyrin repeat domains 3                                             |
| kank4     | KN motif and ankyrin repeat domains 4                                             |
| kbtbd11   | kelch repeat and BTB (POZ) domain containing 11                                   |
| kbtbd7    | kelch repeat and BTB (POZ) domain containing 7                                    |
| kbtbd8    | kelch repeat and BTB (POZ) domain containing 8                                    |
| kcmf1     | potassium channel modulatory factor 1                                             |
| kcnab1    | potassium voltage-gated channel, shaker-related subfamily, beta member 1          |
| kcnab2    | potassium voltage-gated channel, shaker-related subfamily, beta member 2          |
| kcnab3    | potassium voltage-gated channel, shaker-related subfamily, beta member 3          |
| kcng2     | potassium voltage-gated channel, subfamily G, member 2                            |
| kcmb2     | potassium large conductance calcium-activated channel, subfamily M, beta member 2 |
| kcmb4     | potassium large conductance calcium-activated channel, subfamily M, beta member 4 |
| kcns1     | K+ voltage-gated channel, subfamily S, 1                                          |
| kcns2     | K+ voltage-gated channel, subfamily S, 2                                          |
| kcnu1     | potassium channel, subfamily U, member 1                                          |
| kctd13    | potassium channel tetramerisation domain containing 13                            |
| kdelr1    | KDEL (Lys-Asp-Glu-Leu) endoplasmic reticulum protein retention receptor 1         |
| kif13b    | kinesin family member 13B                                                         |
| kif19a    | kinesin family member 19A                                                         |
| kif20a    | kinesin family member 20A                                                         |
| kif9      | kinesin family member 9                                                           |
| kifl1-ps  | kinesin-like 1, pseudogene                                                        |
| klhdc1    | kelch domain containing 1                                                         |
| klhdc2    | kelch domain containing 2                                                         |
| klhdc3    | kelch domain containing 3                                                         |
| klhl20    | kelch-like 20 (Drosophila)                                                        |
| klhl31    | kelch-like 31 (Drosophila)                                                        |
| klhl5     | kelch-like 5 (Drosophila)                                                         |
| klk1b11   | kallikrein 1-related peptidase b11                                                |
| klk1b8    | kallikrein 1-related peptidase b8                                                 |
| kndc1     | kinase non-catalytic C-lobe domain (KIND) containing 1                            |
| kng2      | kininogen 2                                                                       |
| kpna1     | karyopherin (importin) alpha 1                                                    |
| kpna3     | karyopherin (importin) alpha 3                                                    |
| kpna4     | karyopherin (importin) alpha 4                                                    |
| kpna6     | karyopherin (importin) alpha 6                                                    |
| krtap12-1 | keratin associated protein 12-1                                                   |
| ktelc1    | KTEL (Lys-Tyr-Glu-Leu) containing 1                                               |

|              |                                                                                                                                                                                                                                                                                                                                                           |
|--------------|-----------------------------------------------------------------------------------------------------------------------------------------------------------------------------------------------------------------------------------------------------------------------------------------------------------------------------------------------------------|
| kti12        | KTI12 homolog, chromatin associated ( <i>S. cerevisiae</i> )                                                                                                                                                                                                                                                                                              |
| ktn1         | kinectin 1                                                                                                                                                                                                                                                                                                                                                |
| l1md-a1      | L1 repeat, A subfamily, member 1                                                                                                                                                                                                                                                                                                                          |
| lama3        | laminin, alpha 3                                                                                                                                                                                                                                                                                                                                          |
| lama4        | laminin, alpha 4                                                                                                                                                                                                                                                                                                                                          |
| lama5        | laminin, alpha 5                                                                                                                                                                                                                                                                                                                                          |
| lamb1-1      | laminin B1 subunit 1                                                                                                                                                                                                                                                                                                                                      |
| lamb2        | laminin, beta 2                                                                                                                                                                                                                                                                                                                                           |
| lamb3        | laminin, beta 3                                                                                                                                                                                                                                                                                                                                           |
| lamc1        | laminin, gamma 1                                                                                                                                                                                                                                                                                                                                          |
| lamc2        | laminin, gamma 2                                                                                                                                                                                                                                                                                                                                          |
| lamc3        | laminin gamma 3                                                                                                                                                                                                                                                                                                                                           |
| lamr1-rs5    | laminin receptor 1 (ribosomal protein SA), related sequence 5                                                                                                                                                                                                                                                                                             |
| lancl1       | LanC (bacterial lantibiotic synthetase component C)-like 1                                                                                                                                                                                                                                                                                                |
| lancl2       | LanC (bacterial lantibiotic synthetase component C)-like 2                                                                                                                                                                                                                                                                                                |
| lcn13        | lipocalin 13                                                                                                                                                                                                                                                                                                                                              |
| lcorl        | ligand dependent nuclear receptor corepressor-like                                                                                                                                                                                                                                                                                                        |
| lctl         | lactase-like                                                                                                                                                                                                                                                                                                                                              |
| len1         | eye lens protein 1                                                                                                                                                                                                                                                                                                                                        |
| leng9        | leukocyte receptor cluster (LRC) member 9                                                                                                                                                                                                                                                                                                                 |
| leprel2      | leprecan-like 2                                                                                                                                                                                                                                                                                                                                           |
| lgi2         | leucine-rich repeat LGI family, member 2                                                                                                                                                                                                                                                                                                                  |
| li           | lined                                                                                                                                                                                                                                                                                                                                                     |
| loc100034726 | predicted gene 15772                                                                                                                                                                                                                                                                                                                                      |
| loc100043188 | predicted gene 10696                                                                                                                                                                                                                                                                                                                                      |
| loc100043207 | amylase 2a1                                                                                                                                                                                                                                                                                                                                               |
| loc100043989 | similar to Ig heavy chain V region 7-39 precursor; similar to Ig heavy chain V region 345 precursor; similar to monoclonal anti-alpha-1,3-galactosyltransferase IgM heavy chain; similar to Ig heavy chain V region RF precursor; V(H)76 segment leader peptide; similar to Ig heavy chain V region 5-84 precursor; similar to Immunoglobulin heavy chain |
| loc16697     | keratin associated protein LOC16697                                                                                                                                                                                                                                                                                                                       |
| loc381763    | T-cell receptor beta chain V region                                                                                                                                                                                                                                                                                                                       |
| loc381765    | similar to T cell antigen receptor                                                                                                                                                                                                                                                                                                                        |
| loc382653    | immunoglobulin heavy chain variable region                                                                                                                                                                                                                                                                                                                |
| loc383420    | predicted gene 5241                                                                                                                                                                                                                                                                                                                                       |
| loc383650    | proteasome (prosome, macropain) subunit, beta type 6, pseudogene 2                                                                                                                                                                                                                                                                                        |
| loc432699    | VH gene product                                                                                                                                                                                                                                                                                                                                           |
| loc433466    | jumonji domain containing 7                                                                                                                                                                                                                                                                                                                               |
| loc436194    | predicted gene 5754                                                                                                                                                                                                                                                                                                                                       |
| loc544903    | similar to immunoglobulin mu-chain                                                                                                                                                                                                                                                                                                                        |
| loc621269    | actin, gamma, pseudogene 1                                                                                                                                                                                                                                                                                                                                |
| loc630253    | similar to Ig heavy chain V region 5-84 precursor                                                                                                                                                                                                                                                                                                         |
| loc636017    | immunoglobulin heavy chain                                                                                                                                                                                                                                                                                                                                |
| loc641050    | hypothetical protein LOC641050                                                                                                                                                                                                                                                                                                                            |
| loc641088    | similar to Ig heavy chain V region RF precursor                                                                                                                                                                                                                                                                                                           |
| loc665506    | similar to T-cell receptor beta-2 chain C region                                                                                                                                                                                                                                                                                                          |
| loc667655    | predicted gene 8747                                                                                                                                                                                                                                                                                                                                       |
| loc667882    | ubiquitin specific peptidase, pseudogene (USP17 homolog)                                                                                                                                                                                                                                                                                                  |
| loc676689    | similar to H-2 class I histocompatibility antigen, L-D alpha chain precursor                                                                                                                                                                                                                                                                              |
| lphn1        | latrophilin 1                                                                                                                                                                                                                                                                                                                                             |
| lrba         | LPS-responsive beige-like anchor                                                                                                                                                                                                                                                                                                                          |
| lrig2        | leucine-rich repeats and immunoglobulin-like domains 2                                                                                                                                                                                                                                                                                                    |
| lrrc18       | leucine rich repeat containing 18                                                                                                                                                                                                                                                                                                                         |
| lrrc26       | leucine rich repeat containing 26                                                                                                                                                                                                                                                                                                                         |
| lrrc59       | leucine rich repeat containing 59                                                                                                                                                                                                                                                                                                                         |

|          |                                                                                                                 |
|----------|-----------------------------------------------------------------------------------------------------------------|
| Irrc6    | leucine rich repeat containing 6 (testis)                                                                       |
| Irrc8a   | leucine rich repeat containing 8A                                                                               |
| Irrc8b   | leucine rich repeat containing 8 family, member B                                                               |
| Irrc8c   | leucine rich repeat containing 8 family, member C                                                               |
| Irrc8d   | leucine rich repeat containing 8D                                                                               |
| Irrc8e   | similar to Leucine rich repeat containing 8 family, member E; leucine rich repeat containing 8 family, member E |
| Irrn2    | leucine rich repeat protein 2, neuronal                                                                         |
| Isg1     | large subunit GTPase 1 homolog ( <i>S. cerevisiae</i> )                                                         |
| Ism12    | LSM12 homolog ( <i>S. cerevisiae</i> )                                                                          |
| Ism14a   | LSM14 homolog A (SCD6, <i>S. cerevisiae</i> )                                                                   |
| Isr      | lipolysis stimulated lipoprotein receptor                                                                       |
| luc7l    | Luc7 homolog ( <i>S. cerevisiae</i> )-like                                                                      |
| ly23     | lymphocyte antigen 23                                                                                           |
| ly6f     | lymphocyte antigen 6 complex, locus F                                                                           |
| ly6g5c   | lymphocyte antigen 6 complex, locus G5C                                                                         |
| ly6h     | similar to Lymphocyte antigen 6H precursor (Ly-6H); lymphocyte antigen 6 complex, locus H                       |
| ly77     | lymphocyte antigen 77                                                                                           |
| lyz1l    | lysozyme-like 1                                                                                                 |
| lyz14    | lysozyme-like 4                                                                                                 |
| Iztr1    | leucine-zipper-like transcriptional regulator, 1                                                                |
| mageb2   | melanoma antigen, family B, 1; melanoma antigen, family B, 2                                                    |
| man1a2   | mannosidase, alpha, class 1A, member 2                                                                          |
| man1b-rs | mannosidase 1, beta, related sequence                                                                           |
| mapk13   | mitogen-activated protein kinase 13                                                                             |
| mast4    | microtubule associated serine/threonine kinase family member 4                                                  |
| mat2a    | methionine adenosyltransferase II, alpha                                                                        |
| mat2b    | methionine adenosyltransferase II, beta                                                                         |
| mccc1    | methylcrotonoyl-Coenzyme A carboxylase 1 (alpha)                                                                |
| mccc2    | methylcrotonoyl-Coenzyme A carboxylase 2 (beta)                                                                 |
| mcf2     | mcf.2 transforming sequence                                                                                     |
| mcf2l    | mcf.2 transforming sequence-like                                                                                |
| mdn1     | midasin homolog (yeast)                                                                                         |
| mea1     | male enhanced antigen 1                                                                                         |
| med16    | mediator complex subunit 16                                                                                     |
| med29    | mediator complex subunit 29; predicted gene 9450                                                                |
| med6     | mediator of RNA polymerase II transcription, subunit 6 homolog (yeast)                                          |
| megf11   | multiple EGF-like-domains 11                                                                                    |
| mep1a    | meprin 1 alpha                                                                                                  |
| mep1b    | meprin 1 beta                                                                                                   |
| mett10d  | methyltransferase 10 domain containing                                                                          |
| mett11d1 | methyltransferase 11 domain containing 1                                                                        |
| mett1l   | methyltransferase like 1                                                                                        |
| mett13   | methyltransferase like 3                                                                                        |
| mfsd11   | major facilitator superfamily domain containing 11                                                              |
| mgat3    | mannoside acetylglucosaminyltransferase 3                                                                       |
| mgat5b   | mannoside acetylglucosaminyltransferase 5, isoenzyme B                                                          |
| mgll-rs2 | monoglyceride lipase, related sequence 2                                                                        |
| mical1   | microtubule associated monoxygenase, calponin and LIM domain containing 1                                       |
| mical3   | microtubule associated monoxygenase, calponin and LIM domain containing 3                                       |
| micalcl  | MICAL C-terminal like                                                                                           |
| micall1  | microtubule associated monoxygenase, calponin and LIM domain containing -like 1                                 |
| midn     | midnolin                                                                                                        |
| mif4gd   | MIF4G domain containing                                                                                         |
| mif-ps3  | macrophage migration inhibitory factor, pseudogene 3                                                            |

|          |                                                                                                                  |
|----------|------------------------------------------------------------------------------------------------------------------|
| minta    | Moloney MuLV integration site, EC cells, a                                                                       |
| mkrn2    | makorin, ring finger protein, 2                                                                                  |
| mmd      | monocyte to macrophage differentiation-associated; similar to monocyte to macrophage differentiation-associated  |
| mobkl2b  | MOB1, Mps One Binder kinase activator-like 2B (yeast)                                                            |
| mon1b    | MON1 homolog b (yeast)                                                                                           |
| mon2     | MON2 homolog (yeast)                                                                                             |
| morc4    | microorchidia 4                                                                                                  |
| morn4    | MORN repeat containing 4                                                                                         |
| mospd1   | predicted gene 2147; motile sperm domain containing 1                                                            |
| mospd2   | motile sperm domain containing 2                                                                                 |
| mov24    | Moloney leukemia virus 24                                                                                        |
| moxd2    | monooxygenase, DBH-like 2                                                                                        |
| mphosph8 | M-phase phosphoprotein 8                                                                                         |
| mpmv14   | modified polytropic murine leukemia virus 14                                                                     |
| mpmv23   | modified polytropic murine leukemia virus 23                                                                     |
| mppe1    | metallophosphoesterase 1                                                                                         |
| mpped1   | metallophosphoesterase domain containing 1                                                                       |
| mprip    | myosin phosphatase Rho interacting protein; predicted gene 8086                                                  |
| mr1      | major histocompatibility complex, class I-related                                                                |
| mras     | muscle and microspikes RAS                                                                                       |
| mrgrpf   | MAS-related GPR, member F                                                                                        |
| mrpl12   | mitochondrial ribosomal protein L12                                                                              |
| mrpl15   | mitochondrial ribosomal protein L15                                                                              |
| mrpl2    | mitochondrial ribosomal protein L2                                                                               |
| mrpl3    | mitochondrial ribosomal protein L3                                                                               |
| mrpl37   | mitochondrial ribosomal protein L37                                                                              |
| mrpl39   | mitochondrial ribosomal protein L39                                                                              |
| mrpl46   | mitochondrial ribosomal protein L46                                                                              |
| mrps11   | mitochondrial ribosomal protein S11                                                                              |
| mrps25   | mitochondrial ribosomal protein S25                                                                              |
| mrps31   | mitochondrial ribosomal protein S31                                                                              |
| mrps34   | mitochondrial ribosomal protein S34                                                                              |
| mrps35   | mitochondrial ribosomal protein S35                                                                              |
| mrps9    | mitochondrial ribosomal protein S9                                                                               |
| mrrf     | mitochondrial ribosome recycling factor; similar to mitochondrial ribosome recycling factor; predicted gene 6374 |
| mrto4    | predicted gene 9178; MRT4, mRNA turnover 4, homolog ( <i>S. cerevisiae</i> ); predicted gene 5633                |
| ms4a14   | membrane-spanning 4-domains, subfamily A, member 14                                                              |
| ms4a2    | membrane-spanning 4-domains, subfamily A, member 2                                                               |
| ms4a3    | membrane-spanning 4-domains, subfamily A, member 3                                                               |
| ms4a5    | membrane-spanning 4-domains, subfamily A, member 5                                                               |
| ms4a7    | membrane-spanning 4-domains, subfamily A, member 7                                                               |
| ms6-4    | minisatellite-4 detected by probe 33.6                                                                           |
| msto1    | misato homolog 1 ( <i>Drosophila</i> )                                                                           |
| mterfd3  | MTERF domain containing 3                                                                                        |
| mtmr7    | myotubularin related protein 7                                                                                   |
| mtfr1    | mitochondrial translational release factor 1                                                                     |
| mtv1     | mammary tumor virus locus 1                                                                                      |
| mtv11    | mammary tumor virus locus 11                                                                                     |
| mtv37    | mammary tumor virus locus 37                                                                                     |
| mtv43    | mammary tumor virus locus 43                                                                                     |
| mtv48    | mammary tumor virus locus 48                                                                                     |
| mtv50    | mammary tumor virus locus 50                                                                                     |
| mtv51    | mammary tumor virus locus 51                                                                                     |



|          |                                                                                               |
|----------|-----------------------------------------------------------------------------------------------|
| mtv54    | mammary tumor virus locus 54                                                                  |
| mtv6     | mammary tumor virus locus 6                                                                   |
| mtv7     | mammary tumor virus locus 7                                                                   |
| mtv8     | mammary tumor virus locus 8                                                                   |
| mtv9     | mammary tumor virus locus 9                                                                   |
| mtx2     | metaxin 2                                                                                     |
| mtx3     | metaxin 3                                                                                     |
| mug1     | murinoglobulin 1; predicted gene 7298                                                         |
| mug2     | murinoglobulin 2                                                                              |
| mug4     | murinoglobulin 4                                                                              |
| mug-ps1  | murinoglobulin, pseudogene 1                                                                  |
| mycbpap  | MYCBP associated protein                                                                      |
| myef2    | myelin basic protein expression factor 2, repressor                                           |
| myg1     | melanocyte proliferating gene 1                                                               |
| mynf1    | myeloid nuclear factor 1                                                                      |
| mynn     | myoneurin                                                                                     |
| myo1f    | myosin IF                                                                                     |
| myo9a    | myosin IXa                                                                                    |
| myo9b    | myosin IXb                                                                                    |
| n6amt1   | N-6 adenine-specific DNA methyltransferase 1 (putative)                                       |
| naif1    | nuclear apoptosis inducing factor 1                                                           |
| narg2    | NMDA receptor-regulated gene 2                                                                |
| nasp-ps1 | nuclear autoantigenic sperm protein (histone-binding), pseudogene 1                           |
| nat14    | N-acetyltransferase 14                                                                        |
| nat5     | N-acetyltransferase 5                                                                         |
| nbea     | neurobeachin                                                                                  |
| nbeal1   | neurobeachin like 1                                                                           |
| ncaph2   | non-SMC condensin II complex, subunit H2                                                      |
| nckap1   | NCK-associated protein 1                                                                      |
| ncoa7    | nuclear receptor coactivator 7                                                                |
| ndufa6   | NADH dehydrogenase (ubiquinone) 1 alpha subcomplex, 6 (B14)                                   |
| ndufb4   | NADH dehydrogenase (ubiquinone) 1 beta subcomplex 4; predicted gene 3873; predicted gene 3244 |
| ndufb5   | NADH dehydrogenase (ubiquinone) 1 beta subcomplex, 5                                          |
| ndufb7   | NADH dehydrogenase (ubiquinone) 1 beta subcomplex, 7                                          |
| ndufc1   | predicted gene 4237; NADH dehydrogenase (ubiquinone) 1, subcomplex unknown, 1                 |
| nek3     | NIMA (never in mitosis gene a)-related expressed kinase 3                                     |
| net1     | predicted gene 8990; neuroepithelial cell transforming gene 1                                 |
| nfrkb    | nuclear factor related to kappa B binding protein                                             |
| nfu1     | NFU1 iron-sulfur cluster scaffold homolog (S. cerevisiae); predicted gene 7859                |
| nfxl1    | nuclear transcription factor, X-box binding-like 1                                            |
| ng23     | Ng23 protein                                                                                  |
| ngef     | neuronal guanine nucleotide exchange factor                                                   |
| ngrn     | neugrin, neurite outgrowth associated                                                         |
| nicn1    | nicolin 1                                                                                     |
| nif3l1   | Ngg1 interacting factor 3-like 1 (S. pombe)                                                   |
| nip7     | nuclear import 7 homolog (S. cerevisiae)                                                      |
| nisch    | nischarin                                                                                     |
| nkain1   | Na <sup>+</sup> /K <sup>+</sup> transporting ATPase interacting 1                             |
| nkain2   | Na <sup>+</sup> /K <sup>+</sup> transporting ATPase interacting 2                             |
| nkain3   | Na <sup>+</sup> /K <sup>+</sup> transporting ATPase interacting 3                             |
| nkain4   | Na <sup>+</sup> /K <sup>+</sup> transporting ATPase interacting 4                             |
| nkg7     | natural killer cell group 7 sequence                                                          |
| nkpd1    | NTPase, KAP family P-loop domain containing 1                                                 |
| nlrc4    | NLR family, CARD domain containing 4                                                          |
| nlrp10   | NLR family, pyrin domain containing 10                                                        |

|           |                                                                                                                                                                                              |
|-----------|----------------------------------------------------------------------------------------------------------------------------------------------------------------------------------------------|
| nlrp12    | NLR family, pyrin domain containing 12                                                                                                                                                       |
| nlrp1a    | NLR family, pyrin domain containing 1A                                                                                                                                                       |
| nlrp1b    | NLR family, pyrin domain containing 1B                                                                                                                                                       |
| nlrp2     | NLR family, pyrin domain containing 2                                                                                                                                                        |
| nlrp4e    | predicted gene 4541; predicted gene 8685; predicted gene 8567; NLR family, pyrin domain containing 4E; predicted gene 8486; predicted gene 16443; predicted gene 8728                        |
| nlrp6     | NLR family, pyrin domain containing 6                                                                                                                                                        |
| nlrp9a    | similar to NALP9A; NLR family, pyrin domain containing 9A                                                                                                                                    |
| nlrp9c    | NLR family, pyrin domain containing 9C                                                                                                                                                       |
| nme2      | predicted gene 7730; non-metastatic cells 2, protein (NM23B) expressed in; predicted gene 5566; predicted gene 5425; similar to Nucleoside diphosphate kinase B (NDK B) (NDP kinase B) (P18) |
| nme4      | non-metastatic cells 4, protein expressed in                                                                                                                                                 |
| nme6      | similar to Nme6 protein; non-metastatic cells 6, protein expressed in (nucleoside-diphosphate kinase)                                                                                        |
| nme7      | non-metastatic cells 7, protein expressed in (nucleoside-diphosphate kinase)                                                                                                                 |
| nob1      | NIN1/RPN12 binding protein 1 homolog ( <i>S. cerevisiae</i> )                                                                                                                                |
| nol10     | nucleolar protein 10                                                                                                                                                                         |
| nol14     | nucleolar protein 14                                                                                                                                                                         |
| nol4      | nucleolar protein 4                                                                                                                                                                          |
| nol8      | nucleolar protein 8                                                                                                                                                                          |
| npdc1     | neural proliferation, differentiation and control gene 1                                                                                                                                     |
| npm3-ps1  | nucleoplasmin 3; nucleoplasmin 3, pseudogene 1                                                                                                                                               |
| npnt      | nephronectin                                                                                                                                                                                 |
| nr1d2     | nuclear receptor subfamily 1, group D, member 2; predicted gene 5827                                                                                                                         |
| nr1d2-rs2 | nuclear receptor subfamily 1, group D, member 2, related sequence 2                                                                                                                          |
| nr2c1     | nuclear receptor subfamily 2, group C, member 1                                                                                                                                              |
| nrbf2     | nuclear receptor binding factor 2                                                                                                                                                            |
| nrbp1     | nuclear receptor binding protein 1                                                                                                                                                           |
| nrsn2     | neurensin 2                                                                                                                                                                                  |
| nsbp1     | high-mobility group nucleosome binding domain 5                                                                                                                                              |
| nsg2      | neuron specific gene family member 2                                                                                                                                                         |
| nudt5     | nudix (nucleoside diphosphate linked moiety X)-type motif 5                                                                                                                                  |
| nutf2-ps1 | nuclear transport factor 2, pseudogene 1                                                                                                                                                     |
| nvl       | nuclear VCP-like                                                                                                                                                                             |
| nxph2     | neurexophilin 2                                                                                                                                                                              |
| obfc1     | oligonucleotide/oligosaccharide-binding fold containing 1                                                                                                                                    |
| odc-rs9   | ornithine decarboxylase, related sequence 9                                                                                                                                                  |
| odf3      | outer dense fiber of sperm tails 3                                                                                                                                                           |
| odf4      | outer dense fiber of sperm tails 4                                                                                                                                                           |
| oit3      | oncoprotein induced transcript 3                                                                                                                                                             |
| ola1      | Obg-like ATPase 1                                                                                                                                                                            |
| olfml1    | olfactomedin-like 1                                                                                                                                                                          |
| olfml3    | olfactomedin-like 3                                                                                                                                                                          |
| olfr1310  | olfactory receptor 1310                                                                                                                                                                      |
| olfr1342  | olfactory receptor 1342                                                                                                                                                                      |
| olfr71    | olfactory receptor 71                                                                                                                                                                        |
| olfr937   | olfactory receptor 937                                                                                                                                                                       |
| olfr985   | olfactory receptor 985                                                                                                                                                                       |
| oog1      | predicted gene 2042; predicted gene 10436; oogenesis 1; expressed sequence C87977                                                                                                            |
| oog2      | oogenesis 2                                                                                                                                                                                  |
| oog3      | predicted gene 4350; oogenesis 3                                                                                                                                                             |
| oog4      | oogenesis 4                                                                                                                                                                                  |
| oosp1     | oocyte secreted protein 1                                                                                                                                                                    |
| orf61     | open reading frame 61                                                                                                                                                                        |
| orm1      | orosomuroid 1                                                                                                                                                                                |
| orm3      | orosomuroid 3                                                                                                                                                                                |

|                    |                                                                                                                                                                        |
|--------------------|------------------------------------------------------------------------------------------------------------------------------------------------------------------------|
| ormd12             | ORM1-like 2 ( <i>S. cerevisiae</i> ); predicted gene 5553                                                                                                              |
| osbp16             | oxysterol binding protein-like 6                                                                                                                                       |
| osbp17             | oxysterol binding protein-like 7                                                                                                                                       |
| osgep1             | O-sialoglycoprotein endopeptidase-like 1                                                                                                                               |
| ottmusg0000000246  | predicted gene 11212                                                                                                                                                   |
| ottmusg00000004461 | predicted gene 11818                                                                                                                                                   |
| ottmusg00000005491 | family with sequence similarity 71, member B                                                                                                                           |
| ottmusg00000010328 | predicted gene 13084                                                                                                                                                   |
| ottmusg00000011275 | predicted gene 13280                                                                                                                                                   |
| ottmusg00000011291 | predicted gene 13290                                                                                                                                                   |
| ottmusg00000012291 | predicted gene 13458                                                                                                                                                   |
| ottmusg00000015025 | predicted gene 13893                                                                                                                                                   |
| ottmusg00000015050 | T cell receptor alpha variable 9D-4                                                                                                                                    |
| ottmusg00000015102 | predicted gene 16454                                                                                                                                                   |
| ottmusg00000015160 | T cell receptor alpha variable 6-3                                                                                                                                     |
| ottmusg00000015161 | T cell receptor alpha variable 7-4                                                                                                                                     |
| ottmusg00000015181 | T cell receptor alpha variable 7D-4                                                                                                                                    |
| ottmusg00000020615 | predicted gene 15352                                                                                                                                                   |
| ottmusg00000022462 | amylase 2b                                                                                                                                                             |
| oua1               | ouabain resistance 1                                                                                                                                                   |
| p42pop             | Myb-related transcription factor, partner of profilin                                                                                                                  |
| p4ha1              | procollagen-proline, 2-oxoglutarate 4-dioxygenase (proline 4-hydroxylase), alpha 1 polypeptide                                                                         |
| p4ha2              | procollagen-proline, 2-oxoglutarate 4-dioxygenase (proline 4-hydroxylase), alpha II polypeptide                                                                        |
| p4ha3              | procollagen-proline, 2-oxoglutarate 4-dioxygenase (proline 4-hydroxylase), alpha polypeptide III                                                                       |
| pabpc4             | similar to Poly A binding protein, cytoplasmic 4; poly(A) binding protein, cytoplasmic 4; predicted gene 12623; predicted gene 5088; hypothetical protein LOC100044219 |
| pabpc5             | poly(A) binding protein, cytoplasmic 5                                                                                                                                 |
| pabpn1             | poly(A) binding protein nuclear 1-like                                                                                                                                 |
| pafah1b2           | platelet-activating factor acetylhydrolase, isoform 1b, subunit 2                                                                                                      |
| pafah1b3           | platelet-activating factor acetylhydrolase, isoform 1b, subunit 3                                                                                                      |
| pak1ip1            | PAK1 interacting protein 1                                                                                                                                             |
| pak3               | p21 protein (Cdc42/Rac)-activated kinase 3                                                                                                                             |
| pak4               | p21 protein (Cdc42/Rac)-activated kinase 4                                                                                                                             |
| pak6               | p21 protein (Cdc42/Rac)-activated kinase 6                                                                                                                             |
| palmd              | palmdelphin; similar to palmdelphin                                                                                                                                    |
| pank1              | pantothenate kinase 1                                                                                                                                                  |
| papolg             | poly(A) polymerase gamma                                                                                                                                               |
| paqr5              | progesterin and adipoQ receptor family member V                                                                                                                        |
| paqr6              | progesterin and adipoQ receptor family member VI; predicted gene 6821                                                                                                  |
| paqr7              | progesterin and adipoQ receptor family member VII                                                                                                                      |
| paqr8              | progesterin and adipoQ receptor family member VIII                                                                                                                     |
| paqr9              | progesterin and adipoQ receptor family member IX                                                                                                                       |
| parp12             | poly (ADP-ribose) polymerase family, member 12                                                                                                                         |
| parvb              | parvin, beta; similar to parvin, beta                                                                                                                                  |
| pat1               | protein associated with topoisomerase II homolog 1 (yeast)                                                                                                             |
| pat2               | protein associated with topoisomerase II homolog 2 (yeast)                                                                                                             |

|         |                                                                                                                                                                                                                                                                                                                                                                                                           |
|---------|-----------------------------------------------------------------------------------------------------------------------------------------------------------------------------------------------------------------------------------------------------------------------------------------------------------------------------------------------------------------------------------------------------------|
| pcbp3   | poly(rC) binding protein 3                                                                                                                                                                                                                                                                                                                                                                                |
| pcca    | propionyl-Coenzyme A carboxylase, alpha polypeptide                                                                                                                                                                                                                                                                                                                                                       |
| pccb    | propionyl Coenzyme A carboxylase, beta polypeptide                                                                                                                                                                                                                                                                                                                                                        |
| pcdh1   | protocadherin 1                                                                                                                                                                                                                                                                                                                                                                                           |
| pcdh3   | protocadherin 3                                                                                                                                                                                                                                                                                                                                                                                           |
| pcdha1  | similar to protocadherin; protocadherin alpha 10; protocadherin alpha 9; protocadherin alpha 6; protocadherin alpha 12; similar to protocadherin alpha 11; protocadherin alpha 7; protocadherin alpha 11; protocadherin alpha 1; protocadherin alpha 5; protocadherin alpha 4; protocadherin alpha 2; protocadherin alpha subfamily C, 1; protocadherin alpha subfamily C, 2; protocadherin alpha cluster |
| pcdha4  | similar to protocadherin; protocadherin alpha 10; protocadherin alpha 9; protocadherin alpha 6; protocadherin alpha 12; similar to protocadherin alpha 11; protocadherin alpha 7; protocadherin alpha 11; protocadherin alpha 1; protocadherin alpha 5; protocadherin alpha 4; protocadherin alpha 2; protocadherin alpha subfamily C, 1; protocadherin alpha subfamily C, 2; protocadherin alpha cluster |
| pcdha12 | protocadherin beta 12                                                                                                                                                                                                                                                                                                                                                                                     |
| pcdhga1 | protocadherin gamma subfamily A, 1                                                                                                                                                                                                                                                                                                                                                                        |
| pcp2    | Purkinje cell protein 2 (L7)                                                                                                                                                                                                                                                                                                                                                                              |
| pctk2   | cyclin-dependent kinase 17                                                                                                                                                                                                                                                                                                                                                                                |
| pcd     | phosducin                                                                                                                                                                                                                                                                                                                                                                                                 |
| pdcl    | phosducin-like                                                                                                                                                                                                                                                                                                                                                                                            |
| pdcl2   | phosducin-like 2                                                                                                                                                                                                                                                                                                                                                                                          |
| pdcl3   | phosducin-like 3                                                                                                                                                                                                                                                                                                                                                                                          |
| pde6a   | phosphodiesterase 6A, cGMP-specific, rod, alpha                                                                                                                                                                                                                                                                                                                                                           |
| pde6d   | phosphodiesterase 6D, cGMP-specific, rod, delta                                                                                                                                                                                                                                                                                                                                                           |
| pde6g   | phosphodiesterase 6G, cGMP-specific, rod, gamma                                                                                                                                                                                                                                                                                                                                                           |
| pde6h   | phosphodiesterase 6H, cGMP-specific, cone, gamma                                                                                                                                                                                                                                                                                                                                                          |
| pdha2   | pyruvate dehydrogenase E1 alpha 2                                                                                                                                                                                                                                                                                                                                                                         |
| pdhb    | predicted gene 6123; pyruvate dehydrogenase (lipoamide) beta                                                                                                                                                                                                                                                                                                                                              |
| pdhx    | pyruvate dehydrogenase complex, component X; similar to pyruvate dehydrogenase complex, component X                                                                                                                                                                                                                                                                                                       |
| pdik1l  | PDLIM1 interacting kinase 1 like                                                                                                                                                                                                                                                                                                                                                                          |
| pdzd4   | PDZ domain containing 4                                                                                                                                                                                                                                                                                                                                                                                   |
| pepb    | peptidase B                                                                                                                                                                                                                                                                                                                                                                                               |
| pepc    | peptidase C                                                                                                                                                                                                                                                                                                                                                                                               |
| pet112l | PET112-like (yeast)                                                                                                                                                                                                                                                                                                                                                                                       |
| pet2    | plasmacytoma expressed transcript 2                                                                                                                                                                                                                                                                                                                                                                       |
| pgbd1   | piggyBac transposable element derived 1                                                                                                                                                                                                                                                                                                                                                                   |
| pgbd5   | piggyBac transposable element derived 5                                                                                                                                                                                                                                                                                                                                                                   |
| pggt1b  | protein geranylgeranyltransferase type I, beta subunit                                                                                                                                                                                                                                                                                                                                                    |
| pgls    | 6-phosphogluconolactonase                                                                                                                                                                                                                                                                                                                                                                                 |
| phactr3 | phosphatase and actin regulator 3                                                                                                                                                                                                                                                                                                                                                                         |
| phf7    | PHD finger protein 7                                                                                                                                                                                                                                                                                                                                                                                      |
| phka1   | phosphorylase kinase alpha 1                                                                                                                                                                                                                                                                                                                                                                              |
| phka2   | phosphorylase kinase alpha 2                                                                                                                                                                                                                                                                                                                                                                              |
| phkb    | phosphorylase kinase beta                                                                                                                                                                                                                                                                                                                                                                                 |
| phkg1   | phosphorylase kinase gamma 1                                                                                                                                                                                                                                                                                                                                                                              |
| phkg2   | phosphorylase kinase, gamma 2 (testis)                                                                                                                                                                                                                                                                                                                                                                    |
| phldb1  | pleckstrin homology-like domain, family B, member 1                                                                                                                                                                                                                                                                                                                                                       |
| phf2    | putative homeodomain transcription factor 2                                                                                                                                                                                                                                                                                                                                                               |
| pigy    | phosphatidylinositol glycan anchor biosynthesis, class Y                                                                                                                                                                                                                                                                                                                                                  |
| pigyl   | phosphatidylinositol glycan anchor biosynthesis, class Y-like                                                                                                                                                                                                                                                                                                                                             |
| pigz    | phosphatidylinositol glycan anchor biosynthesis, class Z                                                                                                                                                                                                                                                                                                                                                  |
| pik3cb  | phosphatidylinositol 3-kinase, catalytic, beta polypeptide                                                                                                                                                                                                                                                                                                                                                |
| pik3r3  | phosphatidylinositol 3 kinase, regulatory subunit, polypeptide 3 (p55)                                                                                                                                                                                                                                                                                                                                    |
| pik3r5  | phosphoinositide-3-kinase, regulatory subunit 5, p101                                                                                                                                                                                                                                                                                                                                                     |
| pik3r6  | phosphoinositide-3-kinase, regulatory subunit 6                                                                                                                                                                                                                                                                                                                                                           |
| pip4k2a | phosphatidylinositol-5-phosphate 4-kinase, type II, alpha                                                                                                                                                                                                                                                                                                                                                 |
| pip5k1a | phosphatidylinositol-4-phosphate 5-kinase, type 1 alpha                                                                                                                                                                                                                                                                                                                                                   |

|         |                                                                                                                           |
|---------|---------------------------------------------------------------------------------------------------------------------------|
| pip5k1b | phosphatidylinositol-4-phosphate 5-kinase, type 1 beta; similar to phosphatidylinositol 4-phosphate 5-kinase type I-alpha |
| pip5k1c | phosphatidylinositol-4-phosphate 5-kinase, type 1 gamma                                                                   |
| pitpna  | phosphatidylinositol transfer protein, alpha                                                                              |
| pitpnb  | phosphatidylinositol transfer protein, beta                                                                               |
| pitpnc1 | phosphatidylinositol transfer protein, cytoplasmic 1                                                                      |
| pitpnm1 | phosphatidylinositol transfer protein, membrane-associated 1                                                              |
| pitpnm3 | PITPNM family member 3                                                                                                    |
| pkia    | protein kinase inhibitor, alpha                                                                                           |
| pkib    | protein kinase inhibitor beta, cAMP dependent, testis specific                                                            |
| pkig    | similar to protein kinase inhibitor gamma; protein kinase inhibitor, gamma; predicted gene 6334                           |
| pkn3    | protein kinase N3                                                                                                         |
| pla2g4b | phospholipase A2, group IVB (cytosolic); jumonji domain containing 7                                                      |
| pla2g4d | phospholipase A2, group IVD                                                                                               |
| pla2g4e | phospholipase A2, group IVE                                                                                               |
| pla2g4f | phospholipase A2, group IVF                                                                                               |
| plac9   | placenta specific 9; predicted gene 10393; predicted gene 9780                                                            |
| plcb1   | phospholipase C, beta 1                                                                                                   |
| plcb2   | phospholipase C, beta 2                                                                                                   |
| plcb3   | phospholipase C, beta 3                                                                                                   |
| plcd1   | phospholipase C, delta 1                                                                                                  |
| plcd2   | phospholipase C, delta 2                                                                                                  |
| plce1   | phospholipase C, epsilon 1                                                                                                |
| plcg2   | phospholipase C, gamma 2                                                                                                  |
| plch1   | phospholipase C, eta 1                                                                                                    |
| plch2   | phospholipase C, eta 2                                                                                                    |
| plcl1   | phospholipase C-like 1                                                                                                    |
| plcl2   | phospholipase C-like 2                                                                                                    |
| pld4    | phospholipase D family, member 4                                                                                          |
| plek    | pleckstrin                                                                                                                |
| plek2   | pleckstrin 2                                                                                                              |
| plekha3 | pleckstrin homology domain-containing, family A (phosphoinositide binding specific) member 3                              |
| plekha8 | pleckstrin homology domain containing, family A (phosphoinositide binding specific) member 8                              |
| plekha2 | pleckstrin homology domain containing, family B (evectins) member 2                                                       |
| plekhg2 | pleckstrin homology domain containing, family G (with RhoGef domain) member 2                                             |
| plekhg5 | pleckstrin homology domain containing, family G (with RhoGef domain) member 5                                             |
| plekhg6 | pleckstrin homology domain containing, family G (with RhoGef domain) member 6                                             |
| plekhj1 | pleckstrin homology domain containing, family J member 1                                                                  |
| plk-ps1 | polo-like kinase, pseudogene 1                                                                                            |
| pltr6   | polytropic long terminal repeat containing proviral locus 6                                                               |
| plxnb1  | plexin B1                                                                                                                 |
| plxnb2  | plexin B2                                                                                                                 |
| plxnb3  | plexin B3                                                                                                                 |
| pmpca   | peptidase (mitochondrial processing) alpha                                                                                |
| pmv11   | polytropic murine leukemia virus 11                                                                                       |
| pmv23   | polytropic murine leukemia virus 23                                                                                       |
| pmv39   | polytropic murine leukemia virus 39                                                                                       |
| pnma5   | paraneoplastic antigen family 5                                                                                           |
| pno1    | partner of NOB1 homolog (S. cerevisiae)                                                                                   |
| pnpla8  | patatin-like phospholipase domain containing 8                                                                            |
| pol     | pol protein                                                                                                               |
| pola2   | polymerase (DNA directed), alpha 2                                                                                        |
| pold1   | polymerase (DNA directed), delta 1, catalytic subunit                                                                     |
| pold2   | polymerase (DNA directed), delta 2, regulatory subunit                                                                    |
| pold3   | polymerase (DNA-directed), delta 3, accessory subunit                                                                     |

|            |                                                                                                                                                                                                                                                                                                                                                                                                  |
|------------|--------------------------------------------------------------------------------------------------------------------------------------------------------------------------------------------------------------------------------------------------------------------------------------------------------------------------------------------------------------------------------------------------|
| pold4      | polymerase (DNA-directed), delta 4                                                                                                                                                                                                                                                                                                                                                               |
| pole       | polymerase (DNA directed), epsilon                                                                                                                                                                                                                                                                                                                                                               |
| pole2      | polymerase (DNA directed), epsilon 2 (p59 subunit)                                                                                                                                                                                                                                                                                                                                               |
| pole3      | polymerase (DNA directed), epsilon 3 (p17 subunit)                                                                                                                                                                                                                                                                                                                                               |
| pole4      | polymerase (DNA-directed), epsilon 4 (p12 subunit)                                                                                                                                                                                                                                                                                                                                               |
| polg2      | polymerase (DNA directed), gamma 2, accessory subunit                                                                                                                                                                                                                                                                                                                                            |
| polr2h     | predicted gene 7511; polymerase (RNA) II (DNA directed) polypeptide H                                                                                                                                                                                                                                                                                                                            |
| polr2i     | similar to RNA Polymerase II subunit 14.5 kD; polymerase (RNA) II (DNA directed) polypeptide I                                                                                                                                                                                                                                                                                                   |
| polr2k     | polymerase (RNA) II (DNA directed) polypeptide K; similar to polymerase (RNA) II (DNA directed) polypeptide K                                                                                                                                                                                                                                                                                    |
| polr2l     | similar to DNA-directed RNA polymerase II 7.6 kDa polypeptide (RPB10) (RPB7.6) (RPABC5); hypothetical protein LOC100044218; predicted gene 13015; polymerase (RNA) II (DNA directed) polypeptide L; cytochrome P450, family 4, subfamily a, polypeptide 31; cytochrome P450, family 4, subfamily a, polypeptide 32; predicted gene 10774; cytochrome P450, family 4, subfamily a, polypeptide 10 |
| polr3e     | polymerase (RNA) III (DNA directed) polypeptide E                                                                                                                                                                                                                                                                                                                                                |
| pomp       | similar to proteasome maturation protein; proteasome maturation protein                                                                                                                                                                                                                                                                                                                          |
| pop1       | processing of precursor 1, ribonuclease P/MRP family, ( <i>S. cerevisiae</i> )                                                                                                                                                                                                                                                                                                                   |
| pop5       | processing of precursor 5, ribonuclease P/MRP family ( <i>S. cerevisiae</i> )                                                                                                                                                                                                                                                                                                                    |
| ppa2       | pyrophosphatase (inorganic) 2                                                                                                                                                                                                                                                                                                                                                                    |
| ppan       | peter pan homolog ( <i>Drosophila</i> )                                                                                                                                                                                                                                                                                                                                                          |
| ppap2b     | phosphatidic acid phosphatase type 2B                                                                                                                                                                                                                                                                                                                                                            |
| ppargc1b   | peroxisome proliferative activated receptor, gamma, coactivator 1 beta                                                                                                                                                                                                                                                                                                                           |
| ppfibp1    | PTPRF interacting protein, binding protein 1 (liprin beta 1); similar to mKIAA1230 protein                                                                                                                                                                                                                                                                                                       |
| ppfibp2    | protein tyrosine phosphatase, receptor-type, F interacting protein, binding protein 2                                                                                                                                                                                                                                                                                                            |
| ppie       | peptidylprolyl isomerase E (cyclophilin E)                                                                                                                                                                                                                                                                                                                                                       |
| ppil3      | peptidylprolyl isomerase (cyclophilin)-like 3                                                                                                                                                                                                                                                                                                                                                    |
| ppil4      | peptidylprolyl isomerase (cyclophilin)-like 4                                                                                                                                                                                                                                                                                                                                                    |
| ppi-ps1    | peptidylprolyl isomerase, pseudogene 1                                                                                                                                                                                                                                                                                                                                                           |
| ppi-ps2    | peptidylprolyl isomerase, pseudogene 2                                                                                                                                                                                                                                                                                                                                                           |
| ppi-ps3    | peptidylprolyl isomerase, pseudogene 3                                                                                                                                                                                                                                                                                                                                                           |
| ppi-ps4    | peptidylprolyl isomerase, pseudogene 4                                                                                                                                                                                                                                                                                                                                                           |
| ppi-ps5    | peptidylprolyl isomerase, pseudogene 5                                                                                                                                                                                                                                                                                                                                                           |
| ppm1b      | similar to serine/threonine phosphatase; protein phosphatase 1B, magnesium dependent, beta isoform                                                                                                                                                                                                                                                                                               |
| ppm1e      | protein phosphatase 1E (PP2C domain containing)                                                                                                                                                                                                                                                                                                                                                  |
| ppm1f      | protein phosphatase 1F (PP2C domain containing)                                                                                                                                                                                                                                                                                                                                                  |
| ppp1cb     | protein phosphatase 1, catalytic subunit, beta isoform                                                                                                                                                                                                                                                                                                                                           |
| ppp1cc-ps1 | protein phosphatase 1, catalytic subunit, gamma isoform, pseudogene 1                                                                                                                                                                                                                                                                                                                            |
| ppp1r12b   | protein phosphatase 1, regulatory (inhibitor) subunit 12B                                                                                                                                                                                                                                                                                                                                        |
| ppp1r14d   | protein phosphatase 1, regulatory (inhibitor) subunit 14D                                                                                                                                                                                                                                                                                                                                        |
| ppp1r16a   | protein phosphatase 1, regulatory (inhibitor) subunit 16A                                                                                                                                                                                                                                                                                                                                        |
| ppp1r7     | protein phosphatase 1, regulatory (inhibitor) subunit 7                                                                                                                                                                                                                                                                                                                                          |
| ppp2ca     | protein phosphatase 2 (formerly 2A), catalytic subunit, alpha isoform                                                                                                                                                                                                                                                                                                                            |
| ppp2cb     | similar to protein phosphatase 2a, catalytic subunit, beta isoform; protein phosphatase 2 (formerly 2A), catalytic subunit, beta isoform                                                                                                                                                                                                                                                         |
| ppp2r1a    | protein phosphatase 2 (formerly 2A), regulatory subunit A (PR 65), alpha isoform                                                                                                                                                                                                                                                                                                                 |
| ppp2r1b    | protein phosphatase 2 (formerly 2A), regulatory subunit A (PR 65), beta isoform                                                                                                                                                                                                                                                                                                                  |
| ppp2r2a    | protein phosphatase 2 (formerly 2A), regulatory subunit B (PR 52), alpha isoform                                                                                                                                                                                                                                                                                                                 |
| ppp2r2b    | protein phosphatase 2 (formerly 2A), regulatory subunit B (PR 52), beta isoform                                                                                                                                                                                                                                                                                                                  |
| ppp2r2c    | protein phosphatase 2 (formerly 2A), regulatory subunit B (PR 52), gamma isoform                                                                                                                                                                                                                                                                                                                 |
| ppp2r2d    | protein phosphatase 2, regulatory subunit B, delta isoform                                                                                                                                                                                                                                                                                                                                       |
| ppp2r3a    | protein phosphatase 2 (formerly 2A), regulatory subunit B", alpha; RIKEN cDNA 3222402P14 gene                                                                                                                                                                                                                                                                                                    |
| ppp2r4     | protein phosphatase 2A, regulatory subunit B (PR 53)                                                                                                                                                                                                                                                                                                                                             |
| ppp2r5a    | predicted gene 3353; predicted gene 13142; predicted gene 13169; similar to protein phosphatase 2, regulatory subunit B (B56), alpha isoform; predicted gene 13244; predicted gene 13233; protein phosphatase 2, regulatory subunit B (B56), alpha isoform                                                                                                                                       |
| ppp2r5b    | protein phosphatase 2, regulatory subunit B (B56), beta isoform                                                                                                                                                                                                                                                                                                                                  |
| ppp2r5c    | protein phosphatase 2, regulatory subunit B (B56), gamma isoform                                                                                                                                                                                                                                                                                                                                 |

|            |                                                                                    |
|------------|------------------------------------------------------------------------------------|
| ppp2r5d    | protein phosphatase 2, regulatory subunit B (B56), delta isoform                   |
| ppp2r5e    | protein phosphatase 2, regulatory subunit B (B56), epsilon isoform                 |
| ppp3cc     | protein phosphatase 3, catalytic subunit, gamma isoform                            |
| ppp4r1     | protein phosphatase 4, regulatory subunit 1                                        |
| pptc7      | PTC7 protein phosphatase homolog ( <i>S. cerevisiae</i> )                          |
| pramel1    | preferentially expressed antigen in melanoma-like 1                                |
| preb       | prolactin regulatory element binding                                               |
| prim1      | DNA primase, p49 subunit                                                           |
| prim2      | DNA primase, p58 subunit                                                           |
| prkab1     | protein kinase, AMP-activated, beta 1 non-catalytic subunit                        |
| prkab2     | protein kinase, AMP-activated, beta 2 non-catalytic subunit                        |
| prkacb     | protein kinase, cAMP dependent, catalytic, beta                                    |
| prkag1     | protein kinase, AMP-activated, gamma 1 non-catalytic subunit                       |
| prkag2     | protein kinase, AMP-activated, gamma 2 non-catalytic subunit                       |
| prkag3     | protein kinase, AMP-activated, gamma 3 non-catalytic subunit                       |
| prkar1b    | protein kinase, cAMP dependent regulatory, type I beta                             |
| prkar1b-rs | protein kinase, cAMP dependent regulatory, type I beta, related sequence           |
| prkch      | protein kinase C, eta                                                              |
| prkcsh     | protein kinase C substrate 80K-H                                                   |
| prkd3      | protein kinase D3                                                                  |
| prl8a6     | prolactin family 8, subfamily a, member 6                                          |
| prosc      | proline synthetase co-transcribed                                                  |
| prpf39     | PRP39 pre-mRNA processing factor 39 homolog (yeast)                                |
| prpsap1    | phosphoribosyl pyrophosphate synthetase-associated protein 1                       |
| prpsap2    | predicted gene 13651; phosphoribosyl pyrophosphate synthetase-associated protein 2 |
| prr15      | proline rich 15                                                                    |
| prrg2      | proline-rich Gla (G-carboxyglutamic acid) polypeptide 2                            |
| prrg3      | proline rich Gla (G-carboxyglutamic acid) 3 (transmembrane)                        |
| prss22     | protease, serine, 22                                                               |
| psat1      | similar to Phosphoserine aminotransferase 1; phosphoserine aminotransferase 1      |
| pscd1      | cytohesin 1                                                                        |
| pscd2      | cytohesin 2                                                                        |
| pscd3      | cytohesin 3                                                                        |
| pscd4      | cytohesin 4                                                                        |
| pscdbp     | cytohesin 1 interacting protein                                                    |
| psd        | pleckstrin and Sec7 domain containing                                              |
| psd2       | pleckstrin and Sec7 domain containing 2                                            |
| psd4       | pleckstrin and Sec7 domain containing 4                                            |
| psma1      | proteasome (prosome, macropain) subunit, alpha type 1                              |
| psma2      | proteasome (prosome, macropain) subunit, alpha type 2                              |
| psma3      | proteasome (prosome, macropain) subunit, alpha type 3; predicted gene 5406         |
| psma4      | proteasome (prosome, macropain) subunit, alpha type 4; predicted gene 6542         |
| psma5      | proteasome (prosome, macropain) subunit, alpha type 5                              |
| psma8      | proteasome (prosome, macropain) subunit, alpha type, 8                             |
| psmb10     | proteasome (prosome, macropain) subunit, beta type 10                              |
| psmb11     | proteasome (prosome, macropain) subunit, beta type, 11                             |
| psmb2      | proteasome (prosome, macropain) subunit, beta type 2                               |
| psmb3      | proteasome (prosome, macropain) subunit, beta type 3                               |
| psmb4      | proteasome (prosome, macropain) subunit, beta type 4                               |
| psmb5      | predicted gene 3375; proteasome (prosome, macropain) subunit, beta type 5          |
| psmb6      | proteasome (prosome, macropain) subunit, beta type 6                               |
| psmb7      | proteasome (prosome, macropain) subunit, beta type 7                               |
| psmb7-ps1  | proteasome (prosome, macropain) subunit, beta type 7, pseudogene 1                 |
| psmc1-rs1  | protease (prosome, macropain) 26S subunit, ATPase 1, related sequence 1            |
| psme1      | predicted gene 7776; proteasome (prosome, macropain) 28 subunit, alpha             |

|            |                                                                                                                                                                                                                                                                                                                                                  |
|------------|--------------------------------------------------------------------------------------------------------------------------------------------------------------------------------------------------------------------------------------------------------------------------------------------------------------------------------------------------|
| psme1-ps1  | protease (prosome, macropain) 28 subunit, alpha, pseudogene 1                                                                                                                                                                                                                                                                                    |
| psme2      | protease (prosome, macropain) 28 subunit beta B, pseudogene; similar to Proteasome activator complex subunit 2 (Proteasome activator 28-beta subunit) (PA28beta) (PA28b) (Activator of multicatalytic protease subunit 2) (11S regulator complex beta subunit) (REG-beta); proteasome (prosome, macropain) 28 subunit, beta; predicted gene 7928 |
| psme2b-ps  | protease (prosome, macropain) 28 subunit beta B, pseudogene; similar to Proteasome activator complex subunit 2 (Proteasome activator 28-beta subunit) (PA28beta) (PA28b) (Activator of multicatalytic protease subunit 2) (11S regulator complex beta subunit) (REG-beta); proteasome (prosome, macropain) 28 subunit, beta; predicted gene 7928 |
| psme2-ps1  | protease (prosome, macropain) 28 subunit, beta, b, pseudogene 1                                                                                                                                                                                                                                                                                  |
| psme2-ps2  | protease (prosome, macropain) 28 subunit, beta, b, pseudogene 2                                                                                                                                                                                                                                                                                  |
| psme3      | proteasome (prosome, macropain) 28 subunit, 3                                                                                                                                                                                                                                                                                                    |
| psme4      | proteasome (prosome, macropain) activator subunit 4                                                                                                                                                                                                                                                                                              |
| psmg1      | proteasome (prosome, macropain) assembly chaperone 1                                                                                                                                                                                                                                                                                             |
| psmg2      | proteasome (prosome, macropain) assembly chaperone 2; similar to Clast3 protein                                                                                                                                                                                                                                                                  |
| psmg3      | proteasome (prosome, macropain) assembly chaperone 3                                                                                                                                                                                                                                                                                             |
| ptcd3      | pentatricopeptide repeat domain 3                                                                                                                                                                                                                                                                                                                |
| ptcra      | pre T-cell antigen receptor alpha                                                                                                                                                                                                                                                                                                                |
| ptgr2      | prostaglandin reductase 2                                                                                                                                                                                                                                                                                                                        |
| ptms       | parathymosin                                                                                                                                                                                                                                                                                                                                     |
| ptplad1    | protein tyrosine phosphatase-like A domain containing 1                                                                                                                                                                                                                                                                                          |
| ptplb      | predicted gene 7908; protein tyrosine phosphatase-like (proline instead of catalytic arginine), member b                                                                                                                                                                                                                                         |
| ptprb      | protein tyrosine phosphatase, receptor type, B                                                                                                                                                                                                                                                                                                   |
| ptprg      | protein tyrosine phosphatase, receptor type, G; similar to protein tyrosine phosphatase, receptor type, G                                                                                                                                                                                                                                        |
| ptrh1      | peptidyl-tRNA hydrolase 1 homolog ( <i>S. cerevisiae</i> )                                                                                                                                                                                                                                                                                       |
| purb       | purine rich element binding protein B                                                                                                                                                                                                                                                                                                            |
| pwp1       | PWP1 homolog ( <i>S. cerevisiae</i> )                                                                                                                                                                                                                                                                                                            |
| pxmp4      | peroxisomal membrane protein 4                                                                                                                                                                                                                                                                                                                   |
| pzp        | pregnancy zone protein                                                                                                                                                                                                                                                                                                                           |
| qsm        | Qa1 structure modifier                                                                                                                                                                                                                                                                                                                           |
| qtrt1      | queuine tRNA-ribosyltransferase 1                                                                                                                                                                                                                                                                                                                |
| qtrtd1     | queuine tRNA-ribosyltransferase domain containing 1                                                                                                                                                                                                                                                                                              |
| rab1       | RAB1, member RAS oncogene family                                                                                                                                                                                                                                                                                                                 |
| rab10      | RAB10, member RAS oncogene family                                                                                                                                                                                                                                                                                                                |
| rab11a     | RAB11a, member RAS oncogene family                                                                                                                                                                                                                                                                                                               |
| rab11b     | RAB11B, member RAS oncogene family                                                                                                                                                                                                                                                                                                               |
| rab11b-ps1 | RAB11b, member RAS oncogene family, pseudogene 1                                                                                                                                                                                                                                                                                                 |
| rab11fip1  | RAB11 family interacting protein 1 (class I)                                                                                                                                                                                                                                                                                                     |
| rab11fip2  | RAB11 family interacting protein 2 (class I)                                                                                                                                                                                                                                                                                                     |
| rab11fip3  | RAB11 family interacting protein 3 (class II)                                                                                                                                                                                                                                                                                                    |
| rab11fip4  | RAB11 family interacting protein 4 (class II)                                                                                                                                                                                                                                                                                                    |
| rab11fip5  | RAB11 family interacting protein 5 (class I)                                                                                                                                                                                                                                                                                                     |
| rab12      | RAB12, member RAS oncogene family                                                                                                                                                                                                                                                                                                                |
| rab13      | RAB13, member RAS oncogene family                                                                                                                                                                                                                                                                                                                |
| rab14      | RAB14, member RAS oncogene family                                                                                                                                                                                                                                                                                                                |
| rab15      | RAB15, member RAS oncogene family                                                                                                                                                                                                                                                                                                                |
| rab17      | RAB17, member RAS oncogene family; similar to RAB17, member RAS oncogene family                                                                                                                                                                                                                                                                  |
| rab18      | RAB18, member RAS oncogene family                                                                                                                                                                                                                                                                                                                |
| rab19      | RAB19, member RAS oncogene family                                                                                                                                                                                                                                                                                                                |
| rab1b      | RAB1B, member RAS oncogene family                                                                                                                                                                                                                                                                                                                |
| rab20      | RAB20, member RAS oncogene family                                                                                                                                                                                                                                                                                                                |
| rab21      | RAB21, member RAS oncogene family                                                                                                                                                                                                                                                                                                                |
| rab22a     | RAB22A, member RAS oncogene family                                                                                                                                                                                                                                                                                                               |
| rab24      | RAB24, member RAS oncogene family                                                                                                                                                                                                                                                                                                                |
| rab25      | RAB25, member RAS oncogene family                                                                                                                                                                                                                                                                                                                |
| rab26      | RAB26, member RAS oncogene family                                                                                                                                                                                                                                                                                                                |



|          |                                                                                                                                                                                             |
|----------|---------------------------------------------------------------------------------------------------------------------------------------------------------------------------------------------|
| rab28    | RAB28, member RAS oncogene family                                                                                                                                                           |
| rab2a    | predicted gene 5865; RAB2A, member RAS oncogene family                                                                                                                                      |
| rab2b    | RAB2B, member RAS oncogene family                                                                                                                                                           |
| rab30    | RAB30, member RAS oncogene family                                                                                                                                                           |
| rab31    | RAB31, member RAS oncogene family                                                                                                                                                           |
| rab32    | RAB32, member RAS oncogene family                                                                                                                                                           |
| rab33a   | RAB33A, member of RAS oncogene family                                                                                                                                                       |
| rab33b   | RAB33B, member of RAS oncogene family                                                                                                                                                       |
| rab34    | RAB34, member of RAS oncogene family                                                                                                                                                        |
| rab35    | RAB35, member RAS oncogene family                                                                                                                                                           |
| rab37    | RAB37, member of RAS oncogene family                                                                                                                                                        |
| rab39b   | RAB39B, member RAS oncogene family                                                                                                                                                          |
| rab3a    | RAB3A, member RAS oncogene family                                                                                                                                                           |
| rab3b    | RAB3B, member RAS oncogene family                                                                                                                                                           |
| rab3c    | similar to RAB3C, member RAS oncogene family; RAB3C, member RAS oncogene family                                                                                                             |
| rab3d    | RAB3D, member RAS oncogene family                                                                                                                                                           |
| rab3gap1 | RAB3 GTPase activating protein subunit 1                                                                                                                                                    |
| rab3gap2 | RAB3 GTPase activating protein subunit 2                                                                                                                                                    |
| rab3il1  | RAB3A interacting protein (rabin3)-like 1                                                                                                                                                   |
| rab3ip   | RAB3A interacting protein                                                                                                                                                                   |
| rab40c   | Rab40c, member RAS oncogene family                                                                                                                                                          |
| rab43    | RAB43, member RAS oncogene family                                                                                                                                                           |
| rab4a    | RAB4A, member RAS oncogene family                                                                                                                                                           |
| rab5a    | RAB5A, member RAS oncogene family; similar to small GTP-binding protein rab5                                                                                                                |
| rab5b    | RAB5B, member RAS oncogene family; predicted gene 13991; similar to RAB5B, member RAS oncogene family                                                                                       |
| rab5c    | RAB5C, member RAS oncogene family                                                                                                                                                           |
| rab6     | similar to Rab6 protein; predicted gene 13082; RAB6, member RAS oncogene family                                                                                                             |
| rab6b    | RAB6B, member RAS oncogene family                                                                                                                                                           |
| rab6ip1  | DENN/MADD domain containing 5A                                                                                                                                                              |
| rab7     | RAB7, member RAS oncogene family                                                                                                                                                            |
| rab7l1   | RAB7, member RAS oncogene family-like 1                                                                                                                                                     |
| rab8a    | RAB8A, member RAS oncogene family                                                                                                                                                           |
| rab8b    | RAB8B, member RAS oncogene family                                                                                                                                                           |
| rab9     | RAB9, member RAS oncogene family; predicted gene 9181                                                                                                                                       |
| rab9b    | RAB9B, member RAS oncogene family                                                                                                                                                           |
| rabac1   | Rab acceptor 1 (prenylated)                                                                                                                                                                 |
| rabep1   | rabaptin, RAB GTPase binding effector protein 1                                                                                                                                             |
| rabgap1  | RAB GTPase activating protein 1                                                                                                                                                             |
| rabgef1  | similar to Ras negative regulator Rabex-5/Rin2; RAB guanine nucleotide exchange factor (GEF) 1                                                                                              |
| rabggt   | Rab geranylgeranyl transferase, a subunit                                                                                                                                                   |
| rabggtb  | RAB geranylgeranyl transferase, b subunit                                                                                                                                                   |
| rabif    | RAB interacting factor                                                                                                                                                                      |
| rabl2a   | RAB, member of RAS oncogene family-like 2A                                                                                                                                                  |
| rac2     | RAS-related C3 botulinum substrate 2                                                                                                                                                        |
| rac3     | RAS-related C3 botulinum substrate 3                                                                                                                                                        |
| racgap1  | Rac GTPase-activating protein 1; predicted gene 1859                                                                                                                                        |
| raet1a   | retinoic acid early transcript 1E; retinoic acid early transcript beta; retinoic acid early transcript 1, alpha; retinoic acid early transcript delta; retinoic acid early transcript gamma |
| raet1b   | retinoic acid early transcript 1E; retinoic acid early transcript beta; retinoic acid early transcript 1, alpha; retinoic acid early transcript delta; retinoic acid early transcript gamma |
| raet1c   | retinoic acid early transcript 1E; retinoic acid early transcript beta; retinoic acid early transcript 1, alpha; retinoic acid early transcript delta; retinoic acid early transcript gamma |
| rai14    | retinoic acid induced 14                                                                                                                                                                    |
| rala     | v-ral simian leukemia viral oncogene homolog A (ras related)                                                                                                                                |
| ralb     | v-ral simian leukemia viral oncogene homolog B (ras related)                                                                                                                                |

|          |                                                                                                                                                                     |
|----------|---------------------------------------------------------------------------------------------------------------------------------------------------------------------|
| ralbp1   | ralA binding protein 1                                                                                                                                              |
| ralgds   | ral guanine nucleotide dissociation stimulator                                                                                                                      |
| ralgps1  | Ral GEF with PH domain and SH3 binding motif 1                                                                                                                      |
| ralgps2  | Ral GEF with PH domain and SH3 binding motif 2                                                                                                                      |
| ralyl    | RALY RNA binding protein-like                                                                                                                                       |
| ranbp1   | RAN binding protein 1                                                                                                                                               |
| ranbp10  | RAN binding protein 10                                                                                                                                              |
| ranbp17  | RAN binding protein 17                                                                                                                                              |
| ranbp3   | RAN binding protein 3                                                                                                                                               |
| rangrf   | predicted gene 7791; similar to Ran-interacting protein MOG1; predicted gene 15711; RAN guanine nucleotide release factor; predicted gene 4535; predicted gene 8572 |
| rap1a    | predicted gene 9392; similar to Raichu404X; RAS-related protein-1a                                                                                                  |
| rap1b    | RAS related protein 1b; similar to GTP-binding protein (smg p21B)                                                                                                   |
| rap1gap  | Rap1 GTPase-activating protein                                                                                                                                      |
| rap1gds1 | similar to RAP1, GTP-GDP dissociation stimulator 1; RAP1, GTP-GDP dissociation stimulator 1                                                                         |
| rap2a    | RAS related protein 2a                                                                                                                                              |
| rap2b    | RAP2B, member of RAS oncogene family                                                                                                                                |
| rap2c    | similar to RAP2C, member of RAS oncogene family; RAP2C, member of RAS oncogene family                                                                               |
| rapgef1  | Rap guanine nucleotide exchange factor (GEF) 1                                                                                                                      |
| rapgef2  | Rap guanine nucleotide exchange factor (GEF) 2                                                                                                                      |
| rapgef3  | Rap guanine nucleotide exchange factor (GEF) 3                                                                                                                      |
| rapgef4  | Rap guanine nucleotide exchange factor (GEF) 4                                                                                                                      |
| rapgef5  | Rap guanine nucleotide exchange factor (GEF) 5                                                                                                                      |
| rapgef6  | Rap guanine nucleotide exchange factor (GEF) 6                                                                                                                      |
| rapgef11 | Rap guanine nucleotide exchange factor (GEF)-like 1                                                                                                                 |
| rarg     | retinoic acid receptor, gamma                                                                                                                                       |
| rars     | arginyl-tRNA synthetase                                                                                                                                             |
| ras      | resistance to audiogenic seizures                                                                                                                                   |
| rasa2    | RAS p21 protein activator 2                                                                                                                                         |
| rasa3    | RAS p21 protein activator 3                                                                                                                                         |
| rasa4    | RAS p21 protein activator 4                                                                                                                                         |
| rasal1   | RAS protein activator like 1 (GAP1 like)                                                                                                                            |
| rasal2   | RAS protein activator like 2                                                                                                                                        |
| rasd1    | RAS, dexamethasone-induced 1                                                                                                                                        |
| rasd2    | RASD family, member 2                                                                                                                                               |
| rasgef1b | RasGEF domain family, member 1B; hypothetical protein LOC100044232                                                                                                  |
| rasgrf1  | RAS protein-specific guanine nucleotide-releasing factor 1                                                                                                          |
| rasgrf2  | RAS protein-specific guanine nucleotide-releasing factor 2                                                                                                          |
| rasgrp1  | RAS guanyl releasing protein 1                                                                                                                                      |
| rasgrp2  | RAS, guanyl releasing protein 2                                                                                                                                     |
| rasgrp3  | RAS, guanyl releasing protein 3                                                                                                                                     |
| rasgrp4  | RAS guanyl releasing protein 4                                                                                                                                      |
| rasl10a  | RAS-like, family 10, member A                                                                                                                                       |
| rasl10b  | RAS-like, family 10, member B                                                                                                                                       |
| rasl11a  | RAS-like, family 11, member A                                                                                                                                       |
| rasl11b  | RAS-like, family 11, member B                                                                                                                                       |
| rasl2-1  | RAS-like, family 2, locus 1                                                                                                                                         |
| rasl2-9  | RAS-like, family 2, locus 9; RAN, member RAS oncogene family; similar to RAN, member RAS oncogene family                                                            |
| rassf5   | Ras association (RalGDS/AF-6) domain family member 5                                                                                                                |
| rbj      | DnaJ (Hsp40) homolog, subfamily C, member 27                                                                                                                        |
| rbm12    | RNA binding motif protein 12                                                                                                                                        |
| rbm15b   | RNA binding motif protein 15B                                                                                                                                       |
| rbm22    | RNA binding motif protein 22                                                                                                                                        |
| rbm26    | RNA binding motif protein 26                                                                                                                                        |

|             |                                                                                       |
|-------------|---------------------------------------------------------------------------------------|
| rbm27       | RNA binding motif protein 27                                                          |
| rbms2       | RNA binding motif, single stranded interacting protein 2                              |
| rbmy1a1-rs1 | RNA binding motif protein, Y chromosome, family 1, member A1, related sequence 1      |
| rc3h2       | ring finger and CCCH-type zinc finger domains 2                                       |
| rcbtb1      | regulator of chromosome condensation (RCC1) and BTB (POZ) domain containing protein 1 |
| rcbtb2      | regulator of chromosome condensation (RCC1) and BTB (POZ) domain containing protein 2 |
| rcc1        | regulator of chromosome condensation 1                                                |
| rce1        | RCE1 homolog, prenyl protein peptidase ( <i>S. cerevisiae</i> )                       |
| rcl1        | RNA terminal phosphate cyclase-like 1                                                 |
| rcn1        | reticulocalbin 1                                                                      |
| reg2        | regenerating islet-derived 2                                                          |
| reg3a       | regenerating islet-derived 3 alpha                                                    |
| reg3g       | regenerating islet-derived 3 gamma                                                    |
| rell1       | RELT-like 1                                                                           |
| rell2       | RELT-like 2                                                                           |
| rem1        | rad and gem related GTP binding protein 1                                             |
| rem2        | rad and gem related GTP binding protein 2                                             |
| reps1       | RalBP1 associated Eps domain containing protein                                       |
| reps2       | RALBP1 associated Eps domain containing protein 2                                     |
| reg         | RAS-like, estrogen-regulated, growth-inhibitor                                        |
| rexo1       | REX1, RNA exonuclease 1 homolog ( <i>S. cerevisiae</i> )                              |
| rgl1        | ral guanine nucleotide dissociation stimulator,-like 1                                |
| rgl2        | ral guanine nucleotide dissociation stimulator-like 2                                 |
| rgl3        | ral guanine nucleotide dissociation stimulator-like 3                                 |
| rgnef       | Rho-guanine nucleotide exchange factor                                                |
| rgs1        | regulator of G-protein signaling 1                                                    |
| rgs10       | regulator of G-protein signalling 10                                                  |
| rgs11       | regulator of G-protein signaling 11; similar to regulator of G-protein signaling 11   |
| rgs12       | regulator of G-protein signaling 12                                                   |
| rgs13       | regulator of G-protein signaling 13                                                   |
| rgs14       | regulator of G-protein signaling 14                                                   |
| rgs16       | regulator of G-protein signaling 16                                                   |
| rgs17       | regulator of G-protein signaling 17                                                   |
| rgs18       | regulator of G-protein signaling 18                                                   |
| rgs19       | regulator of G-protein signaling 19; similar to Regulator of G-protein signaling 19   |
| rgs2        | regulator of G-protein signaling 2                                                    |
| rgs20       | regulator of G-protein signalling 20                                                  |
| rgs22       | regulator of G-protein signalling 22                                                  |
| rgs3        | regulator of G-protein signaling 3                                                    |
| rgs4        | regulator of G-protein signaling 4                                                    |
| rgs5        | regulator of G-protein signaling 5                                                    |
| rgs6        | regulator of G-protein signaling 6                                                    |
| rgs7        | regulator of G protein signaling 7                                                    |
| rgs7bp      | regulator of G-protein signalling 7 binding protein                                   |
| rgs8        | regulator of G-protein signaling 8                                                    |
| rgs9        | regulator of G-protein signaling 9                                                    |
| rgs9bp      | regulator of G-protein signalling 9 binding protein                                   |
| rhd1        | rhomboid, veinlet-like 1 ( <i>Drosophila</i> )                                        |
| rheb        | Ras homolog enriched in brain; similar to RAS-homolog enriched in brain               |
| rhebl1      | Ras homolog enriched in brain like 1                                                  |
| rhob        | ras homolog gene family, member B                                                     |
| rhobtb1     | Rho-related BTB domain containing 1                                                   |
| rhobtb3     | Rho-related BTB domain containing 3                                                   |
| rhoc        | ras homolog gene family, member C                                                     |
| rhod        | ras homolog gene family, member D                                                     |

|           |                                                                                                                                                                  |
|-----------|------------------------------------------------------------------------------------------------------------------------------------------------------------------|
| rhof      | ras homolog gene family, member f                                                                                                                                |
| rhog      | ras homolog gene family, member G                                                                                                                                |
| rhoh      | ras homolog gene family, member H                                                                                                                                |
| rhoj      | ras homolog gene family, member J                                                                                                                                |
| rhoq      | ras homolog gene family, member Q                                                                                                                                |
| rhot1     | ras homolog gene family, member T1                                                                                                                               |
| rhot2     | ras homolog gene family, member T2                                                                                                                               |
| rhov      | ras homolog gene family, member U                                                                                                                                |
| rhov      | ras homolog gene family, member V                                                                                                                                |
| rhpn1     | rhophilin, Rho GTPase binding protein 1                                                                                                                          |
| rhpn2     | rhophilin, Rho GTPase binding protein 2                                                                                                                          |
| ribc2     | RIB43A domain with coiled-coils 2                                                                                                                                |
| ric8      | resistance to inhibitors of cholinesterase 8 homolog (C. elegans)                                                                                                |
| ric8b     | resistance to inhibitors of cholinesterase 8 homolog B (C. elegans)                                                                                              |
| rimbp2    | RIMS binding protein 2                                                                                                                                           |
| rin1      | Ras and Rab interactor 1                                                                                                                                         |
| rin2      | similar to Ras and Rab interactor 2; Ras and Rab interactor 2                                                                                                    |
| rin3      | Ras and Rab interactor 3                                                                                                                                         |
| riok1     | RIO kinase 1 (yeast)                                                                                                                                             |
| riok2     | RIO kinase 2 (yeast)                                                                                                                                             |
| riok3     | RIO kinase 3 (yeast)                                                                                                                                             |
| rip       | regulation of phenobarbitol-inducible P450                                                                                                                       |
| ripk4     | receptor-interacting serine-threonine kinase 4                                                                                                                   |
| ripr      | repression of phenobarbitol-inducible P450                                                                                                                       |
| rit1      | Ras-like without CAAX 1                                                                                                                                          |
| rit2      | Ras-like without CAAX 2                                                                                                                                          |
| rlbp111   | rearranged L-myc fusion sequence                                                                                                                                 |
| rlf       | rearranged L-myc fusion sequence                                                                                                                                 |
| rmcs2     | histocompatibility 2, class II antigen A, beta 1; response to metastatic cancers 2; similar to H-2 class II histocompatibility antigen, A-D beta chain precursor |
| rmnd5a    | similar to required for meiotic nuclear division 5 homolog A; required for meiotic nuclear division 5 homolog A (S. cerevisiae)                                  |
| rn18s-rs4 | 18s RNA, related sequence 4                                                                                                                                      |
| rnase10   | ribonuclease, RNase A family, 10 (non-active)                                                                                                                    |
| rnase9    | ribonuclease, RNase A family, 9 (non-active)                                                                                                                     |
| rnaset2b  | ribonuclease T2B; ribonuclease T2A                                                                                                                               |
| rnd1      | Rho family GTPase 1                                                                                                                                              |
| rnd2      | Rho family GTPase 2; predicted gene 4768                                                                                                                         |
| rnd3      | Rho family GTPase 3                                                                                                                                              |
| rnf10     | ring finger protein 10                                                                                                                                           |
| rnf112    | ring finger protein 112                                                                                                                                          |
| rnf113a2  | ring finger protein 113A2                                                                                                                                        |
| rnf114    | ring finger protein 114                                                                                                                                          |
| rnf122    | ring finger protein 122                                                                                                                                          |
| rnf141    | predicted gene 10179; ring finger protein 141                                                                                                                    |
| rnf144a   | ring finger protein 144A                                                                                                                                         |
| rnf151    | ring finger protein 151                                                                                                                                          |
| rnf181    | ring finger protein 181                                                                                                                                          |
| rnf38     | ring finger protein 38                                                                                                                                           |
| rnpc3     | RNA-binding region (RNP1, RRM) containing 3                                                                                                                      |
| rnu1-ps1  | U1 small nuclear RNA pseudogene 1                                                                                                                                |
| rnu5g     | RNA, U5G small nuclear                                                                                                                                           |
| rod1      | ROD1 regulator of differentiation 1 (S. pombe)                                                                                                                   |
| ropn1     | ropporin, rhophilin associated protein 1                                                                                                                         |
| rorb      | hypothetical protein LOC100047843; RAR-related orphan receptor beta                                                                                              |

|                |                                                                                                                                                                                                                                                                                                                                                                                                                                                                                               |
|----------------|-----------------------------------------------------------------------------------------------------------------------------------------------------------------------------------------------------------------------------------------------------------------------------------------------------------------------------------------------------------------------------------------------------------------------------------------------------------------------------------------------|
| rorc           | RAR-related orphan receptor gamma                                                                                                                                                                                                                                                                                                                                                                                                                                                             |
| rp23-433p19.11 | serine incorporator 4                                                                                                                                                                                                                                                                                                                                                                                                                                                                         |
| rpain          | RPA interacting protein                                                                                                                                                                                                                                                                                                                                                                                                                                                                       |
| rpl10a         | predicted gene 13573; predicted gene 15451; ribosomal protein L10A; predicted gene 7695; similar to ribosomal protein L10a                                                                                                                                                                                                                                                                                                                                                                    |
| rpl12          | similar to ribosomal protein L12; predicted gene 7117; small nucleolar RNA, H/ACA box 65; predicted gene 11425; predicted gene 6285; predicted gene 5962; predicted gene 9396; similar to 60S ribosomal protein L12; ribosomal protein L12; predicted gene 6336                                                                                                                                                                                                                               |
| rpl14          | predicted gene 9811; ribosomal protein L14                                                                                                                                                                                                                                                                                                                                                                                                                                                    |
| rpl17          | predicted gene 8081; similar to Ribosomal protein L17; similar to Rpl17 protein; predicted gene 10164; similar to 60S ribosomal protein L17 (L23) (Amino acid starvation-induced protein) (ASI); predicted gene 3800; predicted gene 10294; predicted gene 10223; predicted gene 7299; predicted gene 10362; predicted gene 8358; predicted gene 8371; ribosomal protein L17; similar to hCG24487; predicted gene 8776                                                                        |
| rpl23a         | predicted gene 3174; predicted gene 8112; predicted gene 8158; ribosomal protein L23a; predicted gene 5384; predicted gene 8264; predicted gene 6233; similar to 60S ribosomal protein L23a; predicted gene 7413; predicted gene 5351; predicted gene 6177; similar to ribosomal protein L23a; predicted gene 7065; predicted gene 7755; predicted gene 10335; predicted gene 8137; predicted gene 3362; predicted gene 10132; predicted gene 6118                                            |
| rpl26          | ribosomal protein L26; predicted gene 15772; predicted gene 9197; predicted gene 13268; predicted gene 11826; predicted gene 8253; predicted gene 7606                                                                                                                                                                                                                                                                                                                                        |
| rpl27a         | predicted gene 14439; predicted gene 8213; predicted gene 13981; predicted gene 8451; predicted gene 6378; predicted gene 8667; predicted gene 4923; predicted gene 5908; ribosomal protein L27a; predicted gene 14044; predicted gene 7536; predicted gene 14407                                                                                                                                                                                                                             |
| rpl28          | predicted gene 13226; predicted gene 15435; ribosomal protein L28; predicted gene 12938                                                                                                                                                                                                                                                                                                                                                                                                       |
| rpl31          | predicted gene 10191; predicted gene 7689; predicted gene 9401; similar to ribosomal protein L31; hypothetical protein LOC675768; predicted gene 13004; predicted gene 9228; predicted gene 10072; predicted gene 5437; predicted gene 9154; ribosomal protein L31; predicted gene 6670; predicted gene 8759                                                                                                                                                                                  |
| rpl32p         | ribosomal protein L32 pseudogene                                                                                                                                                                                                                                                                                                                                                                                                                                                              |
| rpl32-ps       | ribosomal protein L32, pseudogene                                                                                                                                                                                                                                                                                                                                                                                                                                                             |
| rpl35          | ribosomal protein L35; predicted gene 10269; predicted gene 8444; predicted gene 2000; predicted gene 4342                                                                                                                                                                                                                                                                                                                                                                                    |
| rpl36a         | predicted gene 8697; similar to large subunit ribosomal protein L36a; predicted gene 11970; predicted gene 10077; similar to ribosomal protein L36a; predicted gene 2718; predicted gene 10316; predicted gene 8001; predicted gene 6525; predicted gene 9409; ribosomal protein L36A; ribosomal protein L36A-like                                                                                                                                                                            |
| rpl37          | ribosomal protein L37                                                                                                                                                                                                                                                                                                                                                                                                                                                                         |
| rpl37a         | ribosomal protein L37a; predicted gene 4149; predicted gene 4613; predicted gene 14251; predicted gene 14173                                                                                                                                                                                                                                                                                                                                                                                  |
| rpl39          | predicted gene 15148; ribosomal protein L39; predicted gene 12013                                                                                                                                                                                                                                                                                                                                                                                                                             |
| rpl41          | ribosomal protein L41; predicted gene 3699                                                                                                                                                                                                                                                                                                                                                                                                                                                    |
| rpl8           | ribosomal protein L8; similar to 60S ribosomal protein L8                                                                                                                                                                                                                                                                                                                                                                                                                                     |
| rpl9           | predicted gene 10117; similar to ribosomal protein L9; ribosomal protein L9; similar to 60S ribosomal protein L9; predicted gene 4600; predicted gene 6028; predicted gene 5451; predicted gene 14231; similar to Ribosomal protein L9; predicted gene 8662; predicted gene 10321; predicted gene 6450; predicted gene 8959                                                                                                                                                                   |
| rplag          | reduced platelet aggregation                                                                                                                                                                                                                                                                                                                                                                                                                                                                  |
| rpo1-1         | polymerase (RNA) I polypeptide C                                                                                                                                                                                                                                                                                                                                                                                                                                                              |
| rpo1-2         | polymerase (RNA) I polypeptide B                                                                                                                                                                                                                                                                                                                                                                                                                                                              |
| rpo1-3         | polymerase (RNA) I polypeptide D                                                                                                                                                                                                                                                                                                                                                                                                                                                              |
| rpo1-4         | polymerase (RNA) I polypeptide A, 194kDa                                                                                                                                                                                                                                                                                                                                                                                                                                                      |
| rpp21          | ribonuclease P 21 subunit (human)                                                                                                                                                                                                                                                                                                                                                                                                                                                             |
| rpp40          | ribonuclease P 40 subunit (human)                                                                                                                                                                                                                                                                                                                                                                                                                                                             |
| rpr1           | ribonuclease P RNA-like 1                                                                                                                                                                                                                                                                                                                                                                                                                                                                     |
| rpr2           | ribonuclease P RNA-like 3; ribonuclease P RNA component H1; ribonuclease P RNA-like 2; predicted gene 6093                                                                                                                                                                                                                                                                                                                                                                                    |
| rpr3           | ribonuclease P RNA-like 3; ribonuclease P RNA component H1; ribonuclease P RNA-like 2; predicted gene 6093                                                                                                                                                                                                                                                                                                                                                                                    |
| rps10          | ribosomal protein S10; predicted gene 9180                                                                                                                                                                                                                                                                                                                                                                                                                                                    |
| rps12          | predicted gene 16422; predicted gene 6646; ribosomal protein S12; predicted gene 12334; predicted gene 5642; predicted gene 14059; predicted gene 5462; predicted gene 7698; predicted gene 7586; similar to ribosomal protein S12; predicted gene 14958; predicted gene 15887; predicted gene 10063; predicted gene 7601; predicted gene 9153; predicted gene 7671; predicted gene 9122; similar to 40S ribosomal protein S12; predicted gene 7711; predicted gene 7567; predicted gene 7643 |

|          |                                                                                                                                                                                                                                                                                                                                                                                                                                |
|----------|--------------------------------------------------------------------------------------------------------------------------------------------------------------------------------------------------------------------------------------------------------------------------------------------------------------------------------------------------------------------------------------------------------------------------------|
| rps13    | similar to ribosomal protein S13; predicted gene 12270; predicted gene 6834; predicted gene 15483; predicted gene 6573; ribosomal protein S13; predicted gene 10159                                                                                                                                                                                                                                                            |
| rps15    | similar to 40S ribosomal protein S15 (RIG protein); predicted gene 6921; similar to insulinoma protein (rig); predicted gene 8460; predicted gene 7121; predicted gene 5781; predicted gene 5508; predicted gene 6867; ribosomal protein S15                                                                                                                                                                                   |
| rps16-ps | ribosomal protein S16, pseudogene                                                                                                                                                                                                                                                                                                                                                                                              |
| rps21    | predicted gene 5963; ribosomal protein S21                                                                                                                                                                                                                                                                                                                                                                                     |
| rps23    | predicted gene 8624; predicted gene 9701; predicted gene 8467; predicted gene 15450; ribosomal protein S23; similar to yeast ribosomal protein S28 homologue; predicted gene 5148; similar to ribosomal protein S23; predicted gene 10054                                                                                                                                                                                      |
| rps25    | similar to 40S ribosomal protein S25; predicted gene 6988; predicted gene 10206; ribosomal protein S25; predicted gene 6029; predicted gene 4963; predicted gene 7926; predicted gene 2225                                                                                                                                                                                                                                     |
| rps28    | similar to 40S ribosomal protein S28; predicted gene 10443; predicted gene 12943; predicted gene 13192; similar to ribosomal protein S28; predicted gene 10263; predicted gene 3511; ribosomal protein S28                                                                                                                                                                                                                     |
| rps29    | predicted gene 7079; predicted gene 7618; predicted gene 10126; predicted gene 10059; predicted gene 5735; similar to 40S ribosomal protein S29; predicted gene 2581; predicted gene 6134; ribosomal protein S29; predicted gene 14303                                                                                                                                                                                         |
| rps6kc1  | ribosomal protein S6 kinase polypeptide 1                                                                                                                                                                                                                                                                                                                                                                                      |
| rps7     | similar to 40S ribosomal protein S7 (S8); predicted gene 6252; predicted gene 5055; predicted gene 4761; ribosomal protein S7; predicted gene 7351; predicted gene 6472                                                                                                                                                                                                                                                        |
| rps9     | ribosomal protein S9; predicted gene 5905                                                                                                                                                                                                                                                                                                                                                                                      |
| rpsa     | predicted gene 9323; predicted gene 7516; ribosomal protein SA pseudogene; predicted gene 9819; predicted gene 6339; predicted gene 9083; ribosomal protein SA; predicted gene 13374; predicted gene 12595; similar to laminin receptor 1 (ribosomal protein SA); predicted gene 13208; predicted gene 12113; predicted gene 5498; similar to 40S ribosomal protein SA (p40) (34/67 kDa laminin receptor); predicted gene 7549 |
| rrad     | Ras-related associated with diabetes                                                                                                                                                                                                                                                                                                                                                                                           |
| rraga    | Ras-related GTP binding A                                                                                                                                                                                                                                                                                                                                                                                                      |
| rragb    | Ras-related GTP binding B                                                                                                                                                                                                                                                                                                                                                                                                      |
| rragc    | Ras-related GTP binding C                                                                                                                                                                                                                                                                                                                                                                                                      |
| rragd    | Ras-related GTP binding D                                                                                                                                                                                                                                                                                                                                                                                                      |
| rras     | Harvey rat sarcoma oncogene, subgroup R                                                                                                                                                                                                                                                                                                                                                                                        |
| rras2    | related RAS viral (r-ras) oncogene homolog 2                                                                                                                                                                                                                                                                                                                                                                                   |
| rrm2-ps1 | ribonucleotide reductase M2 pseudogene 1                                                                                                                                                                                                                                                                                                                                                                                       |
| rrp15    | ribosomal RNA processing 15 homolog ( <i>S. cerevisiae</i> )                                                                                                                                                                                                                                                                                                                                                                   |
| rrt1     | retinoic acid regulated transcript 1                                                                                                                                                                                                                                                                                                                                                                                           |
| rrt1os   | retinoic acid regulated transcript 1 opposite strand transcription unit                                                                                                                                                                                                                                                                                                                                                        |
| rrt2     | retinoic acid regulated transcript 2                                                                                                                                                                                                                                                                                                                                                                                           |
| rrt3     | retinoic acid regulated transcript 3                                                                                                                                                                                                                                                                                                                                                                                           |
| rsu1     | Ras suppressor protein 1                                                                                                                                                                                                                                                                                                                                                                                                       |
| rtcd1    | RNA terminal phosphate cyclase domain 1                                                                                                                                                                                                                                                                                                                                                                                        |
| rtkn     | rhotekin                                                                                                                                                                                                                                                                                                                                                                                                                       |
| rufy1    | RUN and FYVE domain containing 1                                                                                                                                                                                                                                                                                                                                                                                               |
| rufy2    | RUN and FYVE domain-containing 2                                                                                                                                                                                                                                                                                                                                                                                               |
| rundc3a  | RUN domain containing 3A                                                                                                                                                                                                                                                                                                                                                                                                       |
| rusc2    | RUN and SH3 domain containing 2                                                                                                                                                                                                                                                                                                                                                                                                |
| rwdd1    | predicted gene 12693; RWD domain containing 1; predicted gene 13743                                                                                                                                                                                                                                                                                                                                                            |
| rxrb     | retinoid X receptor beta                                                                                                                                                                                                                                                                                                                                                                                                       |
| rxrg     | retinoid X receptor gamma                                                                                                                                                                                                                                                                                                                                                                                                      |
| s100a16  | S100 calcium binding protein A16                                                                                                                                                                                                                                                                                                                                                                                               |
| s100z    | S100 calcium binding protein, zeta                                                                                                                                                                                                                                                                                                                                                                                             |
| sacm11   | SAC1 (suppressor of actin mutations 1, homolog)-like ( <i>S. cerevisiae</i> )                                                                                                                                                                                                                                                                                                                                                  |
| samd11   | sterile alpha motif domain containing 11                                                                                                                                                                                                                                                                                                                                                                                       |
| samd9l   | sterile alpha motif domain containing 9-like                                                                                                                                                                                                                                                                                                                                                                                   |
| sap30bp  | similar to transcriptional regulator protein; SAP30 binding protein                                                                                                                                                                                                                                                                                                                                                            |
| saps1    | SAPS domain family, member 1                                                                                                                                                                                                                                                                                                                                                                                                   |
| saps3    | SAPS domain family, member 3                                                                                                                                                                                                                                                                                                                                                                                                   |
| sar1a    | SAR1 gene homolog A ( <i>S. cerevisiae</i> )                                                                                                                                                                                                                                                                                                                                                                                   |
| sar1b    | SAR1 gene homolog B ( <i>S. cerevisiae</i> )                                                                                                                                                                                                                                                                                                                                                                                   |

|            |                                                                                                                               |
|------------|-------------------------------------------------------------------------------------------------------------------------------|
| sarb       | SAR1b gene homolog ( <i>S. cerevisiae</i> )                                                                                   |
| sas2       | serum antigenic substance 2                                                                                                   |
| sav1       | similar to WW45 protein; salvador homolog 1 ( <i>Drosophila</i> )                                                             |
| sbk1       | SH3-binding kinase 1                                                                                                          |
| sc4mol     | sterol-C4-methyl oxidase-like                                                                                                 |
| scamp4     | secretory carrier membrane protein 4                                                                                          |
| scand1     | SCAN domain-containing 1                                                                                                      |
| scn1b      | sodium channel, voltage-gated, type I, beta                                                                                   |
| scn2b      | sodium channel, voltage-gated, type II, beta                                                                                  |
| scn3b      | sodium channel, voltage-gated, type III, beta                                                                                 |
| scn4b      | sodium channel, type IV, beta                                                                                                 |
| scnn1d     | sodium channel, nonvoltage-gated 1, delta                                                                                     |
| scoc       | short coiled-coil protein                                                                                                     |
| sdad1      | SDA1 domain containing 1; similar to SDA1 domain containing 1                                                                 |
| sdccag8    | serologically defined colon cancer antigen 8                                                                                  |
| sdf2       | stromal cell derived factor 2                                                                                                 |
| sdf2l1     | stromal cell-derived factor 2-like 1                                                                                          |
| sec1       | secretory blood group 1                                                                                                       |
| sec14l1    | SEC14-like 1 ( <i>S. cerevisiae</i> )                                                                                         |
| sec14l3    | SEC14-like 3 ( <i>S. cerevisiae</i> )                                                                                         |
| sec14l4    | SEC14-like 4 ( <i>S. cerevisiae</i> )                                                                                         |
| sec16b     | SEC16 homolog B ( <i>S. cerevisiae</i> )                                                                                      |
| sec23b     | similar to SEC23B; SEC23B ( <i>S. cerevisiae</i> )                                                                            |
| sec24c     | Sec24 related gene family, member C ( <i>S. cerevisiae</i> )                                                                  |
| sec31b     | Sec31 homolog B ( <i>S. cerevisiae</i> )                                                                                      |
| sec61a1    | Sec61 alpha 1 subunit ( <i>S. cerevisiae</i> )                                                                                |
| sec61a2    | Sec61, alpha subunit 2 ( <i>S. cerevisiae</i> )                                                                               |
| sec61b     | Sec61 beta subunit; predicted gene 10320; predicted gene 5870; similar to protein translocation complex beta subunit          |
| sec61g     | predicted gene 11575; predicted gene 10177; predicted gene 4184; SEC61, gamma subunit; similar to Sec61-complex gamma-subunit |
| sec62      | SEC62 homolog ( <i>S. cerevisiae</i> )                                                                                        |
| sectm1a    | secreted and transmembrane 1A                                                                                                 |
| sectm1b    | secreted and transmembrane 1B                                                                                                 |
| sept10     | septin 10                                                                                                                     |
| sept11     | septin 11                                                                                                                     |
| sept12     | septin 12                                                                                                                     |
| sept6      | septin 6                                                                                                                      |
| sept7      | septin 7                                                                                                                      |
| sept8      | septin 8                                                                                                                      |
| sergef     | secretion regulating guanine nucleotide exchange factor                                                                       |
| serinc1    | serine incorporator 1                                                                                                         |
| serinc2    | serine incorporator 2; hypothetical protein LOC100044221                                                                      |
| serinc3    | serine incorporator 3                                                                                                         |
| serinc5    | serine incorporator 5                                                                                                         |
| serpina1a  | serine (or cysteine) peptidase inhibitor, clade A, member 1A                                                                  |
| serpina1b  | serine (or cysteine) peptidase inhibitor, clade A, member 1B                                                                  |
| serpina1c  | serine (or cysteine) peptidase inhibitor, clade A, member 1C                                                                  |
| serpina1d  | serine (or cysteine) peptidase inhibitor, clade A, member 1D                                                                  |
| serpina1f  | serine (or cysteine) peptidase inhibitor, clade A, member 1F                                                                  |
| serpina3k  | serine (or cysteine) peptidase inhibitor, clade A, member 3K                                                                  |
| serpina3kr | serine (or cysteine) peptidase inhibitor, clade A, member 3K regulator                                                        |
| serpina3m  | serine (or cysteine) peptidase inhibitor, clade A, member 3M                                                                  |
| sestd1     | SEC14 and spectrin domains 1; predicted gene 9165                                                                             |
| sf4        | splicing factor 4                                                                                                             |

|            |                                                                                                                        |
|------------|------------------------------------------------------------------------------------------------------------------------|
| sfrs18     | splicing factor, arginine/serine-rich 18                                                                               |
| sfxn2      | similar to Sideroflexin-2; sideroflexin 2                                                                              |
| sfxn4      | sideroflexin 4                                                                                                         |
| sgcb       | sarcoglycan, beta (dystrophin-associated glycoprotein)                                                                 |
| sgcg       | sarcoglycan, gamma (dystrophin-associated glycoprotein)                                                                |
| sgcz       | sarcoglycan zeta                                                                                                       |
| sgsm1      | small G protein signaling modulator 1                                                                                  |
| sgsm2      | small G protein signaling modulator 2                                                                                  |
| sgsm3      | small G protein signaling modulator 3                                                                                  |
| sh2d3c     | SH2 domain containing 3C                                                                                               |
| sh3bgrl    | SH3-binding domain glutamic acid-rich protein like                                                                     |
| sh3bgrl2   | SH3 domain binding glutamic acid-rich protein like 2                                                                   |
| sh3bp1     | similar to SH3-domain binding protein 1; SH3-domain binding protein 1; similar to SH3 domain-binding protein 1 (3BP-1) |
| sh3yl1     | Sh3 domain YSC-like 1                                                                                                  |
| shoc2      | soc-2 (suppressor of clear) homolog (C. elegans)                                                                       |
| sidt1      | SID1 transmembrane family, member 1                                                                                    |
| sig        | sightless                                                                                                              |
| sipa1      | signal-induced proliferation associated gene 1                                                                         |
| sirpb1     | signal-regulatory protein beta 1                                                                                       |
| slc10a7    | solute carrier family 10 (sodium/bile acid cotransporter family), member 7                                             |
| slc25a21   | solute carrier family 25 (mitochondrial oxodicarboxylate carrier), member 21                                           |
| slc25a41   | solute carrier family 25, member 41                                                                                    |
| slc33a1    | solute carrier family 33 (acetyl-CoA transporter), member 1                                                            |
| slc35a4    | predicted gene 5866; solute carrier family 35, member A4                                                               |
| slc35b2    | solute carrier family 35, member B2                                                                                    |
| slc39a12   | solute carrier family 39 (zinc transporter), member 12                                                                 |
| slc41a3    | solute carrier family 41, member 3                                                                                     |
| slc44a3    | solute carrier family 44, member 3                                                                                     |
| slfn4      | schlafen 4                                                                                                             |
| slfn9      | similar to putative protein; schlafen 9; similar to schlafen 9                                                         |
| slitrk2    | SLIT and NTRK-like family, member 2                                                                                    |
| slitrk4    | SLIT and NTRK-like family, member 4                                                                                    |
| sltm       | SAFB-like, transcription modulator                                                                                     |
| smad-ps1   | MAD homolog, pseudogene 1 (Drosophila)                                                                                 |
| smap1      | stromal membrane-associated protein 1                                                                                  |
| smap2      | stromal membrane-associated GTPase-activating protein 2                                                                |
| smpdl3a    | sphingomyelin phosphodiesterase, acid-like 3A                                                                          |
| smu1       | smu-1 suppressor of mec-8 and unc-52 homolog (C. elegans)                                                              |
| snapc1     | small nuclear RNA activating complex, polypeptide 1                                                                    |
| snapc2     | small nuclear RNA activating complex, polypeptide 2                                                                    |
| snapc3     | small nuclear RNA activating complex, polypeptide 3                                                                    |
| snhg3      | small nucleolar RNA host gene (non-protein coding) 3                                                                   |
| snora74a   | small nucleolar RNA, H/ACA box 74A                                                                                     |
| snrp1c-ps1 | U1 small nuclear ribonucleoprotein 1C, pseudogene 1                                                                    |
| snrp1c-ps2 | U1 small nuclear ribonucleoprotein 1C, pseudogene 2                                                                    |
| snrp2a     | U2 small nuclear ribonucleoprotein polypeptide 2A                                                                      |
| snrpe-ps1  | small nuclear ribonucleoprotein E, pseudogene 1                                                                        |
| snrpe-ps2  | small nuclear ribonucleoprotein E, pseudogene 2                                                                        |
| snta1      | syntrophin, acidic 1                                                                                                   |
| sntb1      | syntrophin, basic 1                                                                                                    |
| sntb2      | similar to beta-2-syntrophin; syntrophin, basic 2                                                                      |
| sntg1      | syntrophin, gamma 1                                                                                                    |
| sntg2      | syntrophin, gamma 2                                                                                                    |
| snx13      | sorting nexin 13                                                                                                       |



|            |                                                                                                              |
|------------|--------------------------------------------------------------------------------------------------------------|
| snx21      | sorting nexin family member 21                                                                               |
| snx22      | sorting nexin 22                                                                                             |
| snx26      | Rho GTPase activating protein 33                                                                             |
| solh       | small optic lobes homolog (Drosophila)                                                                       |
| sos1       | son of sevenless homolog 1 (Drosophila)                                                                      |
| sos2       | son of sevenless homolog 2 (Drosophila)                                                                      |
| spata13    | spermatogenesis associated 13                                                                                |
| spata16    | spermatogenesis associated 16                                                                                |
| spata17    | spermatogenesis associated 17                                                                                |
| spata19    | spermatogenesis associated 19                                                                                |
| spata20    | spermatogenesis associated 20                                                                                |
| spata21    | spermatogenesis associated 21                                                                                |
| spata22    | spermatogenesis associated 22; olfactory receptor 20                                                         |
| spata3     | spermatogenesis associated 3                                                                                 |
| spata4     | spermatogenesis associated 4                                                                                 |
| spats2     | spermatogenesis associated, serine-rich 2                                                                    |
| specc1     | sperm antigen with calponin homology and coiled-coil domains 1                                               |
| spert      | spermatid associated                                                                                         |
| spg21      | spastic paraplegia 21 homolog (human); similar to spastic paraplegia 21 homolog                              |
| spi5l      | serine protease inhibitor 5-like                                                                             |
| spin2      | spindlin family, member 2                                                                                    |
| spint4     | serine protease inhibitor, Kunitz type 4                                                                     |
| spire1     | spire homolog 1 (Drosophila)                                                                                 |
| spire2     | spire homolog 2 (Drosophila)                                                                                 |
| spnb1      | spectrin beta 1                                                                                              |
| spnb5      | spectrin beta 5                                                                                              |
| spryd4     | SPRY domain containing 4                                                                                     |
| spsb4      | spl/ryanodine receptor domain and SOCS box containing 4                                                      |
| srcrb4d    | scavenger receptor cysteine rich domain containing, group B (4 domains)                                      |
| srcs2      | v-src suppressed transcript 2                                                                                |
| srcs4      | v-src suppressed transcript 4                                                                                |
| srgap1     | SLIT-ROBO Rho GTPase activating protein 1                                                                    |
| srgap2     | SLIT-ROBO Rho GTPase activating protein 2                                                                    |
| srgap3     | SLIT-ROBO Rho GTPase activating protein 3                                                                    |
| srp14      | signal recognition particle 14                                                                               |
| srp54a     | signal recognition particle 54b; signal recognition particle 54a; signal recognition particle 54C            |
| srp54b     | signal recognition particle 54b; signal recognition particle 54a; signal recognition particle 54C            |
| srp68      | signal recognition particle 68                                                                               |
| srp9       | signal recognition particle 9                                                                                |
| srpr       | signal recognition particle receptor ('docking protein')                                                     |
| srprb      | signal recognition particle receptor, B subunit                                                              |
| srst       | simple repeat sequence-containing transcript                                                                 |
| ssbp3      | single-stranded DNA binding protein 3                                                                        |
| ssna1      | Sjogren's syndrome nuclear autoantigen 1                                                                     |
| ssr1       | signal sequence receptor, alpha; similar to signal sequence receptor, alpha                                  |
| ssr2       | signal sequence receptor, beta                                                                               |
| ssr3       | signal sequence receptor, gamma                                                                              |
| ssr4       | signal sequence receptor, delta                                                                              |
| st3gal2    | ST3 beta-galactoside alpha-2,3-sialyltransferase 2                                                           |
| st3gal3    | ST3 beta-galactoside alpha-2,3-sialyltransferase 3                                                           |
| st3gal4    | ST3 beta-galactoside alpha-2,3-sialyltransferase 4                                                           |
| st5        | suppression of tumorigenicity 5                                                                              |
| st6gal2    | beta galactoside alpha 2,6 sialyltransferase 2                                                               |
| st6galnac4 | ST6 (alpha-N-acetyl-neuraminy-2,3-beta-galactosyl-1,3)-N-acetylgalactosaminide alpha-2,6-sialyltransferase 4 |

|            |                                                                                                                                                            |
|------------|------------------------------------------------------------------------------------------------------------------------------------------------------------|
| st8sia3    | ST8 alpha-N-acetyl-neuraminide alpha-2,8-sialyltransferase 3                                                                                               |
| stac       | src homology three (SH3) and cysteine rich domain                                                                                                          |
| stard10    | START domain containing 10                                                                                                                                 |
| stard13    | StAR-related lipid transfer (START) domain containing 13; similar to serologically defined colon cancer antigen 13                                         |
| stard7     | START domain containing 7                                                                                                                                  |
| stard8     | START domain containing 8                                                                                                                                  |
| stard9     | START domain containing 9                                                                                                                                  |
| stbd1      | starch binding domain 1                                                                                                                                    |
| stk33      | serine/threonine kinase 33                                                                                                                                 |
| stt3a      | STT3, subunit of the oligosaccharyltransferase complex, homolog A ( <i>S. cerevisiae</i> )                                                                 |
| suclg1     | succinate-CoA ligase, GDP-forming, alpha subunit                                                                                                           |
| suclg2     | succinate-Coenzyme A ligase, GDP-forming, beta subunit                                                                                                     |
| supt4h2    | suppressor of Ty 4 homolog 2 ( <i>S. cerevisiae</i> )                                                                                                      |
| sval1      | seminal vesicle antigen-like 1                                                                                                                             |
| sval2      | seminal vesicle antigen-like 2                                                                                                                             |
| svep1      | sushi, von Willebrand factor type A, EGF and pentraxin domain containing 1                                                                                 |
| svs3a      | seminal vesicle secretion 3A                                                                                                                               |
| svs3b      | seminal vesicle secretory protein 3B                                                                                                                       |
| syap1      | synapse associated protein 1                                                                                                                               |
| syf2       | SYF2 homolog, RNA splicing factor ( <i>S. cerevisiae</i> )                                                                                                 |
| syng2      | synaptogyrin 2                                                                                                                                             |
| syt13      | synaptotagmin XIII                                                                                                                                         |
| syt15      | synaptotagmin-like 5                                                                                                                                       |
| sytr1      | synaptotagmin related 1                                                                                                                                    |
| syx1       | similar sequence on Y and X 1                                                                                                                              |
| syx2       | similar sequence on Y and X 2                                                                                                                              |
| tagap1     | similar to T-cell activation Rho GTPase-activating protein; T-cell activation Rho GTPase-activating protein; T-cell activation GTPase activating protein 1 |
| tbc1d10a   | TBC1 domain family, member 10a                                                                                                                             |
| tbc1d15    | TBC1 domain family, member 15                                                                                                                              |
| tbc1d2     | TBC1 domain family, member 2                                                                                                                               |
| tbc1d20    | TBC1 domain family, member 20                                                                                                                              |
| tbc1d25    | TBC1 domain family, member 25                                                                                                                              |
| tbc1d30    | TBC1 domain family, member 30                                                                                                                              |
| tbc1d5     | TBC1 domain family, member 5                                                                                                                               |
| tbca       | tubulin cofactor A; predicted gene 4374; predicted gene 6142; similar to cofactor A                                                                        |
| tbcc       | tubulin-specific chaperone C                                                                                                                               |
| tbcd       | tubulin-specific chaperone d                                                                                                                               |
| tceal8     | transcription elongation factor A (SII)-like 8; similar to transcription elongation factor A (SII)-like 8                                                  |
| tceb1l-rs2 | transcription elongation factor B (SIII), polypeptide 1-like, related sequence 2                                                                           |
| tceb2l     | transcription elongation factor B (SIII), polypeptide 2 (elongin B),-like                                                                                  |
| tcf25      | transcription factor 25 (basic helix-loop-helix)                                                                                                           |
| tcfap2b    | transcription factor AP-2 beta                                                                                                                             |
| tcfap2d    | transcription factor AP-2, delta                                                                                                                           |
| tcfap2e    | transcription factor AP-2, epsilon                                                                                                                         |
| tcra-c     | T-cell receptor alpha, constant region                                                                                                                     |
| tcra-v     | T-cell receptor alpha, variable region                                                                                                                     |
| tcra-v1    | T-cell receptor alpha, variable 1                                                                                                                          |
| tcra-v11.1 | T-cell receptor alpha, variable 11.1                                                                                                                       |
| tcra-v11.2 | T-cell receptor alpha, variable 11.2                                                                                                                       |
| tcra-v11.3 | T-cell receptor alpha, variable 11.3                                                                                                                       |
| tcra-v11.8 | T-cell receptor alpha, variable 11.8                                                                                                                       |
| tcra-v13   | T-cell receptor alpha, variable 13                                                                                                                         |
| tcra-v13.1 | T-cell receptor alpha variable region family 13 subfamily 1                                                                                                |

|            |                                                                                                          |
|------------|----------------------------------------------------------------------------------------------------------|
| tcra-v13.2 | T-cell receptor alpha variable region family 13 subfamily 2                                              |
| tcra-v13.3 | T-cell receptor alpha variable region family 13 subfamily 3                                              |
| tcra-v13.4 | T-cell receptor alpha variable region family 13 subfamily 4                                              |
| tcra-v13.5 | T-cell receptor alpha variable region family 13 subfamily 5                                              |
| tcra-v14   | T-cell receptor alpha, variable 14                                                                       |
| tcra-v15   | T-cell receptor alpha, variable 15                                                                       |
| tcra-v16.1 | T-cell receptor, alpha, variable 16.1                                                                    |
| tcra-v19.1 | T-cell receptor alpha, variable 19.1                                                                     |
| tcra-v2    | T-cell receptor alpha, variable 2                                                                        |
| tcra-v2.4  | T-cell receptor alpha, variable 2.4                                                                      |
| tcra-v2.5  | T-cell receptor alpha, variable 2.5                                                                      |
| tcra-v2.6  | T-cell receptor alpha, variable 2.6                                                                      |
| tcra-v22.1 | similar to TRAV10; T-cell receptor alpha, variable 22.4; T-cell receptor alpha, variable 22.1            |
| tcra-v22.2 | T-cell receptor alpha, variable 22.2                                                                     |
| tcra-v22.3 | T-cell receptor alpha, variable 22.3                                                                     |
| tcra-v22.4 | similar to TRAV10; T-cell receptor alpha, variable 22.4; T-cell receptor alpha, variable 22.1            |
| tcra-v23.1 | T-cell receptor alpha, variable 23.1                                                                     |
| tcra-v3    | T-cell receptor alpha, variable 3                                                                        |
| tcra-v3.1  | T-cell receptor alpha, variable 3.1                                                                      |
| tcra-v4    | T-cell receptor alpha, variable 4                                                                        |
| tcra-v5    | T-cell receptor alpha, variable 5                                                                        |
| tcra-v6    | T-cell receptor alpha, variable 6                                                                        |
| tcra-v7    | T-cell receptor alpha, variable 7                                                                        |
| tcra-v9    | T-cell receptor alpha, variable 9                                                                        |
| tcra-va10  | T-cell receptor alpha, variable A10                                                                      |
| tcrb-c     | T-cell receptor beta, constant region                                                                    |
| tcrb-d     | T-cell receptor beta, D region                                                                           |
| tcrb-e     | T-cell receptor beta chain enhancer                                                                      |
| tcrb-j     | T-cell receptor beta, joining region                                                                     |
| tcrb-v     | T-cell receptor beta, variable region                                                                    |
| tcrb-v1    | T-cell receptor beta, variable 1                                                                         |
| tcrb-v10   | T-cell receptor beta, variable 10                                                                        |
| tcrb-v11   | T-cell receptor beta, variable 11                                                                        |
| tcrb-v12   | T-cell receptor beta, variable 12                                                                        |
| tcrb-v13   | T-cell receptor beta, variable 13                                                                        |
| tcrb-v14   | T-cell receptor beta, variable 14                                                                        |
| tcrb-v15   | T-cell receptor beta, variable 15                                                                        |
| tcrb-v16   | T-cell receptor beta, variable 16                                                                        |
| tcrb-v17   | T-cell receptor beta, variable 17                                                                        |
| tcrb-v19   | T-cell receptor beta, variable 19                                                                        |
| tcrb-v2    | T-cell receptor beta, variable 2                                                                         |
| tcrb-v20   | protease, serine, 3; predicted gene 10334; T-cell receptor beta, variable V20; similar to trypsinogen 15 |
| tcrb-v3    | T-cell receptor beta, variable 3                                                                         |
| tcrb-v3.1  | T-cell receptor beta, variable 3.1                                                                       |
| tcrb-v3.2  | T-cell receptor beta, variable 3.2                                                                       |
| tcrb-v4    | T-cell receptor beta, variable 4                                                                         |
| tcrb-v5    | T-cell receptor beta, variable 5                                                                         |
| tcrb-v5.1  | T-cell receptor beta, variable 5.1                                                                       |
| tcrb-v5.2  | T-cell receptor beta, variable 5.2                                                                       |
| tcrb-v6    | T-cell receptor beta, variable 6                                                                         |
| tcrb-v7    | T-cell receptor beta, variable 7                                                                         |
| tcrb-v8    | T-cell receptor beta, variable 8                                                                         |
| tcrb-v8.2  | T-cell receptor beta, variable 8.2                                                                       |
| tcrb-v8.3  | T-cell receptor beta, variable 8.3                                                                       |
| tcrb-v9    | T-cell receptor beta, variable 9                                                                         |

|                  |                                                                                                                                                                      |
|------------------|----------------------------------------------------------------------------------------------------------------------------------------------------------------------|
| tcrd-c           | T-cell receptor delta, constant region                                                                                                                               |
| tcrd-d           | T-cell receptor delta, D region                                                                                                                                      |
| tcrd-j           | T-cell receptor delta, joining region                                                                                                                                |
| tcrd-v           | T-cell receptor delta, variable region                                                                                                                               |
| tcrd-v1          | T-cell receptor delta, variable 1                                                                                                                                    |
| tcrd-v2          | T-cell receptor delta, variable 2                                                                                                                                    |
| tcrd-v3          | T-cell receptor delta, variable 3                                                                                                                                    |
| tcrd-v4          | T-cell receptor delta, variable 4                                                                                                                                    |
| tcrd-v5          | T-cell receptor delta, variable 5                                                                                                                                    |
| tcrd-v5t         | T-cell receptor delta, variable 5T                                                                                                                                   |
| tcrd-v6          | T-cell receptor delta, variable 6                                                                                                                                    |
| tcrd-v7          | T-cell receptor delta, variable 7                                                                                                                                    |
| tcrg             | T-cell receptor gamma, variable 2; T-cell receptor gamma chain                                                                                                       |
| tcrg-c           | T-cell receptor gamma, constant region                                                                                                                               |
| tcrg-c1          | T-cell receptor gamma, constant 1                                                                                                                                    |
| tcrg-c2          | T-cell receptor gamma, constant 2                                                                                                                                    |
| tcrg-c4          | T-cell receptor gamma, constant 4                                                                                                                                    |
| tcrg-j           | T-cell receptor gamma, joining region                                                                                                                                |
| tcrg-v           | T-cell receptor gamma, variable region                                                                                                                               |
| tcrg-v1          | T-cell receptor gamma, variable 1                                                                                                                                    |
| tcrg-v2          | T-cell receptor gamma, variable 2; T-cell receptor gamma chain                                                                                                       |
| tcrg-v3          | T-cell receptor gamma, variable 3                                                                                                                                    |
| tcrg-v4          | T-cell receptor gamma, variable 4                                                                                                                                    |
| tcrg-v5          | T-cell receptor gamma, variable 5                                                                                                                                    |
| tcrg-v6          | T-cell receptor gamma, variable 6                                                                                                                                    |
| tdpoz1           | TD and POZ domain containing 1; similar to TD and POZ domain-containing protein 1 (MAPP family protein 2); predicted gene 9117; predicted gene 9125                  |
| tdpoz2           | TD and POZ domain containing 2; predicted gene 5773                                                                                                                  |
| tdpoz3           | TD and POZ domain containing 3; predicted gene 4982                                                                                                                  |
| tdpoz4           | predicted gene 5541; TD and POZ domain containing 4                                                                                                                  |
| tdpoz5           | predicted gene 10697; predicted gene 5543; similar to Tdpoz5 protein; similar to TD and POZ domain containing 5; predicted gene 9107; TD and POZ domain containing 5 |
| tekt1            | tektin 1                                                                                                                                                             |
| tes3-ps          | testis derived transcript 3, pseudogene                                                                                                                              |
| tex2             | testis expressed gene 2                                                                                                                                              |
| tex21            | testis expressed gene 21                                                                                                                                             |
| tex24            | testis expressed gene 24; predicted gene 6853                                                                                                                        |
| tg(il1a)1.1tsk   | Transgene insertion 1.1, Thomas Kupper                                                                                                                               |
| tg(itga5)0844fmw | transgene insertion 0858, Fiona M Watt                                                                                                                               |
| tg(itgb1)0840fmw | transgene insertion 0840, Fiona M Watt                                                                                                                               |
| tg(tgfb1)1der    | transgene insertion 1, Dennis R Roop                                                                                                                                 |
| tgfb1i2          | transforming growth factor beta 1 induced transcript 2                                                                                                               |
| tgfb1i3          | transforming growth factor beta 1 induced transcript 3                                                                                                               |
| tgtp             | T-cell specific GTPase 1                                                                                                                                             |
| thrap3           | thyroid hormone receptor associated protein 3; predicted gene 5898                                                                                                   |
| thumpd2          | THUMP domain containing 2                                                                                                                                            |
| tiam1            | T-cell lymphoma invasion and metastasis 1                                                                                                                            |
| tiam2            | T-cell lymphoma invasion and metastasis 2                                                                                                                            |
| timm44           | translocase of inner mitochondrial membrane 44                                                                                                                       |
| tk               | tail-kinks                                                                                                                                                           |
| tlk2             | predicted gene 13161; tousled-like kinase 2 (Arabidopsis)                                                                                                            |
| tlim             | T lymphoma oncogene                                                                                                                                                  |
| tln2             | talin 2                                                                                                                                                              |
| tm               | tremulous                                                                                                                                                            |
| tm4sf5           | transmembrane 4 superfamily member 5                                                                                                                                 |

|           |                                                                                                                                                                                                                                                                                                                                                                                                      |
|-----------|------------------------------------------------------------------------------------------------------------------------------------------------------------------------------------------------------------------------------------------------------------------------------------------------------------------------------------------------------------------------------------------------------|
| tm6sf1    | transmembrane 6 superfamily member 1                                                                                                                                                                                                                                                                                                                                                                 |
| tm6sf2    | transmembrane 6 superfamily member 2                                                                                                                                                                                                                                                                                                                                                                 |
| tm9sf1    | transmembrane 9 superfamily member 1                                                                                                                                                                                                                                                                                                                                                                 |
| tm9sf2    | transmembrane 9 superfamily member 2                                                                                                                                                                                                                                                                                                                                                                 |
| tm9sf3    | transmembrane 9 superfamily member 3                                                                                                                                                                                                                                                                                                                                                                 |
| tmed2     | transmembrane emp24 domain trafficking protein 2; predicted gene 10698; predicted gene 7318                                                                                                                                                                                                                                                                                                          |
| tmed9     | transmembrane emp24 protein transport domain containing 9                                                                                                                                                                                                                                                                                                                                            |
| tmem11    | transmembrane protein 11                                                                                                                                                                                                                                                                                                                                                                             |
| tmem115   | transmembrane protein 115                                                                                                                                                                                                                                                                                                                                                                            |
| tmem135   | transmembrane protein 135                                                                                                                                                                                                                                                                                                                                                                            |
| tmem150   | transmembrane protein 150                                                                                                                                                                                                                                                                                                                                                                            |
| tmem159   | transmembrane protein 159                                                                                                                                                                                                                                                                                                                                                                            |
| tmem16d   | anoctamin 4                                                                                                                                                                                                                                                                                                                                                                                          |
| tmem16e   | transmembrane protein 16E                                                                                                                                                                                                                                                                                                                                                                            |
| tmem16f   | anoctamin 6                                                                                                                                                                                                                                                                                                                                                                                          |
| tmem22    | transmembrane protein 22                                                                                                                                                                                                                                                                                                                                                                             |
| tmem30a   | transmembrane protein 30A                                                                                                                                                                                                                                                                                                                                                                            |
| tmem30b   | transmembrane protein 30B                                                                                                                                                                                                                                                                                                                                                                            |
| tmem30c   | transmembrane protein 30C                                                                                                                                                                                                                                                                                                                                                                            |
| tmem33    | transmembrane protein 33                                                                                                                                                                                                                                                                                                                                                                             |
| tmem37    | transmembrane protein 37                                                                                                                                                                                                                                                                                                                                                                             |
| tmem57    | transmembrane protein 57                                                                                                                                                                                                                                                                                                                                                                             |
| tmem59l   | transmembrane protein 59-like                                                                                                                                                                                                                                                                                                                                                                        |
| tmem8     | transmembrane protein 8 (five membrane-spanning domains)                                                                                                                                                                                                                                                                                                                                             |
| tmem85    | transmembrane protein 85                                                                                                                                                                                                                                                                                                                                                                             |
| tmem90a   | transmembrane protein 90a                                                                                                                                                                                                                                                                                                                                                                            |
| tmevd5    | Theiler's murine encephalomyelitis virus induced demyelinating disease susceptibility 5                                                                                                                                                                                                                                                                                                              |
| tmevp1    | heiler's murine encephalomyelitis virus persistence 1                                                                                                                                                                                                                                                                                                                                                |
| tnik      | TRAF2 and NCK interacting kinase                                                                                                                                                                                                                                                                                                                                                                     |
| tnk1      | tyrosine kinase, non-receptor, 1                                                                                                                                                                                                                                                                                                                                                                     |
| tnk2      | tyrosine kinase, non-receptor, 2                                                                                                                                                                                                                                                                                                                                                                     |
| tnrc6c    | trinucleotide repeat containing 6C                                                                                                                                                                                                                                                                                                                                                                   |
| tob2      | transducer of ERBB2, 2                                                                                                                                                                                                                                                                                                                                                                               |
| tomm7     | similar to translocase of outer mitochondrial membrane 7 homolog; translocase of outer mitochondrial membrane 7 homolog (yeast)                                                                                                                                                                                                                                                                      |
| top1-rs1  | topoisomerase (DNA) I, related sequence 1                                                                                                                                                                                                                                                                                                                                                            |
| top2b     | topoisomerase (DNA) II beta                                                                                                                                                                                                                                                                                                                                                                          |
| tor3a     | torsin family 3, member A                                                                                                                                                                                                                                                                                                                                                                            |
| tox2      | TOX high mobility group box family member 2                                                                                                                                                                                                                                                                                                                                                          |
| tox4      | TOX high mobility group box family member 4; predicted gene 5828                                                                                                                                                                                                                                                                                                                                     |
| tpd52-ps  | tumor protein D52, pseudogene                                                                                                                                                                                                                                                                                                                                                                        |
| tpi-rs4   | triosephosphate isomerase related sequence 4                                                                                                                                                                                                                                                                                                                                                         |
| tpml      | tropomyosin-like                                                                                                                                                                                                                                                                                                                                                                                     |
| tpt1p     | predicted gene 1974; tumor protein, translationally-controlled 1 pseudogene; tumor protein, translationally-controlled 1; predicted gene 14456                                                                                                                                                                                                                                                       |
| tpt1-ps1  | tumor protein, translationally-controlled, pseudogene 1                                                                                                                                                                                                                                                                                                                                              |
| tram1     | translocating chain-associating membrane protein 1                                                                                                                                                                                                                                                                                                                                                   |
| trappc1   | trafficking protein particle complex 1                                                                                                                                                                                                                                                                                                                                                               |
| trappc3   | trafficking protein particle complex 3                                                                                                                                                                                                                                                                                                                                                               |
| trappc5   | trafficking protein particle complex 5                                                                                                                                                                                                                                                                                                                                                               |
| trappc6b  | trafficking protein particle complex 6B                                                                                                                                                                                                                                                                                                                                                              |
| trappc9   | trafficking protein particle complex 9                                                                                                                                                                                                                                                                                                                                                               |
| trav12n-1 | predicted gene, EG667677; T cell receptor alpha variable 12d-1; predicted gene 11046; T-cell receptor alpha, variable 8; predicted gene, ENSMUSG00000076785; similar to T cell receptor V alpha 8.5; similar to OTTMUSG00000015204 protein; T cell receptor alpha variable 12N-1; predicted gene, ENSMUSG00000076783; T cell receptor alpha variable 12N-2; similar to T-cell receptor alpha chain V |

|              |                                                                                                                                                    |
|--------------|----------------------------------------------------------------------------------------------------------------------------------------------------|
|              | region CTL-F3 precursor; predicted gene 8758                                                                                                       |
| trav16d/dv11 | T cell receptor alpha variable 16D-DV11                                                                                                            |
| trav7d-3     | T cell receptor alpha chain V region 7D-3; similar to T cell receptor alpha                                                                        |
| trbd1        | T cell receptor beta diversity 1                                                                                                                   |
| trbd2        | T cell receptor beta diversity 2                                                                                                                   |
| trcg1        | taste receptor protein 1                                                                                                                           |
| trdd1        | T cell receptor delta diversity 1                                                                                                                  |
| trdd2        | T cell receptor delta diversity 2                                                                                                                  |
| trdj2        | T cell receptor delta joining 2                                                                                                                    |
| trgj4        | T cell receptor gamma joining 4                                                                                                                    |
| trim14       | tripartite motif-containing 14                                                                                                                     |
| trim17       | tripartite motif-containing 17                                                                                                                     |
| trim23       | tripartite motif-containing 23                                                                                                                     |
| trim36       | tripartite motif-containing 36                                                                                                                     |
| trim45       | tripartite motif-containing 45                                                                                                                     |
| trim46       | tripartite motif-containing 46                                                                                                                     |
| trim47       | tripartite motif-containing 47                                                                                                                     |
| trim59       | similar to mouse RING finger 1; tripartite motif-containing 59                                                                                     |
| trim67       | tripartite motif-containing 67                                                                                                                     |
| trim69       | tripartite motif-containing 69                                                                                                                     |
| trim7        | tripartite motif-containing 7                                                                                                                      |
| triml1       | tripartite motif family-like 1                                                                                                                     |
| trio         | triple functional domain (PTPRF interacting)                                                                                                       |
| triobp       | TRIO and F-actin binding protein                                                                                                                   |
| trmt1        | TRM1 tRNA methyltransferase 1 homolog (S. cerevisiae)                                                                                              |
| trp53i13     | transformation related protein 53 inducible protein 13                                                                                             |
| trpd52l3     | tumor protein D52-like 3                                                                                                                           |
| trpt1        | tRNA phosphotransferase 1                                                                                                                          |
| trub1        | TruB pseudouridine (psi) synthase homolog 1 (E. coli)                                                                                              |
| trub2        | TruB pseudouridine (psi) synthase homolog 2 (E. coli)                                                                                              |
| try5         | trypsin 5                                                                                                                                          |
| tse2         | tissue specific extinction 2, of L-ADH                                                                                                             |
| tsfm         | Ts translation elongation factor, mitochondrial                                                                                                    |
| tsga8        | testis specific gene A8                                                                                                                            |
| tsnaxip1     | translin-associated factor X (Tsnax) interacting protein 1                                                                                         |
| tspan4       | tetraspanin 4                                                                                                                                      |
| tspyl-ps     | testis-specific protein, Y-encoded-like, pseudogene                                                                                                |
| tsri         | T-cell subset ratio influence                                                                                                                      |
| tssk3        | testis-specific serine kinase 3                                                                                                                    |
| ttc1         | tetratricopeptide repeat domain 1                                                                                                                  |
| ttc3         | tetratricopeptide repeat domain 3                                                                                                                  |
| ttc35        | tetratricopeptide repeat domain 35; predicted gene 5333                                                                                            |
| ttc4         | tetratricopeptide repeat domain 4                                                                                                                  |
| ttl1         | tubulin tyrosine ligase-like 1                                                                                                                     |
| ttl3         | tubulin tyrosine ligase-like family, member 3                                                                                                      |
| ttl4         | tubulin tyrosine ligase-like family, member 4                                                                                                      |
| tuba1b       | predicted gene 3756; tubulin, alpha 1B; predicted gene 5620; similar to alpha-tubulin isotype M-alpha-2; predicted gene 14150; predicted gene 3226 |
| tuba-rs1     | tubulin alpha, related sequence 1                                                                                                                  |
| tubb2b       | tubulin, beta 2a, pseudogene 2; tubulin, beta 2B                                                                                                   |
| tubb2c       | tubulin, beta 2c, psuedogene 1; tubulin, beta 2C; tubulin, beta 2c, pseudogene 2                                                                   |
| tulp3        | tubby-like protein 3                                                                                                                               |
| tulp4        | similar to mKIAA1397 protein; tubby like protein 4                                                                                                 |
| twf1         | twinfilin, actin-binding protein, homolog 1 (Drosophila); predicted gene 4887                                                                      |
| twf2         | twinfilin, actin-binding protein, homolog 2 (Drosophila)                                                                                           |

|               |                                                                                                |
|---------------|------------------------------------------------------------------------------------------------|
| txndc1        | thioredoxin-related transmembrane protein 1                                                    |
| txndc14       | thioredoxin domain containing 14                                                               |
| txndc9        | predicted gene 8774; predicted gene 7868; thioredoxin domain containing 9                      |
| txnl1         | thioredoxin-like 1                                                                             |
| ube1y1-ps2    | ubiquitin-activating enzyme E1, Chr Y-1, pseudogene 2                                          |
| ube2w         | ubiquitin-conjugating enzyme E2W (putative)                                                    |
| ubl3          | ubiquitin-like 3                                                                               |
| ubl7          | ubiquitin-like 7 (bone marrow stromal cell-derived)                                            |
| ubqln3        | ubiquilin 3                                                                                    |
| ubtd2         | ubiquitin domain containing 2                                                                  |
| ubxd5         | UBX domain containing 5                                                                        |
| ubxd6         | UBX domain protein 8                                                                           |
| uchl4         | ubiquitin carboxyl-terminal esterase L4                                                        |
| uck1          | uridine-cytidine kinase 1; predicted gene 4482                                                 |
| umpk-ps       | uridine monophosphate kinase, pseudogene                                                       |
| unc50         | unc-50 homolog (C. elegans)                                                                    |
| uqcrb         | predicted gene 2962; ubiquinol-cytochrome c reductase binding protein                          |
| usmg5         | upregulated during skeletal muscle growth 5                                                    |
| uso1          | USO1 homolog, vesicle docking protein (yeast)                                                  |
| usp12         | ubiquitin specific peptidase 12; predicted gene 8902                                           |
| usp38         | ubiquitin specific peptidase 38                                                                |
| usp6nl        | USP6 N-terminal like                                                                           |
| v1rh13        | vomer nasal 1 receptor 219                                                                     |
| vars          | valyl-tRNA synthetase                                                                          |
| vav1          | vav 1 oncogene                                                                                 |
| vav2          | vav 2 oncogene                                                                                 |
| vav3          | vav 3 oncogene                                                                                 |
| vgll1         | vestigial like 1 homolog (Drosophila)                                                          |
| vh7183.a28.48 | Ig heavy chain V region VH7183.a28.48                                                          |
| vhll          | von Hippel-Lindau tumor suppressor-like, pseudogene 1                                          |
| vit           | vitrin                                                                                         |
| vps13c        | vacuolar protein sorting 13C (yeast)                                                           |
| vps13d        | vacuolar protein sorting 13 D (yeast)                                                          |
| vps26b        | vacuolar protein sorting 26 homolog B (yeast)                                                  |
| vrk3          | vaccinia related kinase 3                                                                      |
| wd            | waddler                                                                                        |
| wdfy3         | WD repeat and FYVE domain containing 3                                                         |
| wdr12         | WD repeat domain 12; predicted gene 4879                                                       |
| wdr13         | WD repeat domain 13                                                                            |
| wdr16         | WD repeat domain 16                                                                            |
| wdr25         | WD repeat domain 25                                                                            |
| wdr3          | WD repeat domain 3                                                                             |
| wdr31         | WD repeat domain 31                                                                            |
| wdr33         | WD repeat domain 33                                                                            |
| wdr4          | WD repeat domain 4                                                                             |
| wdr44         | WD repeat domain 44                                                                            |
| wdr45         | WD repeat domain 45                                                                            |
| wdr6          | WD repeat domain 6                                                                             |
| wdr61         | WD repeat domain 61                                                                            |
| wdr7          | WD repeat domain 7                                                                             |
| wdr8          | WD repeat domain 8                                                                             |
| wfdc15b       | WAP four-disulfide core domain 15B                                                             |
| wfdc3         | WAP four-disulfide core domain 3                                                               |
| x76971        | T cell receptor alpha variable 14N-3; cDNA sequence X76971; predicted gene, OTTMUSG00000015124 |
| xcr1          | chemokine (C motif) receptor 1                                                                 |

|            |                                                                                                                                         |
|------------|-----------------------------------------------------------------------------------------------------------------------------------------|
| xkrx       | X Kell blood group precursor related X linked                                                                                           |
| xm_359419  | zygote arrest 1-like                                                                                                                    |
| xmv12      | xenotropic murine leukemia virus 12                                                                                                     |
| xmv24      | xenotropic murine leukemia virus 24                                                                                                     |
| xmv26      | xenotropic murine leukemia virus 26                                                                                                     |
| xmv28      | xenotropic murine leukemia virus 28                                                                                                     |
| xmv33      | xenotropic murine leukemia virus 33                                                                                                     |
| xmv45      | xenotropic murine leukemia virus 45                                                                                                     |
| xmv65      | xenotropic murine leukemia virus 65                                                                                                     |
| xmv66      | xenotropic murine leukemia virus 66                                                                                                     |
| xrra1      | X-ray radiation resistance associated 1                                                                                                 |
| yif1a      | Yip1 interacting factor homolog A ( <i>S. cerevisiae</i> )                                                                              |
| yipf1      | Yip1 domain family, member 1                                                                                                            |
| yipf5      | Yip1 domain family, member 5; predicted gene 5738                                                                                       |
| yme111     | YME1-like 1 ( <i>S. cerevisiae</i> )                                                                                                    |
| ypel1      | yippee-like 1 ( <i>Drosophila</i> )                                                                                                     |
| ypel3      | yippee-like 3 ( <i>Drosophila</i> )                                                                                                     |
| ypel4      | yippee-like 4 ( <i>Drosophila</i> )                                                                                                     |
| ypel5      | yippee-like 5 ( <i>Drosophila</i> )                                                                                                     |
| zbed4      | predicted gene 8007; hypothetical protein LOC100045355; predicted gene 3711; zinc finger, BED domain containing 4; predicted gene 15583 |
| zbtb12     | zinc finger and BTB domain containing 12                                                                                                |
| zbtb25     | zinc finger and BTB domain containing 25                                                                                                |
| zbtb34     | zinc finger and BTB domain containing 34                                                                                                |
| zbtb43     | zinc finger and BTB domain containing 43                                                                                                |
| zbtb6      | RIKEN cDNA A930039A15 gene; zinc finger and BTB domain containing 6                                                                     |
| zc3h14     | zinc finger CCCH type containing 14                                                                                                     |
| zc3h7a     | zinc finger CCCH type containing 7 A                                                                                                    |
| zcchc17    | zinc finger, CCHC domain containing 17                                                                                                  |
| zcchc4     | zinc finger, CCHC domain containing 4                                                                                                   |
| zcrb1      | predicted gene 9202; zinc finger CCHC-type and RNA binding motif 1                                                                      |
| zdhhc1     | zinc finger, DHHC domain containing 1                                                                                                   |
| zdhhc16    | zinc finger, DHHC domain containing 16                                                                                                  |
| zdhhc21    | zinc finger, DHHC domain containing 21                                                                                                  |
| zdhhc3     | zinc finger, DHHC domain containing 3                                                                                                   |
| zdhhc7     | zinc finger, DHHC domain containing 7                                                                                                   |
| zer1       | zer-1 homolog ( <i>C. elegans</i> )                                                                                                     |
| zfand2a    | zinc finger, AN1-type domain 2A                                                                                                         |
| zfand3     | zinc finger, AN1-type domain 3; similar to Zfand3 protein                                                                               |
| zfand6     | zinc finger, AN1-type domain 6                                                                                                          |
| zfml       | zinc finger, matrin-like                                                                                                                |
| zfp1       | zinc finger protein 1                                                                                                                   |
| zfp105     | zinc finger protein 105                                                                                                                 |
| zfp111     | zinc finger protein 111                                                                                                                 |
| zfp113     | zinc finger protein 113                                                                                                                 |
| zfp119     | zinc finger protein 119                                                                                                                 |
| zfp12      | zinc finger protein 12                                                                                                                  |
| zfp120     | zinc finger protein 120                                                                                                                 |
| zfp125     | zinc finger protein 125                                                                                                                 |
| zfp161-rs1 | zinc finger protein 161, related sequence 1                                                                                             |
| zfp207     | zinc finger protein 207                                                                                                                 |
| zfp212     | Zinc finger protein 212                                                                                                                 |
| zfp239     | zinc finger protein 239                                                                                                                 |
| zfp263     | zinc finger protein 263                                                                                                                 |
| zfp27      | zinc finger protein 27                                                                                                                  |



|          |                                                           |
|----------|-----------------------------------------------------------|
| zfp28    | zinc finger protein 28; predicted gene 3203               |
| zfp30    | zinc finger protein 30                                    |
| zfp300   | zinc finger protein 300                                   |
| zfp317   | zinc finger protein 317                                   |
| zfp319   | zinc finger protein 319                                   |
| zfp322a  | zinc finger protein 322A                                  |
| zfp326   | zinc finger protein 326                                   |
| zfp330   | zinc finger protein 330                                   |
| zfp354b  | zinc finger protein 354B                                  |
| zfp367   | zinc finger protein 367                                   |
| zfp37    | zinc finger protein 37                                    |
| zfp382   | zinc finger protein 382                                   |
| zfp383   | zinc finger protein 383                                   |
| zfp386   | zinc finger protein 386 (Kruppel-like)                    |
| zfp414   | zinc finger protein 414                                   |
| zfp418   | zinc finger protein 418                                   |
| zfp438   | zinc finger protein 438                                   |
| zfp445   | zinc finger protein 445                                   |
| zfp446   | zinc finger protein 446                                   |
| zfp449   | zinc finger protein 449                                   |
| zfp457   | zinc finger protein 457                                   |
| zfp458   | zinc finger protein 458                                   |
| zfp472   | zinc finger protein 472                                   |
| zfp51    | hypothetical protein LOC100044272; zinc finger protein 51 |
| zfp54    | hypothetical protein LOC100044271; zinc finger protein 54 |
| zfp58    | zinc finger protein 58                                    |
| zfp59    | zinc finger protein 59; predicted gene 7452               |
| zfp60    | similar to Zinc finger protein 60; zinc finger protein 60 |
| zfp606   | zinc finger protein 606                                   |
| zfp61    | zinc finger protein 61                                    |
| zfp612   | zinc finger protein 612                                   |
| zfp622   | zinc finger protein 622                                   |
| zfp637   | zinc finger protein 637                                   |
| zfp641   | zinc finger protein 641                                   |
| zfp655   | zinc finger protein 655                                   |
| zfp661   | zinc finger protein 661                                   |
| zfp689   | zinc finger protein 689                                   |
| zfp7     | zinc finger protein 7                                     |
| zfp74    | zinc finger protein 74; hypothetical protein LOC100044255 |
| zfp825   | zinc finger protein 825                                   |
| zfp87    | zinc finger protein 87                                    |
| zfp93    | zinc finger protein 93; predicted gene 11677              |
| zfp94    | zinc finger protein 94                                    |
| zfp97    | zinc finger protein 97; cDNA sequence BC018101            |
| zfp1     | zinc finger like protein 1                                |
| zfyve1   | zinc finger, FYVE domain containing 1                     |
| zfyve20  | zinc finger, FYVE domain containing 20                    |
| zfyve27  | zinc finger, FYVE domain containing 27                    |
| zkscan14 | zinc finger with KRAB and SCAN domains 14                 |
| zkscan5  | zinc finger with KRAB and SCAN domains 5                  |
| zkscan6  | zinc finger with KRAB and SCAN domains 6                  |
| zmym5    | zinc finger, MYM-type 5                                   |
| znr4     | zinc and ring finger 4                                    |
| zscan12  | zinc finger and SCAN domain containing 12                 |
| zscan2   | zinc finger and SCAN domain containing 2                  |

|         |                                           |
|---------|-------------------------------------------|
| zscan22 | zinc finger and SCAN domain containing 22 |
|---------|-------------------------------------------|

**Table S18. G protein signaling theoretical dataset.** The G protein signaling dataset represents the intersection between the cellular signaling and G protein theoretical datasets.

| Gene Symbol   | Gene Definition                                                                           |
|---------------|-------------------------------------------------------------------------------------------|
| LOC139796     | LOC139796                                                                                 |
| 0610007p14rik | RIKEN cDNA 0610007P14 gene                                                                |
| 0610031j06rik | RIKEN cDNA 0610031J06 gene                                                                |
| 1600002k03rik | RIKEN cDNA 1600002K03 gene                                                                |
| 1700009n14rik | RIKEN cDNA 1700009N14 gene                                                                |
| 1700057k13rik | RIKEN cDNA 1700057K13 gene                                                                |
| 1810014f10rik | RIKEN cDNA 1810014F10 gene                                                                |
| 2310001a20rik | RIKEN cDNA 2310001A20 gene                                                                |
| 2410018m08rik | RIKEN cDNA 2410018M08 gene                                                                |
| 2500003m10rik | RIKEN cDNA 2500003M10 gene                                                                |
| 2700078k21rik | RIKEN cDNA 2700078K21 gene                                                                |
| 4833424o15rik | RIKEN cDNA 4833424O15 gene                                                                |
| 4930420k17rik | RIKEN cDNA 4930420K17 gene                                                                |
| 4930455c21rik | RIKEN cDNA 4930455C21 gene                                                                |
| 4933424b01rik | RIKEN cDNA 4933424B01 gene                                                                |
| 4933436h12rik | RIKEN cDNA 4933436H12 gene                                                                |
| 6430548m08rik | RIKEN cDNA 6430548M08 gene                                                                |
| 9430023l20rik | RIKEN cDNA 9430023L20 gene                                                                |
| A130040m12rik | RIKEN cDNA A130040M12 gene                                                                |
| Abcb6         | ATP-binding cassette, sub-family B (MDR/TAP), member 6                                    |
| Actr8         | ARP8 actin-related protein 8 homolog ( <i>S. cerevisiae</i> )                             |
| Adcy2         | adenylate cyclase 2                                                                       |
| Adcy4         | adenylate cyclase 4                                                                       |
| Adcy5         | adenylate cyclase 5; similar to adenylate cyclase 5                                       |
| Adnp2         | ADNP homeobox 2                                                                           |
| Aig1          | androgen-induced 1                                                                        |
| Ak3l1         | predicted gene 13639; similar to adenylate kinase 4; adenylate kinase 3-like 1            |
| Ak5           | adenylate kinase 5                                                                        |
| Akap13        | A kinase (PRKA) anchor protein 13                                                         |
| Akr1e1        | aldo-keto reductase family 1, member E1                                                   |
| Als2cr2       | amyotrophic lateral sclerosis 2 (juvenile) chromosome region, candidate 2 homolog (human) |
| Ankrd7        | ankyrin repeat domain 7                                                                   |
| Ard1b         | N(alpha)-acetyltransferase 11, NatA catalytic subunit                                     |
| Arhgap1       | Rho GTPase activating protein 1; predicted gene 8514                                      |
| Arhgap10      | Rho GTPase activating protein 10                                                          |
| Arhgap21      | Rho GTPase activating protein 21                                                          |
| Arhgap22      | Rho GTPase activating protein 22                                                          |
| Arhgap26      | RIKEN cDNA 9630014M24 gene; Rho GTPase activating protein 26; predicted gene 5820         |
| Arhgap29      | Rho GTPase activating protein 29                                                          |
| Arhgap36      | Rho GTPase activating protein 36                                                          |
| Arhgap4       | Rho GTPase activating protein 4                                                           |

|               |                                                                                                                                              |
|---------------|----------------------------------------------------------------------------------------------------------------------------------------------|
| Arhgap5       | Rho GTPase activating protein 5                                                                                                              |
| Arhgap8       | Rho GTPase activating protein 8                                                                                                              |
| Arhgef1       | Rho guanine nucleotide exchange factor (GEF) 1                                                                                               |
| Arhgef11      | Rho guanine nucleotide exchange factor (GEF) 11                                                                                              |
| Arhgef12      | predicted gene 7281; predicted gene 5831; similar to SP140 nuclear body protein (predicted); Rho guanine nucleotide exchange factor (GEF) 12 |
| Arhgef15      | Rho guanine nucleotide exchange factor (GEF) 15                                                                                              |
| Arhgef17      | Rho guanine nucleotide exchange factor (GEF) 17                                                                                              |
| Arhgef2       | rho/rac guanine nucleotide exchange factor (GEF) 2                                                                                           |
| Arhgef4       | Rho guanine nucleotide exchange factor (GEF) 4                                                                                               |
| Arhgef6       | Rac/Cdc42 guanine nucleotide exchange factor (GEF) 6                                                                                         |
| Arid3c        | AT rich interactive domain 3C (BRIGHT-like)                                                                                                  |
| Arl6ip1       | ADP-ribosylation factor-like 6 interacting protein 1                                                                                         |
| Arl6ip4       | ADP-ribosylation factor-like 6 interacting protein 4; similar to SRp25 nuclear protein                                                       |
| Arl8b         | ADP-ribosylation factor-like 8B                                                                                                              |
| Ars2          | serrate RNA effector molecule homolog (Arabidopsis)                                                                                          |
| Arsj          | arylsulfatase J                                                                                                                              |
| Arsk          | similar to arylsulfatase K; arylsulfatase K                                                                                                  |
| Astl          | similar to Astacin-like metalloendopeptidase precursor (Oocyte astacin) (Ovastacin); astacin-like metalloendopeptidase (M12 family)          |
| Asxl3         | additional sex combs like 3 (Drosophila)                                                                                                     |
| Atad3a        | ATPase family, AAA domain containing 3A                                                                                                      |
| Atp13a3       | ATPase type 13A3                                                                                                                             |
| Atp5f1        | ATP synthase, H <sup>+</sup> transporting, mitochondrial F0 complex, subunit b, isoform 1; predicted gene 12231                              |
| Atp5k         | predicted gene 2972; ATP synthase, H <sup>+</sup> transporting, mitochondrial F1F0 complex, subunit e                                        |
| Atpaf1        | ATP synthase mitochondrial F1 complex assembly factor 1                                                                                      |
| Aup1          | ancient ubiquitous protein 1                                                                                                                 |
| Aw125753      | Fam84a family with sequence similarity 84, member A                                                                                          |
| Axud1         | cysteine-serine-rich nuclear protein 1                                                                                                       |
| B020018g12rik | RNA binding motif protein 8a; RIKEN cDNA B020018G12 gene                                                                                     |
| B230208h17rik | RIKEN cDNA B230208H17 gene                                                                                                                   |
| Bc010304      | Fam120a family with sequence similarity 120, member A                                                                                        |
| Bc017158      | cDNA sequence BC017158                                                                                                                       |
| Bc021395      | Bc021395                                                                                                                                     |
| Bc028663      | Bc028663                                                                                                                                     |
| Bc029169      | Bc029169                                                                                                                                     |
| Bcar3         | breast cancer anti-estrogen resistance 3                                                                                                     |
| Bcas2         | breast carcinoma amplified sequence 2                                                                                                        |
| Bin3          | bridging integrator 3                                                                                                                        |
| Bnip2         | BCL2/adenovirus E1B interacting protein 2                                                                                                    |
| Bnipl         | BCL2/adenovirus E1B 19kD interacting protein like                                                                                            |
| Brd1          | bromodomain containing 1; similar to bromodomain containing 1                                                                                |
| Bri3bp        | Bri3 binding protein                                                                                                                         |
| Bspry         | B-box and SPRY domain containing                                                                                                             |
| Cab39         | calcium binding protein 39                                                                                                                   |
| Camk1g        | calcium/calmodulin-dependent protein kinase I gamma                                                                                          |
| Card6         | caspase recruitment domain family, member 6                                                                                                  |
| Ccdc88a       | coiled coil domain containing 88A                                                                                                            |
| Ccdc88b       | coiled-coil domain containing 88B                                                                                                            |

|           |                                                                                     |
|-----------|-------------------------------------------------------------------------------------|
| Ccp1      | cell cycle progression 1                                                            |
| Ccpn-ps   | calcyphosine, pseudogene                                                            |
| Cd247     | CD247 antigen                                                                       |
| Cd3g      | CD3 antigen, gamma polypeptide                                                      |
| Cdc42bpb  | CDC42 binding protein kinase beta                                                   |
| Cdc42ep2  | CDC42 effector protein (Rho GTPase binding) 2                                       |
| Cdc42ep5  | CDC42 effector protein (Rho GTPase binding) 5                                       |
| Cdc42se1  | CDC42 small effector 1                                                              |
| Cdgap     | Rho GTPase activating protein 31                                                    |
| Cenpw     | centromere protein W                                                                |
| Centa1    | ArfGAP with dual PH domains 1                                                       |
| Centd2    | ArfGAP with RhoGAP domain, ankyrin repeat and PH domain 1                           |
| Centd3    | ArfGAP with RhoGAP domain, ankyrin repeat and PH domain 3                           |
| Centg1    | ArfGAP with GTPase domain, ankyrin repeat and PH domain 2                           |
| Centg2    | ArfGAP with GTPase domain, ankyrin repeat and PH domain 1                           |
| Centg3    | ArfGAP with GTPase domain, ankyrin repeat and PH domain 3                           |
| Cep57     | centrosomal protein 57                                                              |
| Chn1      | chimerin (chimaerin) 1                                                              |
| Chn2      | chimerin (chimaerin) 2                                                              |
| Chpst     | chondroprogenitor specific transcript                                               |
| Cirbp-rs1 | cold inducible RNA binding protein, related sequence 1                              |
| Cirbp-rs3 | cold inducible RNA binding protein, related sequence 3                              |
| Clec4b1   | C-type lectin domain family 4, member b1                                            |
| Clybl     | citrate lyase beta like                                                             |
| Cml1      | N-acetyltransferase 8B; camello-like 1                                              |
| Cml2      | camello-like 2                                                                      |
| Cml3      | predicted gene 4477; camello-like 3                                                 |
| Cml5      | camello-like 5                                                                      |
| Cnbp12    | cellular nucleic acid binding protein-like 2                                        |
| Cnih      | cornichon homolog (Drosophila)                                                      |
| Cnksr1    | connector enhancer of kinase suppressor of Ras 1                                    |
| Cnm1      | cyclin M1                                                                           |
| Cnm2      | cyclin M2                                                                           |
| Cnm3      | cyclin M3                                                                           |
| Cnot1     | predicted gene 6158; CCR4-NOT transcription complex, subunit 1                      |
| Cnot8     | CCR4-NOT transcription complex, subunit 8                                           |
| Cops4     | COP9 (constitutive photomorphogenic) homolog, subunit 4 (Arabidopsis thaliana)      |
| Coq4      | coenzyme Q4 homolog (yeast)                                                         |
| Coro2a    | coronin, actin binding protein 2A                                                   |
| Cpne3     | copine III                                                                          |
| Creg2     | cellular repressor of E1A-stimulated genes 2                                        |
| Cryz1     | crystallin, zeta (quinone reductase)-like 1                                         |
| Csf2ra    | colony stimulating factor 2 receptor, alpha, low-affinity (granulocyte-macrophage)  |
| Csf2rb2   | colony stimulating factor 2 receptor, beta 2, low-affinity (granulocyte-macrophage) |
| Csmd2     | CUB and Sushi multiple domains 2                                                    |
| Csnk1g1   | casein kinase 1, gamma 1                                                            |
| Csnk1g2   | casein kinase 1, gamma 2                                                            |
| Csnk1g3   | casein kinase 1, gamma 3; similar to casein kinase 1, gamma 3                       |

|               |                                                                |
|---------------|----------------------------------------------------------------|
| Csrnp2        | cysteine-serine-rich nuclear protein 2                         |
| Csrnp3        | cysteine-serine-rich nuclear protein 3                         |
| Ctf2          | cardiotrophin 2                                                |
| Ctps2         | cytidine 5'-triphosphate synthase 2                            |
| Cutc          | cutC copper transporter homolog (E.coli)                       |
| D10ertd610e   | DNA segment, Chr 10, ERATO Doi 610, expressed                  |
| D11mit109     | DNA segment, Chr 11, Massachusetts Institute of Technology 109 |
| D11mit205     | DNA segment, Chr 11, Massachusetts Institute of Technology 205 |
| D13mit91      | DNA segment, Chr 13, Massachusetts Institute of Technology 91  |
| D14mit116     | DNA segment, Chr 14, Massachusetts Institute of Technology 116 |
| D14mit173     | DNA segment, Chr 14, Massachusetts Institute of Technology 173 |
| D14mit56      | DNA segment, Chr 14, Massachusetts Institute of Technology 56  |
| D15mit198     | DNA segment, Chr 15, Massachusetts Institute of Technology 198 |
| D17mit7       | DNA segment, Chr 17, Massachusetts Institute of Technology 7   |
| D19mit24      | DNA segment, Chr 19, Massachusetts Institute of Technology 24  |
| D19mit66      | DNA segment, Chr 19, Massachusetts Institute of Technology 66  |
| D19mit75      | DNA segment, Chr 19, Massachusetts Institute of Technology 75  |
| D330017j20rik | Fam40b family with sequence similarity 40, member B            |
| D5mit317      | DNA segment, Chr 5, Massachusetts Institute of Technology 317  |
| D6mit252      | DNA segment, Chr 6, Massachusetts Institute of Technology 252  |
| D8ertd82e     | DNA segment, Chr 8, ERATO Doi 82, expressed                    |
| D930005d10rik | Radil Ras association and DIL domains                          |
| D9mit60       | DNA segment, Chr 9, Massachusetts Institute of Technology 60   |
| D9mit61       | DNA segment, Chr 9, Massachusetts Institute of Technology 61   |
| Dak           | dihydroxyacetone kinase 2 homolog (yeast)                      |
| Dchs2         | dachsous 2 (Drosophila)                                        |
| Ddx41         | DEAD (Asp-Glu-Ala-Asp) box polypeptide 41                      |
| Ddx47         | DEAD (Asp-Glu-Ala-Asp) box polypeptide 47                      |
| Ddx54         | DEAD (Asp-Glu-Ala-Asp) box polypeptide 54                      |
| Ddx55         | DEAD (Asp-Glu-Ala-Asp) box polypeptide 55                      |
| Def6          | differentially expressed in FDCP 6                             |
| Def8          | differentially expressed in FDCP 8                             |
| Defb29        | defensin beta 29                                               |
| Dennd4c       | DENN/MADD domain containing 4C                                 |
| Depdc2        | DEP domain containing 2                                        |
| Dgkb          | diacylglycerol kinase, beta                                    |
| Dgkd          | diacylglycerol kinase, delta                                   |
| Dgkg          | diacylglycerol kinase, gamma                                   |
| Dgkq          | diacylglycerol kinase, theta                                   |
| Dhdds         | dehydrololichyl diphosphate synthase                           |
| Dhx35         | predicted gene 4713; DEAH (Asp-Glu-Ala-His) box polypeptide 35 |
| Diras1        | DIRAS family, GTP-binding RAS-like 1                           |
| Diras2        | DIRAS family, GTP-binding RAS-like 2                           |
| Dock1         | dedicator of cytokinesis 1                                     |
| Dock10        | dedicator of cytokinesis 10                                    |
| Dock2         | dedicator of cyto-kinesis 2                                    |
| Dock4         | dedicator of cytokinesis 4                                     |
| Dock9         | dedicator of cytokinesis 9                                     |

|                    |                                                                                                    |
|--------------------|----------------------------------------------------------------------------------------------------|
| Dolpp1             | dolichyl pyrophosphate phosphatase 1                                                               |
| Dpf2               | D4, zinc and double PHD fingers family 2                                                           |
| Dph2               | DPH2 homolog ( <i>S. cerevisiae</i> )                                                              |
| Dph3               | DPH3 homolog (KT111, <i>S. cerevisiae</i> )                                                        |
| Dqx1               | DEAQ RNA-dependent ATPase                                                                          |
| Dtd1               | similar to D-tyrosyl-tRNA deacylase 1; D-tyrosyl-tRNA deacylase 1 homolog ( <i>S. cerevisiae</i> ) |
| Dub2               | ubiquitin specific peptidase 17-like 5                                                             |
| Dub3               | predicted gene 6596                                                                                |
| Dub4               | deubiquitinating enzyme 4                                                                          |
| Dullard            | similar to Dullard homolog ( <i>Xenopus laevis</i> ); Dullard homolog ( <i>Xenopus laevis</i> )    |
| E130112I23rik      | RIKEN cDNA E130112L23 gene                                                                         |
| Efhd1              | EF hand domain containing 1                                                                        |
| Egfl8              | EGF-like domain 8                                                                                  |
| Eif3i              | eukaryotic translation initiation factor 3, subunit I                                              |
| Elmo1              | engulfment and cell motility 1, ced-12 homolog ( <i>C. elegans</i> )                               |
| Elmo2              | engulfment and cell motility 2, ced-12 homolog ( <i>C. elegans</i> )                               |
| Emilin3            | elastin microfibril interfacier 3                                                                  |
| Eml3               | echinoderm microtubule associated protein like 3                                                   |
| Ensmusg00000053178 | Gm9897 predicted gene 9897                                                                         |
| Ensmusg00000067748 | Rpl17-ps5 ribosomal protein L17, pseudogene 5                                                      |
| Epb4.1I4a          | erythrocyte protein band 4.1-like 4a                                                               |
| Epb4.1I4b          | erythrocyte protein band 4.1-like 4b                                                               |
| Eps8               | epidermal growth factor receptor pathway substrate 8                                               |
| Eps8I1             | EPS8-like 1                                                                                        |
| Eps8I2             | EPS8-like 2                                                                                        |
| Eps8I3             | EPS8-like 3                                                                                        |
| Eral1              | Era (G-protein)-like 1 ( <i>E. coli</i> )                                                          |
| Erd1               | erythroid differentiation regulator 1                                                              |
| Etaa1              | Ewing's tumor-associated antigen 1                                                                 |
| Etv2               | similar to ETS related protein 71; ets variant gene 2                                              |
| Exoc2              | exocyst complex component 2                                                                        |
| Exosc8             | exosome component 8                                                                                |
| F830045p16rik      | RIKEN cDNA F830045P16 gene                                                                         |
| Fam177a            | Fam177a family with sequence similarity 177, member A                                              |
| Fam40a             | family with sequence similarity 40, member A                                                       |
| Fam57a             | Fam57a family with sequence similarity 57, member A                                                |
| Fam92a             | family with sequence similarity 92, member A                                                       |
| Farp2              | FERM, RhoGEF and pleckstrin domain protein 2                                                       |
| Fbxo10             | F-box protein 10                                                                                   |
| Ficd               | FIC domain containing                                                                              |
| Fitm1              | fat storage-inducing transmembrane protein 1                                                       |
| Fndc1              | fibronectin type III domain containing 1; similar to fibronectin type III domain containing 1      |
| Fndc4              | fibronectin type III domain containing 4                                                           |
| Fndc5              | fibronectin type III domain containing 5                                                           |
| Fpgt               | fucose-1-phosphate guanylyltransferase                                                             |
| Frag1              | post-GPI attachment to proteins 2                                                                  |
| Frmd4b             | FERM domain containing 4B                                                                          |
| Ftsj2              | FtsJ homolog 2 ( <i>E. coli</i> )                                                                  |

|         |                                                                                                                           |
|---------|---------------------------------------------------------------------------------------------------------------------------|
| Fuk     | fucokinase                                                                                                                |
| Gas2l1  | growth arrest-specific 2 like 1                                                                                           |
| Gas2l2  | growth arrest-specific 2 like 2                                                                                           |
| Gas4    | growth arrest specific 4                                                                                                  |
| Gde1    | glycerophosphodiester phosphodiesterase 1                                                                                 |
| Gdpd1   | glycerophosphodiester phosphodiesterase domain containing 1                                                               |
| Gdpd4   | glycerophosphodiester phosphodiesterase domain containing 4                                                               |
| Gem     | GTP binding protein (gene overexpressed in skeletal muscle)                                                               |
| Get4    | golgi to ER traffic protein 4 homolog ( <i>S. cerevisiae</i> )                                                            |
| Gfm1    | G elongation factor, mitochondrial 1                                                                                      |
| Ggps1   | geranylgeranyl diphosphate synthase 1; similar to Ggps1 protein; predicted gene 5630                                      |
| Ggt7    | gamma-glutamyltransferase 7                                                                                               |
| Gimap1  | GTPase, IMAP family member 1                                                                                              |
| Gimap6  | GTPase, IMAP family member 6                                                                                              |
| Gimap7  | GTPase, IMAP family member 7                                                                                              |
| Gimap8  | GTPase, IMAP family member 8                                                                                              |
| Gimap9  | GTPase, IMAP family member 9                                                                                              |
| Gipc2   | GIPC PDZ domain containing family, member 2                                                                               |
| Gipc3   | GIPC PDZ domain containing family, member 3                                                                               |
| Glpr2   | GLI pathogenesis-related 2                                                                                                |
| Glod4   | glyoxalase domain containing 4                                                                                            |
| Gm11818 | Gm11818 predicted gene 11818                                                                                              |
| Gm13290 | Gm13290 predicted gene 13290                                                                                              |
| Gm13458 | Gm13458 predicted gene 13458                                                                                              |
| Gm15352 | Gm15352 predicted gene 15352                                                                                              |
| Gm347   | predicted gene 347                                                                                                        |
| Gm7325  | Gm7325 predicted gene 7325                                                                                                |
| Gm885   | predicted gene 885                                                                                                        |
| Gmpr    | guanosine monophosphate reductase                                                                                         |
| Gna11   | guanine nucleotide binding protein, alpha 11                                                                              |
| Gna12   | guanine nucleotide binding protein, alpha 12; similar to Guanine nucleotide-binding protein alpha-12 subunit (G alpha-12) |
| Gna13   | guanine nucleotide binding protein, alpha 13                                                                              |
| Gna14   | guanine nucleotide binding protein, alpha 14                                                                              |
| Gna15   | guanine nucleotide binding protein, alpha 15                                                                              |
| Gnai1   | guanine nucleotide binding protein (G protein), alpha inhibiting 1                                                        |
| Gnai3   | guanine nucleotide binding protein (G protein), alpha inhibiting 3                                                        |
| Gnal    | guanine nucleotide binding protein, alpha stimulating, olfactory type                                                     |
| Gnao1   | guanine nucleotide binding protein, alpha O                                                                               |
| Gnaz    | guanine nucleotide binding protein, alpha z subunit                                                                       |
| Gnb1    | guanine nucleotide binding protein (G protein), beta 1                                                                    |
| Gnb2    | guanine nucleotide binding protein (G protein), beta 2                                                                    |
| Gnb2l1  | guanine nucleotide binding protein (G protein), beta polypeptide 2 like 1                                                 |
| Gnb4    | guanine nucleotide binding protein (G protein), beta 4                                                                    |
| Gnb5    | guanine nucleotide binding protein (G protein), beta 5                                                                    |
| Gng11   | guanine nucleotide binding protein (G protein), gamma 11                                                                  |
| Gng12   | guanine nucleotide binding protein (G protein), gamma 12                                                                  |
| Gng13   | guanine nucleotide binding protein (G protein), gamma 13                                                                  |
| Gng2    | guanine nucleotide binding protein (G protein), gamma 2                                                                   |



|           |                                                                                                                                  |
|-----------|----------------------------------------------------------------------------------------------------------------------------------|
| Gng3      | guanine nucleotide binding protein (G protein), gamma 3                                                                          |
| Gng4      | guanine nucleotide binding protein (G protein), gamma 4                                                                          |
| Gng7      | guanine nucleotide binding protein (G protein), gamma 7                                                                          |
| Gngt1     | guanine nucleotide binding protein (G protein), gamma transducing activity polypeptide 1                                         |
| Gngt2     | guanine nucleotide binding protein (G protein), gamma transducing activity polypeptide 2                                         |
| Got11     | glutamic-oxaloacetic transaminase 1-like 1                                                                                       |
| Gpr107    | G protein-coupled receptor 107; hypothetical protein LOC100047589                                                                |
| Gpr108    | G protein-coupled receptor 108                                                                                                   |
| Gpr111    | G protein-coupled receptor 111                                                                                                   |
| Gpr113    | G protein-coupled receptor 113                                                                                                   |
| Gpr128    | G protein-coupled receptor 128                                                                                                   |
| Gpr142    | G protein-coupled receptor 142                                                                                                   |
| Gpr156    | G protein-coupled receptor 156                                                                                                   |
| Gpr176    | G protein-coupled receptor 176                                                                                                   |
| Gpr177    | G protein-coupled receptor 177                                                                                                   |
| Gpr20     | G protein-coupled receptor 20                                                                                                    |
| Gpr3      | G-protein coupled receptor 3                                                                                                     |
| Gpr6      | G protein-coupled receptor 6                                                                                                     |
| Gprin1    | G protein-regulated inducer of neurite outgrowth 1                                                                               |
| Gprin2    | G protein regulated inducer of neurite outgrowth 2                                                                               |
| Gpsm1     | G-protein signalling modulator 1 (AGS3-like, C. elegans)                                                                         |
| Gpsm3     | G-protein signalling modulator 3 (AGS3-like, C. elegans)                                                                         |
| Grasp     | GRP1 (general receptor for phosphoinositides 1)-associated scaffold protein                                                      |
| Grit      | Rho GTPase activating protein 32                                                                                                 |
| Grif1     | glucocorticoid receptor DNA binding factor 1                                                                                     |
| Grtp1     | GH regulated TBC protein 1                                                                                                       |
| Grwd1     | glutamate-rich WD repeat containing 1                                                                                            |
| Gsdma1    | gasdermin A                                                                                                                      |
| Gtpbp1    | GTP binding protein 1                                                                                                            |
| Gtpbp10   | GTP-binding protein 10 (putative); predicted gene 6877                                                                           |
| Gtpbp2    | GTP binding protein 2                                                                                                            |
| Gtpbp3    | GTP binding protein 3                                                                                                            |
| Gtpbp5    | GTP binding protein 5                                                                                                            |
| Hdgfl1    | hepatoma derived growth factor-like 1                                                                                            |
| Helz      | helicase with zinc finger domain                                                                                                 |
| Hhat      | hedgehog acyltransferase                                                                                                         |
| Higd1a    | HIG1 domain family, member 1A                                                                                                    |
| Hrasls    | HRAS-like suppressor                                                                                                             |
| Hsd1      | hydroxysteroid dehydrogenase like 1                                                                                              |
| Hsd12     | hydroxysteroid dehydrogenase like 2                                                                                              |
| Hspa9-ps1 | heat shock protein 9, pseudogene 1                                                                                               |
| Htr1e     | 5-hydroxytryptamine (serotonin) receptor 1E                                                                                      |
| Iapls3-28 | intracisternal A particle, lymphocyte specific 3-28                                                                              |
| Icmt      | isoprenylcysteine carboxyl methyltransferase                                                                                     |
| Ier3ip1   | immediate early response 3 interacting protein 1; haloacid dehalogenase-like hydrolase domain containing 2; predicted gene 10784 |
| If3       | Sendai virus induced interferon 3                                                                                                |
| Ifnar2    | interferon (alpha and beta) receptor 2                                                                                           |
| Ifnz      | interferon zeta                                                                                                                  |

|           |                                                                                                                    |
|-----------|--------------------------------------------------------------------------------------------------------------------|
| Igsf11    | immunoglobulin superfamily, member 11                                                                              |
| Il22ra2   | interleukin 22 receptor, alpha 2                                                                                   |
| Il2rb     | interleukin 2 receptor, beta chain                                                                                 |
| Il3ra     | interleukin 3 receptor, alpha chain                                                                                |
| Il9r      | similar to interleukin 9 receptor; interleukin 9 receptor                                                          |
| Inpp4b    | inositol polyphosphate-4-phosphatase, type II                                                                      |
| Ints4     | integrator complex subunit 4                                                                                       |
| Ipo11     | importin 11                                                                                                        |
| Iqgap2    | IQ motif containing GTPase activating protein 2                                                                    |
| Iqgap3    | IQ motif containing GTPase activating protein 3                                                                    |
| Irf9      | interferon regulatory factor 9                                                                                     |
| Itgb1bp1  | integrin beta 1 binding protein 1                                                                                  |
| Itgb1bp2  | integrin beta 1 binding protein 2                                                                                  |
| Itgb1bp3  | integrin beta 1 binding protein 3                                                                                  |
| Itgb3bp   | predicted gene 3507; integrin beta 3 binding protein (beta3-endonexin); similar to integrin beta 3 binding protein |
| Itm2c     | integral membrane protein 2C                                                                                       |
| Kank1     | KN motif and ankyrin repeat domains 1                                                                              |
| Kank2     | KN motif and ankyrin repeat domains 2                                                                              |
| Kank3     | KN motif and ankyrin repeat domains 3                                                                              |
| Kank4     | KN motif and ankyrin repeat domains 4                                                                              |
| Kbtbd7    | kelch repeat and BTB (POZ) domain containing 7                                                                     |
| Kcmf1     | potassium channel modulatory factor 1                                                                              |
| Kdelr1    | KDEL (Lys-Asp-Glu-Leu) endoplasmic reticulum protein retention receptor 1                                          |
| Kif13b    | kinesin family member 13B                                                                                          |
| Klhdc1    | kelch domain containing 1                                                                                          |
| Klhdc2    | kelch domain containing 2                                                                                          |
| Klhl31    | Klhl3 kelch-like 3 (Drosophila)                                                                                    |
| Klhl31    | kelch-like 31 (Drosophila)                                                                                         |
| Kndc1     | kinase non-catalytic C-lobe domain (KIND) containing 1                                                             |
| Ktelc1    | KTEL (Lys-Tyr-Glu-Leu) containing 1                                                                                |
| Lancl1    | LanC (bacterial lantibiotic synthetase component C)-like 1                                                         |
| Lancl2    | LanC (bacterial lantibiotic synthetase component C)-like 2                                                         |
| Li        | lined                                                                                                              |
| Loc436194 | Gm5754 predicted gene 5754                                                                                         |
| Lphn1     | latrophilin 1                                                                                                      |
| Lrig2     | leucine-rich repeats and immunoglobulin-like domains 2                                                             |
| Lrrc26    | leucine rich repeat containing 26                                                                                  |
| Lrrc8a    | leucine rich repeat containing 8A                                                                                  |
| Lrrc8b    | leucine rich repeat containing 8 family, member B                                                                  |
| Lrrc8c    | leucine rich repeat containing 8 family, member C                                                                  |
| Lrrc8d    | leucine rich repeat containing 8D                                                                                  |
| Lrrc8e    | similar to Leucine rich repeat containing 8 family, member E; leucine rich repeat containing 8 family, member E    |
| Ly6h      | similar to Lymphocyte antigen 6H precursor (Ly-6H); lymphocyte antigen 6 complex, locus H                          |
| Mageb2    | melanoma antigen, family B, 1; melanoma antigen, family B, 2                                                       |
| Mapk13    | mitogen-activated protein kinase 13                                                                                |
| Mat2a     | methionine adenosyltransferase II, alpha                                                                           |
| Mat2b     | methionine adenosyltransferase II, beta                                                                            |
| Mcf2l     | mcf.2 transforming sequence-like                                                                                   |

|           |                                                                                                                 |
|-----------|-----------------------------------------------------------------------------------------------------------------|
| Med29     | mediator complex subunit 29; predicted gene 9450                                                                |
| Med6      | mediator of RNA polymerase II transcription, subunit 6 homolog (yeast)                                          |
| Megf11    | multiple EGF-like-domains 11                                                                                    |
| Mett11d1  | methyltransferase 11 domain containing 1                                                                        |
| Mettl3    | methyltransferase like 3                                                                                        |
| Mical1    | microtubule associated monoxygenase, calponin and LIM domain containing 1                                       |
| Micalcl   | MICAL C-terminal like                                                                                           |
| Midn      | midnolin                                                                                                        |
| Mmd       | monocyte to macrophage differentiation-associated; similar to monocyte to macrophage differentiation-associated |
| Mon1b     | MON1 homolog b (yeast)                                                                                          |
| Mprp      | myosin phosphatase Rho interacting protein; predicted gene 8086                                                 |
| Mras      | muscle and microspikes RAS                                                                                      |
| Mrpl12    | mitochondrial ribosomal protein L12                                                                             |
| Mrpl15    | mitochondrial ribosomal protein L15                                                                             |
| Mrpl2     | mitochondrial ribosomal protein L2                                                                              |
| Mrpl3     | mitochondrial ribosomal protein L3                                                                              |
| Mrpl46    | mitochondrial ribosomal protein L46                                                                             |
| Mrps25    | mitochondrial ribosomal protein S25                                                                             |
| Mrps35    | mitochondrial ribosomal protein S35                                                                             |
| Mrrf      | mitochondrial ribosome recycling factor                                                                         |
| Ms4a3     | membrane-spanning 4-domains, subfamily A, member 3                                                              |
| Ms4a5     | membrane-spanning 4-domains, subfamily A, member 5                                                              |
| Ms4a7     | membrane-spanning 4-domains, subfamily A, member 7                                                              |
| Msto1     | misato homolog 1 (Drosophila)                                                                                   |
| Mterfd3   | MTERF domain containing 3                                                                                       |
| Mtx2      | metaxin 2                                                                                                       |
| Mudeng    | MU-2/AP1M2 domain containing, death-inducing                                                                    |
| Mycbpap   | MYCBP associated protein                                                                                        |
| Myg1      | melanocyte proliferating gene 1                                                                                 |
| N6amt1    | N-6 adenine-specific DNA methyltransferase 1 (putative)                                                         |
| Naif1     | nuclear apoptosis inducing factor 1                                                                             |
| Narg2     | NMDA receptor-regulated gene 2                                                                                  |
| Nckap1    | NCK-associated protein 1                                                                                        |
| Nek3      | NIMA (never in mitosis gene a)-related expressed kinase 3                                                       |
| Net1      | predicted gene 8990; neuroepithelial cell transforming gene 1                                                   |
| Ngef      | neuronal guanine nucleotide exchange factor                                                                     |
| Ngrn      | neugrin, neurite outgrowth associated                                                                           |
| Nicn1     | nicolin 1                                                                                                       |
| Nip7      | nuclear import 7 homolog (S. cerevisiae)                                                                        |
| Nipsnap3a | nipsnap homolog 3A (C. elegans)                                                                                 |
| Nisch     | nischarin                                                                                                       |
| Nkg7      | natural killer cell group 7 sequence                                                                            |
| Nlrp12    | NLR family, pyrin domain containing 12                                                                          |
| Nlrp4e    | NLR family, pyrin domain containing 4E                                                                          |
| Nme2      | non-metastatic cells 2, protein (NM23B)                                                                         |
| Nme6      | similar to Nme6 protein; non-metastatic cells 6, protein expressed in (nucleoside-diphosphate kinase)           |
| Nme7      | non-metastatic cells 7, protein expressed in (nucleoside-diphosphate kinase)                                    |
| Nob1      | NIN1/RPN12 binding protein 1 homolog (S. cerevisiae)                                                            |

|         |                                                                                                                           |
|---------|---------------------------------------------------------------------------------------------------------------------------|
| Nol8    | nucleolar protein 8                                                                                                       |
| Npdc1   | neural proliferation, differentiation and control gene 1                                                                  |
| Nrbp1   | nuclear receptor binding protein 1                                                                                        |
| Nudt5   | nudix (nucleoside diphosphate linked moiety X)-type motif 5                                                               |
| Nxph2   | neurexophilin 2                                                                                                           |
| Odc-rs9 | ornithine decarboxylase, related sequence 9                                                                               |
| Ola1    | Obg-like ATPase 1                                                                                                         |
| Olfml1  | olfactomedin-like 1                                                                                                       |
| Olfml3  | olfactomedin-like 3                                                                                                       |
| Olf1310 | olfactory receptor 1310                                                                                                   |
| Olf1342 | olfactory receptor 1342                                                                                                   |
| Olf171  | olfactory receptor 71                                                                                                     |
| Olf1937 | olfactory receptor 937                                                                                                    |
| Olf1985 | olfactory receptor 985                                                                                                    |
| Oosp1   | oocyte secreted protein 1                                                                                                 |
| Osbpl6  | oxysterol binding protein-like 6                                                                                          |
| Osbpl7  | oxysterol binding protein-like 7                                                                                          |
| Pak1ip1 | PAK1 interacting protein 1                                                                                                |
| Pak4    | p21 protein (Cdc42/Rac)-activated kinase 4                                                                                |
| Pak6    | p21 protein (Cdc42/Rac)-activated kinase 6                                                                                |
| Pank1   | pantothenate kinase 1                                                                                                     |
| Paqr5   | progesterin and adipoQ receptor family member V                                                                           |
| Paqr6   | progesterin and adipoQ receptor family member VI; predicted gene 6821                                                     |
| Paqr7   | progesterin and adipoQ receptor family member VII                                                                         |
| Paqr8   | progesterin and adipoQ receptor family member VIII                                                                        |
| Paqr9   | progesterin and adipoQ receptor family member IX                                                                          |
| Pat1    | protein associated with topoisomerase II homolog 1 (yeast)                                                                |
| Pat2    | protein associated with topoisomerase II homolog 2 (yeast)                                                                |
| Pcdhga1 | protocadherin gamma subfamily A, 1                                                                                        |
| Pdc     | phosducin                                                                                                                 |
| Pdcl    | phosducin-like                                                                                                            |
| Pdcl3   | phosducin-like 3                                                                                                          |
| Pde6g   | phosphodiesterase 6G, cGMP-specific, rod, gamma                                                                           |
| Pde6h   | phosphodiesterase 6H, cGMP-specific, cone, gamma                                                                          |
| Pdik1l  | PDLIM1 interacting kinase 1 like                                                                                          |
| Pdzd4   | PDZ domain containing 4                                                                                                   |
| Pet2    | plasmacytoma expressed transcript 2                                                                                       |
| Pgls    | 6-phosphogluconolactonase                                                                                                 |
| Pigy    | phosphatidylinositol glycan anchor biosynthesis, class Y                                                                  |
| Pigyl   | phosphatidylinositol glycan anchor biosynthesis, class Y-like                                                             |
| Pik3cb  | phosphatidylinositol 3-kinase, catalytic, beta polypeptide                                                                |
| Pik3r3  | phosphatidylinositol 3 kinase, regulatory subunit, polypeptide 3 (p55)                                                    |
| Pik3r5  | phosphoinositide-3-kinase, regulatory subunit 5, p101                                                                     |
| Pik3r6  | phosphoinositide-3-kinase, regulatory subunit 6                                                                           |
| Pip4k2a | phosphatidylinositol-5-phosphate 4-kinase, type II, alpha                                                                 |
| Pip5k1a | phosphatidylinositol-4-phosphate 5-kinase, type 1 alpha                                                                   |
| Pip5k1b | phosphatidylinositol-4-phosphate 5-kinase, type 1 beta; similar to phosphatidylinositol 4-phosphate 5-kinase type I-alpha |
| Pip5k1c | phosphatidylinositol-4-phosphate 5-kinase, type 1 gamma                                                                   |

|          |                                                                                                    |
|----------|----------------------------------------------------------------------------------------------------|
| Pitpna   | phosphatidylinositol transfer protein, alpha                                                       |
| Pitpnb   | phosphatidylinositol transfer protein, beta                                                        |
| Pitpnc1  | phosphatidylinositol transfer protein, cytoplasmic 1                                               |
| Pitpnm1  | phosphatidylinositol transfer protein, membrane-associated 1                                       |
| Pitpnm3  | PITPNM family member 3                                                                             |
| Pkn3     | protein kinase N3                                                                                  |
| Plcb1    | phospholipase C, beta 1                                                                            |
| Plcb2    | phospholipase C, beta 2                                                                            |
| Plcb3    | phospholipase C, beta 3                                                                            |
| Plcd1    | phospholipase C, delta 1                                                                           |
| Plce1    | phospholipase C, epsilon 1                                                                         |
| Plcg2    | phospholipase C, gamma 2                                                                           |
| Plch1    | phospholipase C, eta 1                                                                             |
| Plch2    | phospholipase C, eta 2                                                                             |
| Plcl2    | phospholipase C-like 2                                                                             |
| Plek     | pleckstrin                                                                                         |
| Plek2    | pleckstrin 2                                                                                       |
| Plekha8  | pleckstrin homology domain containing, family A (phosphoinositide binding specific) member 8       |
| Plekhg5  | pleckstrin homology domain containing, family G (with RhoGef domain) member 5                      |
| Plk-ps1  | polo-like kinase, pseudogene 1                                                                     |
| Plxnb1   | plexin B1                                                                                          |
| Plxnb2   | plexin B2                                                                                          |
| Plxnb3   | plexin B3                                                                                          |
| Pno1     | partner of NOB1 homolog ( <i>S. cerevisiae</i> )                                                   |
| Pnpla8   | patatin-like phospholipase domain containing 8                                                     |
| Ppa2     | pyrophosphatase (inorganic) 2                                                                      |
| Ppan     | peter pan homolog ( <i>Drosophila</i> )                                                            |
| Ppap2b   | phosphatidic acid phosphatase type 2B                                                              |
| Ppfibp1  | PTPRF interacting protein, binding protein 1 (liprin beta 1); similar to mKIAA1230 protein         |
| Ppfibp2  | protein tyrosine phosphatase, receptor-type, F interacting protein, binding protein 2              |
| Ppil3    | peptidylprolyl isomerase (cyclophilin)-like 3                                                      |
| Ppm1b    | similar to serine/threonine phosphatase; protein phosphatase 1B, magnesium dependent, beta isoform |
| Ppm1e    | protein phosphatase 1E (PP2C domain containing)                                                    |
| Ppm1f    | protein phosphatase 1F (PP2C domain containing)                                                    |
| Ppp1r16a | protein phosphatase 1, regulatory (inhibitor) subunit 16A                                          |
| Ppp2r2a  | protein phosphatase 2 (formerly 2A), regulatory subunit B (PR 52), alpha isoform                   |
| Ppp2r2c  | protein phosphatase 2 (formerly 2A), regulatory subunit B (PR 52), gamma isoform                   |
| Ppp2r2d  | protein phosphatase 2, regulatory subunit B, delta isoform                                         |
| Ppp2r3a  | protein phosphatase 2 (formerly 2A), regulatory subunit B'', alpha; RIKEN cDNA 3222402P14 gene     |
| Ppp2r4   | protein phosphatase 2A, regulatory subunit B (PR 53)                                               |
| Ppp2r5a  | protein phosphatase 2, regulatory subunit B (B56), alpha isoform                                   |
| Ppp2r5b  | protein phosphatase 2, regulatory subunit B (B56), beta isoform                                    |
| Ppp2r5d  | protein phosphatase 2, regulatory subunit B (B56), delta isoform                                   |
| Ppp2r5e  | protein phosphatase 2, regulatory subunit B (B56), epsilon isoform                                 |
| Pptc7    | PTC7 protein phosphatase homolog ( <i>S. cerevisiae</i> )                                          |
| Prex1    | phosphatidylinositol-3,4,5-trisphosphate-dependent Rac exchange factor 1                           |
| Prkch    | protein kinase C, eta                                                                              |
| Prkd3    | protein kinase D3                                                                                  |

|          |                                                                                                          |
|----------|----------------------------------------------------------------------------------------------------------|
| Psat1    | similar to Phosphoserine aminotransferase 1; phosphoserine aminotransferase 1                            |
| Pscd3    | cytohesin 3                                                                                              |
| Pscdbp   | cytohesin 1 interacting protein                                                                          |
| Psd      | pleckstrin and Sec7 domain containing                                                                    |
| Psd4     | pleckstrin and Sec7 domain containing 4                                                                  |
| Psmg1    | proteasome (prosome, macropain) assembly chaperone 1                                                     |
| Ptcd3    | pentatricopeptide repeat domain 3                                                                        |
| Ptgr2    | prostaglandin reductase 2                                                                                |
| Ptplad1  | protein tyrosine phosphatase-like A domain containing 1                                                  |
| Ptplb    | predicted gene 7908; protein tyrosine phosphatase-like (proline instead of catalytic arginine), member b |
| Ptprb    | protein tyrosine phosphatase, receptor type, B                                                           |
| Pwp1     | PWP1 homolog ( <i>S. cerevisiae</i> )                                                                    |
| Rab37    | RAB37, member of RAS oncogene family                                                                     |
| Rab711   | RAB7, member RAS oncogene family-like 1                                                                  |
| Rabgef1  | similar to Ras negative regulator Rabex-5/Rin2; RAB guanine nucleotide exchange factor (GEF) 1           |
| Rac3     | RAS-related C3 botulinum substrate 3                                                                     |
| Racgap1  | Rac GTPase-activating protein 1; predicted gene 1859                                                     |
| Rala     | v-ral simian leukemia viral oncogene homolog A (ras related)                                             |
| Ralb     | v-ral simian leukemia viral oncogene homolog B (ras related)                                             |
| Ralbp1   | ralA binding protein 1                                                                                   |
| Ralgapa2 | Ral GTPase activating protein, alpha subunit 2 (catalytic)                                               |
| Ralgapb  | Ralgapb Ral GTPase activating protein, beta subunit (non-catalytic)                                      |
| Ralgds   | ral guanine nucleotide dissociation stimulator                                                           |
| Ralgps1  | Ral GEF with PH domain and SH3 binding motif 1                                                           |
| Ralgps2  | Ral GEF with PH domain and SH3 binding motif 2                                                           |
| Ranbp10  | RAN binding protein 10                                                                                   |
| Ranbp3   | RAN binding protein 3                                                                                    |
| Rap1b    | RAS related protein 1b; similar to GTP-binding protein (smg p21B)                                        |
| Rap1gap  | Rap1 GTPase-activating protein                                                                           |
| Rap1gds1 | similar to RAP1, GTP-GDP dissociation stimulator 1; RAP1, GTP-GDP dissociation stimulator 1              |
| Rap2a    | RAS related protein 2a                                                                                   |
| Rap2b    | RAP2B, member of RAS oncogene family                                                                     |
| Rapgef1  | Rap guanine nucleotide exchange factor (GEF) 1                                                           |
| Rapgef2  | Rap guanine nucleotide exchange factor (GEF) 2                                                           |
| Rapgef3  | Rap guanine nucleotide exchange factor (GEF) 3                                                           |
| Rapgef4  | Rap guanine nucleotide exchange factor (GEF) 4                                                           |
| Rapgef11 | Rap guanine nucleotide exchange factor (GEF)-like 1                                                      |
| Rarg     | retinoic acid receptor, gamma                                                                            |
| Rasa2    | RAS p21 protein activator 2                                                                              |
| Rasa3    | RAS p21 protein activator 3                                                                              |
| Rasa4    | RAS p21 protein activator 4                                                                              |
| Rasal1   | RAS protein activator like 1 (GAP1 like)                                                                 |
| Rasd1    | RAS, dexamethasone-induced 1                                                                             |
| Rasd2    | RASD family, member 2                                                                                    |
| Rasgrf1  | RAS protein-specific guanine nucleotide-releasing factor 1                                               |
| Rasgrf2  | RAS protein-specific guanine nucleotide-releasing factor 2                                               |
| Rasgrp1  | RAS guanyl releasing protein 1                                                                           |
| Rasgrp2  | RAS, guanyl releasing protein 2                                                                          |

|         |                                                                                     |
|---------|-------------------------------------------------------------------------------------|
| Rasgrp3 | RAS, guanyl releasing protein 3                                                     |
| Rasgrp4 | RAS guanyl releasing protein 4                                                      |
| Rasl11b | RAS-like, family 11, member B                                                       |
| Rbj     | DnaJ (Hsp40) homolog, subfamily C, member 27                                        |
| Rbm27   | RNA binding motif protein 27                                                        |
| Rcl1    | RNA terminal phosphate cyclase-like 1                                               |
| Rel1    | RELT-like 1                                                                         |
| Rel2    | RELT-like 2                                                                         |
| Rem1    | rad and gem related GTP binding protein 1                                           |
| Reps1   | RalBP1 associated Eps domain containing protein                                     |
| Reps2   | RALBP1 associated Eps domain containing protein 2                                   |
| Rgnef   | Rho-guanine nucleotide exchange factor                                              |
| Rgs1    | regulator of G-protein signaling 1                                                  |
| Rgs10   | regulator of G-protein signalling 10                                                |
| Rgs11   | regulator of G-protein signaling 11; similar to regulator of G-protein signaling 11 |
| Rgs12   | regulator of G-protein signaling 12                                                 |
| Rgs13   | regulator of G-protein signaling 13                                                 |
| Rgs14   | regulator of G-protein signaling 14                                                 |
| Rgs16   | regulator of G-protein signaling 16                                                 |
| Rgs17   | regulator of G-protein signaling 17                                                 |
| Rgs18   | regulator of G-protein signaling 18                                                 |
| Rgs19   | regulator of G-protein signaling 19; similar to Regulator of G-protein signaling 19 |
| Rgs2    | regulator of G-protein signaling 2                                                  |
| Rgs20   | regulator of G-protein signaling 20                                                 |
| Rgs22   | regulator of G-protein signalling 22                                                |
| Rgs3    | regulator of G-protein signaling 3                                                  |
| Rgs4    | regulator of G-protein signaling 4                                                  |
| Rgs5    | regulator of G-protein signaling 5                                                  |
| Rgs6    | regulator of G-protein signaling 6                                                  |
| Rgs7    | regulator of G protein signaling 7                                                  |
| Rgs7bp  | regulator of G-protein signalling 7 binding protein                                 |
| Rgs8    | regulator of G-protein signaling 8                                                  |
| Rgs9    | regulator of G-protein signaling 9                                                  |
| Rgs9bp  | regulator of G-protein signalling 9 binding protein                                 |
| Rhbd11  | rhomboid, veinlet-like 1 (Drosophila)                                               |
| Rheb    | Ras homolog enriched in brain; similar to RAS-homolog enriched in brain             |
| Rhebl1  | Ras homolog enriched in brain like 1                                                |
| Rhod    | ras homolog gene family, member D                                                   |
| Rhog    | ras homolog gene family, member G                                                   |
| Rhoh    | ras homolog gene family, member H                                                   |
| Rhoj    | ras homolog gene family, member J                                                   |
| Rhoq    | ras homolog gene family, member Q                                                   |
| Rhot1   | ras homolog gene family, member T1                                                  |
| Rhot2   | ras homolog gene family, member T2                                                  |
| Rhou    | ras homolog gene family, member U                                                   |
| Rhov    | ras homolog gene family, member V                                                   |
| Rhpn2   | rhophilin, Rho GTPase binding protein 2                                             |
| Ric8    | resistance to inhibitors of cholinesterase 8 homolog (C. elegans)                   |

|         |                                                                                                              |
|---------|--------------------------------------------------------------------------------------------------------------|
| Ric8b   | resistance to inhibitors of cholinesterase 8 homolog B ( <i>C. elegans</i> )                                 |
| Rin1    | Ras and Rab interactor 1                                                                                     |
| Riok1   | RIO kinase 1 (yeast)                                                                                         |
| Riok2   | RIO kinase 2 (yeast)                                                                                         |
| Riok3   | RIO kinase 3 (yeast)                                                                                         |
| Ripk4   | receptor-interacting serine-threonine kinase 4                                                               |
| Rit1    | Ras-like without CAAX 1                                                                                      |
| Rit2    | Ras-like without CAAX 2                                                                                      |
| Rnd1    | Rho family GTPase 1                                                                                          |
| Rnd3    | Rho family GTPase 3                                                                                          |
| Rnu5g   | RNA, U5G small nuclear                                                                                       |
| Rod1    | ROD1 regulator of differentiation 1 ( <i>S. pombe</i> )                                                      |
| Ropn1   | ropporin, rhopilin associated protein 1                                                                      |
| Rpl28   | predicted gene 13226; predicted gene 15435; ribosomal protein L28; predicted gene 12938                      |
| Rpl35   | ribosomal protein L35; predicted gene 10269; predicted gene 8444; predicted gene 2000; predicted gene 4342   |
| Rpl36al | ribosomal protein L36A-like                                                                                  |
| Rpl37   | ribosomal protein L37                                                                                        |
| Rpl37a  | ribosomal protein L37a; predicted gene 4149; predicted gene 4613; predicted gene 14251; predicted gene 14173 |
| Rpl8    | ribosomal protein L8; similar to 60S ribosomal protein L8                                                    |
| Rps28   | ribosomal protein S28                                                                                        |
| Rps29   | ribosomal protein S29                                                                                        |
| Rps6kc1 | ribosomal protein S6 kinase polypeptide 1                                                                    |
| Rras    | Harvey rat sarcoma oncogene, subgroup R                                                                      |
| Rras2   | related RAS viral (r-ras) oncogene homolog 2                                                                 |
| Rrp15   | ribosomal RNA processing 15 homolog ( <i>S. cerevisiae</i> )                                                 |
| Rsu1    | Ras suppressor protein 1                                                                                     |
| Rtcd1   | RNA terminal phosphate cyclase domain 1                                                                      |
| Rtkn    | rhotekin                                                                                                     |
| Rufy2   | RUN and FYVE domain-containing 2                                                                             |
| Rwdd1   | predicted gene 12693; RWD domain containing 1; predicted gene 13743                                          |
| S100a16 | S100 calcium binding protein A16                                                                             |
| Sacm1l  | SAC1 (suppressor of actin mutations 1, homolog)-like ( <i>S. cerevisiae</i> )                                |
| Samd9l  | sterile alpha motif domain containing 9-like                                                                 |
| Sap30bp | similar to transcriptional regulator protein; SAP30 binding protein                                          |
| Saps3   | SAPS domain family, member 3                                                                                 |
| Sav1    | similar to WW45 protein; salvador homolog 1 ( <i>Drosophila</i> )                                            |
| Sbk1    | SH3-binding kinase 1                                                                                         |
| Sc4mol  | sterol-C4-methyl oxidase-like                                                                                |
| Scand1  | SCAN domain-containing 1                                                                                     |
| Sdad1   | SDA1 domain containing 1; similar to SDA1 domain containing 1                                                |
| Sec14l3 | SEC14-like 3 ( <i>S. cerevisiae</i> )                                                                        |
| Sec14l4 | SEC14-like 4 ( <i>S. cerevisiae</i> )                                                                        |
| Sec16b  | SEC16 homolog B ( <i>S. cerevisiae</i> )                                                                     |
| Sectm1a | secreted and transmembrane 1A                                                                                |
| Sectm1b | secreted and transmembrane 1B                                                                                |
| Sept14  | septin 14                                                                                                    |
| Serinc1 | serine incorporator 1                                                                                        |
| Serinc2 | serine incorporator 2; hypothetical protein LOC100044221                                                     |



|          |                                                                                 |
|----------|---------------------------------------------------------------------------------|
| Serinc3  | serine incorporator 3                                                           |
| Serinc4  | Serinc4 serine incorporator 4                                                   |
| Serinc5  | serine incorporator 5                                                           |
| Sfxn4    | sideroflexin 4                                                                  |
| Sgsm1    | small G protein signaling modulator 1                                           |
| Sgsm2    | small G protein signaling modulator 2                                           |
| Sgsm3    | small G protein signaling modulator 3                                           |
| Sh2d3c   | SH2 domain containing 3C                                                        |
| Sh3bgrl  | SH3-binding domain glutamic acid-rich protein like                              |
| Shoc2    | soc-2 (suppressor of clear) homolog (C. elegans)                                |
| Sidt1    | SID1 transmembrane family, member 1                                             |
| Sirpb1   | signal-regulatory protein beta 1                                                |
| Slc10a7  | solute carrier family 10 (sodium/bile acid cotransporter family), member 7      |
| Slc25a21 | solute carrier family 25 (mitochondrial oxodicarboxylate carrier), member 21    |
| Slc25a41 | solute carrier family 25, member 41                                             |
| Slc33a1  | solute carrier family 33 (acetyl-CoA transporter), member 1                     |
| Slc35a4  | predicted gene 5866; solute carrier family 35, member A4                        |
| Slc35b2  | solute carrier family 35, member B2                                             |
| Slc41a3  | solute carrier family 41, member 3                                              |
| Slfn4    | schlafen 4                                                                      |
| Slfn9    | similar to putative protein; schlafen 9; similar to schlafen 9                  |
| Slitrk2  | SLIT and NTRK-like family, member 2                                             |
| Slitrk4  | SLIT and NTRK-like family, member 4                                             |
| Sltm     | SAFB-like, transcription modulator                                              |
| Smad-ps1 | MAD homolog, pseudogene 1 (Drosophila)                                          |
| Smpdl3a  | sphingomyelin phosphodiesterase, acid-like 3A                                   |
| Snx13    | sorting nexin 13                                                                |
| Snx21    | sorting nexin family member 21                                                  |
| Snx26    | sorting nexin family member 26                                                  |
| Sos1     | son of sevenless homolog 1 (Drosophila)                                         |
| Sos2     | son of sevenless homolog 2 (Drosophila)                                         |
| Spata17  | spermatogenesis associated 17                                                   |
| Spata3   | spermatogenesis associated 3                                                    |
| Specc1   | sperm antigen with calponin homology and coiled-coil domains 1                  |
| Spg21    | spastic paraplegia 21 homolog (human); similar to spastic paraplegia 21 homolog |
| Spin2    | spindlin family, member 2                                                       |
| Spire2   | spire homolog 2 (Drosophila)                                                    |
| Spnb5    | spectrin beta 5                                                                 |
| Spryd4   | SPRY domain containing 4                                                        |
| Srgap1   | SLIT-ROBO Rho GTPase activating protein 1                                       |
| Srgap2   | SLIT-ROBO Rho GTPase activating protein 2                                       |
| Srgap3   | SLIT-ROBO Rho GTPase activating protein 3                                       |
| St5      | suppression of tumorigenicity 5                                                 |
| Stard10  | START domain containing 10                                                      |
| Stard9   | START domain containing 9                                                       |
| Stk33    | serine/threonine kinase 33                                                      |
| Suclg1   | succinate-CoA ligase, GDP-forming, alpha subunit                                |
| Svep1    | sushi, von Willebrand factor type A, EGF and pentraxin domain containing 1      |

|               |                                                                                                                                                |
|---------------|------------------------------------------------------------------------------------------------------------------------------------------------|
| Syap1         | synapse associated protein 1                                                                                                                   |
| Syf2          | SYF2 homolog, RNA splicing factor ( <i>S. cerevisiae</i> )                                                                                     |
| Tbc1d2        | TBC1 domain family, member 2                                                                                                                   |
| Tcf25         | transcription factor 25 (basic helix-loop-helix)                                                                                               |
| Tex2          | testis expressed gene 2                                                                                                                        |
| Tg(tgfb1)1der | transgene insertion 1, Dennis R Roop                                                                                                           |
| Tiam2         | T-cell lymphoma invasion and metastasis 2                                                                                                      |
| Timm44        | translocase of inner mitochondrial membrane 44                                                                                                 |
| Tlk2          | predicted gene 13161; tousled-like kinase 2 ( <i>Arabidopsis</i> )                                                                             |
| Tln2          | talin 2                                                                                                                                        |
| Tm4sf5        | transmembrane 4 superfamily member 5                                                                                                           |
| Tm9sf1        | transmembrane 9 superfamily member 1                                                                                                           |
| Tm9sf3        | transmembrane 9 superfamily member 3                                                                                                           |
| Tmem11        | transmembrane protein 11                                                                                                                       |
| Tmem150       | transmembrane protein 150                                                                                                                      |
| Tmem159       | transmembrane protein 159                                                                                                                      |
| Tmem16e       | transmembrane protein 16e                                                                                                                      |
| Tmem16f       | transmembrane protein 16f                                                                                                                      |
| Tmem22        | transmembrane protein 22                                                                                                                       |
| Tmem30b       | transmembrane protein 30B                                                                                                                      |
| Tmem30c       | transmembrane protein 30C                                                                                                                      |
| Tmem33        | transmembrane protein 33                                                                                                                       |
| Tmem8         | transmembrane protein 8 (five membrane-spanning domains)                                                                                       |
| Tmem85        | transmembrane protein 85                                                                                                                       |
| Tnik          | TRAF2 and NCK interacting kinase                                                                                                               |
| Tnk1          | tyrosine kinase, non-receptor, 1                                                                                                               |
| Tnk2          | tyrosine kinase, non-receptor, 2                                                                                                               |
| Tob2          | transducer of ERBB2, 2                                                                                                                         |
| Tomm7         | similar to translocase of outer mitochondrial membrane 7 homolog; translocase of outer mitochondrial membrane 7 homolog (yeast)                |
| Tpd52-ps      | tumor protein D52, pseudogene                                                                                                                  |
| Tpt1p         | predicted gene 1974; tumor protein, translationally-controlled 1 pseudogene; tumor protein, translationally-controlled 1; predicted gene 14456 |
| Tpt1-ps1      | tumor protein, translationally-controlled, pseudogene 1                                                                                        |
| Trappc9       | trafficking protein particle complex 9                                                                                                         |
| Trcg1         | taste receptor protein 1                                                                                                                       |
| Trim14        | tripartite motif-containing 14                                                                                                                 |
| Trim45        | tripartite motif-containing 45                                                                                                                 |
| Trim47        | tripartite motif-containing 47                                                                                                                 |
| Trim69        | tripartite motif-containing 69                                                                                                                 |
| Trio          | triple functional domain (PTPRF interacting)                                                                                                   |
| Trnp1         | TMF1-regulated nuclear protein 1                                                                                                               |
| Trp53i13      | transformation related protein 53 inducible protein 13                                                                                         |
| Trp53tg5      | transformation related protein 53 target 5                                                                                                     |
| Trpd52l3      | tumor protein D52-like 3                                                                                                                       |
| Trpt1         | tRNA phosphotransferase 1                                                                                                                      |
| Tssk3         | testis-specific serine kinase 3                                                                                                                |
| Ttc1          | tetratricopeptide repeat domain 1                                                                                                              |
| Tulp3         | tubby-like protein 3                                                                                                                           |
| Twf2          | twinfilin, actin-binding protein, homolog 2 ( <i>Drosophila</i> )                                                                              |

|         |                                                           |
|---------|-----------------------------------------------------------|
| Ube2w   | ubiquitin-conjugating enzyme E2W (putative)               |
| Ubl7    | ubiquitin-like 7 (bone marrow stromal cell-derived)       |
| Ubtcd2  | ubiquitin domain containing 2                             |
| Ubxtd5  | UBX domain protein 11                                     |
| Umpk-ps | uridine monophosphate kinase, pseudogene                  |
| Unc50   | unc-50 homolog (C. elegans)                               |
| Usmg5   | upregulated during skeletal muscle growth 5               |
| Usp6nl  | USP6 N-terminal like                                      |
| Usp-ps  | ubiquitin specific peptidase, pseudogene (USP17 homolog)  |
| Vav1    | vav 1 oncogene                                            |
| Vav2    | vav 2 oncogene                                            |
| Vrk3    | vaccinia related kinase 3                                 |
| Wdr12   | WD repeat domain 12; predicted gene 4879                  |
| Wdr13   | WD repeat domain 13                                       |
| Wdr16   | WD repeat domain 16                                       |
| Wdr25   | WD repeat domain 25                                       |
| Wdr3    | WD repeat domain 3                                        |
| Wdr45   | WD repeat domain 45                                       |
| Wdr6    | WD repeat domain 6                                        |
| Xrra1   | X-ray radiation resistance associated 1                   |
| Yme111  | YME1-like 1 (S. cerevisiae)                               |
| Ypel1   | yippee-like 1 (Drosophila)                                |
| Ypel3   | yippee-like 3 (Drosophila)                                |
| Zdhhc16 | zinc finger, DHHC domain containing 16                    |
| Zdhhc7  | zinc finger, DHHC domain containing 7                     |
| Zfand2a | zinc finger, AN1-type domain 2A                           |
| Zfand6  | zinc finger, AN1-type domain 6                            |
| Zfp113  | zinc finger protein 113                                   |
| Zfp12   | zinc finger protein 12                                    |
| Zfp212  | Zinc finger protein 212                                   |
| Zfp263  | zinc finger protein 263                                   |
| Zfp319  | zinc finger protein 319                                   |
| Zfp322a | zinc finger protein 322A                                  |
| Zfp326  | zinc finger protein 326                                   |
| Zfp383  | zinc finger protein 383                                   |
| Zfp414  | zinc finger protein 414                                   |
| Zfp418  | zinc finger protein 418                                   |
| Zfp445  | zinc finger protein 445                                   |
| Zfp449  | zinc finger protein 449                                   |
| Zfp458  | zinc finger protein 458                                   |
| Zfp58   | zinc finger protein 58                                    |
| Zfp612  | zinc finger protein 612                                   |
| Zfp622  | zinc finger protein 622                                   |
| Zfp641  | zinc finger protein 641                                   |
| Zfp689  | zinc finger protein 689                                   |
| Zfp74   | zinc finger protein 74; hypothetical protein LOC100044255 |
| Zfp97   | zinc finger protein 97; cDNA sequence BC018101            |
| Zfyve27 | zinc finger, FYVE domain containing 27                    |

**Table S19. Arrestin signaling theoretical dataset.** The Arrestin signaling dataset represents the intersection between the cellular signaling and Arrestin theoretical datasets.

| Gene Symbol   | Gene Definition                                                                          |
|---------------|------------------------------------------------------------------------------------------|
| 751864        | Gm9733 predicted gene 9733                                                               |
| Acvr1b        | activin A receptor, type IB                                                              |
| Acvr1c        | activin A receptor, type IC                                                              |
| Acvr2a        | activin A receptor, type IIA                                                             |
| Acvr2b        | activin A receptor, type IIB                                                             |
| Akap5         | A kinase (PRKA) anchor protein 5                                                         |
| Als2cr2       | amyotrophic lateral sclerosis 2 (juvenile) chromosome region, candidate 2                |
| Arrdc2        | arrestin domain containing 2                                                             |
| Arrdc3        | arrestin domain containing 3                                                             |
| Atp5f1        | similar to ATP synthase, H+ transporting, mitochondrial F0 complex, subunit b, isoform 1 |
| Atp5k         | ATP synthase, H+ transporting, mitochondrial F1F0 complex, subunit e                     |
| Atpaf1        | ATP synthase mitochondrial F1 complex assembly factor 1                                  |
| Aup1          | ancient ubiquitous protein 1                                                             |
| B230339m05rik | B230339m05rik                                                                            |
| Bc023829      | cDNA sequence BC023829                                                                   |
| Cab39         | calcium binding protein 39                                                               |
| Camk1g        | calcium/calmodulin dependent protein kinase IG                                           |
| Cd3g          | CD3 antigen, gamma polypeptide                                                           |
| Cd84          | CD84 molecule                                                                            |
| Cdc42bpb      | CDC42 binding protein kinase beta (DMPK like)                                            |
| Cds2          | CDP diacylglycerol synthase (phosphatidate cytidyltransferase) 2                         |
| Cetn4         | centrin 4                                                                                |
| Cnga4         | cyclic nucleotide gated channel alpha 4                                                  |
| Csf2ra        | colony stimulating factor 2 receptor, alpha, low affinity (granulocyte macrophage)       |
| Csf2rb        | colony stimulating factor 2 receptor, beta, low affinity (granulocyte macrophage)        |
| Csf2rb2       | colony stimulating factor 2 receptor, beta 2, low affinity (granulocyte macrophage)      |
| Csnk1g1       | casein kinase 1, gamma 1                                                                 |
| Csnk1g3       | casein kinase 1, gamma 3                                                                 |
| D10mit271     | DNA Segment, Chr 10, Massachusetts Institute of Technology 271                           |
| D14mit173     | DNA segment, Chr 14, Massachusetts Institute of Technology 173                           |
| D14mit56      | DNA segment, Chr 14, Massachusetts Institute of Technology 56                            |
| Dak           | dihydroxyacetone kinase 2 homolog (S. cerevisiae)                                        |
| Dgkb          | diacylglycerol kinase, beta                                                              |
| Dgkd          | diacylglycerol kinase, delta                                                             |
| Dgkg          | diacylglycerol kinase, gamma                                                             |
| Dgkq          | diacylglycerol kinase, theta                                                             |
| Dhrs3         | dehydrogenase/reductase (SDR family) member 3                                            |
| Dnajc14       | DnaJ (Hsp40) homolog, subfamily C, member 14                                             |
| Dub1          | deubiquitinating enzyme 1; similar to DUB                                                |
| Dub3          | deubiquitinating enzyme 3                                                                |
| Dub4          | deubiquitinating enzyme 4                                                                |

|          |                                                                                          |
|----------|------------------------------------------------------------------------------------------|
| Dusp16   | dual specificity phosphatase 16                                                          |
| Ebi2     | Epstein-Barr virus induced gene 2 (lymphocyte specific G protein)                        |
| Eg627648 | Eg627648                                                                                 |
| Eif3i    | eukaryotic translation initiation factor 3, subunit I                                    |
| Etv2     | similar to ETS related protein 71; ets variant gene 2                                    |
| Fitm1    | fat storage-inducing transmembrane protein 1                                             |
| Fiz1     | FLT3 interacting zinc finger 1                                                           |
| Galm     | galactose mutarotase                                                                     |
| Gipc3    | GIPC PDZ domain containing family, member 3                                              |
| Glucos1  | glucose homeostasis QTL 1                                                                |
| Gna14    | guanine nucleotide binding protein, alpha 14                                             |
| Gna15    | guanine nucleotide binding protein, alpha 15                                             |
| Gnal     | guanine nucleotide binding protein, alpha stimulating, olfactory type                    |
| Gnat3    | guanine nucleotide binding protein, alpha transducing 3                                  |
| Gnaz     | guanine nucleotide binding protein, alpha z subunit                                      |
| Gnb1     | guanine nucleotide binding protein (G protein), beta 1                                   |
| Gnb2     | guanine nucleotide binding protein (G protein), beta 2                                   |
| Gnb211   | guanine nucleotide binding protein (G protein), beta polypeptide 2 like 1                |
| Gnb4     | guanine nucleotide binding protein (G protein), beta 4                                   |
| Gnb5     | guanine nucleotide binding protein (G protein), beta 5                                   |
| Gng11    | guanine nucleotide binding protein (G protein), gamma 11                                 |
| Gng12    | guanine nucleotide binding protein (G protein), gamma 12                                 |
| Gng13    | guanine nucleotide binding protein (G protein), gamma 13                                 |
| Gng2     | guanine nucleotide binding protein (G protein), gamma 2                                  |
| Gng3     | guanine nucleotide binding protein (G protein), gamma 3                                  |
| Gng4     | guanine nucleotide binding protein (G protein), gamma 4                                  |
| Gng7     | guanine nucleotide binding protein (G protein), gamma 7                                  |
| Gngt1    | guanine nucleotide binding protein (G protein), gamma transducing activity polypeptide 1 |
| Gngt2    | guanine nucleotide binding protein (G protein), gamma transducing activity polypeptide 2 |
| Gpr111   | G protein coupled receptor 111                                                           |
| Gpr128   | G protein coupled receptor 128                                                           |
| Gpr142   | G protein coupled receptor 142                                                           |
| Gpr156   | G protein coupled receptor 156                                                           |
| Gpr177   | G protein coupled receptor 177                                                           |
| Gpr20    | G protein coupled receptor 20                                                            |
| Gpr3     | G protein coupled receptor 3                                                             |
| Gpr61    | G protein coupled receptor 61                                                            |
| Gprin2   | G protein regulated inducer of neurite outgrowth 2                                       |
| Gpsm3    | G protein signaling modulator 3 (AGS3 like, C. elegans)                                  |
| Gucy2f   | guanylate cyclase 2f                                                                     |
| Higd1a   | HIG1 domain family, member 1A                                                            |
| Htr1e    | 5 hydroxytryptamine (serotonin) receptor 1E                                              |
| Ifnar2   | interferon (alpha and beta) receptor 2                                                   |
| Ifnz     | interferon zeta                                                                          |
| Il3ra    | interleukin 3 receptor, alpha chain                                                      |
| Il5ra    | interleukin 5 receptor, alpha                                                            |
| Inpp4b   | inositol polyphosphate 4, type II                                                        |
| Irf9     | interferon regulatory factor 9                                                           |

|                    |                                                                                      |
|--------------------|--------------------------------------------------------------------------------------|
| Itgb1bp1           | integrin beta 1 binding protein 1                                                    |
| Itgb1bp2           | integrin beta 1 binding protein 2                                                    |
| Itgb1bp3           | integrin beta 1 binding protein 3                                                    |
| Itgb3bp            | integrin beta 3 binding protein (beta3 endonexin)                                    |
| Kif3a              | kinesin family member 3A                                                             |
| Lgr6               | leucine rich repeat containing G protein                                             |
| Map2k7             | mitogen activated protein kinase kinase 7                                            |
| Map3k5             | mitogen activated protein kinase kinase kinase 5                                     |
| Map3k6             | mitogen activated protein kinase kinase kinase 6                                     |
| Mapbpip            | similar to Late endosomal/lysosomal Mp1 interacting protein (p14)                    |
| Mapk13             | mitogen activated protein kinase 13                                                  |
| Mapk8ip1           | mitogen activated protein kinase 8 interacting protein 1                             |
| Mapk8ip2           | mitogen activated protein kinase 8 interacting protein 2                             |
| Mapk8ip3           | mitogen activated protein kinase 8 interacting protein 3                             |
| Mat2a              | methionine adenosyltransferase II, alpha                                             |
| Mat2b              | methionine adenosyltransferase II, beta                                              |
| Med6               | mediator of RNA polymerase II transcription, subunit 6 homolog (yeast)               |
| Mrgprb2            | MAS related GPR, member B2                                                           |
| Mrgpre             | MAS related GPR, member E                                                            |
| Ms4a3              | membrane spanning 4 domains, subfamily A, member 3                                   |
| Ms4a5              | membrane spanning 4 domains, subfamily A, member 5                                   |
| Nme2               | non metastatic cells 2                                                               |
| Nme7               | non metastatic cells 7                                                               |
| Odc-rs9            | ornithine decarboxylase, related sequence 9                                          |
| Olf1310            | olfactory receptor 1310                                                              |
| Olf1342            | olfactory receptor 1342                                                              |
| Olf410             | olfactory receptor 410                                                               |
| Olf412             | olfactory receptor 412                                                               |
| Olf705             | olfactory receptor 705                                                               |
| Olf71              | olfactory receptor 71                                                                |
| Olf937             | olfactory receptor 937                                                               |
| Olf985             | olfactory receptor 985                                                               |
| Ottmusg00000011291 | Ottmusg00000011291                                                                   |
| Otud5              | OTU domain containing 5                                                              |
| Pank1              | pantothenate kinase 1                                                                |
| Paqr5              | progesterin and adipoQ receptor family member V                                      |
| Paqr7              | progesterin and adipoQ receptor family member VII                                    |
| Paqr8              | progesterin and adipoQ receptor family member VIII                                   |
| Pcdhga1            | protocadherin gamma subfamily A, 1                                                   |
| Pdc                | phosducin                                                                            |
| Pdcl               | phosducin-like                                                                       |
| Pde4d              | phosphodiesterase 4D, cAMP specific (phosphodiesterase E3 dunce homolog, Drosophila) |
| Pde6g              | phosphodiesterase 6G, cGMP specific, rod, gamma                                      |
| Pde6h              | phosphodiesterase 6H, cGMP specific, cone, gamma                                     |
| Pik3r5             | phosphoinositide 3 kinase, regulatory subunit 5, p101                                |
| Pik3r6             | phosphoinositide 3 kinase, regulatory subunit 6                                      |
| Pip5k1a            | phosphatidylinositol 4 phosphate 5-kinase, type I, alpha                             |
| Pip5k1c            | phosphatidylinositol-4-phosphate 5-kinase, type I, gamma                             |

|          |                                                                                               |
|----------|-----------------------------------------------------------------------------------------------|
| Pitpnb   | phosphatidylinositol transfer protein, beta                                                   |
| Pitpnc1  | phosphatidylinositol transfer protein, cytoplasmic 1                                          |
| Pitpnm2  | phosphatidylinositol transfer protein, membrane associated 2                                  |
| Pitpnm3  | PITPNM family member 3                                                                        |
| Plcb1    | phospholipase C, beta 1 (phosphoinositide specific)                                           |
| Plcb2    | phospholipase C, beta 2 (phosphatidylinositol specific)                                       |
| Plcb3    | phospholipase C, beta 3 (phosphatidylinositol specific)                                       |
| Plcd1    | phospholipase C, delta 1                                                                      |
| Plch1    | phospholipase C, eta 1                                                                        |
| Plcl2    | phospholipase C-like 2                                                                        |
| Plek     | pleckstrin                                                                                    |
| Pnpla8   | patatin like phospholipase domain containing 8                                                |
| Ppap2b   | phosphatidic acid phosphatase type 2B                                                         |
| Ppfibp1  | PTPRF interacting protein, binding protein 1 (liprin beta 1)                                  |
| Ppm1b    | protein phosphatase 1B (formerly 2C), magnesium dependent, beta isoform                       |
| Ppm1e    | protein phosphatase 1E (PP2C domain containing)                                               |
| Ppp2r2a  | protein phosphatase 2 (formerly 2A), regulatory subunit B, alpha isoform                      |
| Ppp2r2c  | protein phosphatase 2 (formerly 2A), regulatory subunit B, gamma isoform                      |
| Ppp2r2d  | protein phosphatase 2, regulatory subunit B, delta isoform                                    |
| Ppp2r3a  | protein phosphatase 2 (formerly 2A), regulatory subunit B', alpha; RIKEN cDNA 3222402P14 gene |
| Ppp2r4   | protein phosphatase 2A activator, regulatory subunit 4                                        |
| Ppp2r5a  | protein phosphatase 2, regulatory subunit B', alpha isoform                                   |
| Ppp2r5b  | protein phosphatase 2, regulatory subunit B', beta isoform                                    |
| Ppp2r5d  | protein phosphatase 2, regulatory subunit B (B56), delta isoform                              |
| Ppp2r5e  | protein phosphatase 2, regulatory subunit B (B56), epsilon isoform                            |
| Psat1    | phosphoserine aminotransferase 1                                                              |
| Psmg1    | proteasome (prosome, macropain) assembly chaperone 1                                          |
| Ptprb    | protein tyrosine phosphatase, receptor type, B                                                |
| Rdh11    | retinol dehydrogenase 11                                                                      |
| Rem1     | rad and gem related GTP binding protein 1                                                     |
| Rgs11    | regulator of G protein signaling 11                                                           |
| Rgs7     | regulator of G protein signaling 7                                                            |
| Rgs7bp   | regulator of G protein signaling 7 binding protein                                            |
| Rgs9     | regulator of G protein signaling 9                                                            |
| Rgs9bp   | regulator of G protein signaling 9 binding protein                                            |
| Rtp1     | receptor (chemosensory) transporter protein 1                                                 |
| Rxfp4    | relaxin/insulin like family peptide receptor 4                                                |
| Sap30bp  | similar to transcriptional regulator protein; SAP30 binding protein                           |
| Sarm1    | sterile alpha and TIR motif containing 1                                                      |
| Sctr     | secretin receptor                                                                             |
| Sh2d1b1  | SH2 domain protein 1B1                                                                        |
| Sh2d1b2  | SH2 domain protein 1B2                                                                        |
| Slamf9   | SLAM family member 9                                                                          |
| Spg21    | spastic paraplegia 21 homolog (human); similar to spastic paraplegia 21 homolog               |
| Spnb5    | spectrin beta 5                                                                               |
| Stambpl1 | STAM binding protein like 1                                                                   |
| Sucla2   | succinate CoA ligase, ADP forming, beta subunit                                               |
| Suclg1   | succinate CoA ligase, alpha subunit                                                           |

|               |                                                    |
|---------------|----------------------------------------------------|
| Tg(tgfb1)1der | transgene insertion 1, Dennis R Roop               |
| Tln2          | talin 2                                            |
| Tmem11        | transmembrane protein 11                           |
| Tmem181       | transmembrane protein 181                          |
| Tmem185b      | transmembrane protein 185b                         |
| Trappc9       | trafficking protein particle complex 9             |
| Treh          | trehalase (brush border membrane glycoprotein)     |
| Tulp3         | tubby like protein 3                               |
| Umpk-ps       | uridine monophosphate kinase, pseudogene           |
| Unc119        | unc 119 homolog (C. elegans)                       |
| Xpc4          | exportin 4                                         |
| Yes1          | v-yes 1 Yamaguchi sarcoma viral oncogene homolog 1 |
| Zdhhc7        | zinc finger, DHHC domain containing 7              |
| Zfp414        | zinc finger protein 414                            |
| Zfyve9        | zinc finger, FYVE domain containing 9              |



**Table S20. G protein signaling theoretical dataset.** The G protein signaling dataset represents the intersection between the cellular signaling and G protein theoretical datasets.

| Gene Symbol   | Gene Definition                                                                           |
|---------------|-------------------------------------------------------------------------------------------|
| LOC139796     | LOC139796                                                                                 |
| 0610007p14rik | RIKEN cDNA 0610007P14 gene                                                                |
| 0610031j06rik | RIKEN cDNA 0610031J06 gene                                                                |
| 1600002k03rik | RIKEN cDNA 1600002K03 gene                                                                |
| 1700009n14rik | RIKEN cDNA 1700009N14 gene                                                                |
| 1700057k13rik | RIKEN cDNA 1700057K13 gene                                                                |
| 1810014f10rik | RIKEN cDNA 1810014F10 gene                                                                |
| 2310001a20rik | RIKEN cDNA 2310001A20 gene                                                                |
| 2410018m08rik | RIKEN cDNA 2410018M08 gene                                                                |
| 2500003m10rik | RIKEN cDNA 2500003M10 gene                                                                |
| 2700078k21rik | RIKEN cDNA 2700078K21 gene                                                                |
| 4833424o15rik | RIKEN cDNA 4833424O15 gene                                                                |
| 4930420k17rik | RIKEN cDNA 4930420K17 gene                                                                |
| 4930455c21rik | RIKEN cDNA 4930455C21 gene                                                                |
| 4933424b01rik | RIKEN cDNA 4933424B01 gene                                                                |
| 4933436h12rik | RIKEN cDNA 4933436H12 gene                                                                |
| 6430548m08rik | RIKEN cDNA 6430548M08 gene                                                                |
| 9430023l20rik | RIKEN cDNA 9430023L20 gene                                                                |
| A130040m12rik | RIKEN cDNA A130040M12 gene                                                                |
| Abcb6         | ATP-binding cassette, sub-family B (MDR/TAP), member 6                                    |
| Actr8         | ARP8 actin-related protein 8 homolog ( <i>S. cerevisiae</i> )                             |
| Adcy2         | adenylate cyclase 2                                                                       |
| Adcy4         | adenylate cyclase 4                                                                       |
| Adcy5         | adenylate cyclase 5; similar to adenylate cyclase 5                                       |
| Adnp2         | ADNP homeobox 2                                                                           |
| Aig1          | androgen-induced 1                                                                        |
| Ak3l1         | predicted gene 13639; similar to adenylate kinase 4; adenylate kinase 3-like 1            |
| Ak5           | adenylate kinase 5                                                                        |
| Akap13        | A kinase (PRKA) anchor protein 13                                                         |
| Akr1e1        | aldo-keto reductase family 1, member E1                                                   |
| Als2cr2       | amyotrophic lateral sclerosis 2 (juvenile) chromosome region, candidate 2 homolog (human) |
| Ankrd7        | ankyrin repeat domain 7                                                                   |
| Ard1b         | N(alpha)-acetyltransferase 11, NatA catalytic subunit                                     |
| Arhgap1       | Rho GTPase activating protein 1; predicted gene 8514                                      |
| Arhgap10      | Rho GTPase activating protein 10                                                          |
| Arhgap21      | Rho GTPase activating protein 21                                                          |
| Arhgap22      | Rho GTPase activating protein 22                                                          |
| Arhgap26      | RIKEN cDNA 9630014M24 gene; Rho GTPase activating protein 26; predicted gene 5820         |
| Arhgap29      | Rho GTPase activating protein 29                                                          |
| Arhgap36      | Rho GTPase activating protein 36                                                          |
| Arhgap4       | Rho GTPase activating protein 4                                                           |

|               |                                                                                                                                              |
|---------------|----------------------------------------------------------------------------------------------------------------------------------------------|
| Arhgap5       | Rho GTPase activating protein 5                                                                                                              |
| Arhgap8       | Rho GTPase activating protein 8                                                                                                              |
| Arhgef1       | Rho guanine nucleotide exchange factor (GEF) 1                                                                                               |
| Arhgef11      | Rho guanine nucleotide exchange factor (GEF) 11                                                                                              |
| Arhgef12      | predicted gene 7281; predicted gene 5831; similar to SP140 nuclear body protein (predicted); Rho guanine nucleotide exchange factor (GEF) 12 |
| Arhgef15      | Rho guanine nucleotide exchange factor (GEF) 15                                                                                              |
| Arhgef17      | Rho guanine nucleotide exchange factor (GEF) 17                                                                                              |
| Arhgef2       | rho/rac guanine nucleotide exchange factor (GEF) 2                                                                                           |
| Arhgef4       | Rho guanine nucleotide exchange factor (GEF) 4                                                                                               |
| Arhgef6       | Rac/Cdc42 guanine nucleotide exchange factor (GEF) 6                                                                                         |
| Arid3c        | AT rich interactive domain 3C (BRIGHT-like)                                                                                                  |
| Arl6ip1       | ADP-ribosylation factor-like 6 interacting protein 1                                                                                         |
| Arl6ip4       | ADP-ribosylation factor-like 6 interacting protein 4; similar to SRp25 nuclear protein                                                       |
| Arl8b         | ADP-ribosylation factor-like 8B                                                                                                              |
| Ars2          | serrate RNA effector molecule homolog (Arabidopsis)                                                                                          |
| Arsj          | arylsulfatase J                                                                                                                              |
| Arsk          | similar to arylsulfatase K; arylsulfatase K                                                                                                  |
| Astl          | similar to Astacin-like metalloendopeptidase precursor (Oocyte astacin) (Ovastacin); astacin-like metalloendopeptidase (M12 family)          |
| Asxl3         | additional sex combs like 3 (Drosophila)                                                                                                     |
| Atad3a        | ATPase family, AAA domain containing 3A                                                                                                      |
| Atp13a3       | ATPase type 13A3                                                                                                                             |
| Atp5f1        | ATP synthase, H <sup>+</sup> transporting, mitochondrial F0 complex, subunit b, isoform 1; predicted gene 12231                              |
| Atp5k         | predicted gene 2972; ATP synthase, H <sup>+</sup> transporting, mitochondrial F1F0 complex, subunit e                                        |
| Atpaf1        | ATP synthase mitochondrial F1 complex assembly factor 1                                                                                      |
| Aup1          | ancient ubiquitous protein 1                                                                                                                 |
| Aw125753      | Fam84a family with sequence similarity 84, member A                                                                                          |
| Axud1         | cysteine-serine-rich nuclear protein 1                                                                                                       |
| B020018g12rik | RNA binding motif protein 8a; RIKEN cDNA B020018G12 gene                                                                                     |
| B230208h17rik | RIKEN cDNA B230208H17 gene                                                                                                                   |
| Bc010304      | Fam120a family with sequence similarity 120, member A                                                                                        |
| Bc017158      | cDNA sequence BC017158                                                                                                                       |
| Bc021395      | Bc021395                                                                                                                                     |
| Bc028663      | Bc028663                                                                                                                                     |
| Bc029169      | Bc029169                                                                                                                                     |
| Bcar3         | breast cancer anti-estrogen resistance 3                                                                                                     |
| Bcas2         | breast carcinoma amplified sequence 2                                                                                                        |
| Bin3          | bridging integrator 3                                                                                                                        |
| Bnip2         | BCL2/adenovirus E1B interacting protein 2                                                                                                    |
| Bnipl         | BCL2/adenovirus E1B 19kD interacting protein like                                                                                            |
| Brd1          | bromodomain containing 1; similar to bromodomain containing 1                                                                                |
| Bri3bp        | Bri3 binding protein                                                                                                                         |
| Bspry         | B-box and SPRY domain containing                                                                                                             |
| Cab39         | calcium binding protein 39                                                                                                                   |
| Camk1g        | calcium/calmodulin-dependent protein kinase I gamma                                                                                          |
| Card6         | caspase recruitment domain family, member 6                                                                                                  |
| Ccdc88a       | coiled coil domain containing 88A                                                                                                            |
| Ccdc88b       | coiled-coil domain containing 88B                                                                                                            |

|           |                                                                                     |
|-----------|-------------------------------------------------------------------------------------|
| Ccp1      | cell cycle progression 1                                                            |
| Ccpn-ps   | calcyphosine, pseudogene                                                            |
| Cd247     | CD247 antigen                                                                       |
| Cd3g      | CD3 antigen, gamma polypeptide                                                      |
| Cdc42bpb  | CDC42 binding protein kinase beta                                                   |
| Cdc42ep2  | CDC42 effector protein (Rho GTPase binding) 2                                       |
| Cdc42ep5  | CDC42 effector protein (Rho GTPase binding) 5                                       |
| Cdc42se1  | CDC42 small effector 1                                                              |
| Cdgap     | Rho GTPase activating protein 31                                                    |
| Cenpw     | centromere protein W                                                                |
| Centa1    | ArfGAP with dual PH domains 1                                                       |
| Centd2    | ArfGAP with RhoGAP domain, ankyrin repeat and PH domain 1                           |
| Centd3    | ArfGAP with RhoGAP domain, ankyrin repeat and PH domain 3                           |
| Centg1    | ArfGAP with GTPase domain, ankyrin repeat and PH domain 2                           |
| Centg2    | ArfGAP with GTPase domain, ankyrin repeat and PH domain 1                           |
| Centg3    | ArfGAP with GTPase domain, ankyrin repeat and PH domain 3                           |
| Cep57     | centrosomal protein 57                                                              |
| Chn1      | chimerin (chimaerin) 1                                                              |
| Chn2      | chimerin (chimaerin) 2                                                              |
| Chpst     | chondroprogenitor specific transcript                                               |
| Cirbp-rs1 | cold inducible RNA binding protein, related sequence 1                              |
| Cirbp-rs3 | cold inducible RNA binding protein, related sequence 3                              |
| Clec4b1   | C-type lectin domain family 4, member b1                                            |
| Clybl     | citrate lyase beta like                                                             |
| Cml1      | N-acetyltransferase 8B; camello-like 1                                              |
| Cml2      | camello-like 2                                                                      |
| Cml3      | predicted gene 4477; camello-like 3                                                 |
| Cml5      | camello-like 5                                                                      |
| Cnbp12    | cellular nucleic acid binding protein-like 2                                        |
| Cnih      | cornichon homolog (Drosophila)                                                      |
| Cnksr1    | connector enhancer of kinase suppressor of Ras 1                                    |
| Cnm1      | cyclin M1                                                                           |
| Cnm2      | cyclin M2                                                                           |
| Cnm3      | cyclin M3                                                                           |
| Cnot1     | predicted gene 6158; CCR4-NOT transcription complex, subunit 1                      |
| Cnot8     | CCR4-NOT transcription complex, subunit 8                                           |
| Cops4     | COP9 (constitutive photomorphogenic) homolog, subunit 4 (Arabidopsis thaliana)      |
| Coq4      | coenzyme Q4 homolog (yeast)                                                         |
| Coro2a    | coronin, actin binding protein 2A                                                   |
| Cpne3     | copine III                                                                          |
| Creg2     | cellular repressor of E1A-stimulated genes 2                                        |
| Cryz11    | crystallin, zeta (quinone reductase)-like 1                                         |
| Csf2ra    | colony stimulating factor 2 receptor, alpha, low-affinity (granulocyte-macrophage)  |
| Csf2rb2   | colony stimulating factor 2 receptor, beta 2, low-affinity (granulocyte-macrophage) |
| Csmd2     | CUB and Sushi multiple domains 2                                                    |
| Csnk1g1   | casein kinase 1, gamma 1                                                            |
| Csnk1g2   | casein kinase 1, gamma 2                                                            |
| Csnk1g3   | casein kinase 1, gamma 3; similar to casein kinase 1, gamma 3                       |

|               |                                                                |
|---------------|----------------------------------------------------------------|
| Csrnp2        | cysteine-serine-rich nuclear protein 2                         |
| Csrnp3        | cysteine-serine-rich nuclear protein 3                         |
| Ctf2          | cardiotrophin 2                                                |
| Ctps2         | cytidine 5'-triphosphate synthase 2                            |
| Cutc          | cutC copper transporter homolog (E.coli)                       |
| D10ertd610e   | DNA segment, Chr 10, ERATO Doi 610, expressed                  |
| D11mit109     | DNA segment, Chr 11, Massachusetts Institute of Technology 109 |
| D11mit205     | DNA segment, Chr 11, Massachusetts Institute of Technology 205 |
| D13mit91      | DNA segment, Chr 13, Massachusetts Institute of Technology 91  |
| D14mit116     | DNA segment, Chr 14, Massachusetts Institute of Technology 116 |
| D14mit173     | DNA segment, Chr 14, Massachusetts Institute of Technology 173 |
| D14mit56      | DNA segment, Chr 14, Massachusetts Institute of Technology 56  |
| D15mit198     | DNA segment, Chr 15, Massachusetts Institute of Technology 198 |
| D17mit7       | DNA segment, Chr 17, Massachusetts Institute of Technology 7   |
| D19mit24      | DNA segment, Chr 19, Massachusetts Institute of Technology 24  |
| D19mit66      | DNA segment, Chr 19, Massachusetts Institute of Technology 66  |
| D19mit75      | DNA segment, Chr 19, Massachusetts Institute of Technology 75  |
| D330017j20rik | Fam40b family with sequence similarity 40, member B            |
| D5mit317      | DNA segment, Chr 5, Massachusetts Institute of Technology 317  |
| D6mit252      | DNA segment, Chr 6, Massachusetts Institute of Technology 252  |
| D8ertd82e     | DNA segment, Chr 8, ERATO Doi 82, expressed                    |
| D930005d10rik | Radil Ras association and DIL domains                          |
| D9mit60       | DNA segment, Chr 9, Massachusetts Institute of Technology 60   |
| D9mit61       | DNA segment, Chr 9, Massachusetts Institute of Technology 61   |
| Dak           | dihydroxyacetone kinase 2 homolog (yeast)                      |
| Dchs2         | dachsous 2 (Drosophila)                                        |
| Ddx41         | DEAD (Asp-Glu-Ala-Asp) box polypeptide 41                      |
| Ddx47         | DEAD (Asp-Glu-Ala-Asp) box polypeptide 47                      |
| Ddx54         | DEAD (Asp-Glu-Ala-Asp) box polypeptide 54                      |
| Ddx55         | DEAD (Asp-Glu-Ala-Asp) box polypeptide 55                      |
| Def6          | differentially expressed in FDCP 6                             |
| Def8          | differentially expressed in FDCP 8                             |
| Defb29        | defensin beta 29                                               |
| Dennd4c       | DENN/MADD domain containing 4C                                 |
| Depdc2        | DEP domain containing 2                                        |
| Dgkb          | diacylglycerol kinase, beta                                    |
| Dgkd          | diacylglycerol kinase, delta                                   |
| Dgkg          | diacylglycerol kinase, gamma                                   |
| Dgkq          | diacylglycerol kinase, theta                                   |
| Dhdds         | dehydrololichyl diphosphate synthase                           |
| Dhx35         | predicted gene 4713; DEAH (Asp-Glu-Ala-His) box polypeptide 35 |
| Diras1        | DIRAS family, GTP-binding RAS-like 1                           |
| Diras2        | DIRAS family, GTP-binding RAS-like 2                           |
| Dock1         | dedicator of cytokinesis 1                                     |
| Dock10        | dedicator of cytokinesis 10                                    |
| Dock2         | dedicator of cyto-kinesis 2                                    |
| Dock4         | dedicator of cytokinesis 4                                     |
| Dock9         | dedicator of cytokinesis 9                                     |

|                    |                                                                                                    |
|--------------------|----------------------------------------------------------------------------------------------------|
| Dolpp1             | dolichyl pyrophosphate phosphatase 1                                                               |
| Dpf2               | D4, zinc and double PHD fingers family 2                                                           |
| Dph2               | DPH2 homolog ( <i>S. cerevisiae</i> )                                                              |
| Dph3               | DPH3 homolog (KT111, <i>S. cerevisiae</i> )                                                        |
| Dqx1               | DEAQ RNA-dependent ATPase                                                                          |
| Dtd1               | similar to D-tyrosyl-tRNA deacylase 1; D-tyrosyl-tRNA deacylase 1 homolog ( <i>S. cerevisiae</i> ) |
| Dub2               | ubiquitin specific peptidase 17-like 5                                                             |
| Dub3               | predicted gene 6596                                                                                |
| Dub4               | deubiquitinating enzyme 4                                                                          |
| Dullard            | similar to Dullard homolog ( <i>Xenopus laevis</i> ); Dullard homolog ( <i>Xenopus laevis</i> )    |
| E130112I23rik      | RIKEN cDNA E130112L23 gene                                                                         |
| Efhd1              | EF hand domain containing 1                                                                        |
| Egfl8              | EGF-like domain 8                                                                                  |
| Eif3i              | eukaryotic translation initiation factor 3, subunit I                                              |
| Elmo1              | engulfment and cell motility 1, ced-12 homolog ( <i>C. elegans</i> )                               |
| Elmo2              | engulfment and cell motility 2, ced-12 homolog ( <i>C. elegans</i> )                               |
| Emilin3            | elastin microfibril interfacier 3                                                                  |
| Eml3               | echinoderm microtubule associated protein like 3                                                   |
| Ensmusg00000053178 | Gm9897 predicted gene 9897                                                                         |
| Ensmusg00000067748 | Rpl17-ps5 ribosomal protein L17, pseudogene 5                                                      |
| Epb4.1I4a          | erythrocyte protein band 4.1-like 4a                                                               |
| Epb4.1I4b          | erythrocyte protein band 4.1-like 4b                                                               |
| Eps8               | epidermal growth factor receptor pathway substrate 8                                               |
| Eps8I1             | EPS8-like 1                                                                                        |
| Eps8I2             | EPS8-like 2                                                                                        |
| Eps8I3             | EPS8-like 3                                                                                        |
| Eral1              | Era (G-protein)-like 1 ( <i>E. coli</i> )                                                          |
| Erd1               | erythroid differentiation regulator 1                                                              |
| Etaa1              | Ewing's tumor-associated antigen 1                                                                 |
| Etv2               | similar to ETS related protein 71; ets variant gene 2                                              |
| Exoc2              | exocyst complex component 2                                                                        |
| Exosc8             | exosome component 8                                                                                |
| F830045p16rik      | RIKEN cDNA F830045P16 gene                                                                         |
| Fam177a            | Fam177a family with sequence similarity 177, member A                                              |
| Fam40a             | family with sequence similarity 40, member A                                                       |
| Fam57a             | Fam57a family with sequence similarity 57, member A                                                |
| Fam92a             | family with sequence similarity 92, member A                                                       |
| Farp2              | FERM, RhoGEF and pleckstrin domain protein 2                                                       |
| Fbxo10             | F-box protein 10                                                                                   |
| Ficd               | FIC domain containing                                                                              |
| Fitm1              | fat storage-inducing transmembrane protein 1                                                       |
| Fndc1              | fibronectin type III domain containing 1; similar to fibronectin type III domain containing 1      |
| Fndc4              | fibronectin type III domain containing 4                                                           |
| Fndc5              | fibronectin type III domain containing 5                                                           |
| Fpgt               | fucose-1-phosphate guanylyltransferase                                                             |
| Frag1              | post-GPI attachment to proteins 2                                                                  |
| Frmd4b             | FERM domain containing 4B                                                                          |
| Ftsj2              | FtsJ homolog 2 ( <i>E. coli</i> )                                                                  |

|         |                                                                                                                           |
|---------|---------------------------------------------------------------------------------------------------------------------------|
| Fuk     | fucokinase                                                                                                                |
| Gas2l1  | growth arrest-specific 2 like 1                                                                                           |
| Gas2l2  | growth arrest-specific 2 like 2                                                                                           |
| Gas4    | growth arrest specific 4                                                                                                  |
| Gde1    | glycerophosphodiester phosphodiesterase 1                                                                                 |
| Gdpd1   | glycerophosphodiester phosphodiesterase domain containing 1                                                               |
| Gdpd4   | glycerophosphodiester phosphodiesterase domain containing 4                                                               |
| Gem     | GTP binding protein (gene overexpressed in skeletal muscle)                                                               |
| Get4    | golgi to ER traffic protein 4 homolog ( <i>S. cerevisiae</i> )                                                            |
| Gfm1    | G elongation factor, mitochondrial 1                                                                                      |
| Ggps1   | geranylgeranyl diphosphate synthase 1; similar to Ggps1 protein; predicted gene 5630                                      |
| Ggt7    | gamma-glutamyltransferase 7                                                                                               |
| Gimap1  | GTPase, IMAP family member 1                                                                                              |
| Gimap6  | GTPase, IMAP family member 6                                                                                              |
| Gimap7  | GTPase, IMAP family member 7                                                                                              |
| Gimap8  | GTPase, IMAP family member 8                                                                                              |
| Gimap9  | GTPase, IMAP family member 9                                                                                              |
| Gipc2   | GIPC PDZ domain containing family, member 2                                                                               |
| Gipc3   | GIPC PDZ domain containing family, member 3                                                                               |
| Glpr2   | GLI pathogenesis-related 2                                                                                                |
| Glod4   | glyoxalase domain containing 4                                                                                            |
| Gm11818 | Gm11818 predicted gene 11818                                                                                              |
| Gm13290 | Gm13290 predicted gene 13290                                                                                              |
| Gm13458 | Gm13458 predicted gene 13458                                                                                              |
| Gm15352 | Gm15352 predicted gene 15352                                                                                              |
| Gm347   | predicted gene 347                                                                                                        |
| Gm7325  | Gm7325 predicted gene 7325                                                                                                |
| Gm885   | predicted gene 885                                                                                                        |
| Gmpr    | guanosine monophosphate reductase                                                                                         |
| Gna11   | guanine nucleotide binding protein, alpha 11                                                                              |
| Gna12   | guanine nucleotide binding protein, alpha 12; similar to Guanine nucleotide-binding protein alpha-12 subunit (G alpha-12) |
| Gna13   | guanine nucleotide binding protein, alpha 13                                                                              |
| Gna14   | guanine nucleotide binding protein, alpha 14                                                                              |
| Gna15   | guanine nucleotide binding protein, alpha 15                                                                              |
| Gnai1   | guanine nucleotide binding protein (G protein), alpha inhibiting 1                                                        |
| Gnai3   | guanine nucleotide binding protein (G protein), alpha inhibiting 3                                                        |
| Gnal    | guanine nucleotide binding protein, alpha stimulating, olfactory type                                                     |
| Gnao1   | guanine nucleotide binding protein, alpha O                                                                               |
| Gnaz    | guanine nucleotide binding protein, alpha z subunit                                                                       |
| Gnb1    | guanine nucleotide binding protein (G protein), beta 1                                                                    |
| Gnb2    | guanine nucleotide binding protein (G protein), beta 2                                                                    |
| Gnb2l1  | guanine nucleotide binding protein (G protein), beta polypeptide 2 like 1                                                 |
| Gnb4    | guanine nucleotide binding protein (G protein), beta 4                                                                    |
| Gnb5    | guanine nucleotide binding protein (G protein), beta 5                                                                    |
| Gng11   | guanine nucleotide binding protein (G protein), gamma 11                                                                  |
| Gng12   | guanine nucleotide binding protein (G protein), gamma 12                                                                  |
| Gng13   | guanine nucleotide binding protein (G protein), gamma 13                                                                  |
| Gng2    | guanine nucleotide binding protein (G protein), gamma 2                                                                   |

|           |                                                                                                                                  |
|-----------|----------------------------------------------------------------------------------------------------------------------------------|
| Gng3      | guanine nucleotide binding protein (G protein), gamma 3                                                                          |
| Gng4      | guanine nucleotide binding protein (G protein), gamma 4                                                                          |
| Gng7      | guanine nucleotide binding protein (G protein), gamma 7                                                                          |
| Gngt1     | guanine nucleotide binding protein (G protein), gamma transducing activity polypeptide 1                                         |
| Gngt2     | guanine nucleotide binding protein (G protein), gamma transducing activity polypeptide 2                                         |
| Got11     | glutamic-oxaloacetic transaminase 1-like 1                                                                                       |
| Gpr107    | G protein-coupled receptor 107; hypothetical protein LOC100047589                                                                |
| Gpr108    | G protein-coupled receptor 108                                                                                                   |
| Gpr111    | G protein-coupled receptor 111                                                                                                   |
| Gpr113    | G protein-coupled receptor 113                                                                                                   |
| Gpr128    | G protein-coupled receptor 128                                                                                                   |
| Gpr142    | G protein-coupled receptor 142                                                                                                   |
| Gpr156    | G protein-coupled receptor 156                                                                                                   |
| Gpr176    | G protein-coupled receptor 176                                                                                                   |
| Gpr177    | G protein-coupled receptor 177                                                                                                   |
| Gpr20     | G protein-coupled receptor 20                                                                                                    |
| Gpr3      | G-protein coupled receptor 3                                                                                                     |
| Gpr6      | G protein-coupled receptor 6                                                                                                     |
| Gprin1    | G protein-regulated inducer of neurite outgrowth 1                                                                               |
| Gprin2    | G protein regulated inducer of neurite outgrowth 2                                                                               |
| Gpsm1     | G-protein signalling modulator 1 (AGS3-like, C. elegans)                                                                         |
| Gpsm3     | G-protein signalling modulator 3 (AGS3-like, C. elegans)                                                                         |
| Grasp     | GRP1 (general receptor for phosphoinositides 1)-associated scaffold protein                                                      |
| Grit      | Rho GTPase activating protein 32                                                                                                 |
| Grif1     | glucocorticoid receptor DNA binding factor 1                                                                                     |
| Grtp1     | GH regulated TBC protein 1                                                                                                       |
| Grwd1     | glutamate-rich WD repeat containing 1                                                                                            |
| Gsdma1    | gasdermin A                                                                                                                      |
| Gtpbp1    | GTP binding protein 1                                                                                                            |
| Gtpbp10   | GTP-binding protein 10 (putative); predicted gene 6877                                                                           |
| Gtpbp2    | GTP binding protein 2                                                                                                            |
| Gtpbp3    | GTP binding protein 3                                                                                                            |
| Gtpbp5    | GTP binding protein 5                                                                                                            |
| Hdgfl1    | hepatoma derived growth factor-like 1                                                                                            |
| Helz      | helicase with zinc finger domain                                                                                                 |
| Hhat      | hedgehog acyltransferase                                                                                                         |
| Higd1a    | HIG1 domain family, member 1A                                                                                                    |
| Hrasls    | HRAS-like suppressor                                                                                                             |
| Hsd1      | hydroxysteroid dehydrogenase like 1                                                                                              |
| Hsd12     | hydroxysteroid dehydrogenase like 2                                                                                              |
| Hspa9-ps1 | heat shock protein 9, pseudogene 1                                                                                               |
| Htr1e     | 5-hydroxytryptamine (serotonin) receptor 1E                                                                                      |
| Iapls3-28 | intracisternal A particle, lymphocyte specific 3-28                                                                              |
| Icmt      | isoprenylcysteine carboxyl methyltransferase                                                                                     |
| Ier3ip1   | immediate early response 3 interacting protein 1; haloacid dehalogenase-like hydrolase domain containing 2; predicted gene 10784 |
| If3       | Sendai virus induced interferon 3                                                                                                |
| Ifnar2    | interferon (alpha and beta) receptor 2                                                                                           |
| Ifnz      | interferon zeta                                                                                                                  |

|           |                                                                                                                    |
|-----------|--------------------------------------------------------------------------------------------------------------------|
| Igsf11    | immunoglobulin superfamily, member 11                                                                              |
| Il22ra2   | interleukin 22 receptor, alpha 2                                                                                   |
| Il2rb     | interleukin 2 receptor, beta chain                                                                                 |
| Il3ra     | interleukin 3 receptor, alpha chain                                                                                |
| Il9r      | similar to interleukin 9 receptor; interleukin 9 receptor                                                          |
| Inpp4b    | inositol polyphosphate-4-phosphatase, type II                                                                      |
| Ints4     | integrator complex subunit 4                                                                                       |
| Ipo11     | importin 11                                                                                                        |
| Iqgap2    | IQ motif containing GTPase activating protein 2                                                                    |
| Iqgap3    | IQ motif containing GTPase activating protein 3                                                                    |
| Irf9      | interferon regulatory factor 9                                                                                     |
| Itgb1bp1  | integrin beta 1 binding protein 1                                                                                  |
| Itgb1bp2  | integrin beta 1 binding protein 2                                                                                  |
| Itgb1bp3  | integrin beta 1 binding protein 3                                                                                  |
| Itgb3bp   | predicted gene 3507; integrin beta 3 binding protein (beta3-endonexin); similar to integrin beta 3 binding protein |
| Itm2c     | integral membrane protein 2C                                                                                       |
| Kank1     | KN motif and ankyrin repeat domains 1                                                                              |
| Kank2     | KN motif and ankyrin repeat domains 2                                                                              |
| Kank3     | KN motif and ankyrin repeat domains 3                                                                              |
| Kank4     | KN motif and ankyrin repeat domains 4                                                                              |
| Kbtbd7    | kelch repeat and BTB (POZ) domain containing 7                                                                     |
| Kcmf1     | potassium channel modulatory factor 1                                                                              |
| Kdelr1    | KDEL (Lys-Asp-Glu-Leu) endoplasmic reticulum protein retention receptor 1                                          |
| Kif13b    | kinesin family member 13B                                                                                          |
| Klhdc1    | kelch domain containing 1                                                                                          |
| Klhdc2    | kelch domain containing 2                                                                                          |
| Klhl31    | Klhl3 kelch-like 3 (Drosophila)                                                                                    |
| Klhl31    | kelch-like 31 (Drosophila)                                                                                         |
| Kndc1     | kinase non-catalytic C-lobe domain (KIND) containing 1                                                             |
| Ktelc1    | KTEL (Lys-Tyr-Glu-Leu) containing 1                                                                                |
| Lancl1    | LanC (bacterial lantibiotic synthetase component C)-like 1                                                         |
| Lancl2    | LanC (bacterial lantibiotic synthetase component C)-like 2                                                         |
| Li        | lined                                                                                                              |
| Loc436194 | Gm5754 predicted gene 5754                                                                                         |
| Lphn1     | latrophilin 1                                                                                                      |
| Lrig2     | leucine-rich repeats and immunoglobulin-like domains 2                                                             |
| Lrrc26    | leucine rich repeat containing 26                                                                                  |
| Lrrc8a    | leucine rich repeat containing 8A                                                                                  |
| Lrrc8b    | leucine rich repeat containing 8 family, member B                                                                  |
| Lrrc8c    | leucine rich repeat containing 8 family, member C                                                                  |
| Lrrc8d    | leucine rich repeat containing 8D                                                                                  |
| Lrrc8e    | similar to Leucine rich repeat containing 8 family, member E; leucine rich repeat containing 8 family, member E    |
| Ly6h      | similar to Lymphocyte antigen 6H precursor (Ly-6H); lymphocyte antigen 6 complex, locus H                          |
| Mageb2    | melanoma antigen, family B, 1; melanoma antigen, family B, 2                                                       |
| Mapk13    | mitogen-activated protein kinase 13                                                                                |
| Mat2a     | methionine adenosyltransferase II, alpha                                                                           |
| Mat2b     | methionine adenosyltransferase II, beta                                                                            |
| Mcf2l     | mcf.2 transforming sequence-like                                                                                   |



|           |                                                                                                                 |
|-----------|-----------------------------------------------------------------------------------------------------------------|
| Med29     | mediator complex subunit 29; predicted gene 9450                                                                |
| Med6      | mediator of RNA polymerase II transcription, subunit 6 homolog (yeast)                                          |
| Megf11    | multiple EGF-like-domains 11                                                                                    |
| Mett11d1  | methyltransferase 11 domain containing 1                                                                        |
| Mettl3    | methyltransferase like 3                                                                                        |
| Mical1    | microtubule associated monoxygenase, calponin and LIM domain containing 1                                       |
| Micalcl   | MICAL C-terminal like                                                                                           |
| Midn      | midnolin                                                                                                        |
| Mmd       | monocyte to macrophage differentiation-associated; similar to monocyte to macrophage differentiation-associated |
| Mon1b     | MON1 homolog b (yeast)                                                                                          |
| Mprip     | myosin phosphatase Rho interacting protein; predicted gene 8086                                                 |
| Mras      | muscle and microspikes RAS                                                                                      |
| Mrpl12    | mitochondrial ribosomal protein L12                                                                             |
| Mrpl15    | mitochondrial ribosomal protein L15                                                                             |
| Mrpl2     | mitochondrial ribosomal protein L2                                                                              |
| Mrpl3     | mitochondrial ribosomal protein L3                                                                              |
| Mrpl46    | mitochondrial ribosomal protein L46                                                                             |
| Mrps25    | mitochondrial ribosomal protein S25                                                                             |
| Mrps35    | mitochondrial ribosomal protein S35                                                                             |
| Mrrf      | mitochondrial ribosome recycling factor                                                                         |
| Ms4a3     | membrane-spanning 4-domains, subfamily A, member 3                                                              |
| Ms4a5     | membrane-spanning 4-domains, subfamily A, member 5                                                              |
| Ms4a7     | membrane-spanning 4-domains, subfamily A, member 7                                                              |
| Msto1     | misato homolog 1 (Drosophila)                                                                                   |
| Mterfd3   | MTERF domain containing 3                                                                                       |
| Mtx2      | metaxin 2                                                                                                       |
| Mudeng    | MU-2/AP1M2 domain containing, death-inducing                                                                    |
| Mycbpap   | MYCBP associated protein                                                                                        |
| Myg1      | melanocyte proliferating gene 1                                                                                 |
| N6amt1    | N-6 adenine-specific DNA methyltransferase 1 (putative)                                                         |
| Naif1     | nuclear apoptosis inducing factor 1                                                                             |
| Narg2     | NMDA receptor-regulated gene 2                                                                                  |
| Nckap1    | NCK-associated protein 1                                                                                        |
| Nek3      | NIMA (never in mitosis gene a)-related expressed kinase 3                                                       |
| Net1      | predicted gene 8990; neuroepithelial cell transforming gene 1                                                   |
| Ngef      | neuronal guanine nucleotide exchange factor                                                                     |
| Ngrn      | neugrin, neurite outgrowth associated                                                                           |
| Nicn1     | nicolin 1                                                                                                       |
| Nip7      | nuclear import 7 homolog (S. cerevisiae)                                                                        |
| Nipsnap3a | nipsnap homolog 3A (C. elegans)                                                                                 |
| Nisch     | nischarin                                                                                                       |
| Nkg7      | natural killer cell group 7 sequence                                                                            |
| Nlrp12    | NLR family, pyrin domain containing 12                                                                          |
| Nlrp4e    | NLR family, pyrin domain containing 4E                                                                          |
| Nme2      | non-metastatic cells 2, protein (NM23B)                                                                         |
| Nme6      | similar to Nme6 protein; non-metastatic cells 6, protein expressed in (nucleoside-diphosphate kinase)           |
| Nme7      | non-metastatic cells 7, protein expressed in (nucleoside-diphosphate kinase)                                    |
| Nob1      | NIN1/RPN12 binding protein 1 homolog (S. cerevisiae)                                                            |

|         |                                                                                                                           |
|---------|---------------------------------------------------------------------------------------------------------------------------|
| Nol8    | nucleolar protein 8                                                                                                       |
| Npdc1   | neural proliferation, differentiation and control gene 1                                                                  |
| Nrbp1   | nuclear receptor binding protein 1                                                                                        |
| Nudt5   | nudix (nucleoside diphosphate linked moiety X)-type motif 5                                                               |
| Nxph2   | neurexophilin 2                                                                                                           |
| Odc-rs9 | ornithine decarboxylase, related sequence 9                                                                               |
| Ola1    | Obg-like ATPase 1                                                                                                         |
| Olfml1  | olfactomedin-like 1                                                                                                       |
| Olfml3  | olfactomedin-like 3                                                                                                       |
| Olf1310 | olfactory receptor 1310                                                                                                   |
| Olf1342 | olfactory receptor 1342                                                                                                   |
| Olf171  | olfactory receptor 71                                                                                                     |
| Olf1937 | olfactory receptor 937                                                                                                    |
| Olf1985 | olfactory receptor 985                                                                                                    |
| Oosp1   | oocyte secreted protein 1                                                                                                 |
| Osbpl6  | oxysterol binding protein-like 6                                                                                          |
| Osbpl7  | oxysterol binding protein-like 7                                                                                          |
| Pak1ip1 | PAK1 interacting protein 1                                                                                                |
| Pak4    | p21 protein (Cdc42/Rac)-activated kinase 4                                                                                |
| Pak6    | p21 protein (Cdc42/Rac)-activated kinase 6                                                                                |
| Pank1   | pantothenate kinase 1                                                                                                     |
| Paqr5   | progesterin and adipoQ receptor family member V                                                                           |
| Paqr6   | progesterin and adipoQ receptor family member VI; predicted gene 6821                                                     |
| Paqr7   | progesterin and adipoQ receptor family member VII                                                                         |
| Paqr8   | progesterin and adipoQ receptor family member VIII                                                                        |
| Paqr9   | progesterin and adipoQ receptor family member IX                                                                          |
| Pat1    | protein associated with topoisomerase II homolog 1 (yeast)                                                                |
| Pat2    | protein associated with topoisomerase II homolog 2 (yeast)                                                                |
| Pcdhga1 | protocadherin gamma subfamily A, 1                                                                                        |
| Pdc     | phosducin                                                                                                                 |
| Pdcl    | phosducin-like                                                                                                            |
| Pdcl3   | phosducin-like 3                                                                                                          |
| Pde6g   | phosphodiesterase 6G, cGMP-specific, rod, gamma                                                                           |
| Pde6h   | phosphodiesterase 6H, cGMP-specific, cone, gamma                                                                          |
| Pdik1l  | PDLIM1 interacting kinase 1 like                                                                                          |
| Pdzd4   | PDZ domain containing 4                                                                                                   |
| Pet2    | plasmacytoma expressed transcript 2                                                                                       |
| Pgls    | 6-phosphogluconolactonase                                                                                                 |
| Pigy    | phosphatidylinositol glycan anchor biosynthesis, class Y                                                                  |
| Pigy1   | phosphatidylinositol glycan anchor biosynthesis, class Y-like                                                             |
| Pik3cb  | phosphatidylinositol 3-kinase, catalytic, beta polypeptide                                                                |
| Pik3r3  | phosphatidylinositol 3 kinase, regulatory subunit, polypeptide 3 (p55)                                                    |
| Pik3r5  | phosphoinositide-3-kinase, regulatory subunit 5, p101                                                                     |
| Pik3r6  | phosphoinositide-3-kinase, regulatory subunit 6                                                                           |
| Pip4k2a | phosphatidylinositol-5-phosphate 4-kinase, type II, alpha                                                                 |
| Pip5k1a | phosphatidylinositol-4-phosphate 5-kinase, type 1 alpha                                                                   |
| Pip5k1b | phosphatidylinositol-4-phosphate 5-kinase, type 1 beta; similar to phosphatidylinositol 4-phosphate 5-kinase type I-alpha |
| Pip5k1c | phosphatidylinositol-4-phosphate 5-kinase, type 1 gamma                                                                   |

|          |                                                                                                    |
|----------|----------------------------------------------------------------------------------------------------|
| Pitpna   | phosphatidylinositol transfer protein, alpha                                                       |
| Pitpnb   | phosphatidylinositol transfer protein, beta                                                        |
| Pitpnc1  | phosphatidylinositol transfer protein, cytoplasmic 1                                               |
| Pitpnm1  | phosphatidylinositol transfer protein, membrane-associated 1                                       |
| Pitpnm3  | PITPNM family member 3                                                                             |
| Pkn3     | protein kinase N3                                                                                  |
| Plcb1    | phospholipase C, beta 1                                                                            |
| Plcb2    | phospholipase C, beta 2                                                                            |
| Plcb3    | phospholipase C, beta 3                                                                            |
| Plcd1    | phospholipase C, delta 1                                                                           |
| Plce1    | phospholipase C, epsilon 1                                                                         |
| Plcg2    | phospholipase C, gamma 2                                                                           |
| Plch1    | phospholipase C, eta 1                                                                             |
| Plch2    | phospholipase C, eta 2                                                                             |
| Plcl2    | phospholipase C-like 2                                                                             |
| Plek     | pleckstrin                                                                                         |
| Plek2    | pleckstrin 2                                                                                       |
| Plekha8  | pleckstrin homology domain containing, family A (phosphoinositide binding specific) member 8       |
| Plekhg5  | pleckstrin homology domain containing, family G (with RhoGef domain) member 5                      |
| Plk-ps1  | polo-like kinase, pseudogene 1                                                                     |
| Plxnb1   | plexin B1                                                                                          |
| Plxnb2   | plexin B2                                                                                          |
| Plxnb3   | plexin B3                                                                                          |
| Pno1     | partner of NOB1 homolog ( <i>S. cerevisiae</i> )                                                   |
| Pnpla8   | patatin-like phospholipase domain containing 8                                                     |
| Ppa2     | pyrophosphatase (inorganic) 2                                                                      |
| Ppan     | peter pan homolog ( <i>Drosophila</i> )                                                            |
| Ppap2b   | phosphatidic acid phosphatase type 2B                                                              |
| Ppfibp1  | PTPRF interacting protein, binding protein 1 (liprin beta 1); similar to mKIAA1230 protein         |
| Ppfibp2  | protein tyrosine phosphatase, receptor-type, F interacting protein, binding protein 2              |
| Ppil3    | peptidylprolyl isomerase (cyclophilin)-like 3                                                      |
| Ppm1b    | similar to serine/threonine phosphatase; protein phosphatase 1B, magnesium dependent, beta isoform |
| Ppm1e    | protein phosphatase 1E (PP2C domain containing)                                                    |
| Ppm1f    | protein phosphatase 1F (PP2C domain containing)                                                    |
| Ppp1r16a | protein phosphatase 1, regulatory (inhibitor) subunit 16A                                          |
| Ppp2r2a  | protein phosphatase 2 (formerly 2A), regulatory subunit B (PR 52), alpha isoform                   |
| Ppp2r2c  | protein phosphatase 2 (formerly 2A), regulatory subunit B (PR 52), gamma isoform                   |
| Ppp2r2d  | protein phosphatase 2, regulatory subunit B, delta isoform                                         |
| Ppp2r3a  | protein phosphatase 2 (formerly 2A), regulatory subunit B'', alpha; RIKEN cDNA 3222402P14 gene     |
| Ppp2r4   | protein phosphatase 2A, regulatory subunit B (PR 53)                                               |
| Ppp2r5a  | protein phosphatase 2, regulatory subunit B (B56), alpha isoform                                   |
| Ppp2r5b  | protein phosphatase 2, regulatory subunit B (B56), beta isoform                                    |
| Ppp2r5d  | protein phosphatase 2, regulatory subunit B (B56), delta isoform                                   |
| Ppp2r5e  | protein phosphatase 2, regulatory subunit B (B56), epsilon isoform                                 |
| Pptc7    | PTC7 protein phosphatase homolog ( <i>S. cerevisiae</i> )                                          |
| Prex1    | phosphatidylinositol-3,4,5-trisphosphate-dependent Rac exchange factor 1                           |
| Prkch    | protein kinase C, eta                                                                              |
| Prkd3    | protein kinase D3                                                                                  |

|          |                                                                                                          |
|----------|----------------------------------------------------------------------------------------------------------|
| Psat1    | similar to Phosphoserine aminotransferase 1; phosphoserine aminotransferase 1                            |
| Pscd3    | cytohesin 3                                                                                              |
| Pscdbp   | cytohesin 1 interacting protein                                                                          |
| Psd      | pleckstrin and Sec7 domain containing                                                                    |
| Psd4     | pleckstrin and Sec7 domain containing 4                                                                  |
| Psmg1    | proteasome (prosome, macropain) assembly chaperone 1                                                     |
| Ptcd3    | pentatricopeptide repeat domain 3                                                                        |
| Ptgr2    | prostaglandin reductase 2                                                                                |
| Ptplad1  | protein tyrosine phosphatase-like A domain containing 1                                                  |
| Ptplb    | predicted gene 7908; protein tyrosine phosphatase-like (proline instead of catalytic arginine), member b |
| Ptprb    | protein tyrosine phosphatase, receptor type, B                                                           |
| Pwp1     | PWP1 homolog ( <i>S. cerevisiae</i> )                                                                    |
| Rab37    | RAB37, member of RAS oncogene family                                                                     |
| Rab711   | RAB7, member RAS oncogene family-like 1                                                                  |
| Rabgef1  | similar to Ras negative regulator Rabex-5/Rin2; RAB guanine nucleotide exchange factor (GEF) 1           |
| Rac3     | RAS-related C3 botulinum substrate 3                                                                     |
| Racgap1  | Rac GTPase-activating protein 1; predicted gene 1859                                                     |
| Rala     | v-ral simian leukemia viral oncogene homolog A (ras related)                                             |
| Ralb     | v-ral simian leukemia viral oncogene homolog B (ras related)                                             |
| Ralbp1   | ralA binding protein 1                                                                                   |
| Ralgapa2 | Ral GTPase activating protein, alpha subunit 2 (catalytic)                                               |
| Ralgapb  | Ralgapb Ral GTPase activating protein, beta subunit (non-catalytic)                                      |
| Ralgds   | ral guanine nucleotide dissociation stimulator                                                           |
| Ralgps1  | Ral GEF with PH domain and SH3 binding motif 1                                                           |
| Ralgps2  | Ral GEF with PH domain and SH3 binding motif 2                                                           |
| Ranbp10  | RAN binding protein 10                                                                                   |
| Ranbp3   | RAN binding protein 3                                                                                    |
| Rap1b    | RAS related protein 1b; similar to GTP-binding protein (smg p21B)                                        |
| Rap1gap  | Rap1 GTPase-activating protein                                                                           |
| Rap1gds1 | similar to RAP1, GTP-GDP dissociation stimulator 1; RAP1, GTP-GDP dissociation stimulator 1              |
| Rap2a    | RAS related protein 2a                                                                                   |
| Rap2b    | RAP2B, member of RAS oncogene family                                                                     |
| Rapgef1  | Rap guanine nucleotide exchange factor (GEF) 1                                                           |
| Rapgef2  | Rap guanine nucleotide exchange factor (GEF) 2                                                           |
| Rapgef3  | Rap guanine nucleotide exchange factor (GEF) 3                                                           |
| Rapgef4  | Rap guanine nucleotide exchange factor (GEF) 4                                                           |
| Rapgef11 | Rap guanine nucleotide exchange factor (GEF)-like 1                                                      |
| Rarg     | retinoic acid receptor, gamma                                                                            |
| Rasa2    | RAS p21 protein activator 2                                                                              |
| Rasa3    | RAS p21 protein activator 3                                                                              |
| Rasa4    | RAS p21 protein activator 4                                                                              |
| Rasal1   | RAS protein activator like 1 (GAP1 like)                                                                 |
| Rasd1    | RAS, dexamethasone-induced 1                                                                             |
| Rasd2    | RASD family, member 2                                                                                    |
| Rasgrf1  | RAS protein-specific guanine nucleotide-releasing factor 1                                               |
| Rasgrf2  | RAS protein-specific guanine nucleotide-releasing factor 2                                               |
| Rasgrp1  | RAS guanyl releasing protein 1                                                                           |
| Rasgrp2  | RAS, guanyl releasing protein 2                                                                          |

|         |                                                                                     |
|---------|-------------------------------------------------------------------------------------|
| Rasgrp3 | RAS, guanyl releasing protein 3                                                     |
| Rasgrp4 | RAS guanyl releasing protein 4                                                      |
| Rasl11b | RAS-like, family 11, member B                                                       |
| Rbj     | DnaJ (Hsp40) homolog, subfamily C, member 27                                        |
| Rbm27   | RNA binding motif protein 27                                                        |
| Rcl1    | RNA terminal phosphate cyclase-like 1                                               |
| Rel1    | RELT-like 1                                                                         |
| Rel2    | RELT-like 2                                                                         |
| Rem1    | rad and gem related GTP binding protein 1                                           |
| Reps1   | RalBP1 associated Eps domain containing protein                                     |
| Reps2   | RALBP1 associated Eps domain containing protein 2                                   |
| Rgnef   | Rho-guanine nucleotide exchange factor                                              |
| Rgs1    | regulator of G-protein signaling 1                                                  |
| Rgs10   | regulator of G-protein signalling 10                                                |
| Rgs11   | regulator of G-protein signaling 11; similar to regulator of G-protein signaling 11 |
| Rgs12   | regulator of G-protein signaling 12                                                 |
| Rgs13   | regulator of G-protein signaling 13                                                 |
| Rgs14   | regulator of G-protein signaling 14                                                 |
| Rgs16   | regulator of G-protein signaling 16                                                 |
| Rgs17   | regulator of G-protein signaling 17                                                 |
| Rgs18   | regulator of G-protein signaling 18                                                 |
| Rgs19   | regulator of G-protein signaling 19; similar to Regulator of G-protein signaling 19 |
| Rgs2    | regulator of G-protein signaling 2                                                  |
| Rgs20   | regulator of G-protein signaling 20                                                 |
| Rgs22   | regulator of G-protein signalling 22                                                |
| Rgs3    | regulator of G-protein signaling 3                                                  |
| Rgs4    | regulator of G-protein signaling 4                                                  |
| Rgs5    | regulator of G-protein signaling 5                                                  |
| Rgs6    | regulator of G-protein signaling 6                                                  |
| Rgs7    | regulator of G protein signaling 7                                                  |
| Rgs7bp  | regulator of G-protein signalling 7 binding protein                                 |
| Rgs8    | regulator of G-protein signaling 8                                                  |
| Rgs9    | regulator of G-protein signaling 9                                                  |
| Rgs9bp  | regulator of G-protein signalling 9 binding protein                                 |
| Rhbd11  | rhomboid, veinlet-like 1 (Drosophila)                                               |
| Rheb    | Ras homolog enriched in brain; similar to RAS-homolog enriched in brain             |
| Rhebl1  | Ras homolog enriched in brain like 1                                                |
| Rhod    | ras homolog gene family, member D                                                   |
| Rhog    | ras homolog gene family, member G                                                   |
| Rhoh    | ras homolog gene family, member H                                                   |
| Rhoj    | ras homolog gene family, member J                                                   |
| Rhoq    | ras homolog gene family, member Q                                                   |
| Rhot1   | ras homolog gene family, member T1                                                  |
| Rhot2   | ras homolog gene family, member T2                                                  |
| Rhou    | ras homolog gene family, member U                                                   |
| Rhov    | ras homolog gene family, member V                                                   |
| Rhpn2   | rhophilin, Rho GTPase binding protein 2                                             |
| Ric8    | resistance to inhibitors of cholinesterase 8 homolog (C. elegans)                   |

|         |                                                                                                              |
|---------|--------------------------------------------------------------------------------------------------------------|
| Ric8b   | resistance to inhibitors of cholinesterase 8 homolog B ( <i>C. elegans</i> )                                 |
| Rin1    | Ras and Rab interactor 1                                                                                     |
| Riok1   | RIO kinase 1 (yeast)                                                                                         |
| Riok2   | RIO kinase 2 (yeast)                                                                                         |
| Riok3   | RIO kinase 3 (yeast)                                                                                         |
| Ripk4   | receptor-interacting serine-threonine kinase 4                                                               |
| Rit1    | Ras-like without CAAX 1                                                                                      |
| Rit2    | Ras-like without CAAX 2                                                                                      |
| Rnd1    | Rho family GTPase 1                                                                                          |
| Rnd3    | Rho family GTPase 3                                                                                          |
| Rnu5g   | RNA, U5G small nuclear                                                                                       |
| Rod1    | ROD1 regulator of differentiation 1 ( <i>S. pombe</i> )                                                      |
| Ropn1   | ropporin, rhopilin associated protein 1                                                                      |
| Rpl28   | predicted gene 13226; predicted gene 15435; ribosomal protein L28; predicted gene 12938                      |
| Rpl35   | ribosomal protein L35; predicted gene 10269; predicted gene 8444; predicted gene 2000; predicted gene 4342   |
| Rpl36al | ribosomal protein L36A-like                                                                                  |
| Rpl37   | ribosomal protein L37                                                                                        |
| Rpl37a  | ribosomal protein L37a; predicted gene 4149; predicted gene 4613; predicted gene 14251; predicted gene 14173 |
| Rpl8    | ribosomal protein L8; similar to 60S ribosomal protein L8                                                    |
| Rps28   | ribosomal protein S28                                                                                        |
| Rps29   | ribosomal protein S29                                                                                        |
| Rps6kc1 | ribosomal protein S6 kinase polypeptide 1                                                                    |
| Rras    | Harvey rat sarcoma oncogene, subgroup R                                                                      |
| Rras2   | related RAS viral (r-ras) oncogene homolog 2                                                                 |
| Rrp15   | ribosomal RNA processing 15 homolog ( <i>S. cerevisiae</i> )                                                 |
| Rsu1    | Ras suppressor protein 1                                                                                     |
| Rtcd1   | RNA terminal phosphate cyclase domain 1                                                                      |
| Rtkn    | rhotekin                                                                                                     |
| Rufy2   | RUN and FYVE domain-containing 2                                                                             |
| Rwdd1   | predicted gene 12693; RWD domain containing 1; predicted gene 13743                                          |
| S100a16 | S100 calcium binding protein A16                                                                             |
| Sacm1l  | SAC1 (suppressor of actin mutations 1, homolog)-like ( <i>S. cerevisiae</i> )                                |
| Samd9l  | sterile alpha motif domain containing 9-like                                                                 |
| Sap30bp | similar to transcriptional regulator protein; SAP30 binding protein                                          |
| Saps3   | SAPS domain family, member 3                                                                                 |
| Sav1    | similar to WW45 protein; salvador homolog 1 ( <i>Drosophila</i> )                                            |
| Sbk1    | SH3-binding kinase 1                                                                                         |
| Sc4mol  | sterol-C4-methyl oxidase-like                                                                                |
| Scand1  | SCAN domain-containing 1                                                                                     |
| Sdad1   | SDA1 domain containing 1; similar to SDA1 domain containing 1                                                |
| Sec14l3 | SEC14-like 3 ( <i>S. cerevisiae</i> )                                                                        |
| Sec14l4 | SEC14-like 4 ( <i>S. cerevisiae</i> )                                                                        |
| Sec16b  | SEC16 homolog B ( <i>S. cerevisiae</i> )                                                                     |
| Sectm1a | secreted and transmembrane 1A                                                                                |
| Sectm1b | secreted and transmembrane 1B                                                                                |
| Sept14  | septin 14                                                                                                    |
| Serinc1 | serine incorporator 1                                                                                        |
| Serinc2 | serine incorporator 2; hypothetical protein LOC100044221                                                     |

|          |                                                                                 |
|----------|---------------------------------------------------------------------------------|
| Serinc3  | serine incorporator 3                                                           |
| Serinc4  | Serinc4 serine incorporator 4                                                   |
| Serinc5  | serine incorporator 5                                                           |
| Sfxn4    | sideroflexin 4                                                                  |
| Sgsm1    | small G protein signaling modulator 1                                           |
| Sgsm2    | small G protein signaling modulator 2                                           |
| Sgsm3    | small G protein signaling modulator 3                                           |
| Sh2d3c   | SH2 domain containing 3C                                                        |
| Sh3bgrl  | SH3-binding domain glutamic acid-rich protein like                              |
| Shoc2    | soc-2 (suppressor of clear) homolog (C. elegans)                                |
| Sidt1    | SID1 transmembrane family, member 1                                             |
| Sirpb1   | signal-regulatory protein beta 1                                                |
| Slc10a7  | solute carrier family 10 (sodium/bile acid cotransporter family), member 7      |
| Slc25a21 | solute carrier family 25 (mitochondrial oxodicarboxylate carrier), member 21    |
| Slc25a41 | solute carrier family 25, member 41                                             |
| Slc33a1  | solute carrier family 33 (acetyl-CoA transporter), member 1                     |
| Slc35a4  | predicted gene 5866; solute carrier family 35, member A4                        |
| Slc35b2  | solute carrier family 35, member B2                                             |
| Slc41a3  | solute carrier family 41, member 3                                              |
| Slfn4    | schlafen 4                                                                      |
| Slfn9    | similar to putative protein; schlafen 9; similar to schlafen 9                  |
| Slitrk2  | SLIT and NTRK-like family, member 2                                             |
| Slitrk4  | SLIT and NTRK-like family, member 4                                             |
| Sltm     | SAFB-like, transcription modulator                                              |
| Smad-ps1 | MAD homolog, pseudogene 1 (Drosophila)                                          |
| Smpdl3a  | sphingomyelin phosphodiesterase, acid-like 3A                                   |
| Snx13    | sorting nexin 13                                                                |
| Snx21    | sorting nexin family member 21                                                  |
| Snx26    | sorting nexin family member 26                                                  |
| Sos1     | son of sevenless homolog 1 (Drosophila)                                         |
| Sos2     | son of sevenless homolog 2 (Drosophila)                                         |
| Spata17  | spermatogenesis associated 17                                                   |
| Spata3   | spermatogenesis associated 3                                                    |
| Specc1   | sperm antigen with calponin homology and coiled-coil domains 1                  |
| Spg21    | spastic paraplegia 21 homolog (human); similar to spastic paraplegia 21 homolog |
| Spin2    | spindlin family, member 2                                                       |
| Spire2   | spire homolog 2 (Drosophila)                                                    |
| Spnb5    | spectrin beta 5                                                                 |
| Spryd4   | SPRY domain containing 4                                                        |
| Srgap1   | SLIT-ROBO Rho GTPase activating protein 1                                       |
| Srgap2   | SLIT-ROBO Rho GTPase activating protein 2                                       |
| Srgap3   | SLIT-ROBO Rho GTPase activating protein 3                                       |
| St5      | suppression of tumorigenicity 5                                                 |
| Stard10  | START domain containing 10                                                      |
| Stard9   | START domain containing 9                                                       |
| Stk33    | serine/threonine kinase 33                                                      |
| Suclg1   | succinate-CoA ligase, GDP-forming, alpha subunit                                |
| Svep1    | sushi, von Willebrand factor type A, EGF and pentraxin domain containing 1      |

|               |                                                                                                                                                |
|---------------|------------------------------------------------------------------------------------------------------------------------------------------------|
| Syap1         | synapse associated protein 1                                                                                                                   |
| Syf2          | SYF2 homolog, RNA splicing factor ( <i>S. cerevisiae</i> )                                                                                     |
| Tbc1d2        | TBC1 domain family, member 2                                                                                                                   |
| Tcf25         | transcription factor 25 (basic helix-loop-helix)                                                                                               |
| Tex2          | testis expressed gene 2                                                                                                                        |
| Tg(tgfb1)1der | transgene insertion 1, Dennis R Roop                                                                                                           |
| Tiam2         | T-cell lymphoma invasion and metastasis 2                                                                                                      |
| Timm44        | translocase of inner mitochondrial membrane 44                                                                                                 |
| Tlk2          | predicted gene 13161; tousled-like kinase 2 ( <i>Arabidopsis</i> )                                                                             |
| Tln2          | talin 2                                                                                                                                        |
| Tm4sf5        | transmembrane 4 superfamily member 5                                                                                                           |
| Tm9sf1        | transmembrane 9 superfamily member 1                                                                                                           |
| Tm9sf3        | transmembrane 9 superfamily member 3                                                                                                           |
| Tmem11        | transmembrane protein 11                                                                                                                       |
| Tmem150       | transmembrane protein 150                                                                                                                      |
| Tmem159       | transmembrane protein 159                                                                                                                      |
| Tmem16e       | transmembrane protein 16e                                                                                                                      |
| Tmem16f       | transmembrane protein 16f                                                                                                                      |
| Tmem22        | transmembrane protein 22                                                                                                                       |
| Tmem30b       | transmembrane protein 30B                                                                                                                      |
| Tmem30c       | transmembrane protein 30C                                                                                                                      |
| Tmem33        | transmembrane protein 33                                                                                                                       |
| Tmem8         | transmembrane protein 8 (five membrane-spanning domains)                                                                                       |
| Tmem85        | transmembrane protein 85                                                                                                                       |
| Tnik          | TRAF2 and NCK interacting kinase                                                                                                               |
| Tnk1          | tyrosine kinase, non-receptor, 1                                                                                                               |
| Tnk2          | tyrosine kinase, non-receptor, 2                                                                                                               |
| Tob2          | transducer of ERBB2, 2                                                                                                                         |
| Tomm7         | similar to translocase of outer mitochondrial membrane 7 homolog; translocase of outer mitochondrial membrane 7 homolog (yeast)                |
| Tpd52-ps      | tumor protein D52, pseudogene                                                                                                                  |
| Tpt1p         | predicted gene 1974; tumor protein, translationally-controlled 1 pseudogene; tumor protein, translationally-controlled 1; predicted gene 14456 |
| Tpt1-ps1      | tumor protein, translationally-controlled, pseudogene 1                                                                                        |
| Trappc9       | trafficking protein particle complex 9                                                                                                         |
| Trcg1         | taste receptor protein 1                                                                                                                       |
| Trim14        | tripartite motif-containing 14                                                                                                                 |
| Trim45        | tripartite motif-containing 45                                                                                                                 |
| Trim47        | tripartite motif-containing 47                                                                                                                 |
| Trim69        | tripartite motif-containing 69                                                                                                                 |
| Trio          | triple functional domain (PTPRF interacting)                                                                                                   |
| Trnp1         | TMF1-regulated nuclear protein 1                                                                                                               |
| Trp53i13      | transformation related protein 53 inducible protein 13                                                                                         |
| Trp53tg5      | transformation related protein 53 target 5                                                                                                     |
| Trpd52l3      | tumor protein D52-like 3                                                                                                                       |
| Trpt1         | tRNA phosphotransferase 1                                                                                                                      |
| Tssk3         | testis-specific serine kinase 3                                                                                                                |
| Ttc1          | tetratricopeptide repeat domain 1                                                                                                              |
| Tulp3         | tubby-like protein 3                                                                                                                           |
| Twf2          | twinfilin, actin-binding protein, homolog 2 ( <i>Drosophila</i> )                                                                              |



|         |                                                           |
|---------|-----------------------------------------------------------|
| Ube2w   | ubiquitin-conjugating enzyme E2W (putative)               |
| Ubl7    | ubiquitin-like 7 (bone marrow stromal cell-derived)       |
| Ubtfd2  | ubiquitin domain containing 2                             |
| Ubxtd5  | UBX domain protein 11                                     |
| Umpk-ps | uridine monophosphate kinase, pseudogene                  |
| Unc50   | unc-50 homolog (C. elegans)                               |
| Usmg5   | upregulated during skeletal muscle growth 5               |
| Usp6nl  | USP6 N-terminal like                                      |
| Usp-ps  | ubiquitin specific peptidase, pseudogene (USP17 homolog)  |
| Vav1    | vav 1 oncogene                                            |
| Vav2    | vav 2 oncogene                                            |
| Vrk3    | vaccinia related kinase 3                                 |
| Wdr12   | WD repeat domain 12; predicted gene 4879                  |
| Wdr13   | WD repeat domain 13                                       |
| Wdr16   | WD repeat domain 16                                       |
| Wdr25   | WD repeat domain 25                                       |
| Wdr3    | WD repeat domain 3                                        |
| Wdr45   | WD repeat domain 45                                       |
| Wdr6    | WD repeat domain 6                                        |
| Xrra1   | X-ray radiation resistance associated 1                   |
| Yme111  | YME1-like 1 (S. cerevisiae)                               |
| Ypel1   | yippee-like 1 (Drosophila)                                |
| Ypel3   | yippee-like 3 (Drosophila)                                |
| Zdhhc16 | zinc finger, DHHC domain containing 16                    |
| Zdhhc7  | zinc finger, DHHC domain containing 7                     |
| Zfand2a | zinc finger, AN1-type domain 2A                           |
| Zfand6  | zinc finger, AN1-type domain 6                            |
| Zfp113  | zinc finger protein 113                                   |
| Zfp12   | zinc finger protein 12                                    |
| Zfp212  | Zinc finger protein 212                                   |
| Zfp263  | zinc finger protein 263                                   |
| Zfp319  | zinc finger protein 319                                   |
| Zfp322a | zinc finger protein 322A                                  |
| Zfp326  | zinc finger protein 326                                   |
| Zfp383  | zinc finger protein 383                                   |
| Zfp414  | zinc finger protein 414                                   |
| Zfp418  | zinc finger protein 418                                   |
| Zfp445  | zinc finger protein 445                                   |
| Zfp449  | zinc finger protein 449                                   |
| Zfp458  | zinc finger protein 458                                   |
| Zfp58   | zinc finger protein 58                                    |
| Zfp612  | zinc finger protein 612                                   |
| Zfp622  | zinc finger protein 622                                   |
| Zfp641  | zinc finger protein 641                                   |
| Zfp689  | zinc finger protein 689                                   |
| Zfp74   | zinc finger protein 74; hypothetical protein LOC100044255 |
| Zfp97   | zinc finger protein 97; cDNA sequence BC018101            |
| Zfyve27 | zinc finger, FYVE domain containing 27                    |

**Table S21. *Textrovs!*-mediated Collective mode analysis of bPTH(7-34) superconserved dataset.** For each identified word the Cosine Similarity, Z score and P value are given.

| <b>Word</b>        | <b>Cosine Similarity</b> | <b>Z score</b> | <b>P value</b> |
|--------------------|--------------------------|----------------|----------------|
| creb-binding       | 0.459745268              | 2.016553221    | 0.021847757    |
| protein-binding    | 0.449445286              | 1.97336052     | 0.024247781    |
| acetyltransferases | 0.444120311              | 1.951030381    | 0.025528523    |
| acetylated         | 0.436610839              | 1.919539608    | 0.02742895     |
| coactivators       | 0.43261819               | 1.902796541    | 0.028520273    |
| acetylation        | 0.431672402              | 1.898830404    | 0.028782238    |
| trans-activation   | 0.428811772              | 1.886834429    | 0.029580163    |
| acetyltransferase  | 0.425936906              | 1.874778755    | 0.030396362    |
| quercetin          | 0.423964122              | 1.866505938    | 0.030950794    |
| coactivator        | 0.420383922              | 1.851492464    | 0.032084777    |
| adenovirus         | 0.415617483              | 1.83150453     | 0.03347571     |
| transactivation    | 0.415567477              | 1.831294832    | 0.033550272    |
| smad               | 0.413212156              | 1.821417853    | 0.034303428    |
| nonhistone         | 0.410089164              | 1.808321671    | 0.03530325     |
| acetylase          | 0.410013788              | 1.808005581    | 0.03530325     |
| transactivators    | 0.407318747              | 1.796704       | 0.03616781     |
| sclera             | 0.403944073              | 1.782552394    | 0.037293152    |
| scleroderma        | 0.403068556              | 1.778880937    | 0.037619881    |
| staurosporine      | 0.401880926              | 1.773900642    | 0.038031575    |
| tad                | 0.400530617              | 1.768238159    | 0.038530452    |
| anti-apoptotic     | 0.397999305              | 1.757623167    | 0.039373755    |
| non-histone        | 0.394498279              | 1.742941707    | 0.040666807    |
| hdac               | 0.392242588              | 1.733482529    | 0.041547834    |
| amp-responsive     | 0.388605941              | 1.718232345    | 0.042898308    |
| hydroxamic         | 0.385954824              | 1.707114956    | 0.043911026    |
| deacetylase        | 0.376771575              | 1.668605246    | 0.04755869     |
| vpr                | 0.376519156              | 1.667546732    | 0.047657863    |
| collagen           | 0.37413997               | 1.657569682    | 0.048658733    |
| transactivator     | 0.371999701              | 1.64859452     | 0.049573817    |
| connective         | 0.368116069              | 1.63230861     | 0.051339743    |
| jurkat             | 0.364922136              | 1.618914939    | 0.052723632    |
| procollagen        | 0.363385396              | 1.612470662    | 0.05348097     |
| activation         | 0.360721361              | 1.601299101    | 0.05468846     |
| nucleosomal        | 0.357752231              | 1.588848133    | 0.056030196    |
| element-binding    | 0.355503802              | 1.579419407    | 0.057168029    |
| imperfecta         | 0.353969212              | 1.572984144    | 0.057859409    |

|                     |             |             |             |
|---------------------|-------------|-------------|-------------|
| histones            | 0.352819634 | 1.568163419 | 0.058440566 |
| apoptosome          | 0.348169941 | 1.548665054 | 0.06069086  |
| cofactors           | 0.347410836 | 1.545481769 | 0.061173132 |
| histone             | 0.346418258 | 1.541319418 | 0.061658393 |
| pro                 | 0.341666567 | 1.52139333  | 0.064129919 |
| osteogenesis        | 0.340984912 | 1.518534827 | 0.064381248 |
| t-lymphotropic      | 0.337888258 | 1.505549092 | 0.066033587 |
| collagens           | 0.336931199 | 1.501535689 | 0.066548554 |
| dermal              | 0.332460284 | 1.482787025 | 0.069037205 |
| chloromethyl        | 0.329871973 | 1.471933013 | 0.070510439 |
| phosphorylation     | 0.329835078 | 1.471778292 | 0.070510439 |
| end-labeling        | 0.329669832 | 1.47108534  | 0.070645558 |
| oncoproteins        | 0.329383449 | 1.469884398 | 0.070780877 |
| intrinsic           | 0.329274214 | 1.469426325 | 0.070916395 |
| heat-shock          | 0.326947039 | 1.45966738  | 0.072145037 |
| pkc-delta           | 0.326056935 | 1.455934753 | 0.07269631  |
| fibroblasts         | 0.325368727 | 1.453048771 | 0.073111877 |
| deacetylases        | 0.323401838 | 1.444800674 | 0.074228943 |
| protease-activating | 0.323162783 | 1.443798201 | 0.074369488 |
| ccaat               | 0.323146509 | 1.443729957 | 0.074369488 |
| decorin             | 0.32304198  | 1.443291616 | 0.074510236 |
| caspases            | 0.321265962 | 1.435843932 | 0.075501171 |
| col                 | 0.320407968 | 1.432245959 | 0.076071911 |
| tendon              | 0.319946234 | 1.430309689 | 0.07635851  |
| tendons             | 0.319265119 | 1.427453452 | 0.076789947 |
| shock               | 0.316056957 | 1.414000109 | 0.078680951 |
| ehlers-danlos       | 0.315559619 | 1.411914536 | 0.078974981 |
| camp-responsive     | 0.315224272 | 1.410508269 | 0.079122307 |
| heat                | 0.315166091 | 1.410264287 | 0.079269841 |
| alpha-crystallin    | 0.314969832 | 1.409441279 | 0.079417584 |
| hsp                 | 0.31455087  | 1.407684374 | 0.079565535 |
| caspase             | 0.314333853 | 1.406774321 | 0.079713694 |
| apoptosis           | 0.313570236 | 1.40357211  | 0.080159425 |
| initiator           | 0.312559165 | 1.399332211 | 0.080906492 |
| trimerization       | 0.309336399 | 1.385817627 | 0.082873452 |
| chaperone           | 0.308470571 | 1.382186801 | 0.083485851 |
| apoptotic           | 0.307902806 | 1.379805896 | 0.083793322 |
| pro-apoptotic       | 0.30767495  | 1.378850387 | 0.083947377 |
| inhibited           | 0.306252859 | 1.372886887 | 0.084876173 |
| trans-activator     | 0.30548752  | 1.369677457 | 0.085343451 |
| gabp                | 0.304073525 | 1.363747905 | 0.086283783 |

|                                 |             |             |             |
|---------------------------------|-------------|-------------|-------------|
| remodeling                      | 0.3020365   | 1.355205694 | 0.087708779 |
| c-myb                           | 0.300593016 | 1.349152484 | 0.088668483 |
| phosphopeptides                 | 0.29991948  | 1.34632803  | 0.089151258 |
| templates                       | 0.299888151 | 1.346196652 | 0.089151258 |
| factor-beta                     | 0.299763899 | 1.345675605 | 0.089151258 |
| unfolding                       | 0.299551254 | 1.344783881 | 0.089312617 |
| antagonist-killer               | 0.298446462 | 1.340150965 | 0.090122672 |
| collagenase                     | 0.295642567 | 1.328392906 | 0.092089053 |
| acetyl                          | 0.294708821 | 1.324477268 | 0.092751522 |
| fractures                       | 0.294061833 | 1.321764143 | 0.093084075 |
| palpebral                       | 0.293551128 | 1.319622514 | 0.093417509 |
| inhibition                      | 0.293049129 | 1.317517396 | 0.093751824 |
| s-nitroso-n-acetylpenicillamine | 0.292534647 | 1.31535993  | 0.094254951 |
| myofibroblast                   | 0.291493468 | 1.310993772 | 0.094928882 |
| potentiated                     | 0.289268678 | 1.301664172 | 0.096458193 |
| heteroduplexes                  | 0.289024752 | 1.300641278 | 0.096629227 |
| fracture                        | 0.288873762 | 1.300008106 | 0.096800485 |
| translocated                    | 0.288856721 | 1.299936643 | 0.096800485 |
| chondrocyte-specific            | 0.287413027 | 1.293882551 | 0.09783271  |
| antihuman                       | 0.286477873 | 1.289961006 | 0.098525329 |
| zap                             | 0.285949531 | 1.28774542  | 0.098872982 |
| transforming                    | 0.285533483 | 1.286000734 | 0.099221531 |
| bromide                         | 0.285149076 | 1.284388732 | 0.099570978 |

**Table S22. *Textrousl*-based noun extraction from theoretical and empirically-derived transcriptomic datasets.** The *Textrousl*-extracted nouns associated with the input transcript terms from the LSI-derived 'arrestin signaling' theoretical dataset and the superconserved datasets from hPTH(1-34)- and bPTH(7-34)-treated mice are denoted in each column. Nouns in standard type were extracted using the Collective *Textrousl* processing module and the nouns in italics were extracted using the Individual *Textrousl* processing module.

| <b>LSI-derived 'arrestin signaling'</b> | <b>hPTH(1-34) superconserved</b> | <b>bPTH(7-34) superconserved</b> |
|-----------------------------------------|----------------------------------|----------------------------------|
| phosphorylation                         | presenilin                       | creb-binding                     |
| kinase                                  | presenilins                      | protein-binding                  |
| serine-threonine                        | gamma-secretase                  | acetyltransferases               |
| phosphorylating                         | beta-peptide                     | acetylated                       |
| rapamycin                               | beta-protein                     | coactivators                     |
| amp-dependent                           | fad                              | acetylation                      |
| camp-dependent                          | amyloid                          | trans-activation                 |
| pka                                     | paraparesis                      | acetyltransferase                |
| pkc-alpha                               | aspartyl                         | quercetin                        |
| transduction                            | beta-amyloid                     | coactivator                      |
| phosphopeptides                         | amyloidogenic                    | adenovirus                       |
| catalytic                               | precursor                        | transactivation                  |
| c-akt                                   | early-onset                      | smad                             |
| phosphoamino                            | alzheimer's                      | nonhistone                       |
| cascades                                | nf-kappab                        | acetylase                        |
| c-alpha                                 | beta-secretase                   | transactivators                  |
| forskolin                               | nf-kappa                         | sclera                           |
| cgmp-dependent                          | dysarthria                       | scleroderma                      |
| c-beta                                  | spastic                          | staurosporine                    |
| a-kinase                                | kappab                           | tad                              |
| downstream                              | alzheimer                        | anti-apoptotic                   |
| beta-galactoside                        | ikappabalpha                     | non-histone                      |
| activation                              | ikappab                          | hdac                             |
| phosphopeptide                          | ikk                              | amp-responsive                   |
| phosphoserine                           | c-rel                            | hydroxamic                       |
| kinases                                 | gsk                              | deacetylase                      |
| amp-activated                           | senile                           | vpr                              |
| phosphospecific                         | familial                         | collagen                         |
| phosphatidylinositol                    | nf-kb                            | transactivator                   |
| cyclic                                  | sulfide                          | connective                       |
| galphaq                                 | knock-in                         | jurkat                           |
| anchor                                  | hydrophilic                      | procollagen                      |
| cascade                                 | impairments                      | activation                       |
| photons                                 | late-onset                       | nucleosomal                      |
| serine                                  | cleavages                        | element-binding                  |
| pkc-delta                               | factor-kappab                    | imperfecta                       |
| holoenzymes                             | angiopathy                       | histones                         |
| phosphorylations                        | single-photon                    | apoptosome                       |

|                       |                         |                     |
|-----------------------|-------------------------|---------------------|
| cenocopia             | phenethyl               | cofactors           |
| pumping               | deficits                | histone             |
| rhodopsin             | neuritic                | pro                 |
| receptor-mediated     | hemorrhages             | osteogenesis        |
| gmp-dependent         | lanthanum               | t-lymphotropic      |
| gs                    | onset                   | collagens           |
| monophosphate         | caffeic                 | dermal              |
| cross-talk            | inulin                  | phosphorylation     |
| sector                | age-related             | chloromethyl        |
| methanobacterium      | neurogenesis            | end-labeling        |
| bleaching             | myoclonus               | oncoproteins        |
| diacylglycerol        | emission-computed       | intrinsic           |
| phosphatidylinositide | deposits                | heat-shock          |
| dbcamp                | dantrolene              | pkc-delta           |
| sialyltransferase     | presymptomatic          | fibroblasts         |
| phosphoinositide      | sulfonamides            | deacetylases        |
| activated             | proteolytic             | protease-activating |
| heterotrimeric        | nf                      | ccaat               |
| aicar                 | neurotoxic              | decorin             |
| phorbol               | plaques                 | caspases            |
| pkc-epsilon           | cleavage                | col                 |
| okadaic               | b-dna                   | tendon              |
| arrestin              | pharynx                 | tendons             |
| beta-adrenergic       | kikuchi                 | shock               |
| stimulation           | jejuni                  | ehlers-danlos       |
| biosensors            | co-immunoprecipitations | camp-responsive     |
| dag                   | comment                 | heat                |
| raft                  | mercury                 | alpha-crystallin    |
| beta-ar               | deposit                 | hsp                 |
| alpha-subunit         | hsu                     | caspase             |
| signaling             | congo                   | apoptosis           |
| riboside              | deoxycholate            | initiator           |
| pdgfr                 | stearic                 | trimerization       |
| phototransduction     | curcumin                | chaperone           |
| hormone-sensitive     | synaptosomal            | apoptotic           |
| particulate           | brains                  | pro-apoptotic       |
| lipofuscin            | ki                      | inhibited           |
| subunit               | disruptions             | trans-activator     |
| cyclase               | mini                    | gabp                |
| methanothermobacter   | cutting                 | remodeling          |
| couple                | fragments               | c-myb               |
| rafts                 | herb                    | phosphopeptides     |
| pigment               | cleaving                | templates           |
| rii                   | mexico                  | factor-beta         |
| opsin                 | proteolysis             | unfolding           |
| peutz-jeghers         | cyclo-oxygenase         | antagonist-killer   |
| phosphatidyl          | pre-clinical            | collagenase         |
| gtp-binding           | pathology               | acetyl              |

|                      |                       |                                 |
|----------------------|-----------------------|---------------------------------|
| lamellipodia         | emsa                  | fractures                       |
| adenyl               | flippase              | palpebral                       |
| esters               | photolysis            | inhibition                      |
| tyrosyl              | neprilysin            | s-nitroso-n-acetylpenicillamine |
| pathways             | spheroid              | myofibroblast                   |
| calmodulin-dependent | sulindac              | potentiated                     |
| opsins               | subiculum             | heteroduplexes                  |
| cone                 | brdu                  | fracture                        |
| beta-subunit         | myoclonic             | translocated                    |
| nak                  | high-molecular-weight | chondrocyte-specific            |
| isoproterenol        | headache              | antihuman                       |
| ceramide             | confusion             | zap                             |
| cones                | account               | transforming                    |
| cats                 | channel-interacting   | bromide                         |
| opsins               | oxidation             | phosphorylation                 |
| pigment              | clone                 | phosphopeptide                  |
| rhodopsin            | exons                 | kinase                          |
| opsin                | sequence              | phosphorylating                 |
| visual               | introns               | serine-threonine                |
| vision               | exon                  | activation                      |
| photons              | amino                 | amp-activated                   |
| camp-dependent       | clones                | phosphopeptides                 |
| bleaching            | cdna                  | pkc-delta                       |
| catalytic            | lectin                | aicar                           |
| cgmp-dependent       | mitochondrial         | a-kinase                        |
| lipofuscin           | ophthalmoplegia       | c-akt                           |
| kinase               | oxidants              | cenocopia                       |
| degeneration         | chromatographies      | downstream                      |
| beta-galactoside     | purified              | phosphoamino                    |
| retina               | encoded               | cgmp-dependent                  |
| rods                 | structural            | rapamycin                       |
| cone                 | coding                | dbcamp                          |
| g-protein            | isolated              | mitochondrial                   |
| retinitis            | congenital            | gtpase                          |
| cones                | alpha-aminoadipate    | gtpase-activating               |
| photoreceptors       | conservation          | amp-dependent                   |
| photoreceptor        | geobacillus           | ribonucleoside                  |
| photosensitive       | adipocytes            | pka                             |
| esters               | formylated            | transduction                    |
| electroretinography  | homology              | camp-dependent                  |
| pigmentosa           | reading               | gtp-binding                     |
| degenerations        | cytosolic             | pkc-alpha                       |
| rod                  | pseudogene            | okadaic                         |
| amaurosis            | mitochondria          | kinases                         |
| retinal              | bird                  | gastrocnemius                   |
| retinas              | transcripts           | hormone-sensitive               |
| photopic             | identical             | phosphorylations                |
| scotopic             | fatty                 | coiled-coil                     |

|                          |                       |                             |
|--------------------------|-----------------------|-----------------------------|
| <i>degenerative</i>      | <i>analysis</i>       | <i>lamellipodia</i>         |
| <i>pupillary</i>         | <i>alternative</i>    | <i>c-alpha</i>              |
| <i>phosphodiesterase</i> | <i>amplified</i>      | <i>biosensors</i>           |
| <i>amp-dependent</i>     | <i>isolation</i>      | <i>gtp-dependent</i>        |
| <i>receptors</i>         | <i>transcript</i>     | <i>forskolin</i>            |
| <i>leber</i>             | <i>identification</i> | <i>mitochondria</i>         |
| <i>phototransduction</i> | <i>sequences</i>      | <i>anchor</i>               |
| <i>arrestin</i>          | <i>habitats</i>       | <i>catalytic</i>            |
| <i>beta-subunit</i>      | <i>mutational</i>     | <i>gelsolin</i>             |
| <i>g-protein-coupled</i> | <i>fingers</i>        | <i>riboside</i>             |
| <i>rod-cone</i>          | <i>early-onset</i>    | <i>phosphatidylinositol</i> |
| <i>illumination</i>      | <i>genomics</i>       | <i>pkc-epsilon</i>          |
| <i>blind</i>             | <i>autosomal</i>      | <i>oligomycin</i>           |
| <i>methanobacterium</i>  | <i>amyloid</i>        | <i>guanine</i>              |
| <i>blindness</i>         | <i>counseling</i>     | <i>cytoskeleton</i>         |
| <i>pka</i>               | <i>hot</i>            | <i>exchange</i>             |



**Table S23. *Textrousl*-mediated Collective mode noun-phrase analysis of bPTH(7-34) superconserved dataset.** For each identified noun-phrase the Cosine Similarity score is given.

| <b>Collective: noun-phrases</b>    | <b>Cosine Similarity</b> |
|------------------------------------|--------------------------|
| aberrant chromatin acetylation     | 0.396099471              |
| abnormal apoptotic response        | 0.261078909              |
| abnormal collagenase               | 0.206897569              |
| abnormal histone acetylation       | 0.405230509              |
| abnormal histone acetylation       | 0.405230509              |
| abnormal tubulin acetylation       | 0.389735145              |
| absent deep tendon                 | 0.184642253              |
| absent deep tendon reflexes        | 0.165766921              |
| absent phosphorylation             | 0.32413618               |
| accelerated apoptotic death        | 0.271510356              |
| acetyl                             | 0.294695351              |
| acetyl group                       | 0.163036767              |
| acetyl groups                      | 0.172034786              |
| acetylase                          | 0.410012973              |
| acetylated                         | 0.436594697              |
| acetylated actin                   | 0.135882134              |
| acetylated alpha-tubulin           | 0.414708313              |
| acetylated bovine serum albumin    | 0.190951071              |
| acetylated chromatin               | 0.349610414              |
| acetylated histone                 | 0.380570676              |
| acetylated histone                 | 0.380570676              |
| acetylated histone binding         | 0.384968165              |
| acetylated histone binding         | 0.384968165              |
| acetylated histone levels          | 0.367981875              |
| acetylated histone levels          | 0.367981875              |
| acetylated histones                | 0.423136915              |
| acetylated histones                | 0.423136915              |
| acetylated low density lipoprotein | 0.114103766              |
| acetylated low-density lipoprotein |                          |
| acetylated lysine                  | 0.390013511              |
| acetylated n-terminal alanine      | 0.380599283              |
| acetylated nucleosomes             | 0.418477984              |
| acetylated residues                | 0.383716106              |
| acetylated substrates              | 0.421835814              |
| acetylated tubulin peptide         | 0.16778485               |
| acetylation                        | 0.431650017              |

|                                                   |             |
|---------------------------------------------------|-------------|
| acetylation carcinogenic amines                   | 0.400130634 |
| acetylation defects                               | 0.4001759   |
| acetylation polymorphism                          | 0.343522778 |
| acetylation state                                 | 0.430887876 |
| acetylation status                                | 0.426927946 |
| acetyl-coa acetyltransferases                     | 0.438572418 |
| acetyltransferase                                 | 0.425934545 |
| acetyltransferase activity                        | 0.441590817 |
| acetyltransferase domain                          | 0.389401658 |
| acetyltransferases                                | 0.444106332 |
| acidic activation                                 | 0.361541431 |
| acidic activation domain                          | 0.358800912 |
| acidic transactivator domain                      | 0.174728427 |
| actin remodeling                                  | 0.032291199 |
| actin skeleton remodeling machinery               | 0.036624943 |
| activated acetyl residues                         | 0.229941449 |
| activated caspases                                | 0.357196744 |
| activated fibroblasts                             | 0.385954899 |
| activated heat shock loci                         | 0.315290693 |
| activated heat shock loci                         | 0.315290693 |
| activated heat-shock factor transcription factors | 0.33801528  |
| activated histone marks                           | 0.377619041 |
| activated smad                                    | 0.466231727 |
| activating heat-shock genes                       | 0.284113609 |
| activation                                        | 0.360768213 |
| activation assay                                  | 0.377901875 |
| activation cascade                                | 0.358063939 |
| activation contraction                            | 0.36441909  |
| activation curves                                 | 0.360244811 |
| activation domain                                 | 0.361175696 |
| activation energies                               | 0.360373595 |
| activation energy                                 | 0.363151478 |
| activation factors                                | 0.366309911 |
| activation mechanism                              | 0.3598018   |
| activation programs                               | 0.3600776   |
| activation reaction                               | 0.360880066 |
| activation segment phosphorylation                | 0.403910359 |
| activation segment phosphorylation                | 0.403910359 |
| activation sites                                  | 0.363686456 |
| activation state                                  | 0.358868743 |
| activation states                                 | 0.360235646 |

|                                            |              |
|--------------------------------------------|--------------|
| active caspases                            | 0.329055311  |
| active collagenase                         | 0.310872931  |
| active histone deacetylase complex         | 0.355299093  |
| active histone deacetylase complex         | 0.355299093  |
| active histone marks                       | 0.350790074  |
| active remodeling                          | 0.308737627  |
| acute septic shock                         | 0.277959643  |
| acute transforming retroviruses            | 0.230883491  |
| additive inhibition                        | 0.2794893    |
| adenovirus                                 | 0.415612797  |
| adenovirus biology                         | 0.392747452  |
| adenovirus dna replication                 |              |
| adenovirus dna-binding protein             | 0.187454477  |
| adenovirus infection                       | 0.062340214  |
| adenovirus lacz                            | 0.169625734  |
| adenovirus late infection                  | 0.04343772   |
| adenovirus life cycle                      | 0.058481091  |
| adenovirus major late promoter             | 0.210490854  |
| adenovirus particles                       | 0.297730462  |
| adenovirus protein                         | 0.235655398  |
| adenovirus replication                     | -0.010630327 |
| adenovirus trafficking                     | 0.072938056  |
| adenovirus transfer                        | 0.201467247  |
| adenovirus vector                          | 0.413672218  |
| adenovirus vectors                         | 0.375124044  |
| adult bone remodeling                      | 0.098635787  |
| adult fibroblasts                          | 0.243316147  |
| adventitial fibroblasts                    | 0.330730879  |
| aging stromal fibroblasts                  | 0.240708117  |
| airway collagen deposition                 | 0.368984986  |
| ala partially inhibited transport activity | 0.089791641  |
| allergen activation                        | 0.358170494  |
| alpha-amanitin inhibition                  | 0.289322164  |
| alpha-crystallin                           | 0.31493555   |
| alpha-crystallin domain                    | 0.199434952  |
| alpha-crystallin domain characteristic     | 0.18273001   |
| alpha-crystallin expression                |              |
| alpha-tubulin acetylation                  | 0.426918014  |
| alveolar remodeling                        | 0.145452159  |
| alveolar remodeling response               | 0.138469208  |
| amelogenesis imperfecta                    | 0.364336504  |

|                                           |             |
|-------------------------------------------|-------------|
| amelogenesis imperfecta type iii          | 0.323246803 |
| amino-terminal activation domain          | 0.360715612 |
| amino-terminal caspase recruitment domain | 0.352882155 |
| amino-terminal transactivation domain     | 0.375198032 |
| amnion fibroblasts                        | 0.315221557 |
| amp-responsive                            | 0.388555037 |
| angiogenic remodeling                     | 0.213059045 |
| angiogenic vascular remodeling            | 0.142235604 |
| ankyrin repeat-containing cofactors       | 0.016953871 |
| antagonist-killer                         | 0.298482878 |
| antiangiogenic collagen fragments         | 0.371183699 |
| anti-apoptotic                            | 0.39798591  |
| anti-apoptotic agent                      | 0.375892248 |
| anti-apoptotic effects                    | 0.289351002 |
| anti-apoptotic genes                      |             |
| anti-apoptotic mechanisms                 | 0.331636432 |
| antibiotic staurosporine                  | 0.290806038 |
| antibody inhibition                       | 0.243469534 |
| antigen presentation coactivators         |             |
| antihuman                                 | 0.286414077 |
| antisense inhibition                      | 0.263149497 |
| antisense inhibition experiments          | 0.232622316 |
| antisense oligonucleotide inhibition      | 0.249490818 |
| aortic wall collagen                      | 0.371634589 |
| apical caspase                            | 0.292515739 |
| apoptosis                                 | 0.313576191 |
| apoptosis assay                           | 0.323136455 |
| apoptosis concomitant                     | 0.31231047  |
| apoptosis factor aif                      | 0.323454591 |
| apoptosis induction                       | 0.311170814 |
| apoptosis inhibition                      | 0.345251127 |
| apoptosis inhibition                      | 0.345251127 |
| apoptosis inhibitor                       | 0.351669821 |
| apoptosis mediated                        | 0.323576053 |
| apoptosis protein                         | 0.321948176 |
| apoptosis protein binding motif           | 0.342275422 |
| apoptosis rates                           | 0.309583242 |
| apoptosis reduction                       | 0.309081608 |
| apoptosis regulator                       | 0.308056019 |
| apoptosis repeat                          | 0.305158083 |
| apoptosis required interaction            | 0.327357067 |

|                                    |             |
|------------------------------------|-------------|
| apoptosis resistance               | 0.306879861 |
| apoptosis signal                   | 0.313598589 |
| apoptosis signal-regulating kinase | 0.339115412 |
| apoptosis substrates               | 0.314717213 |
| apoptosome                         | 0.34817123  |
| apoptosome complex                 |             |
| apoptosome formation               | 0.260292205 |
| apoptotic                          | 0.307900989 |
| apoptotic activities               | 0.317662967 |
| apoptotic activity                 | 0.367642438 |
| apoptotic bodies                   | 0.285988762 |
| apoptotic body formation           | 0.256882892 |
| apoptotic cardiac myocytes         | 0.23403684  |
| apoptotic cardiomyocyte death      | 0.310808667 |
| apoptotic cardiomyocytes           | 0.308742167 |
| apoptotic cascades                 | 0.311939609 |
| apoptotic cell death               | 0.240677466 |
| apoptotic cell feeding             | 0.218125465 |
| apoptotic challenge                | 0.292510953 |
| apoptotic chromatin                | 0.379598928 |
| apoptotic competence               | 0.30569955  |
| apoptotic conditions               | 0.30806602  |
| apoptotic control                  | 0.2922081   |
| apoptotic corpses                  | 0.307580007 |
| apoptotic death                    | 0.295393754 |
| apoptotic defects                  | 0.226182861 |
| apoptotic degeneration             | 0.212971776 |
| apoptotic destruction              | 0.291702207 |
| apoptotic domains                  | 0.304329542 |
| apoptotic effect                   | 0.313912448 |
| apoptotic effects                  | 0.305259288 |
| apoptotic elimination              | 0.294800832 |
| apoptotic events                   | 0.300971567 |
| apoptotic fraction                 | 0.298231274 |
| apoptotic hepatocyte cell death    | 0.244794758 |
| apoptotic hepatocytes              | 0.28539229  |
| apoptotic inducer                  | 0.313806897 |
| apoptotic inducers                 | 0.309157496 |
| apoptotic induction                | 0.291286199 |
| apoptotic initiator caspase        | 0.331940591 |
| apoptotic initiator caspase        | 0.331940591 |

|                                 |             |
|---------------------------------|-------------|
| apoptotic initiator caspase     | 0.331940591 |
| apoptotic injury                | 0.269172476 |
| apoptotic keratinocytes         | 0.248086809 |
| apoptotic kinetics              | 0.280833163 |
| apoptotic leukocytes            | 0.311462566 |
| apoptotic loss                  | 0.237370334 |
| apoptotic machinery             | 0.306597843 |
| apoptotic markers               | 0.294755566 |
| apoptotic mechanism             | 0.323818286 |
| apoptotic mechanisms            | 0.298262957 |
| apoptotic mimicry               | 0.30838689  |
| apoptotic muscle degeneration   | 0.232949227 |
| apoptotic neutrophils           | 0.255563633 |
| apoptotic nuclei                | 0.289849927 |
| apoptotic outcome               | 0.303480034 |
| apoptotic pathway               | 0.257041565 |
| apoptotic pathways              | 0.288908273 |
| apoptotic process               | 0.297217585 |
| apoptotic processes             | 0.303081898 |
| apoptotic program               | 0.305754446 |
| apoptotic programs              | 0.30817811  |
| apoptotic proteases             | 0.285914668 |
| apoptotic proteins              | 0.258489327 |
| apoptotic reagent staurosporine | 0.324488828 |
| apoptotic reagent staurosporine | 0.324488828 |
| apoptotic regression            | 0.282200737 |
| apoptotic regulators            | 0.278819107 |
| apoptotic response              | 0.286822781 |
| apoptotic responses             | 0.220077225 |
| apoptotic retardation           | 0.279662593 |
| apoptotic selective pressure    | 0.278433345 |
| apoptotic sensitivity           | 0.270258341 |
| apoptotic signal                | 0.297206593 |
| apoptotic signals               | 0.293338059 |
| apoptotic stimulus              | 0.305541569 |
| apoptotic stress                | 0.310801284 |
| apoptotic targets               | 0.295091878 |
| arch artery remodeling          | 0.225242591 |
| arterial remodeling             | 0.238970688 |
| arterial wall remodeling        | 0.197649351 |
| astrocyte activation            | 0.37221367  |

|                                                        |              |
|--------------------------------------------------------|--------------|
| asymmetric remodeling                                  | 0.225558896  |
| atp-dependent chromatin remodeling activity            | 0.316937997  |
| atp-dependent chromatin remodeling mechanisms          | 0.284149592  |
| atp-dependent nucleosome remodeling                    | 0.336203736  |
| atp-dependent nucleosome remodeling activities         | 0.33607256   |
| atp-dependent phosphorylation                          | 0.341982419  |
| attenuated apoptosis                                   | 0.318361737  |
| atypical collagen complexes                            | 0.376803683  |
| autonomic activation                                   |              |
| autonomous transactivation domain                      | 0.383269989  |
| autosomal dominant hsp                                 | 0.233583788  |
| autosomal dominant hypoplastic amelogenesis imperfecta | 0.255524358  |
| average fibroblasts                                    | 0.328446101  |
| avian fibroblasts                                      | 0.30913025   |
| baby hamster fibroblasts                               | 0.304480407  |
| baby hamster kidney fibroblasts                        |              |
| bacterial chaperone dnaj                               | 0.26609469   |
| bacterial chloramphenicol acetyltransferase            | 0.374038652  |
| bacterial collagenase                                  | 0.172161935  |
| bacterial septic shock                                 | 0.280704989  |
| baculoviral caspase inhibitor                          | 0.359890355  |
| basal apoptosis                                        | 0.317187876  |
| basal phosphorylation                                  | 0.326242602  |
| baseline microvascular endothelial apoptosis           | 0.30972618   |
| basement membrane collagens                            | 0.136627293  |
| beta-catenin transactivation                           |              |
| bind acetyl groups                                     | 0.219184932  |
| bind collagen                                          | 0.381006518  |
| bind phosphopeptides                                   | 0.230731995  |
| binding inhibition                                     | 0.274342666  |
| blocking apoptosis                                     | 0.31947844   |
| blocks apoptosis                                       | 0.315275688  |
| blue sclera                                            | 0.187322452  |
| bone fracture                                          | 0.099248776  |
| bone fracture repair                                   | -0.005509085 |
| bone fractures                                         | 0.091891496  |
| bone remodeling                                        | 0.124952513  |
| bone remodeling factor                                 | 0.133300688  |
| bound collagen                                         | 0.377313693  |
| brain-specific chromatin remodeling complexes          | 0.243053937  |
| brain-specific membrane-bound collagen                 | 0.36795334   |

|                                                         |              |
|---------------------------------------------------------|--------------|
| broad caspase inhibitor                                 | 0.36135948   |
| bromide                                                 | 0.285129605  |
| bulk histone preparation                                | 0.343058436  |
| calcium-dependent inhibition                            | 0.264378143  |
| calf thymus core histones                               | 0.177198348  |
| calnexin chaperone system                               | 0.268918841  |
| camp-dependent activation                               | 0.384744686  |
| camp-dependent inhibition                               | 0.306514733  |
| camp-dependent phosphorylation                          | 0.323827224  |
| camp-responsive                                         | 0.315228826  |
| camp-responsive calcium currents                        | -0.095067407 |
| camp-responsive element-binding protein phosphorylation | 0.376180503  |
| camp-responsive element-binding protein phosphorylation | 0.376180503  |
| camp-responsive element-binding protein phosphorylation | 0.376180503  |
| camp-responsive genes                                   |              |
| camp-responsive luciferase reporter plasmid             | 0.117418035  |
| camp-responsive promoter                                | 0.183589626  |
| camp-responsive promoter elements                       | 0.15822255   |
| camp-responsive promoters                               | 0.239060416  |
| camp-responsive region                                  | 0.072200623  |
| camp-responsive signaling complex                       | 0.062020426  |
| candidate caspase cleavage site                         | 0.307501562  |
| canonical initiator elements                            | 0.05884172   |
| capsular fibroblasts                                    | 0.329349157  |
| carbohydrate response element-binding protein           | 0.215539183  |
| carboxy-terminal activation helix                       | 0.397403887  |
| carboxy-terminal phosphorylation sites                  | 0.329401881  |
| cardiac myocyte apoptosis                               | 0.325178839  |
| cardiac remodeling                                      | 0.153753803  |
| cardiomyocyte apoptosis                                 | 0.320751932  |
| cardiovascular remodeling                               | 0.190399652  |
| carnitine acetyltransferase                             | 0.34179356   |
| cartilage collagen                                      | 0.372135737  |
| cartilage collagen ii                                   | 0.372926683  |
| cartilage-specific collagen                             | 0.37306067   |
| cartilaginous templates                                 | 0.335454671  |
| caspase                                                 | 0.314343755  |
| caspase activation                                      | 0.393165646  |
| caspase activation                                      | 0.393165646  |
| caspase activation program                              | 0.392539074  |
| caspase activation program                              | 0.392539074  |



|                                              |              |
|----------------------------------------------|--------------|
| caspase activity                             | 0.343183493  |
| caspase cascade                              | 0.318236297  |
| caspase cascade amplification                | 0.318951641  |
| caspase cleavage                             | 0.311053765  |
| caspase cleavage fragments                   | 0.311855987  |
| caspase cleavage site                        | 0.316816617  |
| caspase consensus sequence                   | 0.310304589  |
| caspase consensus site                       | 0.325882615  |
| caspase independent                          | 0.312457858  |
| caspase inhibition                           | 0.350710771  |
| caspase inhibition                           | 0.350710771  |
| caspase inhibitor                            | 0.360617495  |
| caspase inhibitor analysis                   | 0.353455905  |
| caspase inhibitors                           | 0.341330158  |
| caspase pathway                              | 0.304583771  |
| caspase processing                           | 0.304270058  |
| caspase production                           | 0.31141313   |
| caspase recruitment domain                   | 0.348794596  |
| caspase sequences                            | 0.303984639  |
| caspase substrate                            | 0.32272679   |
| caspase substrates                           | 0.312335193  |
| caspase zymogen                              | 0.311407911  |
| caspases                                     | 0.32127955   |
| catalytic activation                         | 0.362090611  |
| catalytic phosphorylation site               | 0.328626564  |
| caucasian septic shock patients              |              |
| ccaat                                        | 0.32315294   |
| ccaat box                                    | 0.051865676  |
| ccaat box consensus                          | 0.086360551  |
| ccaat box consensus sequence                 | 0.02542766   |
| ccaat boxes                                  | 0.244014539  |
| ccaat displacement protein                   | 0.160254719  |
| ccaat element                                | 0.156669574  |
| ccaat elements                               | 0.097788641  |
| ccaat enhancer-binding protein-binding sites |              |
| ccaat enhancer-binding protein-binding sites | 0.237496041  |
| ccaat motif                                  | 0.117627318  |
| ccaat sequence                               | 0.055874576  |
| ccaat sequences                              | 0.027039545  |
| cdna templates                               | -0.017361055 |
| cell intrinsic                               | 0.064374693  |

|                                                    |             |
|----------------------------------------------------|-------------|
| cell-specific inhibition                           | 0.235380489 |
| cellular activation                                | 0.371007365 |
| cellular apoptosis                                 | 0.326452322 |
| cellular apoptosis machinery                       | 0.326044086 |
| cellular apoptotic response                        | 0.306404939 |
| cellular cofactors binding                         | 0.219808956 |
| cellular heat production                           | 0.328480021 |
| cellular transforming genes                        | 0.185878028 |
| central acetyltransferase domain                   | 0.376097967 |
| central collagen domain                            | 0.380989581 |
| central tendon                                     | 0.226277022 |
| cervical carcinoma cells inhibited tumor growth    | 0.060056106 |
| cgmp-dependent phosphorylation                     | 0.329741348 |
| chaperone                                          | 0.30843813  |
| chaperone activities                               | 0.317910081 |
| chaperone activity                                 | 0.362098378 |
| chaperone characteristics                          | 0.298630626 |
| chaperone cofactors                                | 0.333277768 |
| chaperone cofactors                                | 0.333277768 |
| chaperone complexes                                | 0.278599317 |
| chaperone diseases                                 | 0.300102696 |
| chaperone efficiency                               | 0.296386924 |
| chaperone folding environment                      | 0.304858092 |
| chaperone levels                                   | 0.25088189  |
| chaperone protein                                  | 0.288401891 |
| chaperone protein substrates                       | 0.276615906 |
| chaperone system                                   | 0.280764874 |
| chemical activation                                | 0.364251993 |
| chemical chaperone                                 | 0.310988865 |
| chemical hdac inhibitors                           | 0.443055711 |
| chemical inhibition                                | 0.294602085 |
| chemical templates                                 | 0.276665542 |
| chicken collagen                                   | 0.370636294 |
| chicken histones                                   | 0.252015721 |
| chicken type ii procollagen                        | 0.303640056 |
| chimeric transforming oncogenes                    | 0.243067691 |
| chinese hamster fibroblasts                        | 0.304624926 |
| chloramphenicol acetyltransferase                  | 0.430091231 |
| chloramphenicol acetyltransferase activity         | 0.443921233 |
| chloramphenicol acetyltransferase assay            | 0.446093554 |
| chloramphenicol acetyltransferase reporter fusions | 0.393094256 |

|                                    |             |
|------------------------------------|-------------|
| chloromethyl                       | 0.329889141 |
| choline acetyltransferase          | 0.38505022  |
| choline acetyltransferase activity | 0.406661047 |
| choline acetyltransferase mrna     |             |
| chondrocyte-specific               | 0.287423189 |
| chondrocyte-specific activation    | 0.378843192 |
| chondrocyte-specific activation    | 0.378843192 |
| chondrocyte-specific enhancers     | 0.069238304 |
| chondrocyte-specific expression    | 0.071414233 |
| chorionic villus fibroblasts       | 0.300303013 |
| chromatin acetylation              | 0.406063046 |
| chromatin activation               | 0.396888343 |
| chromatin remodeling               | 0.285388938 |
| chromatin remodeling activities    | 0.287380746 |
| chromatin remodeling complexes     | 0.251071756 |
| chromatin remodeling enzymes       | 0.232927283 |
| chromatin remodeling factors       | 0.268663435 |
| chromatin remodeling protein       | 0.281334331 |
| chromatin remodeling proteins      | 0.237304153 |
| chromatin templates                | 0.222649689 |
| chromatin templates results        | 0.207816693 |
| chromosome remodeling              | 0.01697407  |
| chronic inhibition                 | 0.252721011 |
| chronic initiator                  | 0.179987059 |
| c-jun transactivation domain       | 0.246661853 |
| class ii hdac                      | 0.093652842 |
| class ii hdac activity             | 0.161165323 |
| class ii hdac deficiency           |             |
| class ii hdac kinase               | 0.206994826 |
| class ii hdac phosphorylation      | 0.332195679 |
| class ii hdac phosphorylation      | 0.332195679 |
| class ii histone deacetylases      | 0.294086772 |
| classic activation                 | 0.361941106 |
| c-myb                              | 0.30059469  |
| c-myb oncogene                     |             |
| coactivator                        | 0.420384339 |
| coactivator access                 | 0.419663247 |
| coactivator activity               | 0.434136073 |
| coactivator binding                | 0.412087714 |
| coactivator binding domain         | 0.389861167 |
| coactivator complexes              | 0.40277616  |

|                                  |             |
|----------------------------------|-------------|
| coactivator motif                | 0.407938605 |
| coactivator peptides             | 0.393752859 |
| coactivator protein              | 0.427830814 |
| coactivator proteins             | 0.399423885 |
| coactivator recognition groove   | 0.40405431  |
| coactivator recruitment          | 0.410866589 |
| coactivator release              | 0.413882095 |
| coactivators                     | 0.432614301 |
| cofactors                        | 0.347400967 |
| cognate histone modifications    | 0.344016981 |
| col                              | 0.320400649 |
| cold shock domain                | 0.331875536 |
| collagen                         | 0.374138699 |
| collagen assembly factor decorin | 0.387632326 |
| collagen assembly factor decorin | 0.387632326 |
| collagen binding                 | 0.395782953 |
| collagen binding reaction        | 0.393056147 |
| collagen bundles                 | 0.369164177 |
| collagen chains                  | 0.367830962 |
| collagen content                 | 0.373214898 |
| collagen crosslinking            | 0.37236796  |
| collagen c-terminal domain       | 0.384540736 |
| collagen deposition              | 0.374259034 |
| collagen digestion               | 0.373674208 |
| collagen domain                  | 0.384120698 |
| collagen domains                 | 0.373425199 |
| collagen fiber assembly          | 0.36944035  |
| collagen fibers                  | 0.371427081 |
| collagen fibril                  | 0.371826318 |
| collagen fibril architecture     | 0.369796767 |
| collagen fibril arrangement      | 0.370674996 |
| collagen fibril diameters        | 0.37163205  |
| collagen folding                 | 0.388172156 |
| collagen gel                     | 0.378719961 |
| collagen gel matrix              | 0.416545057 |
| collagen glycation               | 0.373329231 |
| collagen helical modification    | 0.378951759 |
| collagen helix                   | 0.376620311 |
| collagen helix formation         | 0.369573908 |
| collagen iib                     | 0.37070256  |
| collagen iiii                    | 0.369393099 |

|                                         |             |
|-----------------------------------------|-------------|
| collagen iii anomaly                    | 0.369986366 |
| collagen iii expression                 | 0.368858924 |
| collagen ix                             | 0.373676939 |
| collagen lattices                       | 0.374288341 |
| collagen maps                           | 0.369817372 |
| collagen matrices                       | 0.375313205 |
| collagen matrix                         | 0.413185363 |
| collagen melting temperature            | 0.37250423  |
| collagen motif                          | 0.372576953 |
| collagen polypeptides                   | 0.373389984 |
| collagen production                     | 0.370497845 |
| collagen prolyl                         | 0.377282426 |
| collagen promoter                       | 0.400180689 |
| collagen protein                        | 0.388741747 |
| collagen proteins                       | 0.371319496 |
| collagen stimulation                    | 0.38609482  |
| collagen studies                        | 0.371342463 |
| collagen synthesis                      | 0.372325015 |
| collagen triple helices                 | 0.371374129 |
| collagen triple helix                   | 0.372878039 |
| collagen triple helix stability         | 0.371298995 |
| collagen types                          | 0.37203557  |
| collagen types ii                       | 0.372071049 |
| collagen types ix                       | 0.371718922 |
| collagen xi                             | 0.371916335 |
| collagen xiv                            | 0.372360162 |
| collagen xv                             | 0.369941425 |
| collagen xviii                          | 0.367658962 |
| collagenase                             | 0.295674263 |
| collagenase analysis                    | 0.231625214 |
| collagenase digestion                   | 0.304874142 |
| collagenase inhibition                  | 0.387002425 |
| collagenase inhibition                  | 0.387002425 |
| collagenase inhibitor                   | 0.321801507 |
| collagens                               | 0.336914304 |
| collagens inhibited degranulation       | 0.400636283 |
| collagens inhibited degranulation       | 0.400636283 |
| collateral remodeling                   | 0.282508975 |
| colon cancer cells inhibited expression | 0.063233592 |
| combined inhibition                     | 0.256576148 |
| common smad                             | 0.374665839 |

|                                              |             |
|----------------------------------------------|-------------|
| common smad protein                          | 0.302842471 |
| compensatory alternative apoptotic pathways  | 0.264947977 |
| competitive inhibition                       | 0.286411662 |
| competitive inhibition mechanism             | 0.276231955 |
| complete inhibition                          | 0.262754324 |
| complete unfolding                           | 0.044759546 |
| concomitant activation                       | 0.361094962 |
| concomitant inhibition                       | 0.280892079 |
| concomitant phosphorylation                  | 0.329194612 |
| concurrent activation                        | 0.357988418 |
| conformational activation                    | 0.394206403 |
| connective                                   | 0.368049093 |
| connective tissue                            | 0.149159154 |
| connective tissue abnormalities              | 0.076226418 |
| connective tissue bed                        | 0.145714363 |
| connective tissue biopsies                   | 0.160247408 |
| connective tissue cells                      | 0.03904405  |
| connective tissue components                 | 0.112162843 |
| connective tissue defects                    | 0.013977811 |
| connective tissue development                | 0.045039811 |
| connective tissue diseases                   | 0.132043282 |
| connective tissue disorders                  | 0.096478094 |
| connective tissue elements                   | 0.12245687  |
| connective tissue glycoprotein               | 0.064417144 |
| connective tissue growth factor              | 0.121116218 |
| connective tissue manifestations             | 0.133816789 |
| connective tissue matrices                   | 0.173277052 |
| connective tissue metabolism                 | 0.07277148  |
| connective tissue patterning                 | 0.045582868 |
| connective tissue sheath                     | 0.12546997  |
| connective tissue sheet                      | 0.154257476 |
| connective tissue sites                      | 0.161435171 |
| connective tissues                           | 0.14904827  |
| connective tissue-type mast cells            | 0.011532545 |
| consensus caspase cleavage recognition motif | 0.299459299 |
| consensus ccaat boxes                        | 0.226741561 |
| consensus initiator sequences                | 0.089036002 |
| consensus phosphorylation sites              | 0.327840919 |
| conserved acetyltransferase activity         | 0.386837626 |
| conserved aspirin acetylation site           | 0.408237158 |
| constitutive phosphorylation                 | 0.325819821 |

|                                                 |              |
|-------------------------------------------------|--------------|
| contact inhibition                              | 0.280176469  |
| contact inhibition signal                       | 0.230268277  |
| control adenovirus                              | 0.262673056  |
| control adenovirus vector                       | 0.26911987   |
| control fibroblasts                             | 0.292936256  |
| controls tgf-beta activation                    | 0.368286212  |
| cooperative activation                          | 0.36701485   |
| cooperative cofactors                           | 0.33668377   |
| cooperative transactivation                     | 0.413812996  |
| coordinating apoptosis                          | 0.313868165  |
| copper chaperone                                | 0.178816389  |
| core apoptotic pathway                          | 0.273701761  |
| core histone                                    | 0.354239571  |
| core histone acetylation                        | 0.414441471  |
| core histone acetylation                        | 0.414441471  |
| core histone mixtures                           | 0.353302751  |
| core histones                                   | 0.306441613  |
| corneal fibroblasts                             | 0.292831528  |
| corneal stromal fibroblasts                     | 0.2475993    |
| couples apoptotic signals                       | 0.296640322  |
| creb-binding                                    | 0.459747978  |
| creb-binding domain                             |              |
| creb-binding protein                            |              |
| creb-binding protein histone acetyltransferase  |              |
| creb-binding protein histone acetyltransferase  | 0.416106378  |
| creb-binding protein histone acetyltransferase  | 0.416106378  |
| creb-binding regions                            |              |
| creb-binding sites                              |              |
| critical acetylation sites                      | 0.429793639  |
| critical apoptotic cell                         | 0.225760044  |
| critical caspase substrate                      | 0.322703565  |
| critical coactivator                            | 0.415201143  |
| critical intrinsic dopamine neuron determinants | -0.026231638 |
| critical phosphorylation site                   | 0.331750312  |
| critical positive coactivator                   | 0.415522245  |
| critical transactivator                         | 0.220226716  |
| cryptic site activation                         | 0.37016447   |
| c-terminal acetyltransferase domain             | 0.344728565  |
| c-terminal apoptotic domain                     | 0.307200613  |
| c-terminal coactivator interaction domain       | 0.367828205  |
| c-terminal hdac domain                          | 0.238367972  |

|                                                   |             |
|---------------------------------------------------|-------------|
| c-terminal phosphorylation site                   | 0.330888195 |
| c-terminal transactivation                        | 0.378557449 |
| c-terminal transactivation domain                 | 0.337488058 |
| c-terminal transactivation inhibitory domain      | 0.318381166 |
| cultured chicken fibroblasts                      | 0.319870698 |
| cultured chondrocyte-specific expression          | 0.123680884 |
| cultured dermal fibroblasts                       | 0.38371691  |
| cultured dermal fibroblasts                       | 0.38371691  |
| cultured dermal sheath cells                      | 0.065607248 |
| cultured fibroblasts                              | 0.355563847 |
| cultured human dermal fibroblasts                 | 0.322199282 |
| cultured human dermal fibroblasts                 | 0.322199282 |
| cultured human dermal lymphatic endothelial cells | 0.095958029 |
| cultured human diploid fibroblasts                | 0.279612149 |
| cultured human fibroblasts                        | 0.288341439 |
| cultured patient fibroblasts                      | 0.345594327 |
| cultured rodent fibroblasts                       | 0.329783374 |
| cultured skin fibroblasts                         | 0.244573403 |
| cultured tendon cells                             | 0.063412361 |
| cyanogen bromide                                  | 0.283804033 |
| cyanogen bromide fragments                        | 0.192635549 |
| cyanogen bromide treatment                        | 0.259497477 |
| cyclic amp-dependent inhibition                   | 0.252429293 |
| cyclic phosphorylation                            | 0.336102591 |
| cysteine-rich protein-binding domains             |             |
| cytokine-induced activation                       | 0.358302274 |
| cytokine-induced phosphorylation                  | 0.330642857 |
| cytoskeletal remodeling                           | 0.189451751 |
| cytoskeletal remodeling mechanisms                | 0.18150222  |
| cytosolic chaperone                               | 0.287028873 |
| cytosolic iron chaperone                          |             |
| cytosolic lipid chaperone                         | 0.21940067  |
| cytosolic phosphorylation                         | 0.334809363 |
| deacetylase                                       | 0.37677819  |
| deacetylase activity                              | 0.397786653 |
| deacetylase activity accounts                     | 0.392074687 |
| deacetylase complexes                             | 0.316177763 |
| deacetylases                                      | 0.323444767 |
| death receptor-mediated apoptosis                 | 0.311317151 |
| decidual fibroblasts                              | 0.319882644 |
| decorin                                           | 0.323069173 |



|                                                    |              |
|----------------------------------------------------|--------------|
| decreased activation                               | 0.363984771  |
| decreased apoptosis                                | 0.319611776  |
| decreased apoptotic response                       | 0.292231617  |
| decreased caspase activity                         | 0.351595414  |
| decreased fracture risk                            | 0.058418996  |
| decreased histone acetylation                      | 0.417741325  |
| decreased histone acetylation                      | 0.417741325  |
| decreased inhibition                               | 0.249533668  |
| decreased interstitial collagen deposition         | 0.379950265  |
| decreased phosphorylation                          | 0.3351596    |
| defective histone acetylation                      | 0.399241468  |
| defective histone acetylation                      | 0.399241468  |
| defective transactivation                          | 0.368718004  |
| deficient decorin expression                       |              |
| degenerative tendon                                | 0.248739333  |
| dendritic cell intrinsic defect                    | -0.06525168  |
| dense connective tissue                            | 0.131040099  |
| deprivation-induced apoptosis                      | 0.314669047  |
| dermal                                             | 0.332464988  |
| dermal area                                        | 0.303269066  |
| dermal biopsies                                    | 0.28567316   |
| dermal blood vessels                               | 0.191741343  |
| dermal capillaries                                 | 0.325399621  |
| dermal cells                                       | 0.035884307  |
| dermal collagen fibrils                            | 0.370467902  |
| dermal collagen fibrils                            | 0.370467902  |
| dermal collagens                                   | 0.368281228  |
| dermal collagens                                   | 0.368281228  |
| dermal cysts                                       | 0.228650162  |
| dermal dendritic cells                             | -0.027864222 |
| dermal eccrine sweat glands                        | 0.087348412  |
| dermal extracellular matrix                        | 0.290571552  |
| dermal fibroblast cdna libraries                   | -0.020608782 |
| dermal fibroblasts                                 | 0.359781998  |
| dermal fibroblasts                                 | 0.359781998  |
| dermal inflammation                                | 0.061094443  |
| dermal layers                                      | 0.245123659  |
| dermal leprosy lesions                             | 0.047216694  |
| dermal mast cells                                  | 0.019358371  |
| dermal matrix                                      | 0.295599092  |
| dermal microvascular endothelial cell cdna library | 0.076723841  |

|                                              |              |
|----------------------------------------------|--------------|
| dermal mosaicism                             | 0.289640009  |
| dermal neovascularization                    | 0.274001694  |
| dermal papilla                               | 0.261991497  |
| dermal papilla cell cdna library             | 0.020526117  |
| dermal papillae                              | 0.250684845  |
| dermal papillae cells                        | 0.029519272  |
| dermal papillae maturation                   | 0.111712137  |
| dermal ridge pattern                         | 0.149090723  |
| dermal ridges                                | 0.336547165  |
| dermal sinus                                 | 0.23388436   |
| dermal substrates                            | 0.238761374  |
| dermal tissue                                | 0.157521997  |
| dermal wounds                                | 0.357392847  |
| descending inhibition                        | 0.285760993  |
| developing sclera                            |              |
| dids inhibition                              | 0.292086064  |
| differential inhibition                      | 0.245731553  |
| differentiated fibroblasts                   | 0.30559735   |
| diffuse collagen deposition                  | 0.376520977  |
| dihydrolipoamide acetyltransferase           | 0.423736246  |
| dimethyl histone                             | 0.34669255   |
| diminished apoptotic cell death              | 0.240994588  |
| diminished histone                           | 0.349773256  |
| diploid fibroblasts                          | 0.313060756  |
| diploid human fibroblasts                    | 0.258315008  |
| direct coactivator target                    | 0.39996829   |
| direct inhibition                            | 0.282654805  |
| direct phosphorylation                       | 0.329600915  |
| disordered collagen fibril orientation       | 0.370504998  |
| distal ccaat box                             |              |
| distal fibroblasts                           | 0.310653476  |
| divergent n-terminal coactivator domain      | 0.388622501  |
| divergent receptor-regulated smad downstream | 0.430623481  |
| dna templates                                | -0.104660621 |
| dna-binding transactivator                   | 0.112809911  |
| dnase activation                             | 0.362863973  |
| dominant inhibition                          | 0.259858937  |
| dominant transactivator                      | 0.186682788  |
| downstream activation                        | 0.362293632  |
| downstream caspase activation                | 0.398189977  |
| downstream caspase activation                | 0.398189977  |

|                                |             |
|--------------------------------|-------------|
| downstream caspases            | 0.343338662 |
| downstream effector caspases   | 0.298029137 |
| downstream initiator           | 0.348829133 |
| downstream remodeling          | 0.361536101 |
| drug-induced apoptosis         | 0.319303635 |
| drug-induced inhibition        | 0.289386277 |
| dual inhibition                | 0.241890405 |
| dual phosphorylation           | 0.322397508 |
| dynamic phosphorylation        | 0.326758152 |
| dynamic phosphorylation mark   | 0.327377308 |
| dynamic remodeling             | 0.288425938 |
| early apoptotic events         | 0.278592241 |
| early passage fibroblasts      | 0.291150673 |
| early remodeling               | 0.245447664 |
| early remodeling process       | 0.218047878 |
| early-onset bone fractures     | 0.065759782 |
| ebv protein-binding sequence   |             |
| ec collagen                    | 0.373835548 |
| effector caspase activation    | 0.372183619 |
| effector caspase activation    | 0.372183619 |
| effector caspase activity      | 0.320759086 |
| effector caspase inhibition    | 0.329233973 |
| effector caspase inhibition    | 0.329233973 |
| effector caspases              |             |
| ehlers-danlos                  | 0.315556421 |
| ehlers-danlos syndrome         |             |
| ehlers-danlos syndrome ii      | 0.033287619 |
| ehlers-danlos syndrome type    | 0.104978639 |
| ehlers-danlos syndrome type ii | 0.108106442 |
| ehlers-danlos syndrome type vi | 0.113942769 |
| ehlers-danlos variant          | 0.153406644 |
| elastase inhibition            | 0.24393592  |
| electric activation            | 0.361059956 |
| electric foot shock            | 0.313908879 |
| electric shock                 | 0.316705666 |
| electroconvulsive shock        | 0.316719003 |
| element-binding                | 0.355503705 |
| elevated apoptosis             | 0.309724097 |
| elevated histone               | 0.34349025  |
| elevated phosphorylation       | 0.32389167  |
| embryo fibroblasts             | 0.255799068 |

|                                              |             |
|----------------------------------------------|-------------|
| embryonic blood vascular remodeling          | 0.109282444 |
| empty adenovirus                             | 0.416225472 |
| end-labeling                                 | 0.329684584 |
| endogenous beta-amyloid chaperone            | 0.253992805 |
| endogenous mouse type ii procollagen         |             |
| endogenous phosphorylation                   | 0.324576433 |
| endometrial fibroblasts                      | 0.303567455 |
| endoplasmic reticulum chaperone calreticulin | 0.25379896  |
| endoplasmic reticulum chaperone protein      | 0.246798633 |
| endothelial apoptosis                        | 0.311308889 |
| endothelial remodeling                       | 0.136182729 |
| endotoxic shock                              | 0.311460514 |
| enhanced acetylation                         | 0.437530547 |
| enhanced apoptosis                           | 0.322169564 |
| enhanced basal apoptotic activity            | 0.364447381 |
| enhanced collagen deposition                 | 0.382398453 |
| enhanced dermal fibroblast infiltration      | 0.003444996 |
| enhanced myocyte apoptosis                   | 0.34002848  |
| enhanced osteogenesis                        | 0.374118751 |
| enhanced phosphorylation                     | 0.335623572 |
| enhanced smad signaling                      | 0.154615402 |
| enhanced transactivation                     | 0.415297541 |
| enterocyte apoptosis                         | 0.3146722   |
| environmental cofactors                      | 0.164149026 |
| eosinophil apoptosis                         | 0.315806094 |
| epidermal remodeling                         | 0.1732025   |
| epstein-barr virus transforming protein      | 0.174494777 |
| erythropoietin receptor-mediated activation  | 0.361025818 |
| essential coactivator                        | 0.399618716 |
| essential coactivators                       | 0.398748776 |
| essential cofactors                          | 0.020606704 |
| essential intrinsic determinant              | 0.036979183 |
| estrogen receptor-alpha coactivator          |             |
| ethidium bromide                             | 0.214490384 |
| excess apoptosis                             | 0.310653958 |
| excessive activation                         | 0.359862489 |
| excessive apoptosis                          | 0.31410673  |
| excessive apoptotic cell death               | 0.24206096  |
| experimental inhibition                      | 0.262639075 |
| expressed collagenase                        | 0.122388692 |
| expressed decorin                            | 0.049051712 |

|                                          |             |
|------------------------------------------|-------------|
| extended histone                         | 0.345509276 |
| extensor tendons                         | 0.339516053 |
| extracellular collagen                   | 0.385112198 |
| extracellular matrix collagen fibrils    | 0.406512467 |
| extracellular matrix collagens           | 0.321310871 |
| extracellular matrix remodeling          | 0.287360493 |
| extraskkeletal connective tissues        | 0.153420347 |
| extremely severe osteogenesis imperfecta | 0.329403806 |
| extremely severe osteogenesis imperfecta | 0.329403806 |
| factor-beta                              | 0.299759662 |
| fanconi anemia fibroblasts               | 0.254450015 |
| feedback inhibition                      | 0.23292782  |
| fetal fibroblasts                        | 0.255046923 |
| fibrillar collagen                       | 0.369083728 |
| fibrillar collagens                      | 0.306538599 |
| fibroblast collagenase                   | 0.009093509 |
| fibroblasts                              | 0.32538294  |
| fluoride inhibition                      | 0.294023183 |
| focal dermal hypoplasia                  | 0.084621208 |
| foot fibroblasts                         | 0.321317435 |
| force activation                         | 0.365636102 |
| forced activation                        | 0.362271492 |
| foreskin fibroblasts                     | 0.321357337 |
| fracture                                 | 0.288873187 |
| fracture callus                          | 0.253893285 |
| fracture callus formation                | 0.150993284 |
| fracture energy                          | 0.308526191 |
| fracture healing                         | 0.318830432 |
| fracture history                         | 0.268368662 |
| fracture repair                          |             |
| fracture risk                            | 0.037472635 |
| fracture site                            | 0.294779897 |
| fracture wound                           | 0.331831543 |
| fractures                                | 0.294068602 |
| free core histones                       | 0.297271854 |
| free histone                             | 0.344683878 |
| free histones                            | 0.340662871 |
| free radical initiator                   | 0.252088338 |
| freeze fracture                          | 0.290471575 |
| full activation                          | 0.359696395 |
| full collagen vi protein                 | 0.378272457 |

|                                          |             |
|------------------------------------------|-------------|
| full t-lymphocyte activation             | 0.360462615 |
| functional acetyltransferase             | 0.361884058 |
| functional caspase cascades              | 0.296799404 |
| functional transactivation               | 0.34593434  |
| gabp                                     | 0.30408108  |
| gabp complex                             | 0.034163307 |
| gabp transcription factor complex        | 0.141619418 |
| gastric intrinsic factor                 | 0.081115841 |
| general apoptotic pathway                | 0.255327807 |
| general caspase                          | 0.313598    |
| general coactivator                      | 0.417439053 |
| general connective tissue weakness       | 0.139547913 |
| general inhibition                       | 0.289384337 |
| gene-specific phosphorylation            | 0.329886601 |
| gingival fibroblasts                     | 0.309478942 |
| global coactivator                       | 0.42036217  |
| global histone acetylation               | 0.408992041 |
| global histone acetylation               | 0.408992041 |
| global histone acetylation levels        | 0.402970315 |
| global histone acetylation levels        | 0.402970315 |
| glomerular apoptosis                     | 0.312615923 |
| glomerular apoptotic bodies              | 0.273836793 |
| glucocorticoid activation                | 0.379205728 |
| glucocorticoid-induced apoptosis         | 0.308836354 |
| glucokinase inhibition                   | 0.261301047 |
| glycinergic inhibition                   | 0.260989329 |
| goat inhibition                          | 0.29152941  |
| gorilla fibroblasts                      | 0.320253452 |
| gram-negative septic shock               | 0.288884583 |
| gram-negative shock                      | 0.296673232 |
| greater apoptotic response               | 0.277715641 |
| greater inhibition                       | 0.26972039  |
| growth factor-beta                       | 0.211901082 |
| growth factor-beta expression            | 0.19367329  |
| growth factor-beta families              | 0.20292197  |
| growth factor-beta mrna                  | 0.135414483 |
| growth factor-beta signaling             | 0.155582203 |
| growth factor-beta superfamily signaling | 0.139321772 |
| growth factor-beta treatment             | 0.236002581 |
| hair follicle dermal sheath              |             |
| hamster fibroblasts                      | 0.305646249 |

|                               |             |
|-------------------------------|-------------|
| harmful heat                  | 0.315616711 |
| hcv entry cofactors           | 0.121299839 |
| hdac                          | 0.392265499 |
| hdac activity                 | 0.398734188 |
| hdac binding                  | 0.283325601 |
| hdac binding domain           | 0.253714335 |
| hdac catalytic activity       | 0.356807041 |
| hdac domain                   | 0.299870907 |
| hdac enzymatic activity       | 0.346661997 |
| hdac expression               | 0.204370335 |
| hdac inhibition               | 0.45321484  |
| hdac inhibition               | 0.45321484  |
| hdac inhibitor                | 0.398266676 |
| hdac inhibitors               | 0.438209585 |
| heart remodeling              | 0.215612606 |
| heat                          | 0.315117297 |
| heat activation               | 0.479689454 |
| heat activation               | 0.479689454 |
| heat avoidance                | 0.310603746 |
| heat denaturation             | 0.321254997 |
| heat exposure                 | 0.290966226 |
| heat loss                     | 0.268371742 |
| heat nociception              | 0.298823927 |
| heat production               | 0.302410466 |
| heat repeat                   | 0.287832194 |
| heat repeat clusters          | 0.275926666 |
| heat repeat segments          | 0.271401292 |
| heat repeats                  | 0.275982584 |
| heat sensitivity              | 0.284343443 |
| heat shock                    | 0.315806368 |
| heat shock                    | 0.315806368 |
| heat shock cognate protein    | 0.310078805 |
| heat shock cognate protein    | 0.310078805 |
| heat shock protein            | 0.311370149 |
| heat shock protein            | 0.311370149 |
| heat shock protein expression | 0.29930795  |
| heat shock protein expression | 0.29930795  |
| heat shock proteins           | 0.294888562 |
| heat shock proteins           | 0.294888562 |
| heat shock response           | 0.309603914 |
| heat shock response           | 0.309603914 |

|                                                              |             |
|--------------------------------------------------------------|-------------|
| heat shock treatment                                         | 0.327185647 |
| heat shock treatment                                         | 0.327185647 |
| heat stability                                               | 0.314546167 |
| heat stable                                                  | 0.307736507 |
| heat stimulus                                                | 0.314955519 |
| heat stress                                                  | 0.275665417 |
| heat treatment                                               | 0.335140437 |
| heat-shock                                                   | 0.326904617 |
| heat-shock chaperone components                              | 0.321232825 |
| heat-shock chaperone components                              | 0.321232825 |
| heat-shock cognate protein                                   | 0.321681221 |
| heat-shock cognate proteins                                  | 0.306105774 |
| heat-shock domains                                           | 0.328220435 |
| heat-shock element                                           | 0.328903382 |
| heat-shock genes                                             | 0.286354093 |
| heat-shock loci                                              | 0.298199249 |
| heat-shock promoter                                          | 0.354901812 |
| heat-shock protein                                           | 0.322967523 |
| heat-shock protein genes                                     | 0.28225856  |
| heat-shock proteins                                          | 0.307204106 |
| heat-shock response                                          | 0.322490903 |
| heat-shock response element                                  | 0.323609764 |
| heat-shock response genes                                    |             |
| heat-shock transcription factors                             | 0.346113354 |
| heat-shock treatment                                         | 0.337858699 |
| hela cell native core histones                               | 0.190966709 |
| hela cells inhibited cell cycle progression                  | 0.036452124 |
| hela cells inhibited cell proliferation                      | 0.051249385 |
| hemorrhagic shock                                            | 0.310761688 |
| hepatocellular apoptosis                                     | 0.312863995 |
| hepatocyte apoptosis                                         | 0.316393206 |
| heritable connective tissue disorder                         | 0.075284081 |
| herpes simplex virus transactivator                          |             |
| heteroduplexes                                               | 0.289071227 |
| high heat                                                    | 0.306398759 |
| high intrinsic ability                                       | 0.220622896 |
| high transactivation ability                                 | 0.404176959 |
| high transforming activity                                   | 0.343927428 |
| highly conserved nucleosomal protein                         | 0.080567553 |
| highly conserved transforming growth factor-beta superfamily | 0.212971889 |
| highly conserved transforming growth factor-beta superfamily | 0.212971889 |



|                                      |             |
|--------------------------------------|-------------|
| hip fracture                         | 0.283424142 |
| histidine phosphorylation            | 0.322110899 |
| histone                              | 0.34642055  |
| histone acetyl transferase activity  | 0.362019357 |
| histone acetyl transferase activity  | 0.362019357 |
| histone acetylase                    | 0.357761226 |
| histone acetylase                    | 0.357761226 |
| histone acetylase complex            |             |
| histone acetylase complex            |             |
| histone acetylation                  | 0.409975217 |
| histone acetylation                  | 0.409975217 |
| histone acetylation defects          | 0.394874632 |
| histone acetylation defects          | 0.394874632 |
| histone acetylation levels           | 0.404042834 |
| histone acetylation levels           | 0.404042834 |
| histone acetylation patterns         | 0.404356094 |
| histone acetylation patterns         | 0.404356094 |
| histone acetylation profiles         | 0.40807761  |
| histone acetylation profiles         | 0.40807761  |
| histone acetyltransferase            | 0.385356126 |
| histone acetyltransferase            | 0.385356126 |
| histone acetyltransferase activities | 0.386122455 |
| histone acetyltransferase activities | 0.386122455 |
| histone acetyltransferase activity   | 0.398720948 |
| histone acetyltransferase activity   | 0.398720948 |
| histone acetyltransferase complex    | 0.369146225 |
| histone acetyltransferase complex    | 0.369146225 |
| histone acetyltransferase complexes  | 0.370830518 |
| histone acetyltransferase complexes  | 0.370830518 |
| histone acetyltransferase domain     | 0.381378417 |
| histone acetyltransferase domain     | 0.381378417 |
| histone acetyltransferase domains    | 0.377707384 |
| histone acetyltransferase domains    | 0.377707384 |
| histone acetyltransferase repeat     | 0.374604497 |
| histone acetyltransferase repeat     | 0.374604497 |
| histone acetyltransferases           | 0.369707986 |
| histone acetyltransferases           | 0.369707986 |
| histone binding                      | 0.3524592   |
| histone biotinylation                | 0.348452924 |
| histone chaperone                    | 0.447555801 |
| histone chaperone                    | 0.447555801 |

|                                |             |
|--------------------------------|-------------|
| histone chaperone activity     | 0.461537029 |
| histone chaperone activity     | 0.461537029 |
| histone chaperones             | 0.406561988 |
| histone code                   | 0.344687577 |
| histone code mediator protein  | 0.351181068 |
| histone deacetylase            | 0.367181466 |
| histone deacetylase            | 0.367181466 |
| histone deacetylase activity   | 0.382040312 |
| histone deacetylase activity   | 0.382040312 |
| histone deacetylase binding    | 0.370831429 |
| histone deacetylase binding    | 0.370831429 |
| histone deacetylase complex    | 0.349984567 |
| histone deacetylase complex    | 0.349984567 |
| histone deacetylase complexes  | 0.350985418 |
| histone deacetylase complexes  | 0.350985418 |
| histone deacetylase domain     | 0.363701169 |
| histone deacetylase domain     | 0.363701169 |
| histone deacetylase inhibition | 0.407820443 |
| histone deacetylase inhibition | 0.407820443 |
| histone deacetylase inhibition | 0.407820443 |
| histone deacetylase inhibitor  | 0.424165674 |
| histone deacetylase inhibitor  | 0.424165674 |
| histone deacetylase inhibitors | 0.395420316 |
| histone deacetylase inhibitors | 0.395420316 |
| histone deacetylases           | 0.349664731 |
| histone deacetylases           | 0.349664731 |
| histone demethylases           | 0.340753676 |
| histone displacement           | 0.344906883 |
| histone domain                 | 0.343384143 |
| histone exchange               | 0.343003711 |
| histone fold                   | 0.347228028 |
| histone fold domain            | 0.343024365 |
| histone fold motif             | 0.3378387   |
| histone mark                   | 0.343956087 |
| histone markers                | 0.339460245 |
| histone marks                  | 0.343404301 |
| histone methylase activity     | 0.365690421 |
| histone modification           | 0.339245369 |
| histone modifications          | 0.341072361 |
| histone modifiers              | 0.33983961  |
| histone nomenclature           | 0.345437063 |

|                                                   |              |
|---------------------------------------------------|--------------|
| histone n-terminal tails                          | 0.34133511   |
| histone octamer                                   | 0.344186505  |
| histone polypeptides                              | 0.345054021  |
| histone protein production                        | 0.345816806  |
| histone replacement                               | 0.343936831  |
| histone storage                                   | 0.339464123  |
| histone substrate                                 | 0.35574259   |
| histone substrates                                | 0.341151097  |
| histone supply                                    | 0.345221308  |
| histone tails                                     | 0.345094724  |
| histone target                                    | 0.341992391  |
| histone translation                               | 0.358028092  |
| histones                                          | 0.35281179   |
| hiv activation                                    | 0.375939168  |
| hiv inhibition                                    | 0.302196679  |
| hormone response element-binding protein          | 0.163126635  |
| hormone response element-binding proteins         | 0.12315852   |
| hormone-dependent activation                      | 0.364333368  |
| hormone-dependent trans-activator                 |              |
| host cofactors                                    | 0.063030587  |
| hsp                                               | 0.314497525  |
| hsp expression                                    | 0.273273315  |
| hsp genes                                         |              |
| hsp proteins                                      | 0.258163554  |
| human acetylation polymorphism                    | 0.340560815  |
| human amniotic fibroblasts                        | 0.259524705  |
| human autosomal recessive osteogenesis imperfecta |              |
| human autosomal recessive osteogenesis imperfecta |              |
| human carnitine acetyltransferase                 | 0.321490494  |
| human cells inhibited dna replication             | -0.063326906 |
| human choline acetyltransferase                   | 0.360231337  |
| human choline acetyltransferase genomic sequence  | 0.262213927  |
| human collagenase                                 | 0.214267694  |
| human collagenase inhibitor                       | 0.307006338  |
| human collagens                                   | 0.247836093  |
| human connective tissue disorders                 | 0.077393904  |
| human dermal fibroblast cdna                      | -0.015421861 |
| human dermal fibroblasts                          | 0.308566995  |
| human dermal fibroblasts                          | 0.308566995  |
| human dermal microvascular endothelial cells      | 0.085590297  |
| human dermal microvasculature                     | 0.163712449  |

|                                             |             |
|---------------------------------------------|-------------|
| human dermal vascular endothelial cell cdna | 0.075614115 |
| human diploid fibroblasts                   | 0.258315008 |
| human ehlers-danlos syndrome                | 0.020530194 |
| human female fibroblasts                    | 0.226673682 |
| human fibroblast collagenase                | 0.012083342 |
| human fibroblasts                           | 0.269886195 |
| human foreskin dermal fibroblasts           | 0.303726335 |
| human foreskin dermal fibroblasts           | 0.303726335 |
| human foreskin fibroblasts                  | 0.264779614 |
| human gastric intrinsic factor cdna clone   | 0.041863703 |
| human gingival fibroblasts                  | 0.259674458 |
| human heat-shock protein                    | 0.316659084 |
| human jurkat cdna library                   | 0.072926841 |
| human jurkat cell cdna                      | 0.073380565 |
| human jurkat cell cdna libraries            | 0.068180591 |
| human jurkat cells                          | 0.091656312 |
| human jurkat t-cell cdna expression library | 0.016053597 |
| human jurkat t-cell cdna library            | 0.010730018 |
| human jurkat t-cell leukemia                | 0.044030685 |
| human jurkat t-cell leukemia cells          | 0.026983371 |
| human melanoma cells inhibited tumor growth | 0.045892239 |
| human mps iic fibroblasts                   | 0.229017756 |
| human neutrophil collagenase                | 0.084894603 |
| human pkc-delta                             |             |
| human plantar fibroblasts                   | 0.267110542 |
| human primary fibroblasts                   | 0.249606946 |
| human sclera                                | 0.056133831 |
| human septic shock                          | 0.299182806 |
| human skin fibroblast collagenase           |             |
| human transforming growth factor-beta       | 0.256285375 |
| human transforming growth factor-beta       | 0.256285375 |
| hydroxamic                                  | 0.385942192 |
| hypertrophic chondrocyte apoptosis          | 0.343118495 |
| hypertrophic chondrocyte-specific genes     |             |
| ii collagen                                 | 0.374113153 |
| ii collagens                                | 0.249599111 |
| ii histone deacetylases                     | 0.346651731 |
| ii histone deacetylases                     | 0.346651731 |
| iii collagen                                | 0.369393099 |
| iii collagens                               | 0.290732094 |
| immobilized collagen                        | 0.375550538 |

|                                                         |             |
|---------------------------------------------------------|-------------|
| impaired apoptosis                                      | 0.305582025 |
| impaired chondrocyte apoptosis                          | 0.319170361 |
| impaired coactivator binding                            | 0.39638617  |
| impaired coactivator recruitment                        | 0.395023196 |
| impaired collagen folding                               | 0.381780052 |
| impaired transactivation                                | 0.381592512 |
| imperfecta                                              | 0.354002257 |
| inactivating serine phosphorylation                     | 0.328552752 |
| inactive chromatin remodeling                           | 0.291514647 |
| inappropriate apoptosis                                 | 0.31138616  |
| increased acetylation                                   | 0.444417855 |
| increased activation                                    | 0.368659593 |
| increased ameloblast apoptosis                          | 0.325242357 |
| increased apoptosis                                     | 0.321230904 |
| increased apoptotic activity                            | 0.361216978 |
| increased apoptotic cell death                          | 0.253117345 |
| increased apoptotic resistance                          | 0.289309433 |
| increased basal phosphorylation                         | 0.332367323 |
| increased bronchiolar subepithelial collagen deposition | 0.382412392 |
| increased chromatin acetylation                         | 0.416977558 |
| increased collagen                                      | 0.384215983 |
| increased collagen deposition                           | 0.383470451 |
| increased collagen staining                             | 0.389893188 |
| increased dermal melanin                                | 0.190775408 |
| increased fracture risk                                 | 0.063837642 |
| increased glucocorticoid transactivation                | 0.409936299 |
| increased lymphocyte apoptosis                          | 0.312413469 |
| increased mucosal remodeling                            | 0.198664862 |
| increased nad-dependent deacetylase activity            | 0.379452392 |
| increased neuroepithelial apoptosis                     | 0.316817678 |
| increased phosphorylation                               | 0.338039424 |
| increased stromal cell apoptosis                        | 0.324457432 |
| increased threonine phosphorylation                     | 0.324998126 |
| increased tonic inhibition                              | 0.226328997 |
| increased transactivation                               | 0.418912635 |
| increased transactivation potential                     | 0.406517218 |
| increased type iii collagen expression                  |             |
| increased vertebral fracture risk                       | 0.07063468  |
| indirect inhibition                                     | 0.269471412 |
| individual human lysine deacetylase                     | 0.322007191 |
| individual lysine deacetylases                          |             |

|                                             |              |
|---------------------------------------------|--------------|
| indomethacin inhibition                     | 0.281424765  |
| induced apoptosis                           | 0.31785655   |
| induced human fibroblasts                   | 0.28995131   |
| induced phosphorylation                     | 0.348814131  |
| inducible phosphorylation                   | 0.34563242   |
| inducible phosphorylation site              | 0.348258191  |
| inducible transactivation                   | 0.413679899  |
| inducing apoptosis                          | 0.316494783  |
| inflammatory caspase subfamily              |              |
| inflammatory heat hyperalgesia              |              |
| inherited connective tissue disorders       | 0.072747379  |
| inherited nonlethal caspase abnormalities   | 0.300701386  |
| inhibited                                   | 0.306248386  |
| inhibited ability                           | 0.292424702  |
| inhibited activation                        | 0.377266784  |
| inhibited activation                        | 0.377266784  |
| inhibited adhesion                          | 0.023161157  |
| inhibited amyloid formation                 | 0.040960302  |
| inhibited apoptosis                         | 0.336266906  |
| inhibited apoptosis                         | 0.336266906  |
| inhibited bone formation                    | 0.086785418  |
| inhibited bone growth                       | 0.132387506  |
| inhibited cell death                        | 0.155408957  |
| inhibited cell division                     | 0.063578614  |
| inhibited cell growth                       | 0.12874974   |
| inhibited cell transformation               | 0.101232008  |
| inhibited contraction                       | 0.286627793  |
| inhibited degradation                       | 0.061555478  |
| inhibited differentiation                   | 0.044624233  |
| inhibited dna replication                   | -0.08057056  |
| inhibited dna synthesis                     | -0.035775978 |
| inhibited dynein                            | 0.14328693   |
| inhibited entry                             | 0.188109662  |
| inhibited epidermal growth factor induction | 0.134214742  |
| inhibited erythroblast binding              | 0.226292911  |
| inhibited erythrocyte invasion              | 0.235375417  |
| inhibited expression                        | 0.125591405  |
| inhibited extension                         | 0.246731235  |
| inhibited extracts                          | 0.273588545  |
| inhibited formation                         | 0.16653808   |
| inhibited golgi fragmentation               | 0.096688288  |

|                                    |              |
|------------------------------------|--------------|
| inhibited growth                   | 0.166975838  |
| inhibited hela cell growth         | 0.145623452  |
| inhibited homologous recombination |              |
| inhibited induction                | 0.198621956  |
| inhibited infection                | 0.063387242  |
| inhibited interaction              | 0.27879014   |
| inhibited intestinal adhesion      | -0.006802246 |
| inhibited iron release             | 0.037571855  |
| inhibited muscle differentiation   | 0.090305314  |
| inhibited packaging                | 0.296894822  |
| inhibited phosphorylation          | 0.35558216   |
| inhibited phosphorylation          | 0.35558216   |
| inhibited process outgrowth        | 0.147674843  |
| inhibited processing               | 0.214877502  |
| inhibited production               | 0.160820458  |
| inhibited proliferation            | 0.141871114  |
| inhibited proteolysis              | 0.17131165   |
| inhibited random migration         | 0.200832125  |
| inhibited secretion                | 0.09886251   |
| inhibited sleep                    | 0.165692351  |
| inhibited spindle formation        | -0.07357699  |
| inhibited splicing                 | 0.080511484  |
| inhibited transcription            | 0.194004905  |
| inhibited transport                | 0.023698606  |
| inhibited tumor angiogenesis       | 0.030771419  |
| inhibited tumor growth             | 0.042842351  |
| inhibited ubiquitination           | 0.004713831  |
| inhibiting phosphorylation         | 0.339050046  |
| inhibition                         | 0.293106631  |
| inhibition constant                | 0.263489662  |
| inhibition experiments             | 0.26046143   |
| inhibition mechanism               | 0.282256686  |
| inhibition properties              | 0.253716013  |
| inhibition results                 | 0.23887318   |
| inhibition studies                 | 0.251909919  |
| inhibitory cofactors               | 0.085839749  |
| inhibitory smad                    | 0.295372487  |
| initiator                          | 0.312554768  |
| initiator assembly                 | 0.163220859  |
| initiator caspases                 | 0.322062826  |
| initiator caspases                 | 0.322062826  |

|                                                      |              |
|------------------------------------------------------|--------------|
| initiator codon                                      | 0.124149669  |
| initiator codon recognition                          | 0.054095045  |
| initiator element                                    | 0.213510588  |
| initiator elements                                   | 0.151397515  |
| initiator methionine                                 | 0.132682006  |
| initiator methionine codon                           | 0.066909337  |
| initiator methionine mutation                        |              |
| initiator methionine residue                         | 0.147180761  |
| initiator protein                                    | 0.198860294  |
| initiator region                                     | 0.167496841  |
| initiator sequence                                   | 0.113128491  |
| insoluble apoptotic bodies                           | 0.278087074  |
| insulin control element-binding transcription factor | 0.163748631  |
| interfacial activation                               | 0.36216506   |
| interferon-gamma activation site element             | 0.363164197  |
| interlobular connective tissue                       | 0.153491851  |
| interstitial collagen                                | 0.375167353  |
| interstitial collagen deposition                     | 0.375200466  |
| interstitial collagen expression                     | 0.37461524   |
| interstitial collagenase                             | 0.270653336  |
| interstitial collagens                               | 0.336547665  |
| interstitial connective tissue cells                 | 0.047970816  |
| interstitial fibrillar collagens                     | 0.312619404  |
| intracellular caspase activity                       | 0.3329976    |
| intracellular metal ion chaperone                    | 0.229774391  |
| intrinsic                                            | 0.329296081  |
| intrinsic acetyltransferase activity                 | 0.451873854  |
| intrinsic acetyltransferase activity                 | 0.451873854  |
| intrinsic activity                                   | 0.313691287  |
| intrinsic adhesiveness                               | 0.327862666  |
| intrinsic adjuvant activity                          | 0.286942793  |
| intrinsic androgenic activity                        | 0.301682273  |
| intrinsic apoptosis pathway                          | 0.306959415  |
| intrinsic apoptosis pathway                          | 0.306959415  |
| intrinsic atopic dermatitis                          | 0.028967914  |
| intrinsic attribute                                  | 0.322789366  |
| intrinsic auxiliary subunits                         | -0.061056671 |
| intrinsic b-cell defect                              | 0.007837889  |
| intrinsic b-cell signaling                           | 0.078305015  |
| intrinsic blood coagulation cascade                  | 0.186372968  |
| intrinsic catabolism                                 | 0.117446239  |



|                                              |              |
|----------------------------------------------|--------------|
| intrinsic catalytic activity                 | 0.255880087  |
| intrinsic cell defect                        | 0.001908584  |
| intrinsic channel properties                 | -0.073552171 |
| intrinsic chloride channel activity          | -0.017592375 |
| intrinsic circadian period                   | -0.021659152 |
| intrinsic clearance                          | 0.028103738  |
| intrinsic component                          | 0.108255875  |
| intrinsic congenital testicular abnormality  | 0.010707302  |
| intrinsic deacetylase activity               | 0.417474156  |
| intrinsic deacetylase activity               | 0.417474156  |
| intrinsic defect                             | -0.042957796 |
| intrinsic difference                         | 0.19847556   |
| intrinsic differences                        | 0.14564613   |
| intrinsic electrophysiologic properties      | 0.147337222  |
| intrinsic enhancement                        | 0.354284214  |
| intrinsic enzymatic activity                 | 0.246247935  |
| intrinsic factor                             | 0.109103939  |
| intrinsic factor deficiency                  | 0.030259896  |
| intrinsic feedback inhibitor                 | 0.27728574   |
| intrinsic feedback mechanism                 | 0.157746682  |
| intrinsic gap activity                       | 0.065444788  |
| intrinsic glutamatergic connections          | 0.002132813  |
| intrinsic glycoprotein                       | 0.03959501   |
| intrinsic gtpase activity                    | 0.119911765  |
| intrinsic histone acetyltransferase activity | 0.405475285  |
| intrinsic histone acetyltransferase activity | 0.405475285  |
| intrinsic histone acetyltransferase activity | 0.405475285  |
| intrinsic histone chaperone activity         | 0.470128138  |
| intrinsic histone chaperone activity         | 0.470128138  |
| intrinsic histone chaperone activity         | 0.470128138  |
| intrinsic instability                        | 0.035706129  |
| intrinsic kinase activity                    | 0.219757084  |
| intrinsic light response                     | 0.038153925  |
| intrinsic lipid kinase activity              | 0.203995282  |
| intrinsic low maturation efficiency          | 0.011232693  |
| intrinsic mechanism                          | 0.276380849  |
| intrinsic mechanisms                         | 0.197606679  |
| intrinsic membrane glycoprotein              | -0.017038238 |
| intrinsic membrane molecule                  | -0.021646013 |
| intrinsic membrane protein                   | 0.041331405  |
| intrinsic membrane-bound form                | 0.090207289  |

|                                                 |              |
|-------------------------------------------------|--------------|
| intrinsic negative modulator                    | 0.113599214  |
| intrinsic negative regulator                    | 0.062939697  |
| intrinsic neural differentiation                | -0.072154943 |
| intrinsic nonlinear behavior                    | 0.014209122  |
| intrinsic ocular structures                     | 0.102509769  |
| intrinsic parp activity                         | 0.086963718  |
| intrinsic part                                  | 0.277213844  |
| intrinsic passive properties                    | 0.159726962  |
| intrinsic pathway                               | 0.105659261  |
| intrinsic pathways                              | 0.161958479  |
| intrinsic phosphatase activity                  | -0.001454175 |
| intrinsic photosensitivity                      | 0.23670997   |
| intrinsic plasma membrane protein               | -0.025984091 |
| intrinsic polarity                              | 0.013671917  |
| intrinsic proliferation                         | 0.104896394  |
| intrinsic propensity                            | 0.281298324  |
| intrinsic properties                            | 0.176063183  |
| intrinsic property                              | 0.33221398   |
| intrinsic protein kinase activity               | 0.220616356  |
| intrinsic protein-tyrosine phosphatase activity | 0.037008169  |
| intrinsic qualitative differences               | 0.1419621    |
| intrinsic regulator                             | 0.101435123  |
| intrinsic renal abnormality                     | 0.028401408  |
| intrinsic renal cells                           | 0.007291405  |
| intrinsic resistance                            | 0.097109908  |
| intrinsic role                                  | 0.141026646  |
| intrinsic substrate                             | 0.201620336  |
| intrinsic sulfate transport properties          | -0.014812296 |
| intrinsic susceptibility                        | -0.031672043 |
| intrinsic transactivation domain                | 0.403262913  |
| intrinsic transactivation domain                | 0.403262913  |
| intrinsic transcription activity                | 0.205036755  |
| intrinsic tyrosine kinase activity              | 0.191521349  |
| intrinsic ubiquitin ligase activities           |              |
| intrinsic ubiquitin ligase activity             | -0.064064132 |
| intrinsic ubiquitin-protein ligase activity     | -0.027802679 |
| intrinsic variation                             | 0.151752475  |
| invertebrate collagens                          | 0.328773692  |
| inverted ccaat box                              | 0.042712061  |
| inverted ccaat element                          | 0.136536159  |
| irf activation                                  | 0.378087446  |

|                                            |             |
|--------------------------------------------|-------------|
| iron regulatory element-binding activities | 0.06776173  |
| iron-responsive element-binding activity   | 0.350977184 |
| irradiated fibroblasts                     | 0.278364562 |
| irradiation-induced apoptosis              | 0.312027864 |
| isolated dermal fibroblasts                | 0.325612946 |
| isolated dermal fibroblasts                | 0.325612946 |
| isolated fibroblasts                       | 0.284880712 |
| isolated transactivation domains           | 0.356680526 |
| isoniazid acetylation                      | 0.411811356 |
| jurkat                                     | 0.364886162 |
| jurkat cdna                                | 0.088172984 |
| jurkat cdna libraries                      | 0.079832979 |
| jurkat cdna library                        | 0.075526738 |
| jurkat cell cdna                           | 0.078727911 |
| jurkat cell cdna library                   | 0.070073248 |
| jurkat cell cytosol                        | 0.182387381 |
| jurkat cell messages                       | 0.166061162 |
| jurkat cells                               | 0.099634252 |
| jurkat human t-cell                        | 0.034698007 |
| jurkat human t-cell cdna library           | 0.010730018 |
| jurkat human t-cell library                | 0.031705292 |
| jurkat human t-cell nuclear extracts       | 0.056761009 |
| jurkat lymphoblastoid cell cdna library    | 0.071828233 |
| jurkat lymphocytes                         | 0.150077061 |
| jurkat t-cell                              | 0.031382334 |
| jurkat t-cell cdna                         | 0.010481932 |
| jurkat t-cell cdna libraries               |             |
| jurkat t-cell cdna library                 | 0.007673567 |
| jurkat t-cell expression library           | 0.034799657 |
| jurkat t-cell extracts                     | 0.032756964 |
| jurkat t-cell leukemia cell lines          | 0.041700354 |
| jurkat t-cell leukemia cells               | 0.025129634 |
| jurkat t-cells                             | 0.301662449 |
| jurkat t-lymphocyte cdna library           | 0.076571153 |
| jurkat t-lymphocyte expression library     | 0.195650674 |
| jurkat t-lymphocytes                       | 0.34781959  |
| kidney fibroblasts                         | 0.241384524 |
| kinase inhibitor staurosporine             |             |
| labeled procollagen substrate              | 0.369335559 |
| late apoptosis                             | 0.309530043 |
| latent inhibition                          | 0.315315231 |

|                                                        |             |
|--------------------------------------------------------|-------------|
| latent transforming growth factor-beta                 | 0.26118712  |
| latent transforming growth factor-beta                 | 0.26118712  |
| lateral inhibition                                     |             |
| left ventricular remodeling                            | 0.10008923  |
| lens apoptosis                                         | 0.305201655 |
| lethal osteogenesis imperfecta congenita               | 0.313682575 |
| lethal osteogenesis imperfecta congenita               | 0.313682575 |
| light-induced apoptosis                                | 0.308386191 |
| linker histone                                         | 0.348151549 |
| linker histones                                        | 0.314112264 |
| lipid remodeling                                       | 0.097220571 |
| lithium inhibition                                     | 0.271918439 |
| local activation                                       | 0.361350377 |
| local feedback inhibition                              | 0.229929408 |
| local helix unfolding map                              | 0.064245389 |
| local histone                                          | 0.345105781 |
| local inhibition                                       | 0.289018753 |
| local nucleosomal domain                               | 0.216199633 |
| localized inhibition                                   | 0.22717049  |
| long bone fracture                                     | 0.097703245 |
| loose connective tissue                                | 0.147873729 |
| loose connective tissues                               | 0.147474543 |
| lovastatin induced apoptosis                           | 0.317875684 |
| low intrinsic gtpase activity                          | 0.101186888 |
| low-affinity inhibition sites                          | 0.269312977 |
| lower acetylation capacity                             | 0.432676313 |
| lower intrinsic clearance                              | 0.022024874 |
| lower intrinsic gtpase activity                        | 0.114814422 |
| lymphatic dermal human microvascular endothelial cells | 0.085554675 |
| lymphatic remodeling                                   | 0.29970483  |
| lysine acetylation                                     | 0.4196166   |
| lysine acetyltransferases                              |             |
| main phosphorylation domain                            | 0.339580282 |
| major acetyltransferase                                | 0.420161908 |
| major carboxy-terminal transactivation domains         | 0.373139819 |
| major collagen                                         | 0.372081027 |
| major intrinsic protein                                | 0.165061666 |
| major phosphorylation site                             | 0.328625559 |
| mammalian apoptosis                                    | 0.307251467 |
| mammalian cells inhibited cell growth                  | 0.064169005 |
| mammalian cells potentiated activation                 | 0.228635339 |

|                                            |             |
|--------------------------------------------|-------------|
| mammalian fibroblasts                      | 0.273966941 |
| mammalian histone deacetylase              | 0.353960213 |
| mammalian histone deacetylase              | 0.353960213 |
| manganese inhibited activity               | 0.294952728 |
| massive apoptosis                          | 0.308540767 |
| massive apoptotic cell death               | 0.233120899 |
| massive apoptotic death                    | 0.28436224  |
| massive remodeling                         | 0.278620502 |
| maternal inhibition                        | 0.234279495 |
| matrix remodeling                          | 0.285262034 |
| matrix-associated deacetylase bodies       | 0.33710598  |
| mature caspase molecule                    | 0.293044139 |
| mature type iii procollagen molecules      | 0.274059927 |
| maximal activation                         | 0.36344955  |
| maximal apoptosis                          | 0.318325017 |
| maximal inhibition                         | 0.285724833 |
| maximal phosphorylation                    | 0.332592141 |
| maximum transactivation                    | 0.413061922 |
| mediated transactivation                   | 0.409439312 |
| medullary connective tissue                | 0.096015686 |
| membrane phospholipid remodeling           | 0.051496486 |
| membrane remodeling                        | 0.080824762 |
| meningeal basement membrane remodeling     | 0.132809991 |
| meningeal fibroblasts                      | 0.322330039 |
| mesangial cell apoptosis                   | 0.308431132 |
| metal cofactors                            | 0.141408289 |
| metalloproteinase inhibition               | 0.24190722  |
| methionine initiator codon                 | 0.066909337 |
| methyl bromide                             |             |
| methylated histones                        |             |
| microtubule remodeling                     | 0.002775267 |
| microtubule-associated deacetylase         |             |
| migrating fibroblasts                      | 0.314846657 |
| mild heat shock                            | 0.318012165 |
| mild heat shock                            | 0.318012165 |
| mild osteogenesis imperfecta               | 0.352584331 |
| mild osteogenesis imperfecta               | 0.352584331 |
| minimal activation                         | 0.363814194 |
| minor collagens                            | 0.314778727 |
| mitochondrial acetyl-coa acetyltransferase | 0.367679046 |
| mitochondrial apoptotic pathway            | 0.219241164 |

|                                                  |              |
|--------------------------------------------------|--------------|
| mitochondrial deacetylase                        | 0.290466631  |
| mitogen activation induced recruitment           | 0.37219221   |
| mitogenic activation                             | 0.360200901  |
| moderate heat shock                              | 0.315138432  |
| moderate heat shock                              | 0.315138432  |
| moderate inhibition                              | 0.285549952  |
| modified histone                                 | 0.340574322  |
| modified histones                                | 0.318333939  |
| modulated apoptosis                              | 0.314841373  |
| monkey fibroblasts                               | 0.321769097  |
| morpholino inhibition                            | 0.283436123  |
| morpholino oligonucleotide inhibition            | 0.271203262  |
| mouse creb-binding protein                       |              |
| mouse embryonic stem cells inhibited cell growth | -0.032389665 |
| mps iiii fibroblasts                             | 0.269712096  |
| mps vii fibroblasts                              | 0.228276828  |
| mucosal remodeling                               | 0.199384319  |
| multiple collagens                               | 0.298675288  |
| multiple fractures                               | 0.223101697  |
| multiple histone deacetylases                    | 0.341640188  |
| multiple histone deacetylases                    | 0.341640188  |
| multiple phosphorylation                         | 0.322481224  |
| multiple smad partners                           | 0.353621572  |
| multiple spontaneous bone fractures              |              |
| multiprotein coactivator                         | 0.418332056  |
| multiprotein coactivator complex                 | 0.394597889  |
| mutant collagens                                 |              |
| mutant inhibited basal                           | -0.09169528  |
| mutant procollagen                               | 0.167308225  |
| mutant templates                                 |              |
| mycobacterial heat-shock proteins                | 0.30347146   |
| myoblasts inhibited expression                   | 0.11670056   |
| myocardial apoptosis                             | 0.32758361   |
| myocyte activation                               | 0.386679054  |
| myocyte apoptosis                                | 0.331949561  |
| myofibroblast                                    | 0.291474339  |
| myofibroblast activation                         | 0.382359633  |
| myofibroblast activation                         | 0.382359633  |
| myofibroblast cell phenotype                     | -0.05710842  |
| myofibroblast differentiation                    | -0.010045351 |
| myofibroblast phenotype                          |              |

|                                             |              |
|---------------------------------------------|--------------|
| myofibroblast transdifferentiation          | 0.206261289  |
| myofibroblast transformation                | 0.129500401  |
| myofibroblast viability                     | 0.119596971  |
| nad cofactors                               | 0.082889312  |
| nad-dependent histone deacetylases          | 0.349189063  |
| nad-dependent histone deacetylases          | 0.349189063  |
| naked dna templates                         | -0.105109136 |
| naked templates                             | 0.169003175  |
| narrow palpebral fissures                   | 0.186651584  |
| native intrinsic factor                     | 0.109749348  |
| n-ethylmaleimide inhibition                 | 0.284087239  |
| neurofilament phosphorylation               |              |
| neuroimmune activation                      | 0.360232786  |
| neutrophil collagenase                      | 0.089334416  |
| nicotinamide adenine dinucleotide cofactors | 0.073035699  |
| nk-cell apoptosis                           | 0.315831141  |
| nociceptor activation                       | 0.358910351  |
| nocturnal activation                        | 0.358813502  |
| nonhistone                                  | 0.41007249   |
| non-histone                                 | 0.394494553  |
| nonhistone chromosomal                      |              |
| nonhistone chromosomal protein              | 0.04580562   |
| nonhistone chromosomal proteins             | -0.047468768 |
| nonhistone dna                              | -0.09510681  |
| nonhistone modifier factors                 | 0.094544247  |
| nonhistone protein                          | 0.160308333  |
| nonhistone proteins                         | 0.046626779  |
| nonhistone region                           | 0.101190698  |
| nonhistone substrate                        | 0.181701645  |
| nonhistone substrates                       | 0.143800269  |
| nonlethal osteogenesis imperfecta           | 0.348094501  |
| nonlethal osteogenesis imperfecta           | 0.348094501  |
| nonspecific connective tissue disorder      | 0.054120345  |
| normal apoptosis                            | 0.306475212  |
| normal collagen folding                     | 0.378165628  |
| normal fibroblasts                          | 0.256463107  |
| normal remodeling                           | 0.206667108  |
| normal senescent fibroblasts                | 0.250453384  |
| normal tendon                               | 0.103074569  |
| normal transactivation                      | 0.381482671  |
| normal transactivation activity             | 0.398409652  |

|                                                   |              |
|---------------------------------------------------|--------------|
| normal valve remodeling                           | 0.213733633  |
| noxious heat                                      | 0.31171552   |
| noxious heat sensor                               | 0.306192843  |
| noxious thermal heat                              | 0.315441699  |
| n-terminal acetylated form                        | 0.371493483  |
| n-terminal acetylation                            | 0.425280899  |
| n-terminal apoptotic domain                       | 0.298576244  |
| n-terminal caspase recruitment domain             | 0.341410055  |
| n-terminal caspase recruitment domains            | 0.333202165  |
| n-terminal histone tails                          | 0.34133511   |
| n-terminal minimal transactivation domain         | 0.343192888  |
| n-terminal protein acetylation                    | 0.421602501  |
| n-terminal protein acetyltransferase activity     | 0.370461853  |
| n-terminal protein-binding domain                 |              |
| n-terminal transactivation domain                 | 0.345694502  |
| nuclear apoptosis                                 | 0.326675975  |
| nuclear chaperone phosphoproteins                 | 0.306101566  |
| nuclear coactivators                              | 0.372861225  |
| nuclear histones                                  | 0.232930197  |
| nuclear hormone receptor-mediated transactivation | 0.252040411  |
| nuclear nonhistone protein                        | 0.153053937  |
| nuclear response element-binding protein          | 0.204010512  |
| nucleosomal                                       | 0.35775997   |
| nucleosomal antigens                              | 0.008719229  |
| nucleosomal arrays                                | 0.290337035  |
| nucleosomal binding domain                        | 0.202590268  |
| nucleosomal core histones                         | 0.336817216  |
| nucleosomal core histones                         | 0.336817216  |
| nucleosomal dna                                   |              |
| nucleosomal dna fragmentation                     | -0.048944404 |
| nucleosomal fragmentation                         | 0.433137626  |
| nucleosomal fragments                             | 0.298388191  |
| nucleosomal histone                               | 0.34913547   |
| nucleosomal histone                               | 0.34913547   |
| nucleosomal histones                              | 0.360426168  |
| nucleosomal histones                              | 0.360426168  |
| nucleosomal organization                          | 0.238270058  |
| nucleosomal response                              | 0.151707677  |
| nucleosomal substrates                            | 0.204001653  |
| nucleosomal targeting                             | 0.084210661  |
| nucleosomal units                                 | 0.328910211  |



|                                  |             |
|----------------------------------|-------------|
| nucleosome remodeling            | 0.348764778 |
| nucleosome remodeling activities | 0.347117182 |
| nucleosome remodeling complex    | 0.27264522  |
| nucleosome remodeling factor     | 0.208544163 |
| n-wasp activation                | 0.358563433 |
| observed cellular activation     | 0.3586404   |
| oligodendrocyte apoptosis        | 0.31076441  |
| oncoproteins                     | 0.329395817 |
| opsin phosphorylation            | 0.331814046 |
| orderly activation               | 0.362675152 |
| osmotic shock                    | 0.298100698 |
| osteoblast apoptosis             | 0.304692942 |
| osteogenesis                     | 0.341014187 |
| osteogenesis imperfecta          | 0.350625256 |
| osteogenesis imperfecta          | 0.350625256 |
| osteogenesis imperfecta type ix  | 0.358672273 |
| osteogenesis imperfecta type ix  | 0.358672273 |
| osteogenesis imperfecta type vi  | 0.345907558 |
| osteogenesis imperfecta type vi  | 0.345907558 |
| osteogenesis imperfecta type vii | 0.326819796 |
| osteogenesis imperfecta type vii | 0.326819796 |
| osteoporotic fracture            | 0.272210824 |
| osteoporotic fracture risk       | 0.077518936 |
| osteoporotic fractures           | 0.268964287 |
| osteoporotic vertebral fractures | 0.245745599 |
| ouabain inhibition               | 0.276164063 |
| painful heat                     | 0.314078066 |
| palpebral                        | 0.293559002 |
| palpebral fissures               | 0.295243035 |
| paradoxical activation           | 0.360082598 |
| parallel apoptotic pathways      | 0.282254681 |
| partial inhibition               | 0.26974183  |
| partial transactivation domain   | 0.377051685 |
| partial unfolding                | 0.103318962 |
| partially inhibited conversion   | 0.157505069 |
| pathologic fractures             | 0.311581432 |
| pathologic phosphorylation       | 0.329920261 |
| pathologic vascular remodeling   | 0.180633605 |
| patient fibroblasts              | 0.320677884 |
| pdgfr activation                 | 0.370536436 |
| pelvic fracture                  | 0.268871198 |

|                                                                       |              |
|-----------------------------------------------------------------------|--------------|
| pericyte apoptosis                                                    | 0.317362791  |
| periodic inhibition                                                   | 0.240149129  |
| permanent activation                                                  | 0.360896761  |
| persistent phosphorylation                                            | 0.324687908  |
| pharmacologic inhibition                                              | 0.268945826  |
| pharmacologic inhibition studies                                      | 0.233805289  |
| phorbol ester activation                                              | 0.373195419  |
| phorbol myristate acetate activation                                  | 0.372003251  |
| phospholipid remodeling                                               | 0.208064797  |
| phosphopeptides                                                       | 0.299943772  |
| phosphorylation                                                       | 0.329901243  |
| phosphorylation activity                                              | 0.352092174  |
| phosphorylation cascade                                               | 0.342198255  |
| phosphorylation events                                                | 0.325292559  |
| phosphorylation increase                                              | 0.32657687   |
| phosphorylation induced huvec migration                               | 0.359091433  |
| phosphorylation level                                                 | 0.325598499  |
| phosphorylation loop                                                  | 0.327484658  |
| phosphorylation motifs                                                | 0.323263375  |
| phosphorylation reaction                                              | 0.33082876   |
| phosphorylation reactions                                             | 0.328406322  |
| phosphorylation response                                              | 0.326054838  |
| phosphorylation sink                                                  | 0.328026354  |
| phosphorylation site                                                  | 0.333313726  |
| phosphorylation sites                                                 | 0.324106503  |
| phosphorylation state                                                 | 0.327769689  |
| phosphorylation states                                                | 0.329531685  |
| phosphorylation status                                                | 0.326578403  |
| phosphorylation target                                                | 0.330125889  |
| phosphorylation targets                                               | 0.32252649   |
| physiologic activation                                                | 0.35928297   |
| pkc-delta                                                             | 0.326099207  |
| pkc-delta activation                                                  | 0.39905839   |
| pkc-delta activation                                                  | 0.39905839   |
| pkc-epsilon phosphorylation site                                      | 0.340414783  |
| placental collagen                                                    | 0.374265891  |
| platelet cdna templates                                               | -0.010100201 |
| platelet-derived growth factor-beta                                   | 0.22420534   |
| pluripotent hematopoietic progenitor cells inhibited colony formation | 0.015047142  |
| polymorphonuclear activation                                          | 0.360252811  |
| poor acetyl acceptors                                                 |              |

|                                                 |             |
|-------------------------------------------------|-------------|
| poor phosphorylation                            | 0.325109872 |
| poor transactivator                             | 0.124182426 |
| portal fibroblasts                              | 0.332216736 |
| positive coactivators                           | 0.42919732  |
| positive cofactors                              | 0.148501438 |
| postmenopausal osteoporotic fracture            | 0.210161345 |
| posttranslational histone modifications         | 0.346009516 |
| posttranslational phosphorylation               | 0.341833619 |
| potential activation loop phosphorylation motif | 0.39509917  |
| potential activation loop phosphorylation motif | 0.39509917  |
| potential c-terminal phosphorylation site       | 0.329522113 |
| potential initiator methionine                  | 0.120822123 |
| potential phosphorylation domain                | 0.339359911 |
| potential phosphorylation site                  | 0.33303626  |
| potential phosphorylation sites                 | 0.323796896 |
| potential serine phosphorylation sites          | 0.327639234 |
| potentiated                                     | 0.289333548 |
| potentiated activation                          | 0.375084215 |
| potentiated activation                          | 0.375084215 |
| potentiated apoptosis                           | 0.325400522 |
| potentiated apoptosis                           | 0.325400522 |
| potentiated interaction                         | 0.233759385 |
| potentiated parathyroid hormone                 | 0.007421993 |
| potentiated responses                           |             |
| predominant caspase                             | 0.3141823   |
| preferred cofactors                             | 0.299666055 |
| preferred nucleosomal substrates                | 0.185743555 |
| preferred remodeling mechanism                  | 0.309807522 |
| primary adult fibroblasts                       | 0.232227078 |
| primary cultured embryo fibroblasts             | 0.278524193 |
| primary cultured fibroblasts                    | 0.336431828 |
| primary dermal fibroblasts                      | 0.346695759 |
| primary dermal fibroblasts                      | 0.346695759 |
| primary embryo fibroblasts                      | 0.247452077 |
| primary fibroblasts                             | 0.312237643 |
| primary foreskin fibroblasts                    | 0.307452389 |
| primary human dermal fibroblasts                | 0.288848566 |
| primary human dermal fibroblasts                | 0.288848566 |
| primary human diploid fibroblasts               | 0.23949008  |
| primary human fibroblasts                       | 0.249606946 |
| primary human foreskin fibroblasts              | 0.244794029 |

|                                               |              |
|-----------------------------------------------|--------------|
| primary human histone deacetylases            | 0.335946252  |
| primary phosphorylation                       | 0.327609973  |
| primary synovial fibroblasts                  | 0.327769201  |
| primary transforming activity                 | 0.348683307  |
| primed dna templates                          | -0.112245556 |
| primed phosphorylation                        | 0.324507245  |
| pro                                           | 0.341663025  |
| pro domain                                    | 0.238182467  |
| pro residue                                   | 0.286394803  |
| pro residues                                  | 0.193446918  |
| pro segment                                   |              |
| pro-apoptotic                                 | 0.307690047  |
| procollagen                                   | 0.363400915  |
| procollagen chain                             | 0.333465421  |
| procollagen genes                             | 0.222635261  |
| procollagen iia                               | 0.353360729  |
| procollagen suicide                           | 0.36695829   |
| procollagen synthesis                         | 0.350748117  |
| product inhibition                            | 0.238086822  |
| programmed remodeling                         | 0.357844691  |
| progressive apoptosis                         | 0.311342225  |
| progressive connective tissue nevi            | 0.12483443   |
| prokaryotic chloramphenicol acetyltransferase | 0.424799777  |
| proliferating fibroblasts                     | 0.28094417   |
| prolonged collagenase digestion               | 0.282080053  |
| prolonged pharmacologic inhibition            | 0.241441394  |
| prolonged phosphorylation                     | 0.325547835  |
| promoter activation                           | 0.381756986  |
| promoter transactivation                      | 0.341809624  |
| promoting apoptosis                           | 0.314208987  |
| proper angiogenic remodeling                  | 0.189777685  |
| protease-activating                           | 0.323171775  |
| protein acetylation                           | 0.437744012  |
| protein acetyltransferase                     | 0.411537866  |
| protein chaperone                             | 0.288401891  |
| protein kinase inhibitor staurosporine        | 0.240095884  |
| protein unfolding                             | 0.138632623  |
| protein-binding                               | 0.449430708  |
| protein-binding assays                        |              |
| protein-binding domain                        |              |
| protein-binding domains                       |              |

|                                   |             |
|-----------------------------------|-------------|
| protein-binding experiments       |             |
| protein-binding oligonucleotides  |             |
| protein-binding properties        |             |
| protein-binding signal            |             |
| protein-binding site              |             |
| protein-binding sites             |             |
| protein-tyrosine phosphorylation  | 0.335079385 |
| proteoglycans decorin             | 0.23097166  |
| proteolytic activation            | 0.360407243 |
| proteolytic activation site       | 0.36658698  |
| pulmonary arterial remodeling     | 0.14750894  |
| pulmonary vascular remodeling     | 0.132544594 |
| purified gabp                     | 0.116075925 |
| purified histone                  | 0.346365419 |
| purified histones                 | 0.302209303 |
| quail fibroblasts                 | 0.322897146 |
| quercetin                         | 0.423925121 |
| rabbit antihuman serum            |             |
| rabbit synovial fibroblasts       | 0.291794249 |
| rapamycin activation              | 0.385796945 |
| rapid acetylation                 | 0.41963479  |
| rapid apoptosis                   | 0.312777776 |
| rapid phosphorylation             | 0.328378869 |
| rapid serine phosphorylation      | 0.333577442 |
| rapid versus slow acetylation     | 0.369836391 |
| rat decorin                       | 0.05468424  |
| rat gabp beta subunits            |             |
| rat gastric intrinsic factor      | 0.066303073 |
| rat zap                           |             |
| rb protein-binding motif          |             |
| receptor-mediated apoptosis       | 0.316022286 |
| receptor-mediated phosphorylation | 0.330942975 |
| receptor-mediated smad activation | 0.442403302 |
| receptor-mediated smad activation | 0.442403302 |
| receptor-regulated smad proteins  | 0.255750345 |
| reciprocal protein-binding        |             |
| recombinant adenovirus            | 0.243223386 |
| recombinant adenovirus vector     | 0.236143026 |
| recurrent fractures               | 0.220168288 |
| redox cofactors                   | 0.04355087  |
| reduced acetylation               | 0.42989834  |

|                                                    |             |
|----------------------------------------------------|-------------|
| reduced acetylation activity                       | 0.441483343 |
| reduced apoptosis                                  | 0.309690798 |
| reduced downstream phosphorylation                 | 0.328596392 |
| reduced histone                                    | 0.342676514 |
| reduced procollagen processing                     | 0.33500842  |
| reduced transactivation potential                  | 0.387438388 |
| reductive activation                               | 0.361868358 |
| regional activation                                | 0.358506268 |
| regional specific apoptosis                        | 0.315213858 |
| regular nucleosomal arrays                         | 0.282366391 |
| regulated apoptosis                                | 0.314892181 |
| regulated histone acetylation                      | 0.406994002 |
| regulated histone acetylation                      | 0.406994002 |
| regulating apoptosis                               | 0.317047706 |
| regulatory element-binding proteins                | 0.127613283 |
| related cofactors                                  | 0.150666715 |
| related fibrillar collagens                        | 0.283904771 |
| remodeling                                         | 0.30205543  |
| remodeling atrioventricular endocardial cushions   | 0.239327083 |
| remodeling capillaries                             | 0.297939442 |
| remodeling pathway                                 | 0.203341305 |
| remodeling proteins                                | 0.171321282 |
| replacement histones                               | 0.3305012   |
| response element-binding protein                   | 0.232865257 |
| response element-binding proteins                  | 0.178505259 |
| resting fibroblasts                                | 0.325736356 |
| retinal remodeling                                 | 0.091945236 |
| retinoic acid release histone deacetylase activity | 0.246043052 |
| reverse ccaat box                                  | 0.049273181 |
| reversible acetylation                             | 0.432246306 |
| reversible inhibition                              | 0.305965864 |
| reversible phosphorylation                         | 0.33287412  |
| reversible protein phosphorylation                 | 0.323516452 |
| rhesus fibroblasts                                 | 0.313034054 |
| rhodopsin phosphorylation                          | 0.323543723 |
| rhythmic acetylation                               | 0.425300627 |
| ribosomal chaperone                                | 0.261453438 |
| rodent fibroblasts                                 | 0.301196158 |
| salicylate inhibition                              | 0.310076509 |
| sarcomere remodeling                               | 0.2571142   |
| sclera                                             | 0.403947414 |

|                                                 |             |
|-------------------------------------------------|-------------|
| scleroderma                                     | 0.40312337  |
| scleroderma autoimmune disease                  |             |
| scleroderma fibroblasts                         | 0.358332419 |
| scleroderma fibroblasts                         | 0.358332419 |
| scleroderma lesions                             | 0.021294819 |
| scleroderma patient                             | 0.197150632 |
| scleroderma patient sera                        | 0.172091254 |
| scleroderma skin                                | 0.041970783 |
| scleroderma status                              | 0.165433764 |
| secondary connective tissue manifestations      | 0.108632348 |
| selective apoptosis                             | 0.30715512  |
| selective phosphorylation                       | 0.323842563 |
| senescent cultured fibroblasts                  | 0.344940561 |
| senescent diploid fibroblasts                   | 0.301720123 |
| senescent fibroblasts                           | 0.313617819 |
| senescent human fibroblasts                     | 0.26206519  |
| septic shock                                    | 0.309521036 |
| septic shock patients                           | 0.204473335 |
| sequential activation                           | 0.362831758 |
| sequential phosphorylation                      | 0.331658483 |
| sequential remodeling                           | 0.31763548  |
| serial activation                               | 0.360426128 |
| serial histone modification                     | 0.338752013 |
| serine phosphorylation                          | 0.334975168 |
| severe apoptotic cell death                     | 0.223910575 |
| severe apoptotic defect                         |             |
| severe inhibition                               | 0.237423245 |
| severe osteogenesis imperfecta                  | 0.333795772 |
| severe osteogenesis imperfecta                  | 0.333795772 |
| severe osteogenesis imperfecta type iii         | 0.321568355 |
| severe osteogenesis imperfecta type iii         | 0.321568355 |
| severe septic shock                             | 0.290104655 |
| severe systemic connective tissue abnormalities |             |
| shared coactivators                             | 0.426224198 |
| sharp inhibition                                | 0.289396807 |
| shock                                           | 0.31601145  |
| shock elements                                  | 0.301547518 |
| short collagen domain                           | 0.381765854 |
| short collagen triple helix                     | 0.370843566 |
| short palpebral fissures                        |             |
| short-chain collagen domain                     | 0.382886329 |

|                                    |              |
|------------------------------------|--------------|
| short-chain collagen polypeptides  | 0.37208508   |
| short-chain minor collagen         | 0.370433973  |
| signature apoptotic fragments      | 0.308883805  |
| simple inhibition                  | 0.271806622  |
| single intrinsic immune effector   | -0.045622723 |
| single serine phosphorylation site | 0.322047046  |
| sirna inhibition                   | 0.304713174  |
| sirna reduced phosphorylation      | 0.342835938  |
| sirna treatment induced apoptosis  | 0.341288964  |
| skeletal remodeling                | 0.249236058  |
| slit inhibition                    | 0.245983557  |
| slow acetylation genotype          |              |
| slow intrinsic rate                | 0.068952245  |
| smad                               | 0.413200682  |
| smad activation                    | 0.457504988  |
| smad activation                    | 0.457504988  |
| smad anchor                        | 0.425498748  |
| smad localization                  | 0.199850485  |
| smad nuclear translocation         | 0.330409767  |
| smad pathway                       | 0.252141027  |
| smad phosphatase                   |              |
| smad protein complexes             | 0.274890462  |
| smad protein expression vectors    | 0.223767325  |
| smad proteins                      | 0.249099511  |
| smad signaling                     | 0.144320952  |
| smad signaling pathway             | 0.127332956  |
| smad signaling proteins            | 0.128588293  |
| smad substrate                     | 0.391388703  |
| smad target genes                  | 0.094263012  |
| smad target promoter               | 0.275443419  |
| smad transcription factor pathway  | 0.199527524  |
| small acetylated peptides          | 0.340041571  |
| small diameter collagen fibrils    | 0.368073475  |
| small heat-shock protein           | 0.321388597  |
| small heat-shock proteins          | 0.305822586  |
| small hsp                          | 0.312090533  |
| small nonhistone chromatin         | 0.235858012  |
| small palpebral fissures           | 0.165709289  |
| smooth muscle cell apoptosis       | 0.31739226   |
| s-nitroso-n-acetylpenicillamine    | 0.292581333  |
| snorncp chaperone                  | 0.302788594  |



|                                                       |             |
|-------------------------------------------------------|-------------|
| soft connective tissue matrix                         | 0.251978179 |
| soft connective tissues                               | 0.143465175 |
| soluble collagens                                     | 0.218519548 |
| soluble transforming growth factor-alpha              | 0.156631244 |
| somatic apoptosis                                     |             |
| somatic histones                                      | 0.233309988 |
| specialized chaperone                                 | 0.30454996  |
| specialized connective tissues                        | 0.134233418 |
| specific antihuman antibody                           | 0.069988698 |
| specific caspase cleavage site                        | 0.316827148 |
| specific chaperone                                    | 0.309789512 |
| specific coactivator complexes                        | 0.400953371 |
| specific inhibition                                   | 0.286273495 |
| specific interferon inhibition                        | 0.246337049 |
| specific nad-dependent deacetylase activity           | 0.374679181 |
| specific oncoproteins                                 | 0.217141165 |
| specific phosphorylation                              | 0.329827869 |
| specific phosphorylation events                       | 0.324901485 |
| specific protein-binding interface                    |             |
| specific transforming genes                           | 0.142411948 |
| spermatocyte apoptosis                                | 0.314058478 |
| spiral artery remodeling                              | 0.229225603 |
| splicing coactivators                                 | 0.34533728  |
| spontaneously transformed chinese hamster fibroblasts | 0.261794458 |
| srebp activation                                      | 0.37633012  |
| stabilized tibia fractures                            | 0.249850024 |
| stable heteroduplexes                                 |             |
| stage-specific inhibition                             | 0.280922475 |
| staurosporine                                         | 0.401907333 |
| staurosporine treatment                               | 0.262797129 |
| sterol regulatory element-binding proteins            | 0.072930551 |
| sterol response element-binding protein genes         |             |
| stimulated fibroblasts                                | 0.352720792 |
| stimulated jurkat cells                               | 0.119632293 |
| stimulated jurkat library                             | 0.375026631 |
| stimulated sapk phosphorylation                       | 0.339563874 |
| stimulation induced phosphorylation                   | 0.343680374 |
| stress activation                                     | 0.367287811 |
| stress apoptotic responses                            | 0.237800104 |
| stress fiber inhibition                               | 0.255413765 |
| stromal cell apoptosis                                | 0.319116739 |

|                                               |             |
|-----------------------------------------------|-------------|
| stromal fibroblasts                           | 0.248673709 |
| structural remodeling                         | 0.249447347 |
| substrate inhibition                          | 0.260114034 |
| substrate phosphorylation                     | 0.324953363 |
| suppressing activation                        | 0.357956543 |
| suppressing apoptosis                         | 0.310489101 |
| suppressing transactivation                   | 0.411082368 |
| sustained phosphorylation                     | 0.329236314 |
| synaptic remodeling                           |             |
| synchronous remodeling                        | 0.292445233 |
| synovial cell collagenase                     | 0.150063676 |
| synovial fibroblasts                          | 0.344554303 |
| synthetic glucocorticoid inhibited expression | 0.142298557 |
| synthetic histone substrate                   | 0.34823511  |
| synthetic mapk phosphopeptides                |             |
| systemic sclerosis patient dermal fibroblasts | 0.268409055 |
| systemic sclerosis patient dermal fibroblasts | 0.268409055 |
| tad                                           | 0.400551292 |
| target protein-binding regions                |             |
| targeted inhibition                           | 0.250157258 |
| targeted pharmacologic inhibition             | 0.230559383 |
| targeting apoptotic programs                  | 0.273377784 |
| t-cell lymphoma jurkat cells                  | 0.026648577 |
| templates                                     | 0.299866466 |
| tendon                                        | 0.319938272 |
| tendon fiber bundles                          | 0.109956853 |
| tendon fibroblast mrna                        | -0.02275211 |
| tendon maturation                             | 0.100435267 |
| tendon phenotype                              |             |
| tendon progenitors                            | 0.02082447  |
| tendon reflexes                               | 0.295548338 |
| tendon stiffness                              | 0.281062394 |
| tendon strength                               | 0.29376399  |
| tendon tissue                                 | 0.130381072 |
| tendon tissues                                | 0.11791171  |
| tendon weakness                               | 0.275395989 |
| tendons                                       | 0.319284989 |
| tensin phosphorylation                        | 0.333899987 |
| term apoptosis                                | 0.312753083 |
| terminal transactivation domain               | 0.367928232 |
| tgf-beta activation                           | 0.375496602 |

|                                                  |             |
|--------------------------------------------------|-------------|
| tgf-beta inhibition                              | 0.307696591 |
| tgf-beta transcription activation                | 0.403330788 |
| therapeutic inhibition                           | 0.253313063 |
| thermal heat                                     | 0.319146173 |
| thymocyte apoptosis                              | 0.309607078 |
| thyroid hormone-dependent transactivation system | 0.272793647 |
| tibialis anterior tendons                        |             |
| tissue remodeling                                | 0.199109155 |
| t-lymphocyte activation                          | 0.361547834 |
| t-lymphotropic                                   | 0.337876423 |
| tonic inhibition                                 | 0.243542477 |
| total protein acetylation                        | 0.43726975  |
| toxic shock                                      | 0.309545224 |
| toxic shock syndrome                             | 0.226687181 |
| trail apoptotic activity                         | 0.308784744 |
| transactivation                                  | 0.415571113 |
| trans-activation                                 | 0.428778429 |
| transactivation abilities                        | 0.413379179 |
| transactivation ability                          | 0.410800889 |
| transactivation activities                       | 0.413233705 |
| transactivation activity                         | 0.429163457 |
| transactivation assay                            | 0.419246987 |
| transactivation assays                           | 0.383190756 |
| transactivation capacity                         | 0.412820876 |
| transactivation domain                           | 0.385202586 |
| trans-activation domain                          |             |
| transactivation domains                          | 0.384288573 |
| transactivation functions                        | 0.375589381 |
| transactivation inhibitory domain                | 0.354910249 |
| transactivation potential                        | 0.409079914 |
| transactivation properties                       | 0.403852288 |
| transactivation studies                          | 0.397706935 |
| transactivation thresholds                       | 0.406414043 |
| transactivation variants                         | 0.353895173 |
| transactivator                                   | 0.372009386 |
| trans-activator                                  | 0.305480878 |
| transactivator activity                          | 0.31079546  |
| transactivator protein                           | 0.173863307 |
| transactivators                                  | 0.407312215 |
| transcription factor creb-binding protein        |             |
| transcription transactivation domain             | 0.26619476  |

|                                                       |             |
|-------------------------------------------------------|-------------|
| transformed fibroblasts                               | 0.312229977 |
| transforming                                          | 0.285527075 |
| transforming abilities                                | 0.285278785 |
| transforming ability                                  | 0.298955691 |
| transforming activities                               | 0.295894227 |
| transforming activity                                 | 0.355953645 |
| transforming agent                                    | 0.282156882 |
| transforming allele                                   | 0.125949475 |
| transforming capacity                                 | 0.286567149 |
| transforming component                                | 0.260571884 |
| transforming dna sequence                             | 0.074393628 |
| transforming effects                                  | 0.283403224 |
| transforming foci                                     | 0.266481744 |
| transforming form                                     | 0.283586178 |
| transforming genes                                    | 0.141100248 |
| transforming growth factor beta superfamily           | 0.143046946 |
| transforming growth factor beta superfamily cytokines | 0.132520797 |
| transforming growth factor-alpha locus                | 0.110634841 |
| transforming growth factor-beta                       | 0.25867449  |
| transforming growth factor-beta                       | 0.25867449  |
| transforming growth factor-beta receptors             | 0.113156945 |
| transforming growth factor-beta receptors             | 0.113156945 |
| transforming growth factor-beta signaling pathway     | 0.199744009 |
| transforming growth factor-beta signaling pathway     | 0.199744009 |
| transforming growth factor-beta superfamily           | 0.23872887  |
| transforming growth factor-beta superfamily           | 0.23872887  |
| transforming mutants                                  |             |
| transforming oncogene                                 | 0.260057431 |
| transforming potential                                | 0.286826789 |
| transforming properties                               | 0.273755097 |
| transforming sequence                                 | 0.257700651 |
| transforming signal                                   | 0.273146763 |
| transforming viruses                                  | 0.255324558 |
| transforms fibroblasts                                | 0.324389281 |
| transient activation                                  | 0.358815371 |
| transient inhibition                                  | 0.281030514 |
| transient phosphorylation                             | 0.337465658 |
| transient topoisomerase inhibition                    | 0.239302233 |
| translation inhibition                                | 0.28879025  |
| translation inhibition activity                       | 0.308059835 |
| translation initiator codon                           | 0.142246755 |

|                                      |              |
|--------------------------------------|--------------|
| translation initiator downstream     | 0.299177471  |
| translational inhibition             | 0.258395711  |
| translocated                         | 0.288840179  |
| translocated allele                  | -0.035490355 |
| translocated chromosome              |              |
| translocated chromosomes             | -0.098310891 |
| translocated c-myc genes             | -0.059907465 |
| translocated derivatives             | 0.049784924  |
| translocated part                    | 0.172308035  |
| translocated segment                 | 0.028806651  |
| transmembrane collagens              | 0.180990698  |
| treatment inhibited secretion        | 0.140800974  |
| trigger apoptosis                    | 0.311176006  |
| triggering apoptosis                 | 0.313060629  |
| trimerization                        | 0.309287908  |
| triple helical collagen              | 0.371739177  |
| triple helical collagen folding      | 0.384671186  |
| tubulin acetylation                  | 0.401458973  |
| tubulin cofactors                    |              |
| tubulin deacetylase                  | 0.257795643  |
| tumor necrosis factor-beta           |              |
| tumor-associated fibroblasts         | 0.302605441  |
| tumor-associated tissue remodeling   | 0.181683069  |
| type ii apoptosis signaling          | 0.331075783  |
| type ii chick embryo collagens       | 0.198566875  |
| type ii procollagen                  | 0.315542281  |
| type iii procollagen                 | 0.320964392  |
| type vi ehlers-danlos syndrome       | 0.113942769  |
| typical apoptotic program            | 0.299356875  |
| typical ccaat box                    | 0.030519765  |
| typical heat-shock elements          | 0.318735006  |
| tyrosine kinase transforming protein | 0.221689496  |
| ubiquitous small heat-shock proteins | 0.305603551  |
| unfolding                            | 0.299526016  |
| unfolding behavior                   |              |
| unfolding protein toxicity           | 0.11946317   |
| unfolding rate                       | 0.064317052  |
| unique connective tissue disorder    | 0.059364332  |
| unique inhibition                    | 0.276937162  |
| universal activation                 | 0.358817153  |
| universal inhibition                 | 0.287046342  |

|                                          |             |
|------------------------------------------|-------------|
| unrelated transactivators                |             |
| upper dermal atrophy                     | 0.097103348 |
| upstream caspases                        | 0.321296955 |
| uterine stromal remodeling               | 0.221679285 |
| v-abl transforming activity              | 0.356349515 |
| vascular ehlers-danlos syndrome          | 0.050239993 |
| vascular remodeling                      | 0.172289057 |
| ventricular end-systolic remodeling      | 0.113711671 |
| ventricular remodeling                   | 0.116623198 |
| vero fibroblasts                         | 0.319861347 |
| vertebral compression fractures          | 0.246689199 |
| vertebral fracture                       | 0.249071861 |
| vertebral fracture cases                 | 0.197875659 |
| vertebral fracture risk                  | 0.045140372 |
| vertebral fractures                      | 0.243452189 |
| vessel remodeling                        | 0.282886636 |
| viral oncoproteins                       |             |
| viral transforming genes                 | 0.170166305 |
| viral transforming proteins              | 0.240216312 |
| virus-induced apoptosis                  | 0.311537404 |
| vitro acetyltransferase                  | 0.431494323 |
| vitro acetyltransferase activity         | 0.431145815 |
| vitro acetyltransferase assay            | 0.435355324 |
| vitro caspase cleavage                   | 0.330841462 |
| vitro inhibition                         | 0.299309257 |
| vitro phosphorylation                    | 0.338363936 |
| vitro phosphorylation sites              | 0.330540666 |
| vitro phosphorylation studies            | 0.330357381 |
| vitro protein-binding                    |             |
| vitro protein-binding assay              |             |
| vitro transactivation                    | 0.422650717 |
| vitro transforming                       | 0.334543014 |
| vivo acetylation capacities              | 0.419927192 |
| vivo acetylation capacity                | 0.417387684 |
| vivo apoptosis program                   | 0.319384423 |
| vivo endothelial cell-specific apoptosis | 0.306400365 |
| vivo inhibited virus binding             | 0.139798291 |
| vpr                                      | 0.376548218 |
| wide palpebral fissures                  | 0.16293985  |
| widespread apoptosis                     | 0.311390522 |
| widespread apoptotic cell death          | 0.236597336 |

|                                    |             |
|------------------------------------|-------------|
| widespread inhibition              | 0.280180857 |
| xi collagens                       | 0.317813698 |
| x-linked amelogenesis imperfecta   | 0.259163596 |
| x-linked recessive hsp             | 0.20698574  |
| yeast histone deacetylase          | 0.268266077 |
| yeast transactivation assay        | 0.164527624 |
| young human diploid fibroblasts    | 0.255947827 |
| young versus senescent fibroblasts | 0.306929284 |
| zap                                | 0.285908049 |
| zap expression library             | 0.055066784 |

**Table S24. *Textrousl*-mediated Individual mode noun-phrase analysis of bPTH(7-34) superconserved dataset.** For each identified noun-phrase the Cosine Similarity score is given.

| <b>Individual: noun-phrases</b>                  | <b>Cosine Similarity</b> |
|--------------------------------------------------|--------------------------|
| insulin resistance                               | 0.059422944              |
| abdominal subcutaneous adipocytes                | 0.01992443               |
| abnormal mitochondria                            | 0.049410181              |
| absent phosphorylation                           | 0.32413618               |
| acidic activation                                | 0.361541431              |
| acidic activation domain                         | 0.358800912              |
| actin filaments anchor                           | -0.042020972             |
| activated extracellular signal-regulated kinases | 0.142371474              |
| activated protein tyrosine kinases               | 0.099834759              |
| activation assay                                 | 0.377901875              |
| activation cascade                               | 0.358063939              |
| activation contraction                           | 0.36441909               |
| activation curves                                | 0.360244811              |
| activation domain                                | 0.361175696              |
| activation energies                              | 0.360373595              |
| activation energy                                | 0.363151478              |
| activation factors                               | 0.366309911              |
| activation mechanism                             | 0.3598018                |
| activation programs                              | 0.3600776                |
| activation reaction                              | 0.360880066              |
| activation segment phosphorylation               | 0.403910359              |
| activation segment phosphorylation               | 0.403910359              |
| activation sites                                 | 0.363686456              |
| activation state                                 | 0.358868743              |
| activation states                                | 0.360235646              |
| active catalytic domain                          | 0.160998043              |
| active chitinase catalytic domain                | 0.161041896              |
| active kinase domain                             | 0.207315246              |
| active protein kinases                           | 0.118024917              |
| active serine hydrolase motif                    | 0.121524268              |
| active site catalytic triad                      | 0.122479286              |
| active site serine                               | 0.220191323              |
| active site serine residue                       | 0.203517934              |
| acute insulin response                           | 0.051739534              |
| adenylate kinases                                | 0.02395248               |
| adipocyte insulin action                         | 0.05024067               |



|                                          |              |
|------------------------------------------|--------------|
| adult mitochondria                       | 0.017858804  |
| aggregated mitochondria                  | 0.111617633  |
| a-kinase anchor                          | 0.128325617  |
| a-kinase anchor                          | 0.128325617  |
| a-kinase anchor protein                  | 0.154166931  |
| a-kinase anchor protein                  | 0.154166931  |
| a-kinase anchor proteins                 |              |
| a-kinase anchor proteins                 | 0.074730251  |
| allergen activation                      | 0.358170494  |
| allosteric kinase inhibitor              | 0.231872302  |
| altered signal transduction              | 0.039702702  |
| aminoglycoside kinases                   | 0.085080774  |
| amino-terminal activation domain         | 0.360715612  |
| amp-activated protein kinase             | 0.216809404  |
| amp-activated protein kinase             |              |
| amp-activated protein kinase cascade     | 0.2222763    |
| amp-activated protein kinase cascade     | 0.2222763    |
| anchor loci                              |              |
| anchor pcr                               | 0.050945521  |
| anchor point                             | 0.083249652  |
| anchor points                            | 0.112808018  |
| antibiotic staurosporine                 | 0.290806038  |
| antiviral signal transduction            | 0.039779322  |
| apoptosis signal transduction pathway    | 0.297223445  |
| apoptosis signal-regulating kinase       | 0.339115412  |
| apoptosome complex                       |              |
| apoptosome formation                     | 0.260292205  |
| apoptotic reagent staurosporine          | 0.324488828  |
| aps kinases                              | 0.048943717  |
| aqueous cytosol                          | 0.12933018   |
| arterial endothelial signal transduction | 0.102847574  |
| astrocyte activation                     | 0.37221367   |
| atp-dependent kinases                    | 0.102732181  |
| atp-dependent phosphorylation            | 0.341982419  |
| autonomic activation                     | 0.357893773  |
| autophagic vacuole formation             | -0.148239088 |
| autophagic vacuole fraction              | -0.165525272 |
| average transduction length              | 0.063062592  |
| basal body temperatures                  | -0.018409591 |
| basal insulin promoter activity          | 0.12583624   |
| basal insulin release                    | 0.055881022  |

|                                                           |              |
|-----------------------------------------------------------|--------------|
| basal kinase activity                                     | 0.207275671  |
| basal phosphorylation                                     | 0.326242602  |
| basic amino acid anchor                                   | -0.055965539 |
| bcr-abl signal transduction                               | 0.046264874  |
| bind phosphopeptides                                      | 0.230731995  |
| bitter transduction                                       | 0.090720924  |
| bitter transduction pathways                              | 0.082732536  |
| body temperatures                                         |              |
| bovine brain cytosol                                      | -0.068254319 |
| bovine cytosol                                            | 0.039516218  |
| bovine heart mitochondria                                 | 0.078202427  |
| bovine liver mitochondria                                 | -0.001119366 |
| brain mitochondria                                        | -0.025261535 |
| broad catalytic cleft                                     | 0.140007394  |
| broad protein kinase inhibitor                            | 0.233127757  |
| brown adipocytes                                          | 0.005381375  |
| calcium-dependent catalytic activity                      | 0.188718268  |
| calcium-dependent serine proteases                        | 0.175061378  |
| calmodulin-dependent serine kinase                        | 0.204901964  |
| camp-dependent activation                                 | 0.384744686  |
| camp-dependent activation                                 | 0.384744686  |
| camp-dependent attenuation                                | 0.178110716  |
| camp-dependent expression                                 | 0.117810478  |
| camp-dependent inhibition                                 | 0.306514733  |
| camp-dependent kinase                                     | 0.195767585  |
| camp-dependent pathway                                    | 0.129839678  |
| camp-dependent phosphorylation                            | 0.323827224  |
| camp-dependent phosphorylation                            | 0.323827224  |
| camp-dependent pka                                        | 0.142501083  |
| camp-dependent pka                                        | 0.142501083  |
| camp-dependent protein kinase                             | 0.199135318  |
| camp-dependent protein kinase activity                    | 0.216690966  |
| camp-dependent protein kinase activity                    | 0.216690966  |
| camp-dependent protein kinase catalytic subunit           | 0.176684667  |
| camp-dependent protein kinase catalytic subunit           | 0.176684667  |
| camp-dependent protein kinase pathway                     | 0.194998199  |
| camp-dependent protein kinase phosphorylation sites       | 0.266664441  |
| camp-dependent protein kinase phosphorylation sites       | 0.266664441  |
| camp-dependent protein kinase serine phosphorylation site | 0.27603149   |
| camp-dependent protein kinase serine phosphorylation site | 0.27603149   |
| camp-dependent protein kinase serine phosphorylation site | 0.27603149   |

|                                                         |             |
|---------------------------------------------------------|-------------|
| camp-dependent protein kinase substrates                | 0.198689955 |
| camp-dependent protein kinase system                    | 0.192103219 |
| camp-dependent protein kinases                          | 0.150460061 |
| camp-dependent protein kinases                          | 0.150460061 |
| camp-dependent protein phosphorylation events           | 0.31390834  |
| camp-dependent regulation                               | 0.076939174 |
| camp-dependent reporter system                          | 0.102279578 |
| camp-dependent serine-threonine protein kinases         | 0.193746632 |
| camp-dependent serine-threonine protein kinases         | 0.193746632 |
| camp-dependent serine-threonine protein kinases         | 0.193746632 |
| camp-dependent signal transduction                      | 0.130690344 |
| camp-dependent signal transduction                      | 0.130690344 |
| camp-dependent signal transduction pathway              | 0.111099185 |
| camp-dependent signal transduction pathway              | 0.111099185 |
| camp-dependent signaling                                | 0.096338347 |
| camp-dependent signaling pathway                        | 0.088731081 |
| camp-dependent thyroid hormone                          |             |
| camp-responsive element-binding protein phosphorylation | 0.376180503 |
| canonical protein-tyrosine kinase catalytic domain      | 0.219241003 |
| canonical protein-tyrosine kinase catalytic domain      | 0.219241003 |
| carbohydrate kinases                                    | 0.0734768   |
| carboxypeptidase catalytic domain                       | 0.10915666  |
| carboxy-terminal activation helix                       | 0.397403887 |
| carboxy-terminal kinase domain                          | 0.207288717 |
| carboxy-terminal phosphorylation sites                  | 0.329401881 |
| carboxy-terminal serine cluster                         | 0.165148722 |
| cardiac mitochondria                                    | 0.113257668 |
| cardiac mitochondrial ultrastructure                    | 0.120367512 |
| casein kinase ii consensus phosphorylation sites        | 0.269831022 |
| casein kinase ii phosphorylation site                   | 0.270131379 |
| casein kinase ii phosphorylation sites                  | 0.267646767 |
| casein kinase phosphorylation sites                     | 0.264586679 |
| casein kinase type ii                                   | 0.220888359 |
| caspase activation                                      | 0.393165646 |
| caspase activation program                              | 0.392539074 |
| catalytic activation                                    | 0.362090611 |
| catalytic activation                                    | 0.362090611 |
| catalytic activities                                    | 0.121533088 |
| catalytic activity                                      | 0.204946972 |
| catalytic asparagine                                    | 0.105778847 |
| catalytic cleavage site                                 | 0.171210493 |

|                                       |             |
|---------------------------------------|-------------|
| catalytic cleft                       | 0.13463826  |
| catalytic competence                  |             |
| catalytic core                        | 0.135549567 |
| catalytic core domain                 | 0.164784249 |
| catalytic core regions                | 0.130323108 |
| catalytic cores                       | 0.103628752 |
| catalytic cysteine domain             | 0.12567042  |
| catalytic domain                      | 0.15451321  |
| catalytic domain fragment             | 0.133032109 |
| catalytic domain motifs               | 0.131674146 |
| catalytic engine                      | 0.104964313 |
| catalytic kinase domain               | 0.207624671 |
| catalytic kinase domain               | 0.207624671 |
| catalytic lys                         | 0.117474643 |
| catalytic lysine                      | 0.232248183 |
| catalytic mechanism                   | 0.158679915 |
| catalytic metalloprotease domain      | 0.162435148 |
| catalytic phosphorylation site        | 0.328626564 |
| catalytic phosphorylation site        | 0.328626564 |
| catalytic regions                     | 0.104502779 |
| catalytic residue                     | 0.121059808 |
| catalytic residues                    | 0.10523032  |
| catalytic serine                      | 0.202327956 |
| catalytic serine                      | 0.202327956 |
| catalytic site                        | 0.123991185 |
| catalytic transduction core           | 0.152520415 |
| catalytic transduction core           | 0.152520415 |
| catalytic tyrosine kinase domain      | 0.180793626 |
| catalytic utilization                 | 0.106185381 |
| cell cytosol                          | 0.041076114 |
| cell division kinases                 | 0.047851588 |
| cellular activation                   | 0.371007365 |
| cellular ceramide content             | 0.222262201 |
| cellular protein kinases              | 0.138765228 |
| cellular signal transduction          | 0.125925581 |
| cellular signal transduction pathways | 0.115044858 |
| central catalytic core domain         | 0.148747362 |
| central catalytic domain              | 0.134799722 |
| central insulin                       |             |
| central serine residue                | 0.190082765 |
| centromeric kinases                   | 0.045790267 |

|                                                          |              |
|----------------------------------------------------------|--------------|
| ceramide catabolism                                      | 0.070378297  |
| ceramide composition                                     | 0.112803636  |
| ceramide content                                         | 0.149842289  |
| ceramide directly induced dna fragmentation              | -0.004712564 |
| ceramide generation                                      | 0.068748316  |
| ceramide homolog                                         | -0.017474359 |
| ceramide hydrolysis                                      | 0.111043212  |
| ceramide kinases                                         | 0.114078223  |
| ceramide kinases                                         | 0.114078223  |
| ceramide metabolism                                      | 0.033167101  |
| ceramide production                                      | 0.083769932  |
| ceramide release                                         | 0.108846099  |
| ceramide storage                                         | 0.097387706  |
| ceramide substrates                                      | 0.133470641  |
| ceramide synthase                                        | 0.026988065  |
| ceramide synthase activity                               | 0.075183449  |
| ceramide synthases                                       | 0.113163549  |
| ceramide transport                                       |              |
| cgmp-dependent cation channels                           |              |
| cgmp-dependent phosphodiesterase                         | 0.070007978  |
| cgmp-dependent phosphorylation                           | 0.329741348  |
| cgmp-dependent phosphorylation                           | 0.329741348  |
| cgmp-dependent protein kinase                            | 0.190829091  |
| cgmp-dependent protein kinase phosphorylation site       | 0.266852669  |
| cgmp-dependent protein kinase phosphorylation site       | 0.266852669  |
| cgmp-dependent protein kinase phosphorylation sites      | 0.264447899  |
| cgmp-dependent protein kinase phosphorylation sites      | 0.264447899  |
| characteristic n-terminal mitochondrial targeting domain | 0.104285176  |
| checkpoint kinases                                       | -0.069816237 |
| chemical activation                                      | 0.364251993  |
| chemoattractant signal transduction                      | 0.033780919  |
| choline kinases                                          | 0.076844262  |
| chondrocyte-specific activation                          | 0.378843192  |
| chromatin activation                                     | 0.396888343  |
| chromatin immunoprecipitation                            | 0.243554426  |
| chromatin immunoprecipitation analyses                   | 0.215730817  |
| chromatin immunoprecipitation analysis                   | 0.226187577  |
| chromatin immunoprecipitation assay                      | 0.25084355   |
| chromatin immunoprecipitation assays                     | 0.235718613  |
| chromatin immunoprecipitation experiments                | 0.229003136  |
| chromatin immunoprecipitation sequence analysis          | 0.199244905  |

|                                                              |              |
|--------------------------------------------------------------|--------------|
| chromatin immunoprecipitation sequencing                     | 0.248343637  |
| chromatin immunoprecipitation studies                        | 0.229256793  |
| chromosome immunoprecipitation experiments                   |              |
| chymotrypsin-like serine proteases                           | 0.180418026  |
| circulating insulin                                          | 0.051265923  |
| c-jun amino-terminal kinases                                 | 0.097295733  |
| c-jun kinases                                                | 0.088989962  |
| c-jun n-terminal kinase activation                           | 0.24960332   |
| c-jun n-terminal kinases                                     | 0.096743688  |
| class ii hdac kinase                                         | 0.206994826  |
| class ii hdac phosphorylation                                | 0.332195679  |
| class iii receptor-type tyrosine kinases                     | 0.045067364  |
| classic activation                                           | 0.361941106  |
| clearing mitochondria                                        | 0.099163691  |
| cold temperatures                                            | -0.027749377 |
| combined kinase inhibition                                   | 0.212393318  |
| commercial insulin stocks                                    | 0.051339242  |
| common catalytic domain                                      | 0.130157694  |
| competitive chromatin immunoprecipitation                    | 0.241181193  |
| complex signal transduction pathways                         | 0.050129199  |
| concomitant activation                                       | 0.361094962  |
| concomitant phosphorylation                                  | 0.329194612  |
| concurrent activation                                        | 0.357988418  |
| conformational activation                                    | 0.394206403  |
| consensus map kinase phosphorylation site                    | 0.256611427  |
| consensus phosphorylation sites                              | 0.327840919  |
| consensus pka site                                           | 0.153429711  |
| consensus tyrosyl kinase phosphorylation site                | 0.271454283  |
| conserved camp-dependent protein kinase phosphorylation site | 0.260581588  |
| conserved camp-dependent protein kinase phosphorylation site | 0.260581588  |
| conserved kinase catalytic domains                           | 0.1794931    |
| conserved n-terminal serine                                  | 0.099178493  |
| conserved protein kinase catalytic domain                    | 0.194233136  |
| conserved serine phosphorylation site                        | 0.314993805  |
| conserved serine phosphorylation sites                       | 0.307092252  |
| conserved tyrosine kinase phosphorylation site               | 0.231913191  |
| constitutive phosphorylation                                 | 0.325819821  |
| control cytosol                                              | 0.042866214  |
| controls tgf-beta activation                                 | 0.368286212  |
| cooperative activation                                       | 0.36701485   |
| core body temperatures                                       | 0.054834482  |

|                                                          |              |
|----------------------------------------------------------|--------------|
| core catalytic domain                                    | 0.164784249  |
| creatine kinase inhibitor                                | 0.231148418  |
| creatine kinases                                         | 0.084618752  |
| critical catalytic residue                               | 0.120881373  |
| critical catalytic residues                              | 0.106744816  |
| critical interacting                                     | 0.149238335  |
| critical phosphorylation site                            | 0.331750312  |
| critical phosphoserine residue                           | 0.128262055  |
| critical serine                                          | 0.223300204  |
| critical serine residues                                 | 0.17326872   |
| critical transduction event                              | 0.096218827  |
| crosslinking immunoprecipitation                         | 0.219034312  |
| cryptic site activation                                  | 0.37016447   |
| c-terminal catalytic core                                | 0.128261682  |
| c-terminal catalytic domain                              | 0.132740745  |
| c-terminal glycosylphosphatidylinositol membrane anchor  | -0.026260604 |
| c-terminal hydrophobic tail anchor characteristic        | 0.062116573  |
| c-terminal kinase catalytic domain                       | 0.20970278   |
| c-terminal kinase catalytic domain                       | 0.20970278   |
| c-terminal membrane anchor                               | -0.013870822 |
| c-terminal phosphorylation site                          | 0.330888195  |
| c-terminal phosphoserine residues                        | 0.093185458  |
| c-terminal protein tyrosine kinase catalytic domain      | 0.185520467  |
| c-terminal serine                                        | 0.184214263  |
| c-terminal serine-threonine kinase domain                | 0.22297692   |
| c-terminal serine-threonine kinase domain                | 0.22297692   |
| cultured adipocytes                                      | 0.089558201  |
| cultured human adipocytes                                | 0.08281749   |
| cultured mouse adipocytes                                | -0.116834091 |
| cyclic amp-dependent inhibition                          | 0.252429293  |
| cyclic amp-dependent protein kinase                      | 0.207632466  |
| cyclic amp-dependent protein kinase                      |              |
| cyclic amp-dependent protein kinase phosphorylation site | 0.270967781  |
| cyclic amp-dependent protein kinase phosphorylation site | 0.270967781  |
| cyclic phosphorylation                                   | 0.336102591  |
| cyclin d-dependent kinases                               | 0.012500723  |
| cyclin-dependent kinase activation                       | 0.247248959  |
| cyclin-dependent kinase inhibitor                        | 0.20718667   |
| cyclin-dependent kinase phosphorylation                  | 0.244302826  |
| cyclin-dependent kinases                                 | 0.045562612  |
| cyclin-dependent protein kinases                         | 0.073883829  |

|                                                                |              |
|----------------------------------------------------------------|--------------|
| cytokine-induced activation                                    | 0.358302274  |
| cytokine-induced phosphorylation                               | 0.330642857  |
| cytoplasmic anchor protein                                     | 0.092171521  |
| cytoplasmic kinases                                            | 0.074655885  |
| cytoplasmic protein-tyrosine kinases                           | 0.119378639  |
| cytoplasmic signal transduction apparatus                      | 0.042334929  |
| cytoplasmic signal transduction pathways                       | 0.05803164   |
| cytoplasmic tyrosine kinases                                   | 0.063472169  |
| cytosol extracts                                               | 0.098849654  |
| cytosol independent                                            | 0.08143766   |
| cytosolic catalytic domain                                     | 0.158694689  |
| cytosolic phosphorylation                                      | 0.334809363  |
| de novo ceramide synthesis                                     | 0.062632305  |
| decreased activation                                           | 0.363984771  |
| decreased catalytic activity                                   | 0.209006086  |
| decreased fasting insulin                                      | 0.054206777  |
| decreased mitochondrial nucleoside diphosphate kinase activity | 0.22530763   |
| decreased mitochondrial nucleoside diphosphate kinase activity | 0.22530763   |
| decreased phosphorylation                                      | 0.3351596    |
| decreased pyruvate kinase activity                             | 0.211897317  |
| defective catalytic activity                                   | 0.128997234  |
| defective mitochondria                                         | 0.01490871   |
| deficient map kinase activation                                | 0.232143984  |
| diacylglycerol kinase catalytic site                           | 0.19329823   |
| diacylglycerol kinases                                         | 0.079397951  |
| differentiated adipocytes                                      | 0.015766428  |
| differentiated mouse adipocytes                                | -0.156700724 |
| differentiated mouse brown adipocytes                          | -0.159600344 |
| direct insulin action                                          | 0.0514925    |
| direct phosphorylation                                         | 0.329600915  |
| direct signal transduction pathway                             | 0.063102756  |
| discrete signal transduction pathways                          | 0.062599685  |
| divergent signal transduction cascade                          | 0.097657078  |
| dna interacting elements                                       | -0.093516779 |
| dna-dependent protein kinase catalytic subunit                 | 0.166546787  |
| dna-dependent protein kinase catalytic subunit activity        | 0.1831325    |
| dna-dependent protein kinases                                  | 0.099229788  |
| dnase activation                                               | 0.362863973  |
| downstream activation                                          | 0.362293632  |
| downstream caspase activation                                  | 0.398189977  |
| downstream insulin signaling proteins                          | 0.074445632  |



|                                                |              |
|------------------------------------------------|--------------|
| downstream insulin targets                     | 0.064210557  |
| downstream regulatory kinases                  | 0.100333482  |
| downstream signal transduction                 | 0.109694966  |
| drosophila anchor protein                      | -0.000951782 |
| drosophila mitochondria                        | -0.010333585 |
| dual phosphorylation                           | 0.322397508  |
| dual-specificity kinases                       | 0.059470499  |
| dynamic insulin release measurements           | 0.055810551  |
| dynamic phosphorylation                        | 0.326758152  |
| dynamic phosphorylation mark                   | 0.327377308  |
| edema factor catalytic core                    | 0.1368684    |
| effect signal transduction                     | 0.087635249  |
| effector caspase activation                    | 0.372183619  |
| electric activation                            | 0.361059956  |
| elevated amp-activated protein kinase activity | 0.231292186  |
| elevated amp-activated protein kinase activity | 0.231292186  |
| elevated ceramide levels                       | 0.016442207  |
| elevated core temperatures                     | 0.081855611  |
| elevated phosphorylation                       | 0.32389167   |
| endogenous ceramide production                 | 0.067814273  |
| endogenous muscle creatine kinase promoter     | 0.237425231  |
| endogenous phosphorylation                     | 0.324576433  |
| energy transduction                            | 0.118486641  |
| enhanced catalytic activity                    | 0.22344991   |
| enhanced insulin action                        | 0.060535106  |
| enhanced insulin secretion                     | 0.050221976  |
| enhanced insulin sensitivity                   | 0.051975273  |
| enhanced insulin signaling                     | 0.075999544  |
| enhanced kinase activity                       | 0.214235205  |
| enhanced phosphorylation                       | 0.335623572  |
| enhanced pka activity                          | 0.184097314  |
| enhanced signal transduction                   | 0.096097717  |
| enos catalytic activity                        | 0.250823733  |
| equivalent serine residue                      | 0.200823228  |
| erbb protein tyrosine kinases                  | 0.078255063  |
| erythrocyte cytosol                            | 0.047668176  |
| erythropoietin receptor-mediated activation    | 0.361025818  |
| eukaryotic cell mitochondria                   | 0.0549796    |
| eukaryotic protein kinases                     | 0.101361489  |
| eukaryotic signal transduction                 | 0.05851057   |
| excess cellular ceramide                       | 0.218094701  |

|                                                                         |              |
|-------------------------------------------------------------------------|--------------|
| excessive activation                                                    | 0.359862489  |
| excessive insulin release                                               | 0.055828684  |
| exogenous insulin                                                       | 0.054504247  |
| extended catalytic site                                                 | 0.117414305  |
| extra serine residue                                                    | 0.198652265  |
| extracellular c-terminal catalytic domain                               | 0.199601854  |
| extracellular regulated kinases                                         | 0.139466835  |
| extracellular signal-regulated kinase activation                        | 0.250981402  |
| extracellular signal-regulated kinase mitogen-activated protein kinases | 0.114444583  |
| extracellular signal-regulated kinases                                  | 0.112904519  |
| extreme insulin resistance                                              | 0.049376583  |
| fetal adipocytes                                                        | -0.005249937 |
| fibroblast mitochondria                                                 | -0.013612981 |
| focal adhesion kinases                                                  | 0.018837268  |
| force activation                                                        | 0.365636102  |
| force transduction                                                      | 0.108149008  |
| forced activation                                                       | 0.362271492  |
| full activation                                                         | 0.359696395  |
| full kinase activity                                                    | 0.206872151  |
| full t-lymphocyte activation                                            | 0.360462615  |
| functional adipocytes                                                   | -0.040469005 |
| functional nerve growth factor signal transduction                      | 0.05464456   |
| functionally critical c-terminal membrane anchor region                 | -0.031461939 |
| functionally interacting proteins                                       | 0.013695234  |
| gastrocnemius muscle                                                    | 0.095717828  |
| gene-specific phosphorylation                                           | 0.329886601  |
| germinal center kinases                                                 | 0.049738723  |
| glucocorticoid activation                                               | 0.379205728  |
| glucosyl ceramide                                                       | 0.185460757  |
| glucosyl ceramide synthesis                                             | 0.121506457  |
| glycosylphosphatidylinositol anchor                                     | 0.018733364  |
| glycosylphosphatidylinositol anchor addition                            | 0.012227978  |
| glycosylphosphatidylinositol anchor biosynthesis                        | -0.105272154 |
| glycosylphosphatidylinositol anchor sequences                           | -0.035092712 |
| glycosylphosphatidylinositol anchor signal sequence                     | -0.009062671 |
| glycosylphosphatidylinositol membrane anchor                            | -0.064433618 |
| granule serine proteases                                                | 0.098962518  |
| growth factor signal transduction                                       | 0.104451267  |
| guanylate kinases                                                       | 0.073769921  |
| hdac catalytic activity                                                 | 0.356807041  |
| heat activation                                                         | 0.479689454  |

|                                                  |              |
|--------------------------------------------------|--------------|
| hela cell cytosol                                | 0.069168692  |
| hela cell mitochondria                           | 0.086738396  |
| hela cell mitochondrial                          | 0.10192545   |
| hela cell mitochondrial fractions                | 0.102553712  |
| herpesvirus thymidine kinase promoter            | 0.225877445  |
| heterologous signal transduction pathways        | 0.048590841  |
| high insulin demand                              | 0.049751015  |
| high mitochondrial activity                      | 0.14711122   |
| high phase separation temperatures               | -0.079175096 |
| high serine                                      | 0.195368039  |
| high temperatures                                | 0.001971171  |
| higher temperatures                              | 0.006914863  |
| highly conserved serine                          | 0.072385608  |
| highly specific protein kinases rhodopsin kinase | 0.174110619  |
| histidine phosphorylation                        | 0.322110899  |
| hiv activation                                   | 0.375939168  |
| hormone-dependent activation                     | 0.364333368  |
| hosphopeptide binding                            | 0.178483358  |
| human adenylate kinases                          | 0.028258488  |
| human adipocytes                                 | 0.030068     |
| human bone marrow cell mitochondria              | 0.053052905  |
| human cyclin-dependent kinases                   | 0.049618142  |
| human deoxyribonucleoside kinases                | 0.08395067   |
| human fibroblast cytosol                         | -0.018288524 |
| human hepatocyte mitochondria                    | 0.10953561   |
| human insulin                                    | 0.05522994   |
| human insulin promoter                           | 0.102723698  |
| human insulin promoter region                    | 0.097995122  |
| human insulin resistance                         | 0.052278377  |
| human liver cytosol                              | -0.00715547  |
| human liver mitochondria                         | 0.012900292  |
| human liver serine dehydratase                   | 0.045426317  |
| human mitochondria                               | 0.081084224  |
| human mitochondrial promoters                    | 0.126313274  |
| human pkc-delta                                  |              |
| human platelet cytosol                           | 0.011725416  |
| human primary adipocytes                         | 0.028685128  |
| human protein kinases                            | 0.104817086  |
| hydrophobic signal anchor sequence               | 0.039823705  |
| hypertrophic adipocytes                          | 0.100082408  |
| immunoprecipitation analyses                     | 0.167974065  |

|                                          |             |
|------------------------------------------|-------------|
| immunoprecipitation analysis             | 0.198158446 |
| immunoprecipitation assay                | 0.258932293 |
| immunoprecipitation assays               | 0.222972784 |
| immunoprecipitation experiments          | 0.221597473 |
| immunoprecipitation studies              | 0.21311684  |
| immunoprecipitation techniques           | 0.257460553 |
| immunoreactive insulin                   | 0.050584507 |
| immunosuppressive drug rapamycin         | 0.174273871 |
| impaired insulin signaling               | 0.060872342 |
| impaired mitochondria                    | 0.043861095 |
| inactivating serine phosphorylation      | 0.328552752 |
| inactivating serine phosphorylation      | 0.328552752 |
| inactive camp-dependent protein kinase   | 0.201032412 |
| inactive catalytic domain                | 0.159081309 |
| increase kinase activity                 | 0.208021746 |
| increased activation                     | 0.368659593 |
| increased basal phosphorylation          | 0.332367323 |
| increased basal pka activity             | 0.186331111 |
| increased fasting insulin                | 0.058490126 |
| increased insulin content                | 0.065076713 |
| increased insulin release                | 0.067804758 |
| increased insulin resistance             | 0.062526363 |
| increased insulin secretion              | 0.053447351 |
| increased insulin sensitivity            | 0.055273553 |
| increased insulin signal transduction    | 0.077782459 |
| increased insulin signal transduction    | 0.077782459 |
| increased kinase activity                | 0.217330461 |
| increased mitochondria                   | 0.148264462 |
| increased mitochondrial                  | 0.123012201 |
| increased phosphorylation                | 0.338039424 |
| increased pka activity                   | 0.18838084  |
| increased serine pathway flux            | 0.184288778 |
| increased temperatures                   | 0.142165744 |
| increased threonine phosphorylation      | 0.324998126 |
| increased whole-body insulin sensitivity | 0.053365262 |
| incubation temperatures                  | 0.162164978 |
| individual adipocytes                    | 0.015322843 |
| individual insulin signaling components  | 0.062770846 |
| individual pka isoforms                  | 0.129440083 |
| individual protein kinases               | 0.103004435 |
| induced phosphorylation                  | 0.348814131 |

|                                                      |             |
|------------------------------------------------------|-------------|
| inducible phosphorylation                            | 0.34563242  |
| inducible phosphorylation site                       | 0.348258191 |
| inhibited activation                                 | 0.377266784 |
| inhibited phosphorylation                            | 0.35558216  |
| inhibiting phosphorylation                           | 0.339050046 |
| insufficient mitochondrial respiration activity      | 0.145713601 |
| insufficient signal transduction                     | 0.065804996 |
| insulin action                                       | 0.050189033 |
| insulin activator factor                             | 0.065398282 |
| insulin antibodies                                   | 0.049925492 |
| insulin assay                                        | 0.066306481 |
| insulin binding                                      | 0.087220651 |
| insulin chicago                                      | 0.051924299 |
| insulin content                                      | 0.051824072 |
| insulin control element-binding transcription factor | 0.163748631 |
| insulin curve                                        | 0.049653096 |
| insulin demand                                       | 0.051912199 |
| insulin dependency                                   | 0.054280451 |
| insulin dependent                                    | 0.052888286 |
| insulin exposure                                     | 0.053028328 |
| insulin expression                                   | 0.055902399 |
| insulin granules                                     | 0.048672055 |
| insulin hypersecretion                               | 0.05004812  |
| insulin hypoglycemia                                 | 0.04961877  |
| insulin induction                                    | 0.064212932 |
| insulin intolerance                                  | 0.050856091 |
| insulin level                                        | 0.050082067 |
| insulin los angeles                                  | 0.050833907 |
| insulin mimetic                                      | 0.054585914 |
| insulin minisatellite                                | 0.050680637 |
| insulin molecule                                     | 0.049147462 |
| insulin processing                                   | 0.049481371 |
| insulin production                                   | 0.050213621 |
| insulin promoter                                     | 0.100363399 |
| insulin promoter activity                            | 0.126436247 |
| insulin promoter variant                             | 0.099097467 |
| insulin release                                      | 0.054532069 |
| insulin resistance                                   | 0.04941253  |
| insulin resistant                                    | 0.053598665 |
| insulin response                                     | 0.057193933 |
| insulin response sequence                            | 0.050691869 |

|                                            |              |
|--------------------------------------------|--------------|
| insulin sensitization                      | 0.052927161  |
| insulin signal transduction                | 0.065160223  |
| insulin signal transduction                | 0.065160223  |
| insulin signaling                          | 0.068454749  |
| insulin signaling pathway                  | 0.070026091  |
| insulin signals                            | 0.04967227   |
| insulin stimulation                        | 0.070505634  |
| insulin target tissues                     | 0.051777206  |
| insulin transcription                      | 0.130452618  |
| insulin treatment                          | 0.067381966  |
| insulin treatments                         | 0.053552157  |
| interacting cells                          | 0.006210023  |
| interacting dna sequences                  | -0.100149561 |
| interacting domain                         | 0.160876844  |
| interacting domains                        | 0.095744272  |
| interacting effects                        | 0.134032958  |
| interacting molecules                      | 0.0511492    |
| interacting partner                        | 0.160920435  |
| interacting partners                       | 0.158735758  |
| interacting pathways                       | 0.119286306  |
| interacting protein                        | 0.144125401  |
| interacting proteins                       | 0.040072108  |
| interacting regions                        | 0.137639592  |
| interacting species                        | 0.086268899  |
| interacting splicing regulator             | -0.014414606 |
| intercellular signal transduction          | 0.037067471  |
| interfacial activation                     | 0.36216506   |
| interfacial membrane anchor                | -0.049854648 |
| interferon-gamma activation site element   | 0.363164197  |
| intracellular catalytic domain             | 0.109664415  |
| intracellular ceramide                     | 0.061045485  |
| intracellular kinases                      | 0.066817389  |
| intracellular protein kinases              | 0.09176426   |
| intracellular protein tyrosine kinases     | 0.074584964  |
| intracellular serine levels                | 0.072195718  |
| intracellular serine proteinase inhibitors | 0.184453005  |
| intracellular signal transduction          | 0.040799127  |
| intracellular signal transduction domain   | 0.085235429  |
| intracellular signal transduction pathway  | 0.04701928   |
| intracellular signal transduction pathways | 0.048142404  |
| intracellular transduction                 | 0.045241047  |

|                                                |              |
|------------------------------------------------|--------------|
| intracellular tyrosine kinase catalytic domain | 0.176053105  |
| intrinsic catalytic activity                   | 0.255880087  |
| intrinsic kinase activity                      | 0.219757084  |
| intrinsic protein kinase activity              | 0.220616356  |
| invariant catalytic lysine                     | 0.184506307  |
| irf activation                                 | 0.378087446  |
| isolated adipocytes                            | -0.001704594 |
| isolated brain cell mitochondria               | -0.019799248 |
| isolated human mitochondria                    | 0.048879052  |
| isolated interacting peptide                   | 0.000481085  |
| isolated mitochondria                          | 0.054602697  |
| isolated muscle mitochondria                   | 0.101413778  |
| isolated n-terminal interacting peptide        | 0.021087247  |
| isolated rat adipocytes                        | -0.010021023 |
| isolated rat heart mitochondria                | 0.025498232  |
| jak kinase activation                          | 0.267639493  |
| jak kinases                                    | 0.093815115  |
| jak tyrosine kinases                           | 0.068522394  |
| janus kinases                                  | 0.085137813  |
| janus protein kinases                          | 0.110223     |
| jurkat cell cytosol                            | 0.182387381  |
| keratinocyte mitochondria                      | 0.082406882  |
| kidney mitochondria                            | 0.02815856   |
| kinase activation                              | 0.264876384  |
| kinase activity                                | 0.206957375  |
| kinase anchor proteins                         | 0.183865088  |
| kinase catalytic domain                        | 0.207624671  |
| kinase catalytic domain                        | 0.207624671  |
| kinase catalytic domains                       | 0.192611179  |
| kinase consensus domain ix                     | 0.226171788  |
| kinase core domain                             | 0.212242623  |
| kinase domain induced osteopetrosis            | 0.212495683  |
| kinase ii phosphorylation                      | 0.268289825  |
| kinase ii phosphorylation sites                | 0.268432768  |
| kinase inhibition                              | 0.216016711  |
| kinase inhibitor                               | 0.231226584  |
| kinase inhibitor segment                       | 0.228020532  |
| kinase inhibitor staurosporine                 | 0.239775114  |
| kinase inhibitor staurosporine                 |              |
| kinase pka                                     | 0.202570809  |
| knockout adipocytes                            | -0.050503398 |

|                                          |              |
|------------------------------------------|--------------|
| knockout altered serine                  |              |
| latent mitochondrial dysfunction         | 0.09674029   |
| leukocyte protein-tyrosine kinase        | 0.213217361  |
| ligand interacting                       | 0.000350326  |
| lipid kinase catalytic domain            | 0.191913124  |
| lipid kinases                            | 0.037188279  |
| liver cytosol                            | -0.018778772 |
| liver mitochondria                       | 0.006353501  |
| local activation                         | 0.361350377  |
| long catalytic domain                    | 0.147795885  |
| long extracellular catalytic domain      | 0.22232244   |
| long n-terminal serine                   | 0.176429493  |
| long serine                              | 0.218888622  |
| long-chain ceramide                      | 0.103115866  |
| low temperatures                         | -0.028593091 |
| lower catalytic activity                 | 0.192669834  |
| lower insulin content                    | 0.051187455  |
| lower insulin response                   | 0.056439592  |
| lower kinase activity                    | 0.206628514  |
| lower temperatures                       | 0.035750264  |
| macrophage cytosol                       | -0.072919583 |
| main phosphorylation domain              | 0.339580282  |
| main pka subunits                        |              |
| major camp-dependent protein kinase site | 0.201063162  |
| major cellular a-kinase substrate        | 0.202764095  |
| major cellular interacting partner       | 0.194400911  |
| major interacting proteins               | 0.031964641  |
| major phosphorylation site               | 0.328625559  |
| major pka phosphorylation site           | 0.271146047  |
| major pka site                           | 0.144928727  |
| major signal transduction systems        | 0.049030384  |
| mammalian mitochondria                   | 0.054099593  |
| mammalian signal transduction            | 0.043216499  |
| map kinase activation                    | 0.246001912  |
| map kinase kinases                       | 0.152569268  |
| map kinase pathway activation            | 0.235637647  |
| map kinase signal transduction pathway   | 0.162617705  |
| map kinases                              | 0.036160469  |
| mapk kinases                             | -0.063872068 |
| mass spectrometry phosphopeptide mapping |              |
| mast kinases                             | 0.056862179  |



|                                             |              |
|---------------------------------------------|--------------|
| mature adipocytes                           | -0.028452852 |
| mature cultured mouse white fat adipocytes  | -0.142524588 |
| maximal activation                          | 0.36344955   |
| maximal catalytic activity                  | 0.20702456   |
| maximal phosphorylation                     | 0.332592141  |
| mechanical transduction                     | 0.109869689  |
| membrane anchor                             | -0.052721454 |
| membrane anchor domain                      | 0.026652756  |
| membrane-associated guanylate kinases       | 0.062398135  |
| membrane-associated serine hydrolase        | 0.098896109  |
| membrane-bound vacuole                      | -0.182889278 |
| mild insulin resistance                     | 0.052592801  |
| mild mitochondrial injury                   | 0.105682295  |
| minimal activation                          | 0.363814194  |
| minimal catalytic domain                    | 0.15810575   |
| mitochondria biogenesis                     | -0.015095757 |
| mitochondria fragmentation                  | 0.135204802  |
| mitochondria localization signal            | -0.002254789 |
| mitochondria marker                         | 0.052084906  |
| mitochondria membrane potential             | -0.010007979 |
| mitochondria mouse cortical neurons         | -0.194395228 |
| mitochondria movements                      | 0.088870629  |
| mitochondria number                         | 0.068424971  |
| mitochondria results                        | 0.090112922  |
| mitochondria targeting signal               | 0.034231489  |
| mitochondria transport                      | -0.013773437 |
| mitochondrial acetyl-coa acetyltransferase  | 0.367679046  |
| mitochondrial activity                      | 0.154005537  |
| mitochondrial activity assay                | 0.176541339  |
| mitochondrial antibody                      | 0.110286783  |
| mitochondrial apoptosis                     | 0.302562211  |
| mitochondrial apoptotic pathway             | 0.219241164  |
| mitochondrial binding site                  | 0.163896513  |
| mitochondrial calcium-binding protein       | 0.110732674  |
| mitochondrial camp-dependent protein kinase | 0.218559086  |
| mitochondrial camp-dependent protein kinase | 0.218559086  |
| mitochondrial camp-dependent protein kinase | 0.218559086  |
| mitochondrial carbonic anhydrase            | 0.104415898  |
| mitochondrial cardiomyopathy                | 0.096606777  |
| mitochondrial carrier protein               | 0.10669319   |
| mitochondrial chaperones                    | 0.201365849  |

|                                                    |             |
|----------------------------------------------------|-------------|
| mitochondrial chaperonin                           | 0.11739141  |
| mitochondrial cleavage site                        | 0.148919484 |
| mitochondrial contact sites                        | 0.102402988 |
| mitochondrial creatine kinase                      | 0.20844492  |
| mitochondrial creatine kinase                      | 0.20844492  |
| mitochondrial cytochrome                           | 0.110615685 |
| mitochondrial cytosolic face                       | 0.104331817 |
| mitochondrial deacetylase                          | 0.290466631 |
| mitochondrial death pathway                        | 0.132304201 |
| mitochondrial death signaling pathway              | 0.112636917 |
| mitochondrial elongation factor ef-tu              | 0.108503899 |
| mitochondrial elongation factor tu                 | 0.106242772 |
| mitochondrial energy production                    | 0.097614809 |
| mitochondrial energy signature                     | 0.103400457 |
| mitochondrial fractions                            | 0.096633874 |
| mitochondrial fragmentation                        | 0.112032177 |
| mitochondrial fragmentation activity               | 0.166911779 |
| mitochondrial fusion factors                       | 0.097339089 |
| mitochondrial glycine cleavage system              | 0.154098446 |
| mitochondrial leakage                              | 0.099045224 |
| mitochondrial light strand promoter                | 0.122087017 |
| mitochondrial marker protein                       | 0.105270428 |
| mitochondrial mass                                 | 0.09703432  |
| mitochondrial matrix                               | 0.253510445 |
| mitochondrial matrix enzyme                        | 0.196139686 |
| mitochondrial matrix protein                       | 0.26128765  |
| mitochondrial matrix soluble fraction              | 0.229864807 |
| mitochondrial matrix space                         | 0.253534397 |
| mitochondrial mechanisms                           | 0.096940099 |
| mitochondrial metalloproteinases                   | 0.187564294 |
| mitochondrial myopathy                             | 0.100418167 |
| mitochondrial oxidative phosphorylation            | 0.284558847 |
| mitochondrial oxidative phosphorylation activities | 0.285998465 |
| mitochondrial oxidative phosphorylation system     | 0.274234939 |
| mitochondrial permeability transition              | 0.107902895 |
| mitochondrial permeability transition induction    | 0.122758679 |
| mitochondrial permeability transition process      | 0.102327904 |
| mitochondrial phosphoprotein profile               | 0.100987653 |
| mitochondrial processing proteases                 | 0.102426395 |
| mitochondrial products                             | 0.097189042 |
| mitochondrial proliferation                        | 0.105509474 |

|                                                |              |
|------------------------------------------------|--------------|
| mitochondrial proteases                        | 0.114907431  |
| mitochondrial protein                          | 0.121670082  |
| mitochondrial protein import                   | 0.096775919  |
| mitochondrial protein quality control          | 0.107747013  |
| mitochondrial protein synthesis                | 0.11631877   |
| mitochondrial protein translation              | 0.127545062  |
| mitochondrial release factor                   | 0.117067372  |
| mitochondrial respiratory activity             | 0.132480968  |
| mitochondrial response                         | 0.099213544  |
| mitochondrial retention                        | 0.101791263  |
| mitochondrial rhodanese                        | 0.102771077  |
| mitochondrial ribosome release factor          | 0.109984643  |
| mitochondrial rupture                          | 0.116960104  |
| mitochondrial staining pattern                 | 0.100905266  |
| mitochondrial transcription                    | 0.177485593  |
| mitochondrial transcription factor             | 0.165553291  |
| mitochondrial transcription termination factor | 0.162178598  |
| mitochondrial translation                      | 0.106206365  |
| mitochondrial translation apparatus            | 0.09742239   |
| mitochondrial translation elongation factor    | 0.111303963  |
| mitochondrial translation elongation factor ts | 0.103789985  |
| mitochondrial translation factor               | 0.124449184  |
| mitochondrial translation release factor       | 0.122846314  |
| mitochondrial translation systems              | 0.099732997  |
| mitochondrial translational activity           | 0.149544838  |
| mitochondrial velocity                         | 0.097455435  |
| mitogen activation induced recruitment         | 0.37219221   |
| mitogen-activated protein kinase kinases       | 0.107714232  |
| mitogen-activated protein kinases              | -0.002369226 |
| mitogenic activation                           | 0.360200901  |
| mitogenic signal transduction                  | 0.090825573  |
| mitotic cytosol                                | -0.077953979 |
| mixed-lineage kinases                          | 0.08841034   |
| monocyte serine esterase variants              | 0.03139781   |
| mouse adipocytes                               |              |
| mouse brain cytosol                            |              |
| mouse cardiac mitochondria                     | -0.028983499 |
| mouse gastrocnemius muscle                     |              |
| mouse kidney mitochondria                      | -0.161452714 |
| mouse liver cytosol                            | -0.169549063 |
| mouse liver mitochondria                       | -0.146487145 |

|                                                 |              |
|-------------------------------------------------|--------------|
| mouse mitochondria                              | -0.158379603 |
| mouse ptdins kinases                            |              |
| m-phase cytosol                                 | 0.097261853  |
| m-phase kinases                                 | 0.07975015   |
| multifunctional protein serine kinase           | 0.208447633  |
| multifunctional protein serine kinase           | 0.208447633  |
| multiple interacting loci                       |              |
| multiple map kinases                            | 0.028136688  |
| multiple phosphorylation                        | 0.322481224  |
| multiple potential serine phosphorylation sites | 0.319541819  |
| multiple protein kinases                        | 0.098077931  |
| multiple serine residues                        | 0.149354648  |
| multiple signal transduction pathways           | 0.054994908  |
| multiple upstream kinases                       | 0.077745471  |
| murine adipocytes                               | -0.113619718 |
| muscle creatine kinase e-box enhancer           | 0.216750646  |
| muscle creatine kinase promoter                 | 0.241056385  |
| muscle insulin resistance                       | 0.069579043  |
| muscle mitochondria                             | 0.12251445   |
| mutant mitochondria                             | -0.135359862 |
| mutant mouse liver mitochondria                 | -0.19967968  |
| mutant yeast mitochondria                       | -0.214476792 |
| mutated kinases                                 | 0.084084365  |
| myocardial mitochondria                         | 0.157145487  |
| myocyte activation                              | 0.386679054  |
| myofibroblast activation                        | 0.382359633  |
| nak kinase activity                             | 0.208823728  |
| neurofilament phosphorylation                   | 0.322039749  |
| neuroimmune activation                          | 0.360232786  |
| neuromuscular signal transduction               |              |
| neuron-specific signal transduction pathway     | 0.048288731  |
| neutral serine proteases                        | 0.160836285  |
| neutrophil cytosol                              | -0.016144651 |
| neutrophil-derived serine proteases             | 0.189606302  |
| nicotinamide riboside kinases                   | 0.09051185   |
| nociceptor activation                           | 0.358910351  |
| nocturnal activation                            | 0.358813502  |
| nonreceptor protein tyrosine kinases            | 0.073283267  |
| nonreceptor type kinases                        | 0.160174215  |
| nonreceptor tyrosine kinases                    | 0.059714488  |
| nonspecific kinases                             | 0.071449432  |

|                                                        |              |
|--------------------------------------------------------|--------------|
| normal catalytic activity                              | 0.162379641  |
| normal human heart mitochondria                        | 0.065221826  |
| normal human insulin                                   | 0.05058681   |
| normal mitochondria                                    | 0.064164576  |
| normal pka activity                                    | 0.166944449  |
| novo ceramide synthesis                                | 0.076872844  |
| novo glucosyl ceramide synthesis                       | 0.075536657  |
| n-terminal catalytic domain                            | 0.138209087  |
| n-terminal catalytic domain characteristic             | 0.130398403  |
| n-terminal membrane anchor                             | -0.006766954 |
| n-terminal mitochondria localization sequence          | 0.004648726  |
| n-terminal mitochondrial leader sequence cleavage site | 0.126579924  |
| n-terminal mitochondrial presequence                   | 0.097666679  |
| n-terminal mitochondrial translocation signal          | 0.143408702  |
| n-terminal serine                                      | 0.183268315  |
| n-terminal serine-threonine domain                     | 0.200697664  |
| n-terminal signal anchor sequence                      | 0.049292728  |
| nucleoside diphosphate kinases                         | 0.061540287  |
| nucleoside monophosphate kinases                       | 0.076521033  |
| n-wasp activation                                      | 0.358563433  |
| observed cellular activation                           | 0.3586404    |
| odorant signal transduction                            | 0.044986908  |
| odorant signal transduction cascade                    | 0.085577977  |
| omental adipocytes                                     | 0.040036812  |
| opsin phosphorylation                                  | 0.331814046  |
| optimum catalytic activity                             | 0.194639711  |
| orderly activation                                     | 0.362675152  |
| pancreatic beta cell-specific rat insulin promoter     | 0.063088521  |
| pancreatic mitochondria                                | 0.017433748  |
| paradoxical activation                                 | 0.360082598  |
| paraoxonase catalytic activity                         | 0.132082197  |
| parasite cytosol                                       | 0.055362266  |
| pathologic phosphorylation                             | 0.329920261  |
| pdgfr activation                                       | 0.370536436  |
| permanent activation                                   | 0.360896761  |
| persistent phosphorylation                             | 0.324687908  |
| phagocytic vacuole                                     | -0.190055107 |
| phorbol ester activation                               | 0.373195419  |
| phorbol myristate acetate activation                   | 0.372003251  |
| phosphatidylinositol kinase domain                     | 0.225160275  |
| phosphoamino acid analysis                             |              |

|                                               |              |
|-----------------------------------------------|--------------|
| phosphoamino acids                            | -0.055474292 |
| phosphoinositide signal transduction cascades | 0.103163213  |
| phosphoinositide signal transduction pathway  | 0.084702559  |
| phospholipase catalytic activity              | 0.113691272  |
| phosphopeptide analogs                        | 0.092667189  |
| phosphorylating rb                            |              |
| phosphorylating tyrosine residues             | 0.06321375   |
| phosphorylation activity                      | 0.352092174  |
| phosphorylation cascade                       | 0.342198255  |
| phosphorylation events                        | 0.325292559  |
| phosphorylation increase                      | 0.32657687   |
| phosphorylation induced huvec migration       | 0.359091433  |
| phosphorylation level                         | 0.325598499  |
| phosphorylation loop                          | 0.327484658  |
| phosphorylation motifs                        | 0.323263375  |
| phosphorylation reaction                      | 0.33082876   |
| phosphorylation reactions                     | 0.328406322  |
| phosphorylation response                      | 0.326054838  |
| phosphorylation sink                          | 0.328026354  |
| phosphorylation site                          | 0.333313726  |
| phosphorylation sites                         | 0.324106503  |
| phosphorylation state                         | 0.327769689  |
| phosphorylation states                        | 0.329531685  |
| phosphorylation status                        | 0.326578403  |
| phosphorylation target                        | 0.330125889  |
| phosphorylation targets                       | 0.32252649   |
| phosphoserine motif                           | 0.010250014  |
| phosphoserine motifs                          | 0.010297743  |
| phosphoserine phosphatase                     | -0.053943932 |
| phosphoserine phosphatase activity            | -0.016445995 |
| phosphoserine phosphatase deficiency          |              |
| phosphoserine residues                        | 0.095081929  |
| phospho-specific antibodies                   |              |
| photochemical transduction                    | 0.088941848  |
| physically remote catalytic sites             | 0.137233652  |
| physiologic activation                        | 0.35928297   |
| physiologic temperatures                      | 0.104397863  |
| pka activity                                  | 0.17309041   |
| pka cascade                                   | 0.156350171  |
| pka catalytic subunit                         | 0.102527921  |
| pka catalytic subunit                         | 0.102527921  |

|                                                            |              |
|------------------------------------------------------------|--------------|
| pka inhibition                                             | 0.199706979  |
| pka pathway                                                | 0.147982903  |
| pka phosphorylation                                        | 0.270560859  |
| pka priming                                                | 0.12710136   |
| pka scaffolding                                            | 0.133044533  |
| pka site                                                   | 0.147859409  |
| pka substrate                                              | 0.154157676  |
| pka substrates                                             | 0.141599869  |
| pka type ii regulatory probe                               | 0.176313497  |
| pka type ii regulatory subunit                             | 0.134343848  |
| pkc-delta activation                                       | 0.39905839   |
| pkc-delta activation                                       | 0.39905839   |
| pkc-epsilon agonist                                        |              |
| pkc-epsilon phosphorylation site                           | 0.340414783  |
| pkc-epsilon phosphorylation site                           | 0.340414783  |
| placental nuclear protein interacting                      | 0.133790364  |
| plasmodium falciparum glycosylphosphatidylinositol anchor  | -0.013344125 |
| polymorphonuclear activation                               | 0.360252811  |
| poor insulin response                                      | 0.058730976  |
| poor phosphorylation                                       | 0.325109872  |
| porcine liver cytosol                                      | -0.020113396 |
| positive signal transduction                               | 0.066006741  |
| posttranslational phosphorylation                          | 0.341833619  |
| potential activation loop phosphorylation motif            | 0.39509917   |
| potential activation loop phosphorylation motif            | 0.39509917   |
| potential c-terminal phosphorylation site                  | 0.329522113  |
| potential cyclin-dependent kinase phosphorylation site     | 0.247764356  |
| potential interacting partner                              | 0.123569907  |
| potential interacting partners                             | 0.119616087  |
| potential membrane anchor segment                          | -0.051336322 |
| potential n-terminal casein kinase ii phosphorylation site | 0.272555891  |
| potential phosphorylation domain                           | 0.339359911  |
| potential phosphorylation site                             | 0.33303626   |
| potential phosphorylation sites                            | 0.323796896  |
| potential serine                                           | 0.208501272  |
| potential serine phosphorylation sites                     | 0.327639234  |
| potential serine phosphorylation sites                     | 0.327639234  |
| potential signal anchor sequence                           | 0.019754622  |
| potential tyrosine kinase phosphorylation site             | 0.238861795  |
| potential tyrosine kinase phosphorylation sites            | 0.23722874   |
| potentiated activation                                     | 0.375084215  |

|                                              |              |
|----------------------------------------------|--------------|
| predominant glucose phosphorylating activity | 0.095597955  |
| predominant glucose phosphorylating enzyme   | 0.009089396  |
| predominant interacting proteins             | 0.038076603  |
| preferred signal transduction mechanism      | 0.098125284  |
| presumed mitochondrial translocation signal  | 0.136989718  |
| presynaptic pka activation                   | 0.259911142  |
| primary adipocytes                           | 0.023396547  |
| primary domain interacting                   | 0.154309435  |
| primary mouse adipocytes                     | -0.158601048 |
| primary phosphorylation                      | 0.327609973  |
| primary signal transduction mechanism        | 0.095195219  |
| primed phosphorylation                       | 0.324507245  |
| principal mitochondrial factor               | 0.117495907  |
| prokaryotic serine beta-lactamases           | 0.201249911  |
| proliferative signal transduction pathways   | 0.061344284  |
| prolonged phosphorylation                    | 0.325547835  |
| promoter activation                          | 0.381756986  |
| protein complex interacting                  | 0.094878222  |
| protein interacting                          | 0.144125401  |
| protein kinase activation                    | 0.264832159  |
| protein kinase activity                      | 0.208751492  |
| protein kinase catalytic                     | 0.194113783  |
| protein kinase catalytic domain              | 0.207733793  |
| protein kinase catalytic domain              | 0.207733793  |
| protein kinase catalytic domains             | 0.19449281   |
| protein kinase catalytic subunit             | 0.168680441  |
| protein kinase inhibitor                     | 0.232087711  |
| protein kinase inhibitor staurosporine       | 0.240095884  |
| protein kinase inhibitor staurosporine       | 0.240095884  |
| protein kinase inhibitors                    | 0.210278144  |
| protein kinase phosphorylation site          | 0.266597386  |
| protein kinases                              | 0.107696923  |
| protein transduction domain                  | 0.150830628  |
| protein tyrosine kinases                     | 0.078736962  |
| protein-tyrosine kinase                      | 0.206889048  |
| protein-tyrosine kinase activity             | 0.22703415   |
| protein-tyrosine kinases                     | 0.126130861  |
| protein-tyrosine phosphorylation             | 0.335079385  |
| proteolytic activation                       | 0.360407243  |
| proteolytic activation site                  | 0.36658698   |
| proximal signal transduction                 | 0.091076786  |



|                                                    |              |
|----------------------------------------------------|--------------|
| ptk activity                                       |              |
| ptp catalytic domain                               | 0.128150984  |
| punctate mitochondria                              | 0.076393917  |
| purified mitochondria                              | 0.103021568  |
| purified rabbit brain cytosol aspartyl             | -0.022784102 |
| radiolabeled insulin                               | 0.049954792  |
| radiolabeled regulatory ii subunit pka             | 0.094945787  |
| radiolabeled serine                                | 0.208391323  |
| rapamycin activation                               | 0.385796945  |
| rapamycin activation                               | 0.385796945  |
| rapamycin administration                           | 0.226672475  |
| rapamycin analog                                   | 0.233445105  |
| rapamycin derivative                               | 0.237826712  |
| rapamycin functions                                | 0.194205663  |
| rapamycin inhibitor                                | 0.313453642  |
| rapamycin signaling                                |              |
| rapamycin treatment                                | 0.277112998  |
| rapid phosphorylation                              | 0.328378869  |
| rapid serine phosphorylation                       | 0.333577442  |
| rapid serine phosphorylation                       | 0.333577442  |
| rat brain cytosol                                  | -0.0392286   |
| rat brown adipose tissue mitochondria              | 0.005688418  |
| rat cerebral cytosol                               | 0.024772043  |
| rat insulin ii promoter                            | 0.096694915  |
| rat insulin promoter                               | 0.090406794  |
| rat liver cytosol                                  | -0.01808657  |
| rat liver mitochondria                             | -0.003392475 |
| rat pancreatic beta-cell insulin promoter enhancer | 0.067695252  |
| rat testis cytosol                                 | -0.002717237 |
| receptor-mediated phosphorylation                  | 0.330942975  |
| receptor-mediated signal transduction              | 0.081289296  |
| receptor-mediated smad activation                  | 0.442403302  |
| reciprocal immunoprecipitation                     | 0.248694311  |
| reciprocal immunoprecipitation analysis            | 0.174163155  |
| recombinant catalytic domain                       | 0.131320282  |
| recombinant c-terminal catalytic domain            | 0.119868874  |
| recombinant pka                                    | 0.140808999  |
| reduced downstream phosphorylation                 | 0.328596392  |
| reduced insulin                                    | 0.049379462  |
| reduced insulin release                            | 0.051642919  |
| reduced insulin signaling                          | 0.066039279  |

|                                              |              |
|----------------------------------------------|--------------|
| reduced mitochondrial translational activity | 0.1362134    |
| reduced rhodopsin transduction activity      | 0.164068445  |
| reduced transduction                         | 0.067277629  |
| reductive activation                         | 0.361868358  |
| regional activation                          | 0.358506268  |
| regulating protein-tyrosine kinases          | 0.140060867  |
| regulatory type ii pka                       | 0.178049739  |
| related kinases                              | 0.071604377  |
| related serine proteases                     | 0.163508558  |
| related stress-activated protein kinases     | 0.089011253  |
| residual catalytic activity                  | 0.182375849  |
| retinal signal transduction                  | 0.050631894  |
| retroviral transduction                      | 0.04961783   |
| reverse signal anchor                        | 0.061252898  |
| reversed insulin resistance                  | 0.053398461  |
| reversible phosphorylation                   | 0.33287412   |
| reversible protein phosphorylation           | 0.323516452  |
| rhodopsin phosphorylation                    | 0.323543723  |
| ribonucleoside diphosphate reductases        |              |
| ribonucleoside diphosphates                  | 0.095080023  |
| ribonucleoside monophosphates                | 0.098857867  |
| rii pka                                      | 0.14004004   |
| rod signal transduction cascade              | 0.090593258  |
| screening rat brain cytosol                  | -0.047022422 |
| selective phosphorylation                    | 0.323842563  |
| self-antigens insulin                        | 0.049449603  |
| sequential activation                        | 0.362831758  |
| sequential immunoprecipitation               | 0.294108466  |
| sequential phosphorylation                   | 0.331658483  |
| serial activation                            | 0.360426128  |
| serine alleles                               | 0.047864601  |
| serine base exchange                         | 0.167852105  |
| serine biosynthesis                          | 0.057114154  |
| serine biosynthesis pathway                  | 0.06591655   |
| serine carboxypeptidases                     | 0.223226858  |
| serine catalytic site                        | 0.198064886  |
| serine catalytic site                        | 0.198064886  |
| serine cluster                               | 0.143651244  |
| serine codon                                 | 0.146185941  |
| serine dehydratase                           | 0.182090815  |
| serine esterase                              | 0.172393903  |

|                                  |             |
|----------------------------------|-------------|
| serine esterase inhibitor        | 0.280172491 |
| serine esterases                 | 0.23178112  |
| serine exchange                  | 0.195892158 |
| serine exchange activity         | 0.264474735 |
| serine hydrolase superfamily     | 0.054751691 |
| serine hydrolases                | 0.195536438 |
| serine hydroxymethyltransferase  | 0.221068985 |
| serine kinase                    | 0.204422552 |
| serine kinase irak               | 0.198772674 |
| serine kinase receptors          | 0.125776046 |
| serine kinases                   | 0.146562933 |
| serine kinases                   | 0.146562933 |
| serine palmitoyltransferase      | 0.211096359 |
| serine peptidases                | 0.215456031 |
| serine phosphorylation           | 0.334975168 |
| serine phosphorylation           | 0.334975168 |
| serine proteases                 | 0.185755766 |
| serine proteinase                | 0.166436294 |
| serine proteinase inhibitor      | 0.251088333 |
| serine proteinase inhibitors     | 0.220694576 |
| serine proteinase plasmin        | 0.02909518  |
| serine proteinases               | 0.171463699 |
| serine racemase                  | 0.211667089 |
| serine recognition site          | 0.156960833 |
| serine residue                   | 0.215396582 |
| serine residues                  | 0.173433552 |
| serine rich                      | 0.220642766 |
| serine stretch                   | 0.231536487 |
| serine strip                     | 0.233472304 |
| serine substitutions             | 0.242701484 |
| serine synthesis                 | 0.182741843 |
| serine synthesis flux            | 0.184009983 |
| serine synthesis pathway         | 0.140361255 |
| serine transmembrane protein     | 0.120384802 |
| serine uptake                    | 0.060317161 |
| serine-threonine kinase          | 0.202977791 |
| serine-threonine kinase activity | 0.223461643 |
| serine-threonine kinase activity | 0.223461643 |
| serine-threonine kinase domain   | 0.220253862 |
| serine-threonine kinase domain   | 0.220253862 |
| serine-threonine kinases         | 0.144104206 |

|                                              |              |
|----------------------------------------------|--------------|
| serine-threonine kinases                     |              |
| serine-threonine protein kinase              | 0.206278475  |
| serine-threonine protein kinases             | 0.157799847  |
| serine-threonine protein kinases             | 0.157799847  |
| signal anchor                                | 0.062197097  |
| signal transduction                          | 0.066605488  |
| signal transduction adaptor downstream       | 0.07963101   |
| signal transduction analysis                 | 0.045974334  |
| signal transduction assays                   | 0.106715642  |
| signal transduction cascade                  | 0.105632013  |
| signal transduction cascades                 | 0.073570131  |
| signal transduction component                | 0.035166222  |
| signal transduction components               | 0.043724738  |
| signal transduction downstream               | 0.109694966  |
| signal transduction events                   | 0.063589709  |
| signal transduction machinery                | 0.068029789  |
| signal transduction mechanisms               | 0.070689265  |
| signal transduction molecules                | 0.044985602  |
| signal transduction motifs                   | 0.056066158  |
| signal transduction pathway                  | 0.061733137  |
| signal transduction pathway downstream       | 0.088636441  |
| signal transduction pathways                 | 0.06878697   |
| signal transduction processes                | 0.060756663  |
| signal transduction protein                  | 0.105175692  |
| signal transduction repressor                | 0.056182368  |
| single catalytic domain                      | 0.103559313  |
| single potential serine phosphorylation site | 0.321045751  |
| single serine phosphorylation site           | 0.322047046  |
| single serine phosphorylation site           | 0.322047046  |
| single serine residue                        | 0.144957442  |
| siRNA reduced phosphorylation                | 0.342835938  |
| sirtuin catalytic domain                     | 0.151588603  |
| skeletal muscle insulin action               | 0.08301788   |
| skeletal muscle mitochondria                 | 0.124952215  |
| skeletal muscle transduction                 | 0.12361429   |
| smad activation                              | 0.457504988  |
| smad anchor                                  | 0.425498748  |
| soluble catalytic domain                     | 0.104311461  |
| specific immunoprecipitation                 | 0.253782757  |
| specific mapk kinases                        | -0.061287128 |
| specific phosphorylation                     | 0.329827869  |

|                                               |              |
|-----------------------------------------------|--------------|
| specific phosphorylation events               | 0.324901485  |
| specific phosphoserine                        | 0.097820509  |
| specific protein kinase inhibitors            | 0.210246292  |
| specific protein tyrosine kinases             | 0.07997907   |
| specific serine residue                       | 0.204098488  |
| specific serine residues                      | 0.168368445  |
| sperm mitochondria                            | 0.019109621  |
| s-phase checkpoint kinases                    | -0.080652553 |
| sphingolipid metabolite ceramide              | 0.04899983   |
| sphingosine kinases                           | 0.091272254  |
| spinal cord mitochondria                      | -0.04469896  |
| spinal mitochondria                           | -0.020208317 |
| split catalytic domain                        | 0.149784569  |
| srebp activation                              | 0.37633012   |
| stabilizing anchor                            | 0.091939677  |
| staurosporine treatment                       | 0.262797129  |
| steroid hormone signal transduction           | 0.043566847  |
| stimulated sapk phosphorylation               | 0.339563874  |
| stimulation induced phosphorylation           | 0.343680374  |
| stress activation                             | 0.367287811  |
| stress-activated protein kinases              | 0.097397269  |
| stress-activated signal transduction pathways | 0.063789822  |
| structural abnormal mitochondria              | 0.026575135  |
| subcutaneous adipocytes                       | 0.021478338  |
| subfragment cdna probes                       |              |
| substituted serine                            | 0.225909588  |
| substrate phosphorylation                     | 0.324953363  |
| subtilisin-like catalytic domain              | 0.150002787  |
| sugar kinases                                 | 0.076256465  |
| suppressing activation                        | 0.357956543  |
| sustained phosphorylation                     | 0.329236314  |
| synaptic cytosol                              | -0.13318146  |
| synthetic mapk phosphopeptides                |              |
| taste transduction                            | 0.03928497   |
| telomerase anchor site                        | -0.028633793 |
| tensin phosphorylation                        | 0.333899987  |
| tgf-beta activation                           | 0.375496602  |
| tgf-beta signal transduction                  | 0.284529045  |
| tgf-beta transcription activation             | 0.403330788  |
| thymidine kinase promoter                     | 0.224336179  |
| t-lymphocyte activation                       | 0.361547834  |

|                                                 |              |
|-------------------------------------------------|--------------|
| t-lymphocyte signal transduction                | 0.068143776  |
| total cellular pantothenate kinase activity     | 0.215964041  |
| total serine exchange activity                  | 0.252973357  |
| transduction apparatus                          | 0.072335413  |
| transduction efficiency                         | 0.069901376  |
| transduction elements                           | 0.071460615  |
| transduction pathway                            | 0.069841368  |
| transduction pathways                           | 0.08443221   |
| transduction processes                          | 0.081407503  |
| transduction region                             | 0.060965074  |
| transduction studies                            | 0.067913685  |
| transient activation                            | 0.358815371  |
| transient phosphorylation                       | 0.337465658  |
| translational control couples insulin synthesis | 0.049493637  |
| transmembrane anchor                            | -0.025765649 |
| triggered mitochondrial swelling                | 0.104536969  |
| tumor cytosol                                   | -0.012829007 |
| type ii camp-dependent protein kinase           | 0.230601629  |
| type ii camp-dependent protein kinase           | 0.230601629  |
| type ii pka anchor                              | 0.189998822  |
| type ii pka anchor                              | 0.189998822  |
| type ii serine proteinases                      | 0.2182492    |
| typical catalytic activity                      | 0.189835594  |
| typical mitochondria targeting presequence      | 0.001430764  |
| typical mitochondria targeting sequence         | -0.013642051 |
| typical serine proteinase                       | 0.151995335  |
| tyrosine kinase catalytic domain                | 0.180793626  |
| tyrosine kinase domain activation loop          | 0.24193171   |
| tyrosine kinase phosphorylation motif           | 0.234256084  |
| tyrosine kinase phosphorylation site            | 0.238563878  |
| tyrosine kinase transforming protein            | 0.221689496  |
| tyrosine kinases                                | 0.064889708  |
| tyrosine protein kinases                        | 0.078736962  |
| tyrosine-specific protein kinase activity       | 0.207731717  |
| tyrosine-specific protein kinases               | 0.104540518  |
| ubiquitous mitochondrial                        | 0.096618412  |
| udp-galactose ceramide galactosyltransferase    | 0.176012847  |
| udp-glucose ceramide glucosyltransferase        | 0.137307903  |
| unique serine residue                           | 0.188289719  |
| unique signal transduction pathways             | 0.061222237  |
| unique t-cell tyrosine kinases                  | 0.032203066  |

|                                                       |              |
|-------------------------------------------------------|--------------|
| universal activation                                  | 0.358817153  |
| upstream kinases                                      | 0.087966448  |
| usual serine residue                                  | 0.209858501  |
| v-abl transforming activity                           |              |
| vacuole characteristics                               | -0.230258347 |
| vacuole development                                   |              |
| vacuole formation                                     | -0.17005906  |
| vacuole membranes                                     | -0.169854141 |
| vacuole sorting protein                               | -0.047676012 |
| variant insulin                                       | 0.051184329  |
| vertebrate mitochondria                               | 0.055048763  |
| visual signal transduction                            | 0.064944916  |
| vitro catalytic activities                            | 0.187593873  |
| vitro immunoprecipitation studies                     | 0.234361136  |
| vitro kinase activity                                 | 0.222593306  |
| vitro kinase assay                                    | 0.212908873  |
| vitro kinase assay results                            | 0.211307919  |
| vitro mitochondrial import experiments                | 0.110712486  |
| vitro mitochondrial transcription reaction            | 0.195661649  |
| vitro phosphorylation                                 | 0.338363936  |
| vitro phosphorylation sites                           | 0.330540666  |
| vitro phosphorylation studies                         | 0.330357381  |
| vitro protein kinase activity                         | 0.221898912  |
| vivo ceramide metabolism                              | 0.078840721  |
| vivo immunoprecipitation                              | 0.19029879   |
| vivo immunoprecipitation experiments                  | 0.166337324  |
| vivo insulin action                                   | 0.066524353  |
| white adipocytes                                      | 0.006995644  |
| yeast mitochondria                                    | -0.135938456 |
| yeast mitogen-activated protein kinase kinase kinases | 0.116580179  |

**Table S25. Word counts of Individual mode ‘dismantled’ noun-phrases from the bPTH(7-34) superconserved dataset.** For each identified word the number of times the specific word occurred in the list of dismantled noun-phrases from *Textrous!* Individual processing is given. Word count scores were generated from the Wordle-sourced cloud.

| <b>Individual: Dismantled</b> | <b>Word Count</b> |
|-------------------------------|-------------------|
| kinase                        | 174               |
| phosphorylation               | 151               |
| protein                       | 128               |
| serine                        | 124               |
| activation                    | 117               |
| catalytic                     | 112               |
| transduction                  | 105               |
| mitochondrial                 | 104               |
| kinases                       | 102               |
| insulin                       | 102               |
| signal                        | 95                |
| dependent                     | 80                |
| domain                        | 70                |
| activity                      | 66                |
| mitochondria                  | 65                |
| site                          | 54                |
| camp                          | 49                |
| anchor                        | 42                |
| terminal                      | 40                |
| tyrosine                      | 36                |
| pka                           | 33                |
| ceramide                      | 33                |
| interacting                   | 30                |
| cytosol                       | 30                |
| immunoprecipitation           | 26                |
| adipocytes                    | 26                |
| human                         | 24                |
| pathway                       | 23                |
| sites                         | 21                |
| c                             | 21                |
| potential                     | 20                |
| increased                     | 20                |
| ii                            | 19                |
| n                             | 18                |



|               |    |
|---------------|----|
| threonine     | 17 |
| specific      | 17 |
| promoter      | 16 |
| mouse         | 16 |
| factor        | 16 |
| activated     | 15 |
| pathways      | 14 |
| inhibitor     | 14 |
| temperatures  | 13 |
| rat           | 13 |
| membrane      | 13 |
| intracellular | 13 |
| cell          | 13 |
| residue       | 12 |
| liver         | 12 |
| core          | 12 |
| vitro         | 11 |
| type          | 11 |
| signaling     | 11 |
| muscle        | 11 |
| chromatin     | 11 |
| amp           | 11 |
| release       | 10 |
| rapamycin     | 10 |
| downstream    | 10 |
| cellular      | 10 |
| vacuole       | 9  |
| synthesis     | 9  |
| subunit       | 9  |
| sequence      | 9  |
| residues      | 9  |
| proteases     | 9  |
| phosphoserine | 9  |
| isolated      | 9  |
| enhanced      | 9  |
| critical      | 9  |
| conserved     | 9  |
| cgmp          | 9  |
| cascade       | 9  |
| translation   | 8  |
| resistance    | 8  |

|                              |   |
|------------------------------|---|
| reduced                      | 8 |
| proteins                     | 8 |
| multiple                     | 8 |
| map                          | 8 |
| major                        | 8 |
| induced                      | 8 |
| glycosylphosphatidylinositol | 8 |
| cyclin                       | 8 |
| active                       | 8 |
| transcription                | 7 |
| staurosporine                | 7 |
| response                     | 7 |
| extracellular                | 7 |
| decreased                    | 7 |
| creatine                     | 7 |
| brain                        | 7 |
| beta                         | 7 |
| basal                        | 7 |
| assay                        | 7 |
| a                            | 7 |
| proteinase                   | 6 |
| primary                      | 6 |
| pkc                          | 6 |
| dna                          | 6 |
| cytoplasmic                  | 6 |
| cyclic                       | 6 |
| consensus                    | 6 |
| casein                       | 6 |
| binding                      | 6 |
| analysis                     | 6 |
| action                       | 6 |
| studies                      | 5 |
| single                       | 5 |
| regulatory                   | 5 |
| regulated                    | 5 |
| receptor                     | 5 |
| normal                       | 5 |
| motif                        | 5 |
| mitogen                      | 5 |
| matrix                       | 5 |
| lower                        | 5 |

|                 |   |
|-----------------|---|
| long            | 5 |
| inhibition      | 5 |
| high            | 5 |
| experiments     | 5 |
| elevated        | 5 |
| content         | 5 |
| vivo            | 4 |
| typical         | 4 |
| tgf             | 4 |
| targeting       | 4 |
| t               | 4 |
| system          | 4 |
| stress          | 4 |
| segment         | 4 |
| production      | 4 |
| phosphorylating | 4 |
| phase           | 4 |
| nucleoside      | 4 |
| motifs          | 4 |
| mediated        | 4 |
| mechanism       | 4 |
| loop            | 4 |
| jun             | 4 |
| inhibitors      | 4 |
| individual      | 4 |
| hela            | 4 |
| fragmentation   | 4 |
| exchange        | 4 |
| events          | 4 |
| energy          | 4 |
| elongation      | 4 |
| domains         | 4 |
| diphosphate     | 4 |
| cultured        | 4 |
| control         | 4 |
| cleavage        | 4 |
| central         | 4 |
| caspase         | 4 |
| carboxy         | 4 |
| bovine          | 4 |
| body            | 4 |

|                |   |
|----------------|---|
| yeast          | 3 |
| unique         | 3 |
| treatment      | 3 |
| translational  | 3 |
| transition     | 3 |
| substrates     | 3 |
| substrate      | 3 |
| smad           | 3 |
| skeletal       | 3 |
| sequential     | 3 |
| sensitivity    | 3 |
| ribonucleoside | 3 |
| rhodopsin      | 3 |
| related        | 3 |
| regions        | 3 |
| region         | 3 |
| recombinant    | 3 |
| reaction       | 3 |
| rapid          | 3 |
| radiolabeled   | 3 |
| predominant    | 3 |
| phosphatase    | 3 |
| permeability   | 3 |
| partner        | 3 |
| pancreatic     | 3 |
| oxidative      | 3 |
| novo           | 3 |
| nonreceptor    | 3 |
| mutant         | 3 |
| maximal        | 3 |
| mapk           | 3 |
| lymphocyte     | 3 |
| jak            | 3 |
| intrinsic      | 3 |
| hydrolase      | 3 |
| hormone        | 3 |
| heart          | 3 |
| hdac           | 3 |
| glucosyl       | 3 |
| glucose        | 3 |
| full           | 3 |

|                |   |
|----------------|---|
| formation      | 3 |
| eukaryotic     | 3 |
| esterase       | 3 |
| epsilon        | 3 |
| endogenous     | 3 |
| element        | 3 |
| dynamic        | 3 |
| direct         | 3 |
| differentiated | 3 |
| delta          | 3 |
| cytosolic      | 3 |
| complex        | 3 |
| class          | 3 |
| characteristic | 3 |
| cardiac        | 3 |
| calcium        | 3 |
| brown          | 3 |
| biosynthesis   | 3 |
| assays         | 3 |
| apparatus      | 3 |
| apoptosis      | 3 |
| amino          | 3 |
| activities     | 3 |
| white          | 2 |
| variant        | 2 |
| upstream       | 2 |
| udp            | 2 |
| tu             | 2 |
| transport      | 2 |
| transmembrane  | 2 |
| translocation  | 2 |
| transient      | 2 |
| transforming   | 2 |
| total          | 2 |
| thymidine      | 2 |
| targets        | 2 |
| target         | 2 |
| systems        | 2 |
| synthase       | 2 |
| subcutaneous   | 2 |
| stimulation    | 2 |

|                  |   |
|------------------|---|
| states           | 2 |
| state            | 2 |
| spinal           | 2 |
| soluble          | 2 |
| sequences        | 2 |
| secretion        | 2 |
| reversible       | 2 |
| results          | 2 |
| regulating       | 2 |
| reciprocal       | 2 |
| purified         | 2 |
| proteolytic      | 2 |
| proteinases      | 2 |
| processing       | 2 |
| processes        | 2 |
| presequence      | 2 |
| poor             | 2 |
| physiologic      | 2 |
| phosphopeptides  | 2 |
| phosphopeptide   | 2 |
| phosphoinositide | 2 |
| phosphoamino     | 2 |
| phorbol          | 2 |
| peptide          | 2 |
| partners         | 2 |
| odorant          | 2 |
| neutrophil       | 2 |
| multifunctional  | 2 |
| molecules        | 2 |
| mitogenic        | 2 |
| minimal          | 2 |
| mild             | 2 |
| metabolism       | 2 |
| mechanisms       | 2 |
| mature           | 2 |
| mass             | 2 |
| marker           | 2 |
| mammalian        | 2 |
| main             | 2 |
| m                | 2 |
| lysine           | 2 |

|                |   |
|----------------|---|
| loci           | 2 |
| localization   | 2 |
| lipid          | 2 |
| like           | 2 |
| levels         | 2 |
| level          | 2 |
| knockout       | 2 |
| kidney         | 2 |
| janus          | 2 |
| interfacial    | 2 |
| insufficient   | 2 |
| inhibited      | 2 |
| induction      | 2 |
| inducible      | 2 |
| increase       | 2 |
| inactive       | 2 |
| inactivating   | 2 |
| import         | 2 |
| impaired       | 2 |
| hydrophobic    | 2 |
| highly         | 2 |
| guanylate      | 2 |
| growth         | 2 |
| gastrocnemius  | 2 |
| functionally   | 2 |
| functional     | 2 |
| fractions      | 2 |
| fraction       | 2 |
| force          | 2 |
| flux           | 2 |
| fibroblast     | 2 |
| fasting        | 2 |
| factors        | 2 |
| expression     | 2 |
| excessive      | 2 |
| enzyme         | 2 |
| enhancer       | 2 |
| elements       | 2 |
| dual           | 2 |
| drosophila     | 2 |
| diacylglycerol | 2 |

|                |   |
|----------------|---|
| demand         | 2 |
| dehydratase    | 2 |
| defective      | 2 |
| death          | 2 |
| cytokine       | 2 |
| concomitant    | 2 |
| components     | 2 |
| cluster        | 2 |
| cleft          | 2 |
| checkpoint     | 2 |
| cascades       | 2 |
| canonical      | 2 |
| broad          | 2 |
| bitter         | 2 |
| autophagic     | 2 |
| atp            | 2 |
| associated     | 2 |
| apoptotic      | 2 |
| apoptosome     | 2 |
| antibodies     | 2 |
| analyses       | 2 |
| altered        | 2 |
| adenylate      | 2 |
| acidic         | 2 |
| acid           | 2 |
| abnormal       | 2 |
| abl            | 2 |
| whole          | 1 |
| wasp           | 1 |
| visual         | 1 |
| vertebrate     | 1 |
| velocity       | 1 |
| variants       | 1 |
| v              | 1 |
| utilization    | 1 |
| usual          | 1 |
| uptake         | 1 |
| universal      | 1 |
| ultrastructure | 1 |
| ubiquitous     | 1 |
| tyrosyl        | 1 |



|               |   |
|---------------|---|
| tumor         | 1 |
| ts            | 1 |
| triggered     | 1 |
| triad         | 1 |
| treatments    | 1 |
| tissues       | 1 |
| tissue        | 1 |
| thyroid       | 1 |
| testis        | 1 |
| termination   | 1 |
| tensin        | 1 |
| telomerase    | 1 |
| techniques    | 1 |
| taste         | 1 |
| tail          | 1 |
| synthetic     | 1 |
| synthases     | 1 |
| synaptic      | 1 |
| swelling      | 1 |
| sustained     | 1 |
| suppressing   | 1 |
| superfamily   | 1 |
| sugar         | 1 |
| subunits      | 1 |
| subtilisin    | 1 |
| substitutions | 1 |
| substituted   | 1 |
| subfragment   | 1 |
| structural    | 1 |
| strip         | 1 |
| stretch       | 1 |
| strand        | 1 |
| storage       | 1 |
| stocks        | 1 |
| stimulated    | 1 |
| steroid       | 1 |
| status        | 1 |
| staining      | 1 |
| stabilizing   | 1 |
| srebp         | 1 |
| split         | 1 |

|               |   |
|---------------|---|
| splicing      | 1 |
| sphingosine   | 1 |
| sphingolipid  | 1 |
| sperm         | 1 |
| spectrometry  | 1 |
| specificity   | 1 |
| species       | 1 |
| space         | 1 |
| sorting       | 1 |
| sirtuin       | 1 |
| siRNA         | 1 |
| sink          | 1 |
| signature     | 1 |
| signals       | 1 |
| serial        | 1 |
| sequencing    | 1 |
| separation    | 1 |
| sensitization | 1 |
| self          | 1 |
| selective     | 1 |
| screening     | 1 |
| scaffolding   | 1 |
| sapK          | 1 |
| s             | 1 |
| rupture       | 1 |
| rod           | 1 |
| rii           | 1 |
| rich          | 1 |
| ribosome      | 1 |
| riboside      | 1 |
| rhodanese     | 1 |
| reversed      | 1 |
| reverse       | 1 |
| retroviral    | 1 |
| retinal       | 1 |
| retention     | 1 |
| responsive    | 1 |
| respiratory   | 1 |
| respiration   | 1 |
| resistant     | 1 |
| residual      | 1 |

|               |   |
|---------------|---|
| repressor     | 1 |
| reporter      | 1 |
| remote        | 1 |
| regulator     | 1 |
| regulation    | 1 |
| regional      | 1 |
| reductive     | 1 |
| reductases    | 1 |
| recruitment   | 1 |
| recognition   | 1 |
| receptors     | 1 |
| reagent       | 1 |
| reactions     | 1 |
| rb            | 1 |
| racemase      | 1 |
| rabbit        | 1 |
| quality       | 1 |
| pyruvate      | 1 |
| punctate      | 1 |
| ptp           | 1 |
| ptk           | 1 |
| ptdins        | 1 |
| proximal      | 1 |
| promoters     | 1 |
| prolonged     | 1 |
| proliferative | 1 |
| proliferation | 1 |
| prokaryotic   | 1 |
| programs      | 1 |
| program       | 1 |
| profile       | 1 |
| products      | 1 |
| process       | 1 |
| probes        | 1 |
| probe         | 1 |
| principal     | 1 |
| priming       | 1 |
| primed        | 1 |
| presynaptic   | 1 |
| presumed      | 1 |
| preferred     | 1 |

|                      |   |
|----------------------|---|
| potentiated          | 1 |
| posttranslational    | 1 |
| positive             | 1 |
| porcine              | 1 |
| polymorphonuclear    | 1 |
| points               | 1 |
| point                | 1 |
| platelet             | 1 |
| plasmodium           | 1 |
| plasmin              | 1 |
| placental            | 1 |
| physically           | 1 |
| photochemical        | 1 |
| phosphoprotein       | 1 |
| phospholipase        | 1 |
| phosphodiesterase    | 1 |
| phospho              | 1 |
| phosphatidylinositol | 1 |
| phagocytic           | 1 |
| persistent           | 1 |
| permanent            | 1 |
| peptidases           | 1 |
| pdgfr                | 1 |
| pcr                  | 1 |
| pattern              | 1 |
| pathologic           | 1 |
| parasite             | 1 |
| paraoxonase          | 1 |
| paradoxical          | 1 |
| pantothenate         | 1 |
| palmitoyltransferase | 1 |
| osteopetrosis        | 1 |
| orderly              | 1 |
| optimum              | 1 |
| opsin                | 1 |
| omental              | 1 |
| observed             | 1 |
| number               | 1 |
| nuclear              | 1 |
| nonspecific          | 1 |
| nocturnal            | 1 |

|                    |   |
|--------------------|---|
| nociceptor         | 1 |
| nicotinamide       | 1 |
| neutral            | 1 |
| neurons            | 1 |
| neuron             | 1 |
| neuromuscular      | 1 |
| neuroimmune        | 1 |
| neurofilament      | 1 |
| nerve              | 1 |
| nak                | 1 |
| myristate          | 1 |
| myopathy           | 1 |
| myofibroblast      | 1 |
| myocyte            | 1 |
| myocardial         | 1 |
| mutated            | 1 |
| murine             | 1 |
| movements          | 1 |
| monophosphates     | 1 |
| monophosphate      | 1 |
| monocyte           | 1 |
| molecule           | 1 |
| mixed              | 1 |
| mitotic            | 1 |
| minisatellite      | 1 |
| mimetic            | 1 |
| migration          | 1 |
| metalloproteinases | 1 |
| metalloprotease    | 1 |
| metabolite         | 1 |
| membranes          | 1 |
| mechanical         | 1 |
| measurements       | 1 |
| mast               | 1 |
| marrow             | 1 |
| mark               | 1 |
| mapping            | 1 |
| macrophage         | 1 |
| machinery          | 1 |
| lys                | 1 |
| low                | 1 |

|                          |   |
|--------------------------|---|
| los                      | 1 |
| local                    | 1 |
| lineage                  | 1 |
| light                    | 1 |
| ligand                   | 1 |
| leukocyte                | 1 |
| length                   | 1 |
| leakage                  | 1 |
| leader                   | 1 |
| latent                   | 1 |
| lactamases               | 1 |
| keratinocyte             | 1 |
| jurkat                   | 1 |
| ix                       | 1 |
| isoforms                 | 1 |
| irf                      | 1 |
| irak                     | 1 |
| invariant                | 1 |
| intolerance              | 1 |
| interferon               | 1 |
| intercellular            | 1 |
| injury                   | 1 |
| inhibiting               | 1 |
| independent              | 1 |
| incubation               | 1 |
| immunosuppressive        | 1 |
| immunoreactive           | 1 |
| iii                      | 1 |
| hypoglycemia             | 1 |
| hypertrophic             | 1 |
| hypersecretion           | 1 |
| hydroxymethyltransferase | 1 |
| hydrolysis               | 1 |
| hydrolases               | 1 |
| huvec                    | 1 |
| hosphopeptide            | 1 |
| homolog                  | 1 |
| hiv                      | 1 |
| histidine                | 1 |
| higher                   | 1 |
| heterologous             | 1 |

|                       |   |
|-----------------------|---|
| herpesvirus           | 1 |
| hepatocyte            | 1 |
| helix                 | 1 |
| heat                  | 1 |
| granules              | 1 |
| granule               | 1 |
| glycine               | 1 |
| glucosyltransferase   | 1 |
| glucocorticoid        | 1 |
| germinal              | 1 |
| generation            | 1 |
| gene                  | 1 |
| gamma                 | 1 |
| galactosyltransferase | 1 |
| galactose             | 1 |
| fusion                | 1 |
| functions             | 1 |
| fragment              | 1 |
| forced                | 1 |
| focal                 | 1 |
| filaments             | 1 |
| fetal                 | 1 |
| fat                   | 1 |
| falciparum            | 1 |
| face                  | 1 |
| extreme               | 1 |
| extracts              | 1 |
| extra                 | 1 |
| extended              | 1 |
| exposure              | 1 |
| exogenous             | 1 |
| excess                | 1 |
| event                 | 1 |
| esterases             | 1 |
| ester                 | 1 |
| erythropoietin        | 1 |
| erythrocyte           | 1 |
| erbb                  | 1 |
| equivalent            | 1 |
| enos                  | 1 |
| engine                | 1 |

|                     |   |
|---------------------|---|
| energies            | 1 |
| endothelial         | 1 |
| electric            | 1 |
| efficiency          | 1 |
| effects             | 1 |
| effector            | 1 |
| effect              | 1 |
| ef                  | 1 |
| edema               | 1 |
| e                   | 1 |
| dysfunction         | 1 |
| drug                | 1 |
| dnase               | 1 |
| division            | 1 |
| divergent           | 1 |
| discrete            | 1 |
| directly            | 1 |
| diphosphates        | 1 |
| development         | 1 |
| derived             | 1 |
| derivative          | 1 |
| dependency          | 1 |
| deoxyribonucleoside | 1 |
| deficient           | 1 |
| deficiency          | 1 |
| deacetylase         | 1 |
| de                  | 1 |
| d                   | 1 |
| cytochrome          | 1 |
| cysteine            | 1 |
| curves              | 1 |
| curve               | 1 |
| cryptic             | 1 |
| crosslinking        | 1 |
| couples             | 1 |
| cortical            | 1 |
| cores               | 1 |
| cord                | 1 |
| cooperative         | 1 |
| controls            | 1 |
| contraction         | 1 |



|                   |   |
|-------------------|---|
| contact           | 1 |
| constitutive      | 1 |
| conformational    | 1 |
| concurrent        | 1 |
| composition       | 1 |
| component         | 1 |
| competitive       | 1 |
| competence        | 1 |
| common            | 1 |
| commercial        | 1 |
| combined          | 1 |
| cold              | 1 |
| codon             | 1 |
| coa               | 1 |
| clearing          | 1 |
| classic           | 1 |
| circulating       | 1 |
| chymotrypsin      | 1 |
| chromosome        | 1 |
| chondrocyte       | 1 |
| choline           | 1 |
| chitinase         | 1 |
| chicago           | 1 |
| chemoattractant   | 1 |
| chemical          | 1 |
| characteristics   | 1 |
| chaperonin        | 1 |
| chaperones        | 1 |
| channels          | 1 |
| chain             | 1 |
| cerebral          | 1 |
| centromeric       | 1 |
| center            | 1 |
| cells             | 1 |
| cdna              | 1 |
| cation            | 1 |
| catabolism        | 1 |
| carrier           | 1 |
| cardiomyopathy    | 1 |
| carboxypeptidases | 1 |
| carboxypeptidase  | 1 |

|                |   |
|----------------|---|
| carbonic       | 1 |
| carbohydrate   | 1 |
| calmodulin     | 1 |
| box            | 1 |
| bound          | 1 |
| bone           | 1 |
| biogenesis     | 1 |
| bind           | 1 |
| bcr            | 1 |
| basic          | 1 |
| base           | 1 |
| average        | 1 |
| autonomic      | 1 |
| attenuation    | 1 |
| astrocyte      | 1 |
| aspartyl       | 1 |
| asparagine     | 1 |
| arterial       | 1 |
| aqueous        | 1 |
| aps            | 1 |
| antiviral      | 1 |
| antigens       | 1 |
| antibody       | 1 |
| antibiotic     | 1 |
| anhydrase      | 1 |
| angeles        | 1 |
| analogs        | 1 |
| analog         | 1 |
| aminoglycoside | 1 |
| allosteric     | 1 |
| allergen       | 1 |
| alleles        | 1 |
| agonist        | 1 |
| aggregated     | 1 |
| adult          | 1 |
| administration | 1 |
| adipose        | 1 |
| adipocyte      | 1 |
| adhesion       | 1 |
| addition       | 1 |
| adaptor        | 1 |

|                   |   |
|-------------------|---|
| acute             | 1 |
| activator         | 1 |
| actin             | 1 |
| acids             | 1 |
| acetyltransferase | 1 |
| acetyl            | 1 |
| acetate           | 1 |
| absent            | 1 |
| abdominal         | 1 |

**Table S26. Word counts of Collective mode ‘dismantled’ noun-phrases from the bPTH(7-34) superconserved dataset.** For each identified word the number of times the specific word occurred in the list of dismantled noun-phrases from *Textroux!* Individual processing is given. Word count scores were generated from the Wordle-sourced cloud.

| <b>Collective: Dismantled</b> | <b>Word Count</b> |
|-------------------------------|-------------------|
| histone                       | 156               |
| activation                    | 116               |
| fibroblasts                   | 110               |
| intrinsic                     | 108               |
| inhibition                    | 107               |
| apoptotic                     | 107               |
| phosphorylation               | 106               |
| apoptosis                     | 104               |
| collagen                      | 102               |
| protein                       | 87                |
| remodeling                    | 85                |
| activity                      | 79                |
| inhibited                     | 74                |
| heat                          | 72                |
| human                         | 69                |
| binding                       | 66                |
| shock                         | 64                |
| dermal                        | 63                |
| cell                          | 63                |
| acetylation                   | 56                |
| domain                        | 55                |
| caspase                       | 55                |
| transactivation               | 53                |
| acetyltransferase             | 51                |
| transforming                  | 50                |
| factor                        | 45                |
| connective                    | 41                |
| tissue                        | 40                |
| growth                        | 40                |
| chaperone                     | 39                |
| jurkat                        | 37                |
| deacetylase                   | 37                |
| cells                         | 32                |
| beta                          | 32                |

|              |    |
|--------------|----|
| terminal     | 31 |
| increased    | 28 |
| smad         | 27 |
| specific     | 26 |
| initiator    | 26 |
| imperfecta   | 26 |
| coactivator  | 26 |
| cdna         | 25 |
| fracture     | 24 |
| t            | 23 |
| proteins     | 23 |
| osteogenesis | 23 |
| type         | 22 |
| nucleosomal  | 22 |
| acetylated   | 22 |
| response     | 21 |
| expression   | 21 |
| element      | 21 |
| collagens    | 21 |
| site         | 20 |
| ii           | 20 |
| chromatin    | 20 |
| adenovirus   | 20 |
| histones     | 19 |
| hdac         | 19 |
| collagenase  | 19 |
| primary      | 18 |
| library      | 18 |
| dependent    | 18 |
| cultured     | 18 |
| cofactors    | 18 |
| ccaat        | 18 |
| tendon       | 17 |
| induced      | 17 |
| n            | 16 |
| genes        | 16 |
| sites        | 14 |
| pathway      | 14 |
| death        | 14 |
| complex      | 14 |
| camp         | 14 |

|               |    |
|---------------|----|
| procollagen   | 13 |
| inhibitor     | 13 |
| dna           | 13 |
| c             | 13 |
| vitro         | 12 |
| responsive    | 12 |
| potential     | 12 |
| nonhistone    | 12 |
| complexes     | 12 |
| templates     | 11 |
| signaling     | 11 |
| severe        | 11 |
| iii           | 11 |
| fractures     | 11 |
| domains       | 11 |
| deacetylases  | 11 |
| core          | 11 |
| bone          | 11 |
| activities    | 11 |
| transcription | 10 |
| substrate     | 10 |
| receptor      | 10 |
| membrane      | 10 |
| matrix        | 10 |
| formation     | 10 |
| enhanced      | 10 |
| downstream    | 10 |
| decreased     | 10 |
| treatment     | 9  |
| syndrome      | 9  |
| superfamily   | 9  |
| substrates    | 9  |
| properties    | 9  |
| nuclear       | 9  |
| normal        | 9  |
| motif         | 9  |
| mediated      | 9  |
| kinase        | 9  |
| endothelial   | 9  |
| ehlers        | 9  |
| danlos        | 9  |

|                |   |
|----------------|---|
| creb           | 9 |
| alpha          | 9 |
| acetyl         | 9 |
| transactivator | 8 |
| small          | 8 |
| sequence       | 8 |
| septic         | 8 |
| scleroderma    | 8 |
| reduced        | 8 |
| promoter       | 8 |
| potentiated    | 8 |
| myofibroblast  | 8 |
| interstitial   | 8 |
| effector       | 8 |
| deposition     | 8 |
| critical       | 8 |
| consensus      | 8 |
| chondrocyte    | 8 |
| cellular       | 8 |
| caspases       | 8 |
| activated      | 8 |
| vertebral      | 7 |
| vascular       | 7 |
| unfolding      | 7 |
| tumor          | 7 |
| tubulin        | 7 |
| translocated   | 7 |
| repeat         | 7 |
| recruitment    | 7 |
| multiple       | 7 |
| mechanism      | 7 |
| levels         | 7 |
| hormone        | 7 |
| helix          | 7 |
| fibroblast     | 7 |
| elements       | 7 |
| diploid        | 7 |
| cleavage       | 7 |
| class          | 7 |
| box            | 7 |
| assay          | 7 |

|                 |   |
|-----------------|---|
| triple          | 6 |
| tissues         | 6 |
| target          | 6 |
| stromal         | 6 |
| staurosporine   | 6 |
| signal          | 6 |
| short           | 6 |
| senescent       | 6 |
| risk            | 6 |
| production      | 6 |
| patient         | 6 |
| nucleosome      | 6 |
| methionine      | 6 |
| mammalian       | 6 |
| major           | 6 |
| local           | 6 |
| impaired        | 6 |
| hsp             | 6 |
| foreskin        | 6 |
| decorin         | 6 |
| coactivators    | 6 |
| chloramphenicol | 6 |
| active          | 6 |
| vivo            | 5 |
| vi              | 5 |
| translation     | 5 |
| studies         | 5 |
| stress          | 5 |
| serine          | 5 |
| regulated       | 5 |
| rapid           | 5 |
| program         | 5 |
| palpebral       | 5 |
| osteoporotic    | 5 |
| nad             | 5 |
| mechanisms      | 5 |
| lysine          | 5 |
| lymphocyte      | 5 |
| low             | 5 |
| inhibitors      | 5 |
| hamster         | 5 |



|               |   |
|---------------|---|
| global        | 5 |
| general       | 5 |
| fragments     | 5 |
| folding       | 5 |
| fissures      | 5 |
| fibril        | 5 |
| factors       | 5 |
| extracellular | 5 |
| early         | 5 |
| defects       | 5 |
| defect        | 5 |
| control       | 5 |
| conserved     | 5 |
| cognate       | 5 |
| codon         | 5 |
| choline       | 5 |
| chemical      | 5 |
| cascade       | 5 |
| bromide       | 5 |
| basal         | 5 |
| atp           | 5 |
| abnormal      | 5 |
| ability       | 5 |
| virus         | 4 |
| tyrosine      | 4 |
| transient     | 4 |
| tgf           | 4 |
| synovial      | 4 |
| stimulated    | 4 |
| segment       | 4 |
| reversible    | 4 |
| replication   | 4 |
| rat           | 4 |
| pro           | 4 |
| pkc           | 4 |
| pharmacologic | 4 |
| pathways      | 4 |
| negative      | 4 |
| myocyte       | 4 |
| mutant        | 4 |
| mild          | 4 |

|                    |   |
|--------------------|---|
| microvascular      | 4 |
| maximal            | 4 |
| massive            | 4 |
| libraries          | 4 |
| leukemia           | 4 |
| ix                 | 4 |
| isolated           | 4 |
| iron               | 4 |
| interaction        | 4 |
| inhibitory         | 4 |
| induction          | 4 |
| high               | 4 |
| hela               | 4 |
| glucocorticoid     | 4 |
| gabp               | 4 |
| free               | 4 |
| fibrils            | 4 |
| fibrillar          | 4 |
| feedback           | 4 |
| events             | 4 |
| essential          | 4 |
| embryo             | 4 |
| dominant           | 4 |
| differentiation    | 4 |
| cytosolic          | 4 |
| concomitant        | 4 |
| chicken            | 4 |
| chain              | 4 |
| catalytic          | 4 |
| capacity           | 4 |
| bodies             | 4 |
| bacterial          | 4 |
| autosomal          | 4 |
| associated         | 4 |
| assembly           | 4 |
| anti               | 4 |
| amelogenesis       | 4 |
| acetyltransferases | 4 |
| acetylase          | 4 |
| widespread         | 3 |
| viral              | 3 |

|               |   |
|---------------|---|
| vii           | 3 |
| ventricular   | 3 |
| vector        | 3 |
| ubiquitin     | 3 |
| typical       | 3 |
| types         | 3 |
| transport     | 3 |
| tails         | 3 |
| systemic      | 3 |
| system        | 3 |
| synthetic     | 3 |
| synthesis     | 3 |
| suppressing   | 3 |
| status        | 3 |
| state         | 3 |
| slow          | 3 |
| skin          | 3 |
| siRNA         | 3 |
| sheath        | 3 |
| sequential    | 3 |
| sequences     | 3 |
| selective     | 3 |
| sclera        | 3 |
| responses     | 3 |
| resistance    | 3 |
| residues      | 3 |
| release       | 3 |
| regulatory    | 3 |
| regulator     | 3 |
| region        | 3 |
| recognition   | 3 |
| recessive     | 3 |
| reaction      | 3 |
| purified      | 3 |
| prolonged     | 3 |
| proliferation | 3 |
| programs      | 3 |
| processing    | 3 |
| process       | 3 |
| preferred     | 3 |
| positive      | 3 |

|               |   |
|---------------|---|
| poor          | 3 |
| polypeptides  | 3 |
| phosphatase   | 3 |
| phenotype     | 3 |
| pathologic    | 3 |
| partial       | 3 |
| papillae      | 3 |
| noxious       | 3 |
| nonlethal     | 3 |
| muscle        | 3 |
| mrna          | 3 |
| mps           | 3 |
| mouse         | 3 |
| modifications | 3 |
| modification  | 3 |
| moderate      | 3 |
| mitochondrial | 3 |
| maturation    | 3 |
| marks         | 3 |
| machinery     | 3 |
| lymphatic     | 3 |
| lower         | 3 |
| loop          | 3 |
| loci          | 3 |
| lipid         | 3 |
| ligase        | 3 |
| latent        | 3 |
| late          | 3 |
| infection     | 3 |
| inducible     | 3 |
| highly        | 3 |
| helical       | 3 |
| gtpase        | 3 |
| glycoprotein  | 3 |
| gastric       | 3 |
| functional    | 3 |
| full          | 3 |
| fragmentation | 3 |
| form          | 3 |
| fold          | 3 |
| fiber         | 3 |

|               |   |
|---------------|---|
| extracts      | 3 |
| experiments   | 3 |
| excessive     | 3 |
| endogenous    | 3 |
| elevated      | 3 |
| electric      | 3 |
| effects       | 3 |
| dynamic       | 3 |
| disorders     | 3 |
| disorder      | 3 |
| direct        | 3 |
| digestion     | 3 |
| delta         | 3 |
| defective     | 3 |
| cyanogen      | 3 |
| crystallin    | 3 |
| cooperative   | 3 |
| components    | 3 |
| chromosomal   | 3 |
| central       | 3 |
| cartilage     | 3 |
| cardiac       | 3 |
| carboxy       | 3 |
| bound         | 3 |
| blood         | 3 |
| bind          | 3 |
| arterial      | 3 |
| antisense     | 3 |
| angiogenic    | 3 |
| amino         | 3 |
| adult         | 3 |
| actin         | 3 |
| acidic        | 3 |
| absent        | 3 |
| abnormalities | 3 |
| zap           | 2 |
| young         | 2 |
| yeast         | 2 |
| xi            | 2 |
| x             | 2 |
| weakness      | 2 |

|                |   |
|----------------|---|
| wall           | 2 |
| versus         | 2 |
| vectors        | 2 |
| universal      | 2 |
| unique         | 2 |
| transformed    | 2 |
| transformation | 2 |
| transferase    | 2 |
| trans          | 2 |
| toxic          | 2 |
| tonic          | 2 |
| thermal        | 2 |
| tendons        | 2 |
| targets        | 2 |
| targeting      | 2 |
| targeted       | 2 |
| subunits       | 2 |
| stimulus       | 2 |
| stimulation    | 2 |
| sterol         | 2 |
| states         | 2 |
| stable         | 2 |
| stability      | 2 |
| splicing       | 2 |
| specialized    | 2 |
| somatic        | 2 |
| soluble        | 2 |
| soft           | 2 |
| single         | 2 |
| signals        | 2 |
| serum          | 2 |
| serial         | 2 |
| sensitivity    | 2 |
| secretion      | 2 |
| sclerosis      | 2 |
| rodent         | 2 |
| reticulum      | 2 |
| results        | 2 |
| residue        | 2 |
| reporter       | 2 |
| replacement    | 2 |

|                   |   |
|-------------------|---|
| repair            | 2 |
| renal             | 2 |
| related           | 2 |
| regulating        | 2 |
| regions           | 2 |
| regional          | 2 |
| reflexes          | 2 |
| recombinant       | 2 |
| receptors         | 2 |
| reagent           | 2 |
| rate              | 2 |
| rabbit            | 2 |
| pulmonary         | 2 |
| proteolytic       | 2 |
| progressive       | 2 |
| progression       | 2 |
| profiles          | 2 |
| primed            | 2 |
| posttranslational | 2 |
| polymorphism      | 2 |
| platelet          | 2 |
| phosphopeptides   | 2 |
| phospholipid      | 2 |
| phorbol           | 2 |
| peptides          | 2 |
| patterns          | 2 |
| patients          | 2 |
| partially         | 2 |
| part              | 2 |
| papilla           | 2 |
| oncoproteins      | 2 |
| oncogene          | 2 |
| oligonucleotide   | 2 |
| neutrophil        | 2 |
| native            | 2 |
| naked             | 2 |
| multiprotein      | 2 |
| mucosal           | 2 |
| morpholino        | 2 |
| molecule          | 2 |
| modified          | 2 |

|                |   |
|----------------|---|
| minor          | 2 |
| minimal        | 2 |
| migration      | 2 |
| microtubule    | 2 |
| metal          | 2 |
| meningeal      | 2 |
| mature         | 2 |
| matrices       | 2 |
| mast           | 2 |
| markers        | 2 |
| mark           | 2 |
| manifestations | 2 |
| lymphocytes    | 2 |
| loss           | 2 |
| loose          | 2 |
| lipoprotein    | 2 |
| linker         | 2 |
| linked         | 2 |
| light          | 2 |
| lethal         | 2 |
| lesions        | 2 |
| kidney         | 2 |
| inverted       | 2 |
| intracellular  | 2 |
| interferon     | 2 |
| inherited      | 2 |
| inflammatory   | 2 |
| individual     | 2 |
| hypertrophic   | 2 |
| hiv            | 2 |
| hepatocyte     | 2 |
| groups         | 2 |
| greater        | 2 |
| gram           | 2 |
| glomerular     | 2 |
| gingival       | 2 |
| gel            | 2 |
| foot           | 2 |
| extremely      | 2 |
| expressed      | 2 |
| epidermal      | 2 |



|               |   |
|---------------|---|
| enzymatic     | 2 |
| entry         | 2 |
| enhancer      | 2 |
| energy        | 2 |
| endoplasmic   | 2 |
| embryonic     | 2 |
| efficiency    | 2 |
| dual          | 2 |
| drug          | 2 |
| divergent     | 2 |
| distal        | 2 |
| displacement  | 2 |
| diseases      | 2 |
| diminished    | 2 |
| differences   | 2 |
| density       | 2 |
| dendritic     | 2 |
| degranulation | 2 |
| degeneration  | 2 |
| deficiency    | 2 |
| deep          | 2 |
| cytoskeletal  | 2 |
| cytokines     | 2 |
| cytokine      | 2 |
| cyclic        | 2 |
| cycle         | 2 |
| corneal       | 2 |
| contraction   | 2 |
| contact       | 2 |
| congenita     | 2 |
| component     | 2 |
| complete      | 2 |
| competitive   | 2 |
| common        | 2 |
| colony        | 2 |
| code          | 2 |
| coa           | 2 |
| clone         | 2 |
| clearance     | 2 |
| chronic       | 2 |
| chromosome    | 2 |

|               |   |
|---------------|---|
| chinese       | 2 |
| channel       | 2 |
| cascades      | 2 |
| carnitine     | 2 |
| cardiomyocyte | 2 |
| capillaries   | 2 |
| callus        | 2 |
| calcium       | 2 |
| bundles       | 2 |
| brain         | 2 |
| boxes         | 2 |
| biopsies      | 2 |
| behavior      | 2 |
| basement      | 2 |
| baby          | 2 |
| b             | 2 |
| assays        | 2 |
| artery        | 2 |
| arrays        | 2 |
| apoptosome    | 2 |
| antihuman     | 2 |
| antibody      | 2 |
| analysis      | 2 |
| amyloid       | 2 |
| alveolar      | 2 |
| allele        | 2 |
| agent         | 2 |
| adhesion      | 2 |
| acute         | 2 |
| abnormality   | 2 |
| abilities     | 2 |
| zymogen       | 1 |
| xviii         | 1 |
| xv            | 1 |
| xiv           | 1 |
| wounds        | 1 |
| wound         | 1 |
| wide          | 1 |
| wasp          | 1 |
| viruses       | 1 |
| villus        | 1 |

|                      |   |
|----------------------|---|
| viability            | 1 |
| vessels              | 1 |
| vessel               | 1 |
| vero                 | 1 |
| variation            | 1 |
| variants             | 1 |
| variant              | 1 |
| valve                | 1 |
| v                    | 1 |
| uterine              | 1 |
| upstream             | 1 |
| upper                | 1 |
| unrelated            | 1 |
| units                | 1 |
| ubiquitous           | 1 |
| ubiquitination       | 1 |
| triggering           | 1 |
| trigger              | 1 |
| transmembrane        | 1 |
| translocation        | 1 |
| translational        | 1 |
| transforms           | 1 |
| transfer             | 1 |
| transdifferentiation | 1 |
| transactivators      | 1 |
| trail                | 1 |
| trafficking          | 1 |
| toxicity             | 1 |
| total                | 1 |
| topoisomerase        | 1 |
| tibialis             | 1 |
| tibia                | 1 |
| thyroid              | 1 |
| thymus               | 1 |
| thymocyte            | 1 |
| thresholds           | 1 |
| threonine            | 1 |
| therapeutic          | 1 |
| testicular           | 1 |
| term                 | 1 |
| tensin               | 1 |

|                |   |
|----------------|---|
| temperature    | 1 |
| systolic       | 1 |
| synchronous    | 1 |
| synaptic       | 1 |
| sweat          | 1 |
| sustained      | 1 |
| susceptibility | 1 |
| supply         | 1 |
| sulfate        | 1 |
| suicide        | 1 |
| subfamily      | 1 |
| subepithelial  | 1 |
| structures     | 1 |
| structural     | 1 |
| strength       | 1 |
| storage        | 1 |
| stiffness      | 1 |
| stem           | 1 |
| staining       | 1 |
| stage          | 1 |
| stabilized     | 1 |
| srebp          | 1 |
| spontaneously  | 1 |
| spontaneous    | 1 |
| spiral         | 1 |
| spindle        | 1 |
| spermatocyte   | 1 |
| snornp         | 1 |
| smooth         | 1 |
| slit           | 1 |
| sleep          | 1 |
| skeleton       | 1 |
| skeletal       | 1 |
| sinus          | 1 |
| sink           | 1 |
| simplex        | 1 |
| simple         | 1 |
| signature      | 1 |
| sheet          | 1 |
| sharp          | 1 |
| shared         | 1 |

|               |   |
|---------------|---|
| sera          | 1 |
| sensor        | 1 |
| segments      | 1 |
| secondary     | 1 |
| sarcomere     | 1 |
| sapk          | 1 |
| salicylate    | 1 |
| role          | 1 |
| ridges        | 1 |
| ridge         | 1 |
| rich          | 1 |
| ribosomal     | 1 |
| rhythmic      | 1 |
| rhodopsin     | 1 |
| rhesus        | 1 |
| reverse       | 1 |
| retroviruses  | 1 |
| retinoic      | 1 |
| retinal       | 1 |
| retardation   | 1 |
| resting       | 1 |
| required      | 1 |
| repeats       | 1 |
| regulators    | 1 |
| regular       | 1 |
| regression    | 1 |
| reductive     | 1 |
| reduction     | 1 |
| redox         | 1 |
| recurrent     | 1 |
| recombination | 1 |
| reciprocal    | 1 |
| reactions     | 1 |
| rb            | 1 |
| rates         | 1 |
| rapamycin     | 1 |
| random        | 1 |
| radical       | 1 |
| qualitative   | 1 |
| quail         | 1 |
| proteolysis   | 1 |

|                   |   |
|-------------------|---|
| proteoglycans     | 1 |
| proteases         | 1 |
| property          | 1 |
| proper            | 1 |
| propensity        | 1 |
| promoting         | 1 |
| promoters         | 1 |
| prolyl            | 1 |
| proliferating     | 1 |
| prokaryotic       | 1 |
| programmed        | 1 |
| progenitors       | 1 |
| progenitor        | 1 |
| product           | 1 |
| processes         | 1 |
| pressure          | 1 |
| presentation      | 1 |
| preparation       | 1 |
| predominant       | 1 |
| postmenopausal    | 1 |
| portal            | 1 |
| polymorphonuclear | 1 |
| polarity          | 1 |
| pluripotent       | 1 |
| plasmid           | 1 |
| plasma            | 1 |
| plantar           | 1 |
| placental         | 1 |
| physiologic       | 1 |
| photosensitivity  | 1 |
| phosphoproteins   | 1 |
| persistent        | 1 |
| permanent         | 1 |
| periodic          | 1 |
| period            | 1 |
| pericyte          | 1 |
| peptide           | 1 |
| pelvic            | 1 |
| pdgfr             | 1 |
| patterning        | 1 |
| pattern           | 1 |

|                  |   |
|------------------|---|
| passive          | 1 |
| passage          | 1 |
| partners         | 1 |
| particles        | 1 |
| parp             | 1 |
| parathyroid      | 1 |
| parallel         | 1 |
| paradoxical      | 1 |
| painful          | 1 |
| packaging        | 1 |
| outgrowth        | 1 |
| outcome          | 1 |
| ouabain          | 1 |
| osteoblast       | 1 |
| osmotic          | 1 |
| orientation      | 1 |
| organization     | 1 |
| orderly          | 1 |
| opsin            | 1 |
| onset            | 1 |
| oncogenes        | 1 |
| oligonucleotides | 1 |
| oligodendrocyte  | 1 |
| ocular           | 1 |
| octamer          | 1 |
| observed         | 1 |
| nucleosomes      | 1 |
| nuclei           | 1 |
| nonspecific      | 1 |
| nonlinear        | 1 |
| nomenclature     | 1 |
| nocturnal        | 1 |
| nociceptor       | 1 |
| nociception      | 1 |
| nk               | 1 |
| nicotinamide     | 1 |
| nevi             | 1 |
| neutrophils      | 1 |
| neuron           | 1 |
| neuroimmune      | 1 |
| neurofilament    | 1 |

|                    |   |
|--------------------|---|
| neuroepithelial    | 1 |
| neural             | 1 |
| neovascularization | 1 |
| necrosis           | 1 |
| narrow             | 1 |
| myristate          | 1 |
| myocytes           | 1 |
| myocardial         | 1 |
| myoblasts          | 1 |
| mycobacterial      | 1 |
| myc                | 1 |
| myb                | 1 |
| mutation           | 1 |
| mutants            | 1 |
| motifs             | 1 |
| mosaicism          | 1 |
| monkey             | 1 |
| molecules          | 1 |
| modulator          | 1 |
| modulated          | 1 |
| modifiers          | 1 |
| modifier           | 1 |
| mixtures           | 1 |
| mitogenic          | 1 |
| mitogen            | 1 |
| mimicry            | 1 |
| migrating          | 1 |
| microvasculature   | 1 |
| methylated         | 1 |
| methylase          | 1 |
| methyl             | 1 |
| metalloproteinase  | 1 |
| metabolism         | 1 |
| messages           | 1 |
| mesangial          | 1 |
| melting            | 1 |
| melanoma           | 1 |
| melanin            | 1 |
| medullary          | 1 |
| mediator           | 1 |
| maximum            | 1 |



|                |   |
|----------------|---|
| maternal       | 1 |
| maps           | 1 |
| mapk           | 1 |
| map            | 1 |
| manganese      | 1 |
| main           | 1 |
| lymphoma       | 1 |
| lymphoblastoid | 1 |
| luciferase     | 1 |
| lovastatin     | 1 |
| long           | 1 |
| locus          | 1 |
| localized      | 1 |
| localization   | 1 |
| lithium        | 1 |
| lines          | 1 |
| life           | 1 |
| level          | 1 |
| leukocytes     | 1 |
| leprosy        | 1 |
| lens           | 1 |
| left           | 1 |
| layers         | 1 |
| lattices       | 1 |
| lateral        | 1 |
| lacz           | 1 |
| labeled        | 1 |
| kinetics       | 1 |
| keratinocytes  | 1 |
| jun            | 1 |
| isoniazid      | 1 |
| irradiation    | 1 |
| irradiated     | 1 |
| irf            | 1 |
| ion            | 1 |
| invertebrate   | 1 |
| invasion       | 1 |
| intestinal     | 1 |
| interlobular   | 1 |
| interfacial    | 1 |
| interface      | 1 |

|                |   |
|----------------|---|
| insulin        | 1 |
| instability    | 1 |
| insoluble      | 1 |
| injury         | 1 |
| inhibiting     | 1 |
| inflammation   | 1 |
| infiltration   | 1 |
| inducing       | 1 |
| inducers       | 1 |
| inducer        | 1 |
| indomethacin   | 1 |
| indirect       | 1 |
| independent    | 1 |
| increase       | 1 |
| inappropriate  | 1 |
| inactive       | 1 |
| inactivating   | 1 |
| immune         | 1 |
| immobilized    | 1 |
| iiic           | 1 |
| iiia           | 1 |
| iib            | 1 |
| iia            | 1 |
| hypoplastic    | 1 |
| hypoplasia     | 1 |
| hyperalgesia   | 1 |
| huvec          | 1 |
| host           | 1 |
| homologous     | 1 |
| history        | 1 |
| histidine      | 1 |
| hip            | 1 |
| heteroduplexes | 1 |
| herpes         | 1 |
| heritable      | 1 |
| hepatocytes    | 1 |
| hepatocellular | 1 |
| hemorrhagic    | 1 |
| hematopoietic  | 1 |
| helices        | 1 |
| heart          | 1 |

|                |   |
|----------------|---|
| healing        | 1 |
| hcv            | 1 |
| harmful        | 1 |
| hair           | 1 |
| group          | 1 |
| groove         | 1 |
| gorilla        | 1 |
| golgi          | 1 |
| goat           | 1 |
| glycinergic    | 1 |
| glycation      | 1 |
| glutamatergic  | 1 |
| glucokinase    | 1 |
| glands         | 1 |
| genotype       | 1 |
| genomic        | 1 |
| gene           | 1 |
| gap            | 1 |
| gamma          | 1 |
| fusions        | 1 |
| functions      | 1 |
| freeze         | 1 |
| fraction       | 1 |
| forced         | 1 |
| force          | 1 |
| follicle       | 1 |
| foci           | 1 |
| focal          | 1 |
| fluoride       | 1 |
| fibers         | 1 |
| fetal          | 1 |
| female         | 1 |
| feeding        | 1 |
| fanconi        | 1 |
| families       | 1 |
| extraskkeletal | 1 |
| extensor       | 1 |
| extension      | 1 |
| extended       | 1 |
| exposure       | 1 |
| experimental   | 1 |

|                    |   |
|--------------------|---|
| exchange           | 1 |
| excess             | 1 |
| ethylmaleimide     | 1 |
| ethidium           | 1 |
| estrogen           | 1 |
| ester              | 1 |
| erythropoietin     | 1 |
| erythrocyte        | 1 |
| erythroblast       | 1 |
| epstein            | 1 |
| epsilon            | 1 |
| eosinophil         | 1 |
| enzymes            | 1 |
| environmental      | 1 |
| environment        | 1 |
| enterocyte         | 1 |
| enhancers          | 1 |
| enhancement        | 1 |
| energies           | 1 |
| endotoxic          | 1 |
| endometrial        | 1 |
| endocardial        | 1 |
| end                | 1 |
| empty              | 1 |
| elimination        | 1 |
| electrophysiologic | 1 |
| electroconvulsive  | 1 |
| elastase           | 1 |
| effect             | 1 |
| eccrine            | 1 |
| ec                 | 1 |
| ebv                | 1 |
| dynein             | 1 |
| dopamine           | 1 |
| dnase              | 1 |
| dnaj               | 1 |
| division           | 1 |
| disordered         | 1 |
| disease            | 1 |
| dinucleotide       | 1 |
| dimethyl           | 1 |

|                  |   |
|------------------|---|
| dihydrolipoamide | 1 |
| diffuse          | 1 |
| differentiated   | 1 |
| differential     | 1 |
| difference       | 1 |
| dids             | 1 |
| diameters        | 1 |
| diameter         | 1 |
| development      | 1 |
| developing       | 1 |
| determinants     | 1 |
| determinant      | 1 |
| destruction      | 1 |
| descending       | 1 |
| dermatitis       | 1 |
| derived          | 1 |
| derivatives      | 1 |
| deprivation      | 1 |
| dense            | 1 |
| denaturation     | 1 |
| demethylases     | 1 |
| degradation      | 1 |
| degenerative     | 1 |
| deficient        | 1 |
| decidual         | 1 |
| cytosol          | 1 |
| cysts            | 1 |
| cysteine         | 1 |
| cushions         | 1 |
| curves           | 1 |
| currents         | 1 |
| cryptic          | 1 |
| crosslinking     | 1 |
| couples          | 1 |
| corpses          | 1 |
| copper           | 1 |
| coordinating     | 1 |
| conversion       | 1 |
| controls         | 1 |
| content          | 1 |
| containing       | 1 |

|                 |   |
|-----------------|---|
| constitutive    | 1 |
| constant        | 1 |
| connections     | 1 |
| congenital      | 1 |
| conformational  | 1 |
| conditions      | 1 |
| concurrent      | 1 |
| compression     | 1 |
| competence      | 1 |
| compensatory    | 1 |
| combined        | 1 |
| colon           | 1 |
| collateral      | 1 |
| cold            | 1 |
| coagulation     | 1 |
| clusters        | 1 |
| classic         | 1 |
| circadian       | 1 |
| chromosomes     | 1 |
| chorionic       | 1 |
| chloride        | 1 |
| chimeric        | 1 |
| chick           | 1 |
| characteristics | 1 |
| characteristic  | 1 |
| chaperones      | 1 |
| challenge       | 1 |
| chains          | 1 |
| cgmp            | 1 |
| cervical        | 1 |
| caucasian       | 1 |
| catenin         | 1 |
| catabolism      | 1 |
| cases           | 1 |
| cartilaginous   | 1 |
| cardiovascular  | 1 |
| cardiomyocytes  | 1 |
| carcinoma       | 1 |
| carcinogenic    | 1 |
| carbohydrate    | 1 |
| capsular        | 1 |

|                  |   |
|------------------|---|
| capacities       | 1 |
| canonical        | 1 |
| candidate        | 1 |
| cancer           | 1 |
| calreticulin     | 1 |
| calnexin         | 1 |
| calf             | 1 |
| bulk             | 1 |
| bronchiolar      | 1 |
| broad            | 1 |
| bovine           | 1 |
| body             | 1 |
| blue             | 1 |
| blocks           | 1 |
| blocking         | 1 |
| biotinylation    | 1 |
| biology          | 1 |
| bed              | 1 |
| baseline         | 1 |
| barr             | 1 |
| baculoviral      | 1 |
| avoidance        | 1 |
| avian            | 1 |
| average          | 1 |
| auxiliary        | 1 |
| autonomous       | 1 |
| autonomic        | 1 |
| autoimmune       | 1 |
| atypical         | 1 |
| attribute        | 1 |
| attenuated       | 1 |
| atrophy          | 1 |
| atrioventricular | 1 |
| atopic           | 1 |
| asymmetric       | 1 |
| astrocyte        | 1 |
| aspirin          | 1 |
| arrangement      | 1 |
| area             | 1 |
| architecture     | 1 |
| arch             | 1 |

|                |   |
|----------------|---|
| apical         | 1 |
| aortic         | 1 |
| antigens       | 1 |
| antigen        | 1 |
| antibiotic     | 1 |
| antiangiogenic | 1 |
| anterior       | 1 |
| anomaly        | 1 |
| ankyrin        | 1 |
| angiogenesis   | 1 |
| anemia         | 1 |
| androgenic     | 1 |
| anchor         | 1 |
| amplification  | 1 |
| amp            | 1 |
| amniotic       | 1 |
| amnion         | 1 |
| amines         | 1 |
| ameloblast     | 1 |
| amanitin       | 1 |
| alternative    | 1 |
| allergen       | 1 |
| albumin        | 1 |
| alanine        | 1 |
| ala            | 1 |
| airway         | 1 |
| aif            | 1 |
| aging          | 1 |
| affinity       | 1 |
| adventitial    | 1 |
| adjuvant       | 1 |
| adhesiveness   | 1 |
| adenine        | 1 |
| additive       | 1 |
| activator      | 1 |
| activating     | 1 |
| acid           | 1 |
| acetate        | 1 |
| accounts       | 1 |
| access         | 1 |
| acceptors      | 1 |



|             |   |
|-------------|---|
| accelerated | 1 |
| abl         | 1 |
| aberrant    | 1 |

**Table S27. Word counts of Collective + Individual mode ‘dismantled’ noun-phrases from the bPTH(7-34) superconserved dataset.** For each identified word the number of times the specific word occurred in the list of dismantled noun-phrases from *Textrous!* Individual processing is given. Word count scores were generated from the Wordle-sourced cloud using WriteWords ([http://www.writewords.org.uk/word\\_count.asp](http://www.writewords.org.uk/word_count.asp)).

| <b>Collective + Individual Words</b> | <b>Count</b> |
|--------------------------------------|--------------|
| phosphorylation                      | 257          |
| activation                           | 233          |
| protein                              | 215          |
| kinase                               | 183          |
| histone                              | 156          |
| activity                             | 145          |
| serine                               | 129          |
| domain                               | 125          |
| catalytic                            | 116          |
| inhibition                           | 112          |
| intrinsic                            | 111          |
| fibroblasts                          | 110          |
| apoptotic                            | 109          |
| mitochondrial                        | 107          |
| apoptosis                            | 107          |
| transduction                         | 105          |
| insulin                              | 103          |
| kinases                              | 102          |
| collagen                             | 102          |
| signal                               | 101          |
| dependent                            | 98           |
| human                                | 93           |
| remodeling                           | 85           |
| inhibited                            | 76           |
| cell                                 | 76           |
| site                                 | 74           |
| heat                                 | 73           |
| binding                              | 72           |
| terminal                             | 71           |
| mitochondria                         | 65           |
| shock                                | 64           |
| dermal                               | 63           |
| camp                                 | 63           |

|                     |    |
|---------------------|----|
| factor              | 61 |
| caspase             | 59 |
| acetylation         | 56 |
| transactivation     | 53 |
| transforming        | 52 |
| acetyltransferase   | 52 |
| increased           | 48 |
| specific            | 43 |
| anchor              | 43 |
| growth              | 42 |
| tissue              | 41 |
| connective          | 41 |
| tyrosine            | 40 |
| ii                  | 39 |
| chaperone           | 39 |
| beta                | 39 |
| jurkat              | 38 |
| deacetylase         | 38 |
| pathway             | 37 |
| sites               | 35 |
| n                   | 34 |
| c                   | 34 |
| type                | 33 |
| pka                 | 33 |
| ceramide            | 33 |
| cells               | 33 |
| potential           | 32 |
| proteins            | 31 |
| cytosol             | 31 |
| chromatin           | 31 |
| smad                | 30 |
| interacting         | 30 |
| response            | 28 |
| t                   | 27 |
| inhibitor           | 27 |
| initiator           | 26 |
| imperfecta          | 26 |
| immunoprecipitation | 26 |
| coactivator         | 26 |
| cdna                | 26 |
| adipocytes          | 26 |

|               |    |
|---------------|----|
| induced       | 25 |
| promoter      | 24 |
| primary       | 24 |
| fracture      | 24 |
| element       | 24 |
| vitro         | 23 |
| osteogenesis  | 23 |
| membrane      | 23 |
| expression    | 23 |
| core          | 23 |
| activated     | 23 |
| signaling     | 22 |
| nucleosomal   | 22 |
| hdac          | 22 |
| cultured      | 22 |
| acetylated    | 22 |
| collagens     | 21 |
| downstream    | 20 |
| adenovirus    | 20 |
| mouse         | 19 |
| histones      | 19 |
| enhanced      | 19 |
| dna           | 19 |
| collagenase   | 19 |
| threonine     | 18 |
| pathways      | 18 |
| library       | 18 |
| cofactors     | 18 |
| cellular      | 18 |
| ccaat         | 18 |
| transcription | 17 |
| tendon        | 17 |
| sequence      | 17 |
| rat           | 17 |
| decreased     | 17 |
| critical      | 17 |
| complex       | 17 |
| reduced       | 16 |
| genes         | 16 |
| death         | 16 |
| receptor      | 15 |

|               |    |
|---------------|----|
| multiple      | 15 |
| matrix        | 15 |
| intracellular | 15 |
| domains       | 15 |
| residue       | 14 |
| normal        | 14 |
| muscle        | 14 |
| motif         | 14 |
| major         | 14 |
| conserved     | 14 |
| consensus     | 14 |
| cascade       | 14 |
| assay         | 14 |
| activities    | 14 |
| active        | 14 |
| translation   | 13 |
| temperatures  | 13 |
| substrate     | 13 |
| staurosporine | 13 |
| responsive    | 13 |
| release       | 13 |
| procollagen   | 13 |
| mediated      | 13 |
| isolated      | 13 |
| formation     | 13 |
| treatment     | 12 |
| synthesis     | 12 |
| substrates    | 12 |
| residues      | 12 |
| nonhistone    | 12 |
| liver         | 12 |
| iii           | 12 |
| extracellular | 12 |
| complexes     | 12 |
| bone          | 12 |
| basal         | 12 |
| amp           | 12 |
| templates     | 11 |
| severe        | 11 |
| resistance    | 11 |
| rapamycin     | 11 |

|                |    |
|----------------|----|
| mechanism      | 11 |
| fractures      | 11 |
| deacetylases   | 11 |
| cleavage       | 11 |
| superfamily    | 10 |
| studies        | 10 |
| regulated      | 10 |
| proteases      | 10 |
| production     | 10 |
| pkc            | 10 |
| nuclear        | 10 |
| hormone        | 10 |
| endothelial    | 10 |
| class          | 10 |
| cgmp           | 10 |
| acetyl         | 10 |
| vivo           | 9  |
| vacuole        | 9  |
| syndrome       | 9  |
| subunit        | 9  |
| stress         | 9  |
| properties     | 9  |
| potentiated    | 9  |
| phosphoserine  | 9  |
| myofibroblast  | 9  |
| map            | 9  |
| levels         | 9  |
| inhibitors     | 9  |
| high           | 9  |
| fibroblast     | 9  |
| elements       | 9  |
| ehlers         | 9  |
| effector       | 9  |
| danlos         | 9  |
| creb           | 9  |
| control        | 9  |
| chondrocyte    | 9  |
| brain          | 9  |
| alpha          | 9  |
| tumor          | 8  |
| transactivator | 8  |

|                              |   |
|------------------------------|---|
| tgf                          | 8 |
| target                       | 8 |
| small                        | 8 |
| septic                       | 8 |
| segment                      | 8 |
| scleroderma                  | 8 |
| regulatory                   | 8 |
| recruitment                  | 8 |
| rapid                        | 8 |
| mammalian                    | 8 |
| lymphocyte                   | 8 |
| lower                        | 8 |
| interstitial                 | 8 |
| impaired                     | 8 |
| helix                        | 8 |
| hela                         | 8 |
| glycosylphosphatidylinositol | 8 |
| experiments                  | 8 |
| events                       | 8 |
| elevated                     | 8 |
| deposition                   | 8 |
| cyclin                       | 8 |
| cyclic                       | 8 |
| caspases                     | 8 |
| box                          | 8 |
| analysis                     | 8 |
| vertebral                    | 7 |
| vascular                     | 7 |
| unfolding                    | 7 |
| typical                      | 7 |
| tubulin                      | 7 |
| translocated                 | 7 |
| tissues                      | 7 |
| system                       | 7 |
| single                       | 7 |
| repeat                       | 7 |
| mutant                       | 7 |
| mechanisms                   | 7 |
| maximal                      | 7 |
| lysine                       | 7 |
| loop                         | 7 |

|               |   |
|---------------|---|
| local         | 7 |
| fragmentation | 7 |
| factors       | 7 |
| diploid       | 7 |
| cytosolic     | 7 |
| creatine      | 7 |
| central       | 7 |
| carboxy       | 7 |
| atp           | 7 |
| abnormal      | 7 |
| a             | 7 |
| triple        | 6 |
| transient     | 6 |
| targeting     | 6 |
| stromal       | 6 |
| short         | 6 |
| sequential    | 6 |
| senescent     | 6 |
| risk          | 6 |
| reversible    | 6 |
| region        | 6 |
| reaction      | 6 |
| proteinase    | 6 |
| program       | 6 |
| phosphatase   | 6 |
| patient       | 6 |
| nucleosome    | 6 |
| mitogen       | 6 |
| mild          | 6 |
| methionine    | 6 |
| low           | 6 |
| long          | 6 |
| induction     | 6 |
| individual    | 6 |
| hsp           | 6 |
| full          | 6 |
| foreskin      | 6 |
| energy        | 6 |
| endogenous    | 6 |
| dynamic       | 6 |
| direct        | 6 |



|                 |   |
|-----------------|---|
| delta           | 6 |
| decorin         | 6 |
| cytoplasmic     | 6 |
| content         | 6 |
| concomitant     | 6 |
| codon           | 6 |
| coactivators    | 6 |
| choline         | 6 |
| chloramphenicol | 6 |
| chemical        | 6 |
| casein          | 6 |
| cardiac         | 6 |
| associated      | 6 |
| amino           | 6 |
| action          | 6 |
| yeast           | 5 |
| vi              | 5 |
| unique          | 5 |
| transport       | 5 |
| stimulated      | 5 |
| state           | 5 |
| sequences       | 5 |
| sensitivity     | 5 |
| related         | 5 |
| regions         | 5 |
| recombinant     | 5 |
| purified        | 5 |
| processing      | 5 |
| poor            | 5 |
| palpebral       | 5 |
| osteoporotic    | 5 |
| nad             | 5 |
| myocyte         | 5 |
| motifs          | 5 |
| loci            | 5 |
| lipid           | 5 |
| jun             | 5 |
| ix              | 5 |
| inducible       | 5 |
| highly          | 5 |
| hamster         | 5 |

|                |   |
|----------------|---|
| glucocorticoid | 5 |
| global         | 5 |
| general        | 5 |
| functional     | 5 |
| fragments      | 5 |
| folding        | 5 |
| fissures       | 5 |
| fibril         | 5 |
| exchange       | 5 |
| excessive      | 5 |
| early          | 5 |
| defects        | 5 |
| defective      | 5 |
| defect         | 5 |
| components     | 5 |
| cognate        | 5 |
| chain          | 5 |
| calcium        | 5 |
| bromide        | 5 |
| bovine         | 5 |
| body           | 5 |
| assays         | 5 |
| acidic         | 5 |
| ability        | 5 |
| virus          | 4 |
| translational  | 4 |
| targets        | 4 |
| synthetic      | 4 |
| synovial       | 4 |
| suppressing    | 4 |
| stimulation    | 4 |
| status         | 4 |
| states         | 4 |
| soluble        | 4 |
| skeletal       | 4 |
| siRNA          | 4 |
| selective      | 4 |
| secretion      | 4 |
| rhodopsin      | 4 |
| results        | 4 |
| replication    | 4 |

|                 |   |
|-----------------|---|
| regulator       | 4 |
| regulating      | 4 |
| recognition     | 4 |
| proteolytic     | 4 |
| prolonged       | 4 |
| proliferation   | 4 |
| programs        | 4 |
| process         | 4 |
| pro             | 4 |
| preferred       | 4 |
| predominant     | 4 |
| positive        | 4 |
| phosphorylating | 4 |
| phosphopeptides | 4 |
| phorbol         | 4 |
| phase           | 4 |
| pharmacologic   | 4 |
| pathologic      | 4 |
| nucleoside      | 4 |
| neutrophil      | 4 |
| negative        | 4 |
| minimal         | 4 |
| microvascular   | 4 |
| mature          | 4 |
| massive         | 4 |
| mapk            | 4 |
| machinery       | 4 |
| libraries       | 4 |
| leukemia        | 4 |
| latent          | 4 |
| kidney          | 4 |
| iron            | 4 |
| interaction     | 4 |
| inhibitory      | 4 |
| heart           | 4 |
| gabp            | 4 |
| free            | 4 |
| fibrils         | 4 |
| fibrillar       | 4 |
| feedback        | 4 |
| extracts        | 4 |

|                    |   |
|--------------------|---|
| essential          | 4 |
| epsilon            | 4 |
| enhancer           | 4 |
| embryo             | 4 |
| elongation         | 4 |
| electric           | 4 |
| effects            | 4 |
| dual               | 4 |
| dominant           | 4 |
| diphosphate        | 4 |
| differentiation    | 4 |
| differentiated     | 4 |
| cytokine           | 4 |
| cooperative        | 4 |
| chicken            | 4 |
| characteristic     | 4 |
| cascades           | 4 |
| capacity           | 4 |
| bound              | 4 |
| bodies             | 4 |
| bind               | 4 |
| bacterial          | 4 |
| autosomal          | 4 |
| assembly           | 4 |
| arterial           | 4 |
| apoptosome         | 4 |
| anti               | 4 |
| amelogenesis       | 4 |
| adult              | 4 |
| actin              | 4 |
| acetyltransferases | 4 |
| acetylase          | 4 |
| absent             | 4 |
| widespread         | 3 |
| viral              | 3 |
| vii                | 3 |
| ventricular        | 3 |
| vector             | 3 |
| variant            | 3 |
| upstream           | 3 |
| universal          | 3 |

|                   |   |
|-------------------|---|
| ubiquitin         | 3 |
| types             | 3 |
| transmembrane     | 3 |
| translocation     | 3 |
| transition        | 3 |
| total             | 3 |
| tails             | 3 |
| systemic          | 3 |
| subunits          | 3 |
| splicing          | 3 |
| slow              | 3 |
| skin              | 3 |
| signals           | 3 |
| sheath            | 3 |
| serial            | 3 |
| sclera            | 3 |
| ribonucleoside    | 3 |
| responses         | 3 |
| reporter          | 3 |
| regional          | 3 |
| reciprocal        | 3 |
| recessive         | 3 |
| receptors         | 3 |
| reagent           | 3 |
| radiolabeled      | 3 |
| rabbit            | 3 |
| processes         | 3 |
| primed            | 3 |
| posttranslational | 3 |
| polypeptides      | 3 |
| platelet          | 3 |
| physiologic       | 3 |
| phenotype         | 3 |
| permeability      | 3 |
| peptide           | 3 |
| partners          | 3 |
| partner           | 3 |
| partial           | 3 |
| papillae          | 3 |
| pancreatic        | 3 |
| oxidative         | 3 |

|               |   |
|---------------|---|
| noxious       | 3 |
| novo          | 3 |
| nonreceptor   | 3 |
| nonlethal     | 3 |
| mrna          | 3 |
| mps           | 3 |
| molecules     | 3 |
| molecule      | 3 |
| modifications | 3 |
| modification  | 3 |
| moderate      | 3 |
| mitogenic     | 3 |
| migration     | 3 |
| metabolism    | 3 |
| maturation    | 3 |
| mast          | 3 |
| marks         | 3 |
| mark          | 3 |
| main          | 3 |
| lymphatic     | 3 |
| localization  | 3 |
| light         | 3 |
| ligase        | 3 |
| level         | 3 |
| late          | 3 |
| jak           | 3 |
| interferon    | 3 |
| interfacial   | 3 |
| infection     | 3 |
| increase      | 3 |
| inactive      | 3 |
| inactivating  | 3 |
| hypertrophic  | 3 |
| hydrolase     | 3 |
| hiv           | 3 |
| hepatocyte    | 3 |
| helical       | 3 |
| gtpase        | 3 |
| glycoprotein  | 3 |
| glucosyl      | 3 |
| glucose       | 3 |

|               |   |
|---------------|---|
| gastric       | 3 |
| fraction      | 3 |
| form          | 3 |
| force         | 3 |
| fold          | 3 |
| fiber         | 3 |
| eukaryotic    | 3 |
| esterase      | 3 |
| efficiency    | 3 |
| drug          | 3 |
| divergent     | 3 |
| disorders     | 3 |
| disorder      | 3 |
| digestion     | 3 |
| deficiency    | 3 |
| cyanogen      | 3 |
| crystallin    | 3 |
| contraction   | 3 |
| contact       | 3 |
| component     | 3 |
| competitive   | 3 |
| common        | 3 |
| coa           | 3 |
| chromosome    | 3 |
| chromosomal   | 3 |
| cartilage     | 3 |
| canonical     | 3 |
| brown         | 3 |
| broad         | 3 |
| blood         | 3 |
| biosynthesis  | 3 |
| apparatus     | 3 |
| antisense     | 3 |
| antibody      | 3 |
| angiogenic    | 3 |
| adhesion      | 3 |
| acute         | 3 |
| acid          | 3 |
| abnormalities | 3 |
| abl           | 3 |
| zap           | 2 |

|                |   |
|----------------|---|
| young          | 2 |
| xi             | 2 |
| x              | 2 |
| white          | 2 |
| weakness       | 2 |
| wasp           | 2 |
| wall           | 2 |
| versus         | 2 |
| vectors        | 2 |
| variants       | 2 |
| v              | 2 |
| udp            | 2 |
| ubiquitous     | 2 |
| tu             | 2 |
| transformed    | 2 |
| transformation | 2 |
| transferase    | 2 |
| trans          | 2 |
| toxic          | 2 |
| tonic          | 2 |
| thyroid        | 2 |
| thymidine      | 2 |
| thermal        | 2 |
| tensin         | 2 |
| tendons        | 2 |
| targeted       | 2 |
| systems        | 2 |
| synthase       | 2 |
| synaptic       | 2 |
| sustained      | 2 |
| subcutaneous   | 2 |
| structural     | 2 |
| storage        | 2 |
| stimulus       | 2 |
| sterol         | 2 |
| staining       | 2 |
| stable         | 2 |
| stability      | 2 |
| srebp          | 2 |
| spinal         | 2 |
| specialized    | 2 |



|                   |   |
|-------------------|---|
| somatic           | 2 |
| soft              | 2 |
| sink              | 2 |
| signature         | 2 |
| serum             | 2 |
| sclerosis         | 2 |
| sapk              | 2 |
| rodent            | 2 |
| rich              | 2 |
| reverse           | 2 |
| retinal           | 2 |
| reticulum         | 2 |
| replacement       | 2 |
| repair            | 2 |
| renal             | 2 |
| reflexes          | 2 |
| reductive         | 2 |
| reactions         | 2 |
| rb                | 2 |
| rate              | 2 |
| pulmonary         | 2 |
| proteinases       | 2 |
| promoters         | 2 |
| prokaryotic       | 2 |
| progressive       | 2 |
| progression       | 2 |
| profiles          | 2 |
| presequence       | 2 |
| polymorphonuclear | 2 |
| polymorphism      | 2 |
| placental         | 2 |
| phosphopeptide    | 2 |
| phospholipid      | 2 |
| phosphoinositide  | 2 |
| phosphoamino      | 2 |
| persistent        | 2 |
| permanent         | 2 |
| peptides          | 2 |
| pdgfr             | 2 |
| patterns          | 2 |
| pattern           | 2 |

|                 |   |
|-----------------|---|
| patients        | 2 |
| partially       | 2 |
| part            | 2 |
| paradoxical     | 2 |
| papilla         | 2 |
| orderly         | 2 |
| opsin           | 2 |
| oncoproteins    | 2 |
| oncogene        | 2 |
| oligonucleotide | 2 |
| odorant         | 2 |
| observed        | 2 |
| nonspecific     | 2 |
| nocturnal       | 2 |
| nociceptor      | 2 |
| nicotinamide    | 2 |
| neuron          | 2 |
| neuroimmune     | 2 |
| neurofilament   | 2 |
| native          | 2 |
| naked           | 2 |
| myristate       | 2 |
| myocardial      | 2 |
| multiprotein    | 2 |
| multifunctional | 2 |
| mucosal         | 2 |
| morpholino      | 2 |
| modified        | 2 |
| minor           | 2 |
| microtubule     | 2 |
| metal           | 2 |
| meningeal       | 2 |
| matrices        | 2 |
| mass            | 2 |
| markers         | 2 |
| marker          | 2 |
| manifestations  | 2 |
| m               | 2 |
| lymphocytes     | 2 |
| loss            | 2 |
| loose           | 2 |

|               |   |
|---------------|---|
| lipoprotein   | 2 |
| linker        | 2 |
| linked        | 2 |
| like          | 2 |
| lethal        | 2 |
| lesions       | 2 |
| knockout      | 2 |
| janus         | 2 |
| irf           | 2 |
| inverted      | 2 |
| insufficient  | 2 |
| injury        | 2 |
| inhibiting    | 2 |
| inherited     | 2 |
| inflammatory  | 2 |
| independent   | 2 |
| import        | 2 |
| hydrophobic   | 2 |
| huvec         | 2 |
| histidine     | 2 |
| guanylate     | 2 |
| groups        | 2 |
| greater       | 2 |
| gram          | 2 |
| glomerular    | 2 |
| gingival      | 2 |
| gene          | 2 |
| gel           | 2 |
| gastrocnemius | 2 |
| gamma         | 2 |
| functions     | 2 |
| functionally  | 2 |
| fractions     | 2 |
| forced        | 2 |
| foot          | 2 |
| focal         | 2 |
| flux          | 2 |
| fetal         | 2 |
| fasting       | 2 |
| extremely     | 2 |
| extended      | 2 |

|                |   |
|----------------|---|
| expressed      | 2 |
| exposure       | 2 |
| excess         | 2 |
| ester          | 2 |
| erythropoietin | 2 |
| erythrocyte    | 2 |
| epidermal      | 2 |
| enzyme         | 2 |
| enzymatic      | 2 |
| entry          | 2 |
| energies       | 2 |
| endoplasmic    | 2 |
| embryonic      | 2 |
| effect         | 2 |
| drosophila     | 2 |
| dnase          | 2 |
| division       | 2 |
| distal         | 2 |
| displacement   | 2 |
| diseases       | 2 |
| diminished     | 2 |
| differences    | 2 |
| diacylglycerol | 2 |
| development    | 2 |
| derived        | 2 |
| density        | 2 |
| dendritic      | 2 |
| demand         | 2 |
| dehydratase    | 2 |
| degranulation  | 2 |
| degeneration   | 2 |
| deficient      | 2 |
| deep           | 2 |
| cytoskeletal   | 2 |
| cytokines      | 2 |
| cysteine       | 2 |
| cycle          | 2 |
| curves         | 2 |
| cryptic        | 2 |
| crosslinking   | 2 |
| couples        | 2 |

|                 |   |
|-----------------|---|
| corneal         | 2 |
| controls        | 2 |
| constitutive    | 2 |
| congenita       | 2 |
| conformational  | 2 |
| concurrent      | 2 |
| complete        | 2 |
| competence      | 2 |
| combined        | 2 |
| colony          | 2 |
| cold            | 2 |
| code            | 2 |
| cluster         | 2 |
| clone           | 2 |
| cleft           | 2 |
| clearance       | 2 |
| classic         | 2 |
| chronic         | 2 |
| chinese         | 2 |
| checkpoint      | 2 |
| characteristics | 2 |
| chaperones      | 2 |
| channel         | 2 |
| catabolism      | 2 |
| carnitine       | 2 |
| cardiomyocyte   | 2 |
| carbohydrate    | 2 |
| capillaries     | 2 |
| callus          | 2 |
| bundles         | 2 |
| boxes           | 2 |
| bitter          | 2 |
| biopsies        | 2 |
| behavior        | 2 |
| basement        | 2 |
| baby            | 2 |
| b               | 2 |
| average         | 2 |
| autophagic      | 2 |
| autonomic       | 2 |
| astrocyte       | 2 |

|             |   |
|-------------|---|
| artery      | 2 |
| arrays      | 2 |
| antihuman   | 2 |
| antigens    | 2 |
| antibodies  | 2 |
| antibiotic  | 2 |
| analyses    | 2 |
| amyloid     | 2 |
| alveolar    | 2 |
| altered     | 2 |
| allergen    | 2 |
| allele      | 2 |
| agent       | 2 |
| adenylate   | 2 |
| activator   | 2 |
| acetate     | 2 |
| abnormality | 2 |
| abilities   | 2 |
| zymogen     | 1 |
| xviii       | 1 |
| xv          | 1 |
| xiv         | 1 |
| wounds      | 1 |
| wound       | 1 |
| wide        | 1 |
| whole       | 1 |
| visual      | 1 |
| viruses     | 1 |
| villus      | 1 |
| viability   | 1 |
| vessels     | 1 |
| vessel      | 1 |
| vertebrate  | 1 |
| vero        | 1 |
| velocity    | 1 |
| variation   | 1 |
| valve       | 1 |
| utilization | 1 |
| uterine     | 1 |
| usual       | 1 |
| uptake      | 1 |

|                      |   |
|----------------------|---|
| upper                | 1 |
| unrelated            | 1 |
| units                | 1 |
| ultrastructure       | 1 |
| ubiquitination       | 1 |
| tyrosyl              | 1 |
| ts                   | 1 |
| triggering           | 1 |
| triggered            | 1 |
| trigger              | 1 |
| triad                | 1 |
| treatments           | 1 |
| transforms           | 1 |
| transfer             | 1 |
| transdifferentiation | 1 |
| transactivators      | 1 |
| trail                | 1 |
| trafficking          | 1 |
| toxicity             | 1 |
| topoisomerase        | 1 |
| tibialis             | 1 |
| tibia                | 1 |
| thymus               | 1 |
| thymocyte            | 1 |
| thresholds           | 1 |
| therapeutic          | 1 |
| testis               | 1 |
| testicular           | 1 |
| termination          | 1 |
| term                 | 1 |
| temperature          | 1 |
| telomerase           | 1 |
| techniques           | 1 |
| taste                | 1 |
| tail                 | 1 |
| systolic             | 1 |
| synthases            | 1 |
| synchronous          | 1 |
| swelling             | 1 |
| sweat                | 1 |
| susceptibility       | 1 |

|               |   |
|---------------|---|
| supply        | 1 |
| sulfate       | 1 |
| suicide       | 1 |
| sugar         | 1 |
| subtilisin    | 1 |
| substitutions | 1 |
| substituted   | 1 |
| subfragment   | 1 |
| subfamily     | 1 |
| subepithelial | 1 |
| structures    | 1 |
| strip         | 1 |
| stretch       | 1 |
| strength      | 1 |
| strand        | 1 |
| stocks        | 1 |
| stiffness     | 1 |
| steroid       | 1 |
| stem          | 1 |
| stage         | 1 |
| stabilizing   | 1 |
| stabilized    | 1 |
| spontaneously | 1 |
| spontaneous   | 1 |
| split         | 1 |
| spiral        | 1 |
| spindle       | 1 |
| sphingosine   | 1 |
| sphingolipid  | 1 |
| spermatocyte  | 1 |
| sperm         | 1 |
| spectrometry  | 1 |
| specificity   | 1 |
| species       | 1 |
| space         | 1 |
| sorting       | 1 |
| snornp        | 1 |
| smooth        | 1 |
| slit          | 1 |
| sleep         | 1 |
| skeleton      | 1 |



|               |   |
|---------------|---|
| sirtuin       | 1 |
| sinus         | 1 |
| simplex       | 1 |
| simple        | 1 |
| sheet         | 1 |
| sharp         | 1 |
| shared        | 1 |
| sera          | 1 |
| sequencing    | 1 |
| separation    | 1 |
| sensor        | 1 |
| sensitization | 1 |
| self          | 1 |
| segments      | 1 |
| secondary     | 1 |
| screening     | 1 |
| scaffolding   | 1 |
| sarcomere     | 1 |
| salicylate    | 1 |
| s             | 1 |
| rupture       | 1 |
| role          | 1 |
| rod           | 1 |
| rii           | 1 |
| ridges        | 1 |
| ridge         | 1 |
| ribosome      | 1 |
| ribosomal     | 1 |
| riboside      | 1 |
| rhythmic      | 1 |
| rhodanese     | 1 |
| rhesus        | 1 |
| reversed      | 1 |
| retroviruses  | 1 |
| retroviral    | 1 |
| retinoic      | 1 |
| retention     | 1 |
| retardation   | 1 |
| resting       | 1 |
| respiratory   | 1 |
| respiration   | 1 |

|               |   |
|---------------|---|
| resistant     | 1 |
| residual      | 1 |
| required      | 1 |
| repressor     | 1 |
| repeats       | 1 |
| remote        | 1 |
| regulators    | 1 |
| regulation    | 1 |
| regular       | 1 |
| regression    | 1 |
| reduction     | 1 |
| reductases    | 1 |
| redox         | 1 |
| recurrent     | 1 |
| recombination | 1 |
| rates         | 1 |
| random        | 1 |
| radical       | 1 |
| racemase      | 1 |
| quality       | 1 |
| qualitative   | 1 |
| quail         | 1 |
| pyruvate      | 1 |
| punctate      | 1 |
| ptp           | 1 |
| ptk           | 1 |
| ptdins        | 1 |
| proximal      | 1 |
| proteolysis   | 1 |
| proteoglycans | 1 |
| property      | 1 |
| proper        | 1 |
| propensity    | 1 |
| promoting     | 1 |
| prolyl        | 1 |
| proliferative | 1 |
| proliferating | 1 |
| programmed    | 1 |
| progenitors   | 1 |
| progenitor    | 1 |
| profile       | 1 |

|                      |   |
|----------------------|---|
| products             | 1 |
| product              | 1 |
| probes               | 1 |
| probe                | 1 |
| principal            | 1 |
| priming              | 1 |
| presynaptic          | 1 |
| presumed             | 1 |
| pressure             | 1 |
| presentation         | 1 |
| preparation          | 1 |
| postmenopausal       | 1 |
| portal               | 1 |
| porcine              | 1 |
| polarity             | 1 |
| points               | 1 |
| point                | 1 |
| pluripotent          | 1 |
| plasmodium           | 1 |
| plasmin              | 1 |
| plasmid              | 1 |
| plasma               | 1 |
| plantar              | 1 |
| physically           | 1 |
| photosensitivity     | 1 |
| photochemical        | 1 |
| phosphoproteins      | 1 |
| phosphoprotein       | 1 |
| phospholipase        | 1 |
| phosphodiesterase    | 1 |
| phospho              | 1 |
| phosphatidylinositol | 1 |
| phagocytic           | 1 |
| periodic             | 1 |
| period               | 1 |
| pericyte             | 1 |
| peptidases           | 1 |
| pelvic               | 1 |
| pcr                  | 1 |
| patterning           | 1 |
| passive              | 1 |

|                      |   |
|----------------------|---|
| passage              | 1 |
| particles            | 1 |
| parp                 | 1 |
| parathyroid          | 1 |
| parasite             | 1 |
| paraoxonase          | 1 |
| parallel             | 1 |
| pantothenate         | 1 |
| palmitoyltransferase | 1 |
| painful              | 1 |
| packaging            | 1 |
| outgrowth            | 1 |
| outcome              | 1 |
| ouabain              | 1 |
| osteopetrosis        | 1 |
| osteoblast           | 1 |
| osmotic              | 1 |
| orientation          | 1 |
| organization         | 1 |
| optimum              | 1 |
| onset                | 1 |
| oncogenes            | 1 |
| omental              | 1 |
| oligonucleotides     | 1 |
| oligodendrocyte      | 1 |
| ocular               | 1 |
| octamer              | 1 |
| number               | 1 |
| nucleosomes          | 1 |
| nuclei               | 1 |
| nonlinear            | 1 |
| nomenclature         | 1 |
| nociception          | 1 |
| nk                   | 1 |
| nevi                 | 1 |
| neutrophils          | 1 |
| neutral              | 1 |
| neurons              | 1 |
| neuromuscular        | 1 |
| neuroepithelial      | 1 |
| neural               | 1 |

|                    |   |
|--------------------|---|
| nerve              | 1 |
| neovascularization | 1 |
| necrosis           | 1 |
| narrow             | 1 |
| nak                | 1 |
| myopathy           | 1 |
| myocytes           | 1 |
| myoblasts          | 1 |
| mycobacterial      | 1 |
| myc                | 1 |
| myb                | 1 |
| mutation           | 1 |
| mutated            | 1 |
| mutants            | 1 |
| murine             | 1 |
| movements          | 1 |
| mosaicism          | 1 |
| monophosphates     | 1 |
| monophosphate      | 1 |
| monocyte           | 1 |
| monkey             | 1 |
| modulator          | 1 |
| modulated          | 1 |
| modifiers          | 1 |
| modifier           | 1 |
| mixtures           | 1 |
| mixed              | 1 |
| mitotic            | 1 |
| minisatellite      | 1 |
| mimicry            | 1 |
| mimetic            | 1 |
| migrating          | 1 |
| microvasculature   | 1 |
| methylated         | 1 |
| methylase          | 1 |
| methyl             | 1 |
| metalloproteinases | 1 |
| metalloproteinase  | 1 |
| metalloprotease    | 1 |
| metabolite         | 1 |
| messages           | 1 |

|                |   |
|----------------|---|
| mesangial      | 1 |
| membranes      | 1 |
| melting        | 1 |
| melanoma       | 1 |
| melanin        | 1 |
| medullary      | 1 |
| mediator       | 1 |
| mechanical     | 1 |
| measurements   | 1 |
| maximum        | 1 |
| maternal       | 1 |
| marrow         | 1 |
| maps           | 1 |
| mapping        | 1 |
| manganese      | 1 |
| macrophage     | 1 |
| lys            | 1 |
| lymphoma       | 1 |
| lymphoblastoid | 1 |
| luciferase     | 1 |
| lovastatin     | 1 |
| los            | 1 |
| locus          | 1 |
| localized      | 1 |
| lithium        | 1 |
| lines          | 1 |
| lineage        | 1 |
| ligand         | 1 |
| life           | 1 |
| leukocytes     | 1 |
| leukocyte      | 1 |
| leprosy        | 1 |
| lens           | 1 |
| length         | 1 |
| left           | 1 |
| leakage        | 1 |
| leader         | 1 |
| layers         | 1 |
| lattices       | 1 |
| lateral        | 1 |
| lacz           | 1 |

|                   |   |
|-------------------|---|
| lactamases        | 1 |
| labeled           | 1 |
| kinetics          | 1 |
| keratinocytes     | 1 |
| keratinocyte      | 1 |
| isoniazid         | 1 |
| isoforms          | 1 |
| irradiation       | 1 |
| irradiated        | 1 |
| irak              | 1 |
| ion               | 1 |
| invertebrate      | 1 |
| invasion          | 1 |
| invariant         | 1 |
| intolerance       | 1 |
| intestinal        | 1 |
| interlobular      | 1 |
| interface         | 1 |
| intercellular     | 1 |
| instability       | 1 |
| insoluble         | 1 |
| inflammation      | 1 |
| infiltration      | 1 |
| inducing          | 1 |
| inducers          | 1 |
| inducer           | 1 |
| indomethacin      | 1 |
| indirect          | 1 |
| incubation        | 1 |
| inappropriate     | 1 |
| immunosuppressive | 1 |
| immunoreactive    | 1 |
| immune            | 1 |
| immobilized       | 1 |
| iiic              | 1 |
| iiia              | 1 |
| iiib              | 1 |
| iiia              | 1 |
| hypoplastic       | 1 |
| hypoplasia        | 1 |
| hypoglycemia      | 1 |

|                          |   |
|--------------------------|---|
| hypersecretion           | 1 |
| hyperalgesia             | 1 |
| hydroxymethyltransferase | 1 |
| hydrolysis               | 1 |
| hydrolases               | 1 |
| host                     | 1 |
| hosphopeptide            | 1 |
| homologous               | 1 |
| homolog                  | 1 |
| history                  | 1 |
| hip                      | 1 |
| higher                   | 1 |
| heterologous             | 1 |
| heteroduplexes           | 1 |
| herpesvirus              | 1 |
| herpes                   | 1 |
| heritable                | 1 |
| hepatocytes              | 1 |
| hepatocellular           | 1 |
| hemorrhagic              | 1 |
| hematopoietic            | 1 |
| helices                  | 1 |
| healing                  | 1 |
| hcv                      | 1 |
| harmful                  | 1 |
| hair                     | 1 |
| group                    | 1 |
| groove                   | 1 |
| granules                 | 1 |
| granule                  | 1 |
| gorilla                  | 1 |
| golgi                    | 1 |
| goat                     | 1 |
| glycinergic              | 1 |
| glycine                  | 1 |
| glycation                | 1 |
| glutamatergic            | 1 |
| glucosyltransferase      | 1 |
| glucokinase              | 1 |
| glands                   | 1 |
| germinal                 | 1 |



|                       |   |
|-----------------------|---|
| genotype              | 1 |
| genomic               | 1 |
| generation            | 1 |
| gap                   | 1 |
| galactosyltransferase | 1 |
| galactose             | 1 |
| fusions               | 1 |
| fusion                | 1 |
| freeze                | 1 |
| fragment              | 1 |
| follicle              | 1 |
| foci                  | 1 |
| fluoride              | 1 |
| filaments             | 1 |
| fibers                | 1 |
| female                | 1 |
| feeding               | 1 |
| fat                   | 1 |
| fanconi               | 1 |
| families              | 1 |
| falciparum            | 1 |
| face                  | 1 |
| extreme               | 1 |
| extraskkeletal        | 1 |
| extra                 | 1 |
| extensor              | 1 |
| extension             | 1 |
| experimental          | 1 |
| exogenous             | 1 |
| event                 | 1 |
| ethylmaleimide        | 1 |
| ethidium              | 1 |
| estrogen              | 1 |
| esterases             | 1 |
| erythroblast          | 1 |
| erbb                  | 1 |
| equivalent            | 1 |
| epstein               | 1 |
| eosinophil            | 1 |
| enzymes               | 1 |
| environmental         | 1 |

|                    |   |
|--------------------|---|
| environment        | 1 |
| enterocyte         | 1 |
| enos               | 1 |
| enhancers          | 1 |
| enhancement        | 1 |
| engine             | 1 |
| endotoxic          | 1 |
| endometrial        | 1 |
| endocardial        | 1 |
| end                | 1 |
| empty              | 1 |
| elimination        | 1 |
| electrophysiologic | 1 |
| electroconvulsive  | 1 |
| elastase           | 1 |
| ef                 | 1 |
| edema              | 1 |
| eccrine            | 1 |
| ec                 | 1 |
| ebv                | 1 |
| e                  | 1 |
| dysfunction        | 1 |
| dynein             | 1 |
| dopamine           | 1 |
| dnaj               | 1 |
| disordered         | 1 |
| disease            | 1 |
| discrete           | 1 |
| directly           | 1 |
| diphosphates       | 1 |
| dinucleotide       | 1 |
| dimethyl           | 1 |
| dihydrolipoamide   | 1 |
| diffuse            | 1 |
| differential       | 1 |
| difference         | 1 |
| dids               | 1 |
| diameters          | 1 |
| diameter           | 1 |
| developing         | 1 |
| determinants       | 1 |

|                     |   |
|---------------------|---|
| determinant         | 1 |
| destruction         | 1 |
| descending          | 1 |
| dermatitis          | 1 |
| derivatives         | 1 |
| derivative          | 1 |
| deprivation         | 1 |
| dependency          | 1 |
| deoxyribonucleoside | 1 |
| dense               | 1 |
| denaturation        | 1 |
| demethylases        | 1 |
| degradation         | 1 |
| degenerative        | 1 |
| decidual            | 1 |
| de                  | 1 |
| d                   | 1 |
| cytochrome          | 1 |
| cysts               | 1 |
| cushions            | 1 |
| curve               | 1 |
| currents            | 1 |
| cortical            | 1 |
| corpses             | 1 |
| cores               | 1 |
| cord                | 1 |
| copper              | 1 |
| coordinating        | 1 |
| conversion          | 1 |
| containing          | 1 |
| constant            | 1 |
| connections         | 1 |
| congenital          | 1 |
| conditions          | 1 |
| compression         | 1 |
| composition         | 1 |
| compensatory        | 1 |
| commercial          | 1 |
| colon               | 1 |
| collateral          | 1 |
| coagulation         | 1 |

|                   |   |
|-------------------|---|
| clusters          | 1 |
| clearing          | 1 |
| circulating       | 1 |
| circadian         | 1 |
| chymotrypsin      | 1 |
| chromosomes       | 1 |
| chorionic         | 1 |
| chloride          | 1 |
| chitinase         | 1 |
| chimeric          | 1 |
| chick             | 1 |
| chicago           | 1 |
| chemoattractant   | 1 |
| chaperonin        | 1 |
| channels          | 1 |
| challenge         | 1 |
| chains            | 1 |
| cervical          | 1 |
| cerebral          | 1 |
| centromeric       | 1 |
| center            | 1 |
| caucasian         | 1 |
| cation            | 1 |
| catenin           | 1 |
| cases             | 1 |
| cartilaginous     | 1 |
| carrier           | 1 |
| cardiovascular    | 1 |
| cardiomyopathy    | 1 |
| cardiomyocytes    | 1 |
| carcinoma         | 1 |
| carcinogenic      | 1 |
| carboxypeptidases | 1 |
| carboxypeptidase  | 1 |
| carbonic          | 1 |
| capsular          | 1 |
| capacities        | 1 |
| candidate         | 1 |
| cancer            | 1 |
| calreticulin      | 1 |
| calnexin          | 1 |

|                  |   |
|------------------|---|
| calmodulin       | 1 |
| calf             | 1 |
| bulk             | 1 |
| bronchiolar      | 1 |
| blue             | 1 |
| blocks           | 1 |
| blocking         | 1 |
| biotinylation    | 1 |
| biology          | 1 |
| biogenesis       | 1 |
| bed              | 1 |
| bcr              | 1 |
| basic            | 1 |
| baseline         | 1 |
| base             | 1 |
| barr             | 1 |
| baculoviral      | 1 |
| avoidance        | 1 |
| avian            | 1 |
| auxiliary        | 1 |
| autonomous       | 1 |
| autoimmune       | 1 |
| atypical         | 1 |
| attribute        | 1 |
| attenuation      | 1 |
| attenuated       | 1 |
| atrophy          | 1 |
| atrioventricular | 1 |
| atopic           | 1 |
| asymmetric       | 1 |
| aspirin          | 1 |
| aspartyl         | 1 |
| asparagine       | 1 |
| arrangement      | 1 |
| area             | 1 |
| architecture     | 1 |
| arch             | 1 |
| aqueous          | 1 |
| aps              | 1 |
| apical           | 1 |
| aortic           | 1 |

|                |   |
|----------------|---|
| antiviral      | 1 |
| antigen        | 1 |
| antiangiogenic | 1 |
| anterior       | 1 |
| anomaly        | 1 |
| ankyrin        | 1 |
| anhydrase      | 1 |
| angiogenesis   | 1 |
| angeles        | 1 |
| anemia         | 1 |
| androgenic     | 1 |
| analogs        | 1 |
| analog         | 1 |
| amplification  | 1 |
| amniotic       | 1 |
| amnion         | 1 |
| aminoglycoside | 1 |
| amines         | 1 |
| ameloblast     | 1 |
| amanitin       | 1 |
| alternative    | 1 |
| allosteric     | 1 |
| alleles        | 1 |
| albumin        | 1 |
| alanine        | 1 |
| ala            | 1 |
| airway         | 1 |
| aif            | 1 |
| agonist        | 1 |
| aging          | 1 |
| aggregated     | 1 |
| affinity       | 1 |
| adventitial    | 1 |
| administration | 1 |
| adjuvant       | 1 |
| adipose        | 1 |
| adipocyte      | 1 |
| adhesiveness   | 1 |
| adenine        | 1 |
| additive       | 1 |
| addition       | 1 |

|             |   |
|-------------|---|
| adaptor     | 1 |
| activating  | 1 |
| acids       | 1 |
| accounts    | 1 |
| access      | 1 |
| acceptors   | 1 |
| accelerated | 1 |
| aberrant    | 1 |
| abdominal   | 1 |

**Table S28. Syntactic nature and associated word counts of Collective + Individual mode ‘dismantled’ noun-phrases from the bPTH(7-34) superconserved dataset.** For each identified word the number of times the specific word occurred in the list of dismantled noun-phrases from *Textrovs!* Individual processing is given. Word count scores were generated from the Wordle-sourced cloud using WriteWords ([http://www.writewords.org.uk/word\\_count.asp](http://www.writewords.org.uk/word_count.asp)). The words are sorted according to functional syntactic type.

| FUNCTION            | Count | ADJECTIVE       | Count | NOUN        | Count | PROPER-NOUN       | Count |
|---------------------|-------|-----------------|-------|-------------|-------|-------------------|-------|
| phosphorylation     | 257   | catalytic       | 116   | protein     | 183   | histone           | 156   |
| activation          | 232   | intrinsic       | 111   | kinase      | 176   | serine            | 113   |
| activity            | 145   | mitochondrial   | 107   | domain      | 125   | fibroblasts       | 110   |
| inhibition          | 112   | dermal          | 63    | kinases     | 102   | insulin           | 103   |
| apoptosis           | 107   | camp-dependent  | 51    | human       | 93    | collagen          | 102   |
| apoptotic           | 105   | connective      | 41    | site        | 74    | mitochondria      | 65    |
| transduction        | 105   | chaperone       | 39    | cell        | 51    | caspase           | 59    |
| signal              | 95    | potential       | 32    | tissue      | 40    | acetyltransferase | 52    |
| remodeling          | 85    | type            | 31    | pathway     | 37    | jurkat            | 38    |
| inhibited           | 76    | inhibitor       | 27    | factor      | 36    | deacetylase       | 38    |
| acetylation         | 56    | primary         | 24    | sites       | 35    | pka               | 33    |
| transactivation     | 53    | core            | 23    | cells       | 32    | ceramide          | 33    |
| transforming        | 52    | specific        | 23    | proteins    | 31    | chromatin         | 31    |
| increased           | 48    | nucleosomal     | 22    | cytosol     | 31    | smad              | 30    |
| anchor              | 43    | acetylated      | 22    | n-terminal  | 31    | tyrosine          | 27    |
| growth              | 42    | binding         | 21    | c-terminal  | 27    | cdna              | 26    |
| heat                | 48    | protein-binding | 20    | coactivator | 26    | adipocytes        | 26    |
| shock               | 39    | downstream      | 20    | promoter    | 24    | imperfecta        | 26    |
| interacting         | 30    | enhanced        | 19    | fracture    | 24    | factor-beta       | 23    |
| response            | 28    | cellular        | 18    | pathways    | 18    | osteogenesis      | 23    |
| immunoprecipitation | 26    | element-binding | 17    | library     | 18    | vitro             | 23    |
| initiator           | 26    |                 |       | cofactors   | 18    | hdac              | 22    |
| heat-shock          | 25    |                 |       | membrane    | 18    | collagens         | 21    |
| expression          | 23    |                 |       |             |       | adenovirus        | 20    |
| signaling           | 22    |                 |       |             |       | mouse             | 19    |
| cultured            | 22    |                 |       |             |       | histones          | 19    |
|                     |       |                 |       |             |       | collagenase       | 19    |
|                     |       |                 |       |             |       | ccaat             | 18    |
|                     |       |                 |       |             |       | t-cell            | 18    |
|                     |       |                 |       |             |       | rat               | 17    |
